# Supplementary material
Source: PubMed Central journal article supplement (PMC4223484)
Supplement: supp_M114.039925_mcp.M114.039925-2.pdf [file supp_M114.039925_mcp.M114.039925-2.pdf]

## Supplemental material: MS<sup>n</sup> peak lists

### Structural Characterization by MS<sup>n</sup> of Human Milk Glycans Recognized by Human Rotaviruses

David J. Ashline<sup>1</sup>, Ying Yu<sup>2</sup>, Yi Lasanajak<sup>2</sup>, Xuezheng Song<sup>2</sup>, Liya Hu<sup>3</sup>, Sasirekha Ramani<sup>4</sup>, Venkataram Prasad<sup>3,4</sup>, Mary K. Estes<sup>4</sup>, Richard D. Cummings<sup>2</sup>, David F. Smith<sup>2</sup>,  
and Vernon N. Reinhold<sup>1</sup>

<sup>1</sup>Glycomics Center, University of New Hampshire, Durham, NH, <sup>2</sup>Department of Biochemistry and the National Center for Functional Glycomics, Emory University School of Medicine, Atlanta, GA, <sup>3</sup>Verna and Marris McLean Department of Biochemistry and Molecular Biology and <sup>4</sup>Department of Molecular Virology and Microbiology, Baylor College of Medicine, Houston, TX

#### Peak lists for mass spectra

Peak lists are the 50 most intense peaks. Spectra were collected in profile mode, then converted to centroid in Thermo Xcalibur 2.0 using their valley detection algorithm. Peaks are listed in order of m/z. Scan headers indicate actual precursor m/z settings and number of scans. Microscan count, maximum injection time, and AGC target values were modified depending on anticipated signal intensity.

#### HMG 13 Mass spectral peak lists

Mass spectra were acquired in profile mode, then centroided using the valley detection algorithm. The top 50 peaks are shown. Isolation mass and width are adjusted to capture an entire isotopic envelope, where possible.

#### SPECTRUM - MS

7-1-13\_HMG13\_837\_MS2\_01.raw

ITMS + p ESI E Full ms2 838.00@cid35.00 [230.00-2000.00]

Scan #: 1-20

RT: 0.00-1.70

AV: 20

| m/z | Intensity | Relative |
|-----|-----------|----------|
|-----|-----------|----------|

|        |        |      |
|--------|--------|------|
| 259.14 | 3922.3 | 7.70 |
|--------|--------|------|

|        |       |      |
|--------|-------|------|
| 260.15 | 495.8 | 0.97 |
|--------|-------|------|

|        |       |      |
|--------|-------|------|
| 406.20 | 449.0 | 0.88 |
|--------|-------|------|

|        |        |      |
|--------|--------|------|
| 412.27 | 2341.7 | 4.60 |
|--------|--------|------|

|         |         |         |        |
|---------|---------|---------|--------|
| 413.28  | 574.7   | 1.13    |        |
| 472.31  | 928.3   | 1.82    |        |
| 486.32  | 32794.3 |         | 64.40  |
| 487.33  | 8833.7  |         | 17.35  |
| 488.34  | 1477.2  |         | 2.90   |
| 581.40  | 572.2   | 1.12    |        |
| 581.90  | 514.6   | 1.01    |        |
| 605.42  | 4632.9  |         | 9.10   |
| 605.93  | 4132.7  |         | 8.12   |
| 606.43  | 1659.9  |         | 3.26   |
| 606.92  | 440.6   | 0.87    |        |
| 681.97  | 8610.9  |         | 16.91  |
| 682.47  | 8917.3  |         | 17.51  |
| 682.97  | 3982.5  |         | 7.82   |
| 683.47  | 1162.7  |         | 2.28   |
| 718.43  | 533.9   | 1.05    |        |
| 718.97  | 13502.4 |         | 26.52  |
| 719.47  | 14519.2 |         | 28.51  |
| 719.96  | 6699.9  |         | 13.16  |
| 720.48  | 2331.9  |         | 4.58   |
| 721.00  | 415.5   | 0.82    |        |
| 738.51  | 8563.1  |         | 16.82  |
| 739.52  | 4245.7  |         | 8.34   |
| 740.52  | 1065.0  |         | 2.09   |
| 760.44  | 529.9   | 1.04    |        |
| 809.04  | 821.9   | 1.61    |        |
| 837.10  | 10414.9 |         | 20.45  |
| 837.57  | 11023.1 |         | 21.65  |
| 838.06  | 5326.2  |         | 10.46  |
| 838.55  | 2349.2  |         | 4.61   |
| 839.08  | 350.3   | 0.69    |        |
| 935.57  | 2100.4  |         | 4.12   |
| 936.58  | 1324.5  |         | 2.60   |
| 937.59  | 354.4   | 0.70    |        |
| 983.66  | 416.8   | 0.82    |        |
| 1079.62 |         | 1261.8  | 2.48   |
| 1080.63 |         | 891.5   | 1.75   |
| 1167.60 |         | 401.7   | 0.79   |
| 1187.75 |         | 50921.3 | 100.00 |
| 1188.76 |         | 41443.1 | 81.39  |
| 1189.76 |         | 15318.7 | 30.08  |
| 1190.77 |         | 3546.4  | 6.96   |
| 1414.88 |         | 11038.6 | 21.68  |
| 1415.89 |         | 11471.1 | 22.53  |
| 1416.89 |         | 4940.9  | 9.70   |
| 1417.90 |         | 1383.8  | 2.72   |

SPECTRUM - MS

7-1-13\_HMG13\_837\_MS3\_935\_01.raw

ITMS + p ESI E Full ms3 838.00@cid35.00 936.00@cid35.00 [255.00-1000.00]

Scan #: 1-50

RT: 0.00-3.52

AV: 50

m/z Intensity Relative

|        |       |        |
|--------|-------|--------|
| 268.14 | 1.7   | 0.32   |
| 315.19 | 2.7   | 0.50   |
| 398.24 | 0.9   | 0.17   |
| 412.26 | 7.6   | 1.41   |
| 413.21 | 0.8   | 0.15   |
| 413.40 | 0.5   | 0.10   |
| 424.24 | 7.1   | 1.32   |
| 425.25 | 1.3   | 0.24   |
| 430.30 | 1.2   | 0.21   |
| 440.23 | 2.4   | 0.44   |
| 441.28 | 0.5   | 0.09   |
| 442.31 | 0.7   | 0.14   |
| 444.30 | 1.3   | 0.24   |
| 454.28 | 1.3   | 0.24   |
| 472.30 | 538.5 | 100.00 |
| 473.31 | 97.6  | 18.12  |
| 486.31 | 172.1 | 31.96  |
| 487.32 | 31.7  | 5.89   |
| 542.39 | 1.1   | 0.21   |
| 543.36 | 0.5   | 0.10   |
| 625.37 | 53.5  | 9.93   |
| 626.38 | 15.1  | 2.81   |
| 628.41 | 0.6   | 0.11   |
| 657.45 | 2.0   | 0.37   |
| 658.46 | 0.8   | 0.15   |
| 690.53 | 0.9   | 0.16   |
| 699.44 | 353.8 | 65.70  |
| 700.44 | 111.2 | 20.65  |
| 701.53 | 1.1   | 0.20   |
| 702.43 | 0.5   | 0.09   |
| 708.37 | 1.7   | 0.32   |
| 708.55 | 0.9   | 0.18   |
| 709.44 | 0.6   | 0.11   |
| 717.44 | 3.6   | 0.66   |
| 738.50 | 7.6   | 1.42   |
| 739.54 | 2.7   | 0.50   |
| 766.49 | 5.3   | 0.98   |
| 767.52 | 2.5   | 0.47   |
| 778.48 | 8.6   | 1.59   |
| 779.56 | 2.3   | 0.43   |
| 861.55 | 0.5   | 0.10   |
| 864.55 | 0.6   | 0.12   |
| 893.55 | 4.5   | 0.83   |
| 894.57 | 1.1   | 0.21   |
| 903.54 | 0.8   | 0.15   |
| 905.46 | 1.3   | 0.25   |
| 905.63 | 0.9   | 0.17   |

|        |      |      |
|--------|------|------|
| 906.52 | 0.8  | 0.15 |
| 935.56 | 37.4 | 6.95 |
| 936.56 | 21.6 | 4.00 |

SPECTRUM - MS

7-1-13\_HMG13\_837\_MS4\_935\_486\_01.raw

ITMS + p ESI E Full ms4 838.00@cid35.00 936.00@cid35.00 487.00@cid35.00 [130.00-500.00]

Scan #: 1-50

RT: 0.00-3.38

AV: 50

| m/z | Intensity | Relative |
|-----|-----------|----------|
|-----|-----------|----------|

|        |      |       |
|--------|------|-------|
| 177.01 | 0.1  | 0.50  |
| 178.03 | 0.1  | 0.82  |
| 208.11 | 0.9  | 7.72  |
| 209.03 | 0.1  | 0.90  |
| 209.22 | 0.0  | 0.30  |
| 211.20 | 0.0  | 0.38  |
| 218.14 | 0.1  | 1.02  |
| 222.05 | 0.1  | 0.52  |
| 241.08 | 0.4  | 3.73  |
| 241.21 | 0.3  | 2.50  |
| 249.86 | 0.1  | 0.78  |
| 250.11 | 0.8  | 6.64  |
| 251.12 | 0.0  | 0.42  |
| 251.77 | 0.1  | 0.72  |
| 252.14 | 1.5  | 12.55 |
| 252.99 | 0.0  | 0.33  |
| 253.17 | 0.1  | 0.85  |
| 257.11 | 0.1  | 0.61  |
| 257.24 | 0.0  | 0.30  |
| 259.13 | 11.3 | 95.10 |
| 260.07 | 0.8  | 7.05  |
| 260.26 | 0.3  | 2.76  |
| 268.15 | 0.5  | 4.49  |
| 300.92 | 0.0  | 0.36  |
| 320.16 | 0.0  | 0.33  |
| 341.08 | 0.1  | 0.59  |
| 341.29 | 0.2  | 1.45  |
| 351.97 | 0.0  | 0.41  |
| 353.33 | 0.0  | 0.39  |
| 356.22 | 0.1  | 0.50  |
| 357.24 | 0.1  | 0.65  |
| 366.07 | 0.0  | 0.40  |
| 366.24 | 0.0  | 0.35  |
| 380.31 | 0.0  | 0.30  |
| 382.27 | 0.2  | 1.63  |
| 384.22 | 0.2  | 1.96  |
| 385.01 | 0.0  | 0.35  |
| 394.09 | 0.0  | 0.30  |
| 394.40 | 0.0  | 0.41  |

|        |      |        |
|--------|------|--------|
| 398.30 | 0.0  | 0.34   |
| 410.16 | 0.1  | 1.09   |
| 412.27 | 11.8 | 100.00 |
| 413.02 | 0.3  | 2.75   |
| 413.28 | 1.7  | 14.38  |
| 415.18 | 0.1  | 1.26   |
| 415.36 | 0.1  | 0.79   |
| 444.29 | 8.3  | 69.82  |
| 445.31 | 1.1  | 8.90   |
| 486.30 | 2.8  | 23.66  |
| 487.31 | 0.4  | 3.39   |

SPECTRUM - MS

7-1-13\_HMG13\_837\_MS4\_935\_472\_01.raw

ITMS + p ESI E Full ms4 838.00@cid35.00 936.00@cid35.00 473.00@cid35.00 [130.00-500.00]

Scan #: 1-50

RT: 0.00-3.34

AV: 50

m/z Intensity Relative

|        |      |        |
|--------|------|--------|
| 149.01 | 0.7  | 2.56   |
| 170.93 | 0.3  | 1.08   |
| 171.06 | 0.2  | 0.90   |
| 178.04 | 0.2  | 0.58   |
| 180.04 | 1.0  | 3.85   |
| 188.09 | 0.4  | 1.66   |
| 194.05 | 0.4  | 1.68   |
| 199.14 | 0.1  | 0.47   |
| 204.00 | 0.8  | 3.16   |
| 218.07 | 0.3  | 0.96   |
| 220.09 | 2.9  | 10.79  |
| 221.09 | 0.4  | 1.46   |
| 227.10 | 16.2 | 61.05  |
| 228.11 | 1.3  | 4.91   |
| 229.19 | 0.1  | 0.48   |
| 232.08 | 0.1  | 0.50   |
| 236.09 | 3.5  | 13.20  |
| 237.01 | 0.1  | 0.52   |
| 242.93 | 0.2  | 0.60   |
| 245.12 | 7.9  | 29.68  |
| 246.12 | 0.7  | 2.61   |
| 250.04 | 0.4  | 1.48   |
| 250.19 | 0.4  | 1.40   |
| 268.15 | 26.5 | 100.00 |
| 269.14 | 2.2  | 8.14   |
| 287.14 | 0.6  | 2.19   |
| 292.15 | 0.2  | 0.82   |
| 296.20 | 0.2  | 0.86   |
| 315.19 | 21.5 | 81.33  |
| 316.21 | 2.6  | 9.73   |
| 324.13 | 0.5  | 1.84   |

|        |      |       |
|--------|------|-------|
| 327.16 | 0.1  | 0.49  |
| 366.01 | 0.2  | 0.91  |
| 366.23 | 0.2  | 0.64  |
| 367.16 | 0.1  | 0.50  |
| 368.26 | 0.2  | 0.82  |
| 380.23 | 1.3  | 4.97  |
| 381.18 | 0.1  | 0.56  |
| 385.27 | 0.2  | 0.70  |
| 398.25 | 1.5  | 5.57  |
| 399.20 | 1.1  | 4.29  |
| 408.25 | 0.1  | 0.52  |
| 430.33 | 0.6  | 2.46  |
| 440.24 | 5.4  | 20.34 |
| 441.10 | 0.2  | 0.62  |
| 441.31 | 0.7  | 2.59  |
| 442.27 | 2.7  | 10.22 |
| 443.29 | 0.2  | 0.70  |
| 472.30 | 11.7 | 44.17 |
| 473.30 | 2.3  | 8.53  |

## HMG 14 Mass spectral peak lists

Mass spectra were acquired in profile mode, then centroided using the valley detection algorithm. The top 50 peaks are shown. Isolation mass and width are adjusted to capture an entire isotopic envelope, where possible.

### SPECTRUM - MS

7-1-13\_HMG14\_837\_MS2\_01.raw

ITMS + p ESI E Full ms2 838.00@cid35.00 [230.00-2000.00]

Scan #: 1-20

RT: 0.00-3.55

AV: 20

| m/z    | Intensity | Relative |
|--------|-----------|----------|
| 329.23 | 318.4     | 0.79     |
| 406.21 | 452.9     | 1.12     |
| 444.32 | 1352.6    | 3.36     |
| 445.33 | 282.2     | 0.70     |
| 454.31 | 244.1     | 0.61     |
| 464.27 | 273.0     | 0.68     |
| 472.32 | 1195.1    | 2.97     |
| 473.33 | 270.9     | 0.67     |
| 486.34 | 36727.4   | 91.16    |
| 487.35 | 8210.4    | 20.38    |
| 488.36 | 1431.1    | 3.55     |
| 534.41 | 317.8     | 0.79     |
| 605.42 | 5111.2    | 12.69    |
| 605.93 | 3307.6    | 8.21     |
| 606.43 | 1370.9    | 3.40     |
| 606.95 | 423.0     | 1.05     |
| 630.40 | 345.0     | 0.86     |
| 718.46 | 597.7     | 1.48     |
| 718.97 | 280.2     | 0.70     |
| 719.46 | 372.0     | 0.92     |
| 720.51 | 242.3     | 0.60     |
| 738.52 | 8428.1    | 20.92    |
| 739.53 | 3289.5    | 8.16     |
| 740.53 | 847.0     | 2.10     |
| 760.45 | 441.8     | 1.10     |
| 787.54 | 262.3     | 0.65     |
| 809.07 | 677.1     | 1.68     |
| 821.06 | 459.4     | 1.14     |
| 821.56 | 416.3     | 1.03     |
| 822.07 | 388.3     | 0.96     |
| 822.59 | 255.5     | 0.63     |
| 837.12 | 5303.0    | 13.16    |
| 837.59 | 4751.3    | 11.79    |
| 838.08 | 2490.5    | 6.18     |
| 838.57 | 1036.8    | 2.57     |
| 935.59 | 2068.9    | 5.14     |
| 936.59 | 972.3     | 2.41     |

|         |       |         |        |
|---------|-------|---------|--------|
| 937.60  | 290.9 | 0.72    |        |
| 983.67  | 376.8 | 0.94    |        |
| 1079.63 |       | 1222.4  | 3.03   |
| 1080.64 |       | 671.8   | 1.67   |
| 1135.61 |       | 241.2   | 0.60   |
| 1167.63 |       | 356.6   | 0.89   |
| 1187.77 |       | 40287.7 | 100.00 |
| 1188.77 |       | 24538.0 | 60.91  |
| 1189.78 |       | 9010.4  | 22.37  |
| 1190.79 |       | 2097.9  | 5.21   |
| 1593.95 |       | 273.3   | 0.68   |
| 1651.08 |       | 411.4   | 1.02   |
| 1652.08 |       | 384.7   | 0.95   |

SPECTRUM - MS

7-1-13\_HMG14\_837\_MS3\_935\_01.raw

ITMS + p ESI E Full ms3 838.00@cid35.00 936.00@cid35.00 [255.00-1000.00]

Scan #: 1-20

RT: 0.00-1.20

AV: 20

m/z Intensity Relative

|        |       |        |
|--------|-------|--------|
| 268.07 | 0.9   | 0.13   |
| 315.27 | 3.6   | 0.57   |
| 329.28 | 3.1   | 0.49   |
| 398.37 | 0.8   | 0.13   |
| 430.25 | 2.7   | 0.42   |
| 440.25 | 2.3   | 0.37   |
| 440.40 | 2.8   | 0.44   |
| 444.32 | 13.4  | 2.11   |
| 445.23 | 1.6   | 0.26   |
| 445.38 | 1.0   | 0.16   |
| 454.17 | 1.2   | 0.18   |
| 454.34 | 2.7   | 0.43   |
| 472.30 | 636.7 | 100.00 |
| 473.32 | 101.9 | 16.01  |
| 474.35 | 4.2   | 0.66   |
| 486.33 | 404.4 | 63.51  |
| 487.35 | 70.6  | 11.09  |
| 488.34 | 2.0   | 0.32   |
| 625.42 | 1.1   | 0.17   |
| 690.42 | 1.8   | 0.28   |
| 690.75 | 1.1   | 0.17   |
| 691.59 | 1.1   | 0.17   |
| 699.46 | 5.3   | 0.83   |
| 700.33 | 1.5   | 0.23   |
| 708.48 | 2.2   | 0.34   |
| 717.44 | 2.7   | 0.42   |
| 718.46 | 1.1   | 0.17   |
| 737.57 | 0.9   | 0.14   |
| 738.68 | 1.0   | 0.16   |



|        |       |       |
|--------|-------|-------|
| 739.60 | 1.9   | 0.30  |
| 764.37 | 0.8   | 0.13  |
| 778.52 | 10.8  | 1.69  |
| 779.48 | 2.1   | 0.33  |
| 780.69 | 0.8   | 0.13  |
| 861.72 | 1.1   | 0.17  |
| 864.65 | 1.3   | 0.21  |
| 893.27 | 0.8   | 0.13  |
| 893.65 | 4.3   | 0.67  |
| 894.61 | 1.5   | 0.23  |
| 903.49 | 4.2   | 0.66  |
| 903.64 | 4.2   | 0.66  |
| 904.52 | 2.0   | 0.32  |
| 905.49 | 4.0   | 0.63  |
| 905.68 | 2.5   | 0.39  |
| 906.37 | 1.8   | 0.29  |
| 906.60 | 1.8   | 0.28  |
| 935.56 | 105.8 | 16.62 |
| 936.59 | 43.2  | 6.78  |
| 937.58 | 2.3   | 0.36  |
| 937.78 | 0.9   | 0.15  |

SPECTRUM - MS

7-1-13\_HMG14\_837\_MS4\_935\_486\_01.raw

ITMS + p ESI E Full ms4 838.00@cid35.00 936.00@cid35.00 487.00@cid35.00 [130.00-500.00]

Scan #: 1-50

RT: 0.00-3.15

AV: 50

| m/z    | Intensity | Relative |
|--------|-----------|----------|
| 138.18 | 0.1       | 0.14     |
| 180.04 | 0.2       | 0.33     |
| 211.09 | 0.1       | 0.19     |
| 213.08 | 0.1       | 0.15     |
| 220.08 | 1.4       | 2.18     |
| 221.06 | 0.1       | 0.13     |
| 222.17 | 0.1       | 0.12     |
| 227.13 | 0.3       | 0.44     |
| 236.10 | 0.1       | 0.15     |
| 241.12 | 1.9       | 2.92     |
| 242.13 | 0.2       | 0.29     |
| 250.05 | 0.1       | 0.17     |
| 257.09 | 0.1       | 0.13     |
| 259.12 | 10.3      | 16.11    |
| 260.21 | 0.3       | 0.52     |
| 268.16 | 4.8       | 7.58     |
| 269.16 | 0.6       | 1.00     |
| 296.18 | 0.1       | 0.15     |
| 297.24 | 0.2       | 0.28     |
| 301.13 | 0.8       | 1.31     |
| 315.01 | 0.1       | 0.16     |

|        |      |        |
|--------|------|--------|
| 315.17 | 0.1  | 0.18   |
| 321.15 | 0.1  | 0.13   |
| 329.22 | 15.7 | 24.61  |
| 330.23 | 2.3  | 3.62   |
| 339.19 | 0.1  | 0.16   |
| 382.17 | 0.1  | 0.13   |
| 382.31 | 0.1  | 0.16   |
| 394.38 | 0.1  | 0.15   |
| 395.24 | 0.2  | 0.24   |
| 396.27 | 0.1  | 0.17   |
| 396.48 | 0.1  | 0.14   |
| 410.36 | 0.1  | 0.12   |
| 412.17 | 0.5  | 0.83   |
| 412.34 | 0.8  | 1.33   |
| 413.25 | 0.2  | 0.24   |
| 415.31 | 0.6  | 0.99   |
| 416.31 | 0.1  | 0.20   |
| 431.17 | 0.1  | 0.14   |
| 440.22 | 0.1  | 0.22   |
| 440.35 | 0.1  | 0.22   |
| 444.30 | 63.8 | 100.00 |
| 445.30 | 9.9  | 15.47  |
| 454.16 | 0.3  | 0.43   |
| 454.35 | 0.5  | 0.82   |
| 455.09 | 0.1  | 0.17   |
| 456.32 | 2.3  | 3.68   |
| 457.40 | 0.2  | 0.33   |
| 486.33 | 8.0  | 12.61  |
| 487.34 | 1.3  | 2.09   |

SPECTRUM - MS

7-1-13\_HMG14\_837\_MS4\_935\_472\_01.raw

ITMS + p ESI E Full ms4 838.00@cid35.00 936.00@cid35.00 473.00@cid35.00 [130.00-500.00]

Scan #: 1-50

RT: 0.00-3.06

AV: 50

m/z      Intensity      Relative

|        |      |       |
|--------|------|-------|
| 149.04 | 0.8  | 2.41  |
| 171.04 | 0.8  | 2.46  |
| 180.04 | 1.4  | 4.16  |
| 188.06 | 0.4  | 1.26  |
| 194.07 | 1.1  | 3.36  |
| 195.06 | 0.3  | 0.85  |
| 199.06 | 0.3  | 0.78  |
| 204.04 | 2.3  | 7.08  |
| 210.02 | 0.2  | 0.74  |
| 218.08 | 0.4  | 1.28  |
| 220.10 | 4.2  | 12.65 |
| 221.06 | 0.3  | 0.98  |
| 227.10 | 22.4 | 68.20 |

|        |      |        |
|--------|------|--------|
| 228.04 | 0.9  | 2.66   |
| 228.20 | 1.0  | 3.18   |
| 236.12 | 7.1  | 21.74  |
| 237.05 | 0.4  | 1.10   |
| 243.10 | 0.5  | 1.52   |
| 243.26 | 0.3  | 0.84   |
| 245.10 | 10.7 | 32.42  |
| 246.09 | 0.8  | 2.37   |
| 250.12 | 0.6  | 1.71   |
| 268.15 | 32.9 | 100.00 |
| 269.15 | 3.0  | 9.27   |
| 287.19 | 0.6  | 1.92   |
| 288.17 | 0.3  | 0.89   |
| 301.27 | 0.2  | 0.70   |
| 315.20 | 26.5 | 80.62  |
| 316.20 | 2.5  | 7.63   |
| 324.16 | 0.3  | 0.90   |
| 353.24 | 0.3  | 1.01   |
| 366.25 | 0.4  | 1.19   |
| 367.07 | 0.2  | 0.73   |
| 367.21 | 0.3  | 0.98   |
| 368.29 | 0.3  | 0.89   |
| 380.24 | 2.1  | 6.36   |
| 381.24 | 0.4  | 1.32   |
| 398.25 | 4.3  | 13.15  |
| 399.22 | 1.4  | 4.36   |
| 401.18 | 0.3  | 0.82   |
| 408.26 | 0.5  | 1.52   |
| 430.33 | 2.3  | 6.88   |
| 431.20 | 0.2  | 0.75   |
| 431.35 | 0.2  | 0.73   |
| 440.27 | 10.9 | 33.26  |
| 441.23 | 1.3  | 3.85   |
| 442.28 | 3.4  | 10.23  |
| 443.20 | 0.3  | 0.86   |
| 472.30 | 14.6 | 44.56  |
| 473.30 | 2.4  | 7.45   |

HMG 16 peak lists

SPECTRUM - MS

10-9-13\_HMG16\_837\_MS2\_01.raw

ITMS + p ESI E Full ms2 837.80@cid35.00 [230.00-2000.00]

Scan #: 1-20

RT: 0.00-1.75

AV: 20

| m/z     | Intensity | Relative |
|---------|-----------|----------|
| 420.17  | 329.2     | 2.17     |
| 444.27  | 701.5     | 4.63     |
| 464.21  | 606.1     | 4.00     |
| 486.28  | 12974.4   | 85.64    |
| 487.28  | 2894.9    | 19.11    |
| 488.29  | 571.2     | 3.77     |
| 514.29  | 275.8     | 1.82     |
| 534.33  | 194.4     | 1.28     |
| 605.34  | 5145.3    | 33.96    |
| 605.85  | 3231.1    | 21.33    |
| 606.35  | 1363.7    | 9.00     |
| 606.86  | 442.8     | 2.92     |
| 616.29  | 206.9     | 1.37     |
| 664.40  | 622.9     | 4.11     |
| 665.38  | 230.1     | 1.52     |
| 704.35  | 876.1     | 5.78     |
| 705.33  | 304.0     | 2.01     |
| 706.39  | 2176.8    | 14.37    |
| 707.40  | 777.1     | 5.13     |
| 708.41  | 196.3     | 1.30     |
| 718.46  | 507.0     | 3.35     |
| 720.46  | 886.9     | 5.85     |
| 722.44  | 271.4     | 1.79     |
| 724.42  | 1331.6    | 8.79     |
| 725.40  | 510.9     | 3.37     |
| 727.91  | 281.3     | 1.86     |
| 728.40  | 231.6     | 1.53     |
| 746.32  | 748.6     | 4.94     |
| 747.32  | 272.6     | 1.80     |
| 778.42  | 969.9     | 6.40     |
| 780.38  | 352.2     | 2.32     |
| 836.38  | 243.6     | 1.61     |
| 837.00  | 2550.9    | 16.84    |
| 837.46  | 2226.0    | 14.69    |
| 837.95  | 1187.9    | 7.84     |
| 838.43  | 619.4     | 4.09     |
| 838.94  | 189.9     | 1.25     |
| 1079.48 | 1069.9    | 7.06     |
| 1080.49 | 558.0     | 3.68     |
| 1081.50 | 198.7     | 1.31     |
| 1167.45 | 320.1     | 2.11     |

|         |         |        |
|---------|---------|--------|
| 1187.61 | 15149.8 | 100.00 |
| 1188.61 | 9062.2  | 59.82  |
| 1189.61 | 3396.0  | 22.42  |
| 1190.62 | 921.4   | 6.08   |
| 1209.49 | 501.5   | 3.31   |
| 1210.51 | 277.4   | 1.83   |
| 1650.85 | 575.1   | 3.80   |
| 1651.86 | 497.4   | 3.28   |
| 1652.87 | 266.3   | 1.76   |

SPECTRUM - MS

10-9-13\_HMG16\_837\_MS3\_605\_01.raw

ITMS + p ESI E Full ms3 837.80@cid35.00 606.00@cid35.00 [165.00-1200.00]

Scan #: 1-50

RT: 0.00-4.82

AV: 50

m/z Intensity Relative

|        |       |       |
|--------|-------|-------|
| 196.09 | 62.7  | 5.97  |
| 386.18 | 42.2  | 4.02  |
| 387.18 | 8.2   | 0.78  |
| 418.17 | 10.0  | 0.96  |
| 432.14 | 26.0  | 2.48  |
| 464.21 | 89.1  | 8.50  |
| 465.21 | 18.0  | 1.72  |
| 474.31 | 9.1   | 0.87  |
| 484.29 | 17.4  | 1.65  |
| 486.28 | 562.6 | 53.63 |
| 487.28 | 124.1 | 11.82 |
| 488.30 | 24.1  | 2.29  |
| 496.28 | 10.4  | 0.99  |
| 514.29 | 46.8  | 4.47  |
| 515.29 | 11.5  | 1.10  |
| 534.34 | 84.7  | 8.07  |
| 535.34 | 22.4  | 2.13  |
| 546.32 | 11.5  | 1.09  |
| 555.84 | 9.2   | 0.88  |
| 556.28 | 12.4  | 1.18  |
| 568.29 | 24.3  | 2.31  |
| 589.35 | 13.0  | 1.24  |
| 590.35 | 56.3  | 5.36  |
| 590.86 | 13.9  | 1.33  |
| 591.34 | 14.6  | 1.39  |
| 605.36 | 130.7 | 12.46 |
| 605.84 | 80.4  | 7.66  |
| 606.34 | 33.6  | 3.20  |
| 606.86 | 10.2  | 0.97  |
| 616.30 | 67.9  | 6.47  |
| 617.31 | 19.4  | 1.85  |
| 664.41 | 41.5  | 3.96  |
| 665.39 | 13.7  | 1.30  |

|         |       |        |        |
|---------|-------|--------|--------|
| 676.35  | 53.9  | 5.14   |        |
| 677.36  | 15.7  | 1.50   |        |
| 704.36  | 212.5 | 20.25  |        |
| 705.34  | 67.9  | 6.47   |        |
| 706.36  | 16.0  | 1.52   |        |
| 714.26  | 17.6  | 1.68   |        |
| 724.43  | 719.4 | 68.57  |        |
| 725.41  | 250.8 | 23.90  |        |
| 726.42  | 57.0  | 5.43   |        |
| 746.33  | 340.6 | 32.47  |        |
| 747.33  | 112.8 | 10.76  |        |
| 748.34  | 24.3  | 2.31   |        |
| 969.53  | 14.3  | 1.36   |        |
| 1187.63 |       | 1049.1 | 100.00 |
| 1188.64 |       | 608.6  | 58.02  |
| 1189.64 |       | 217.3  | 20.71  |
| 1190.65 |       | 50.6   | 4.82   |

SPECTRUM - MS

10-9-13\_HMG16\_837\_MS4\_605\_486\_01.raw

ITMS + p ESI E Full ms4 837.80@cid35.00 606.00@cid35.00 487.00@cid35.00 [130.00-500.00]

Scan #: 1-50

RT: 0.00-4.17

AV: 50

m/z Intensity Relative

|        |      |       |
|--------|------|-------|
| 180.09 | 0.2  | 0.22  |
| 220.07 | 1.6  | 1.47  |
| 221.12 | 0.2  | 0.15  |
| 227.05 | 0.4  | 0.33  |
| 241.11 | 2.8  | 2.56  |
| 242.11 | 0.3  | 0.26  |
| 257.07 | 0.2  | 0.19  |
| 259.11 | 11.2 | 10.11 |
| 260.11 | 1.1  | 0.95  |
| 268.12 | 5.7  | 5.14  |
| 269.13 | 0.6  | 0.59  |
| 297.18 | 0.4  | 0.33  |
| 301.14 | 0.6  | 0.53  |
| 314.18 | 0.3  | 0.27  |
| 315.20 | 0.2  | 0.19  |
| 329.18 | 19.4 | 17.54 |
| 330.19 | 2.7  | 2.42  |
| 331.23 | 0.3  | 0.23  |
| 353.25 | 0.3  | 0.27  |
| 368.72 | 0.7  | 0.65  |
| 369.08 | 0.7  | 0.62  |
| 370.72 | 0.8  | 0.69  |
| 371.09 | 1.0  | 0.92  |
| 387.23 | 0.2  | 0.16  |
| 394.24 | 0.2  | 0.20  |

|        |       |        |
|--------|-------|--------|
| 410.24 | 0.4   | 0.34   |
| 412.21 | 1.5   | 1.39   |
| 413.27 | 0.2   | 0.20   |
| 415.24 | 1.9   | 1.69   |
| 416.32 | 0.2   | 0.15   |
| 426.22 | 0.3   | 0.26   |
| 426.39 | 0.2   | 0.18   |
| 426.90 | 0.2   | 0.17   |
| 427.34 | 0.2   | 0.15   |
| 428.75 | 0.7   | 0.59   |
| 429.07 | 0.9   | 0.77   |
| 429.94 | 0.2   | 0.15   |
| 431.20 | 0.3   | 0.25   |
| 440.25 | 0.2   | 0.16   |
| 444.26 | 110.6 | 100.00 |
| 445.27 | 21.0  | 19.01  |
| 446.25 | 3.2   | 2.92   |
| 454.28 | 1.0   | 0.90   |
| 455.26 | 0.3   | 0.24   |
| 456.27 | 4.3   | 3.90   |
| 457.29 | 0.8   | 0.75   |
| 458.30 | 0.2   | 0.15   |
| 486.27 | 10.8  | 9.74   |
| 487.27 | 2.2   | 2.03   |
| 488.27 | 0.4   | 0.34   |

SPECTRUM - MS

10-9-13\_HMG16\_837\_MS3\_486\_01.raw

ITMS + p ESI E Full ms3 837.80@cid35.00 487.00@cid35.00 [130.00-500.00]

Scan #: 1-50

RT: 0.00-2.47

AV: 50

m/z Intensity Relative

|        |       |      |
|--------|-------|------|
| 180.03 | 6.6   | 0.20 |
| 188.03 | 3.6   | 0.11 |
| 211.07 | 3.8   | 0.12 |
| 213.07 | 4.1   | 0.13 |
| 218.05 | 3.1   | 0.09 |
| 220.07 | 36.8  | 1.13 |
| 221.08 | 4.1   | 0.13 |
| 227.05 | 6.3   | 0.19 |
| 236.08 | 3.5   | 0.11 |
| 241.09 | 65.2  | 2.00 |
| 242.10 | 5.8   | 0.18 |
| 257.07 | 4.8   | 0.15 |
| 259.10 | 249.7 | 7.67 |
| 260.11 | 22.7  | 0.70 |
| 261.12 | 3.9   | 0.12 |
| 268.12 | 113.8 | 3.49 |
| 269.13 | 12.3  | 0.38 |

|        |        |       |        |
|--------|--------|-------|--------|
| 297.13 | 10.9   | 0.33  |        |
| 301.11 | 12.8   | 0.39  |        |
| 329.18 | 354.6  | 10.88 |        |
| 330.19 | 54.3   | 1.67  |        |
| 331.16 | 7.2    | 0.22  |        |
| 352.18 | 2.6    | 0.08  |        |
| 353.17 | 16.2   | 0.50  |        |
| 354.18 | 2.8    | 0.09  |        |
| 371.11 | 4.2    | 0.13  |        |
| 380.18 | 6.9    | 0.21  |        |
| 382.22 | 4.0    | 0.12  |        |
| 384.20 | 3.8    | 0.12  |        |
| 394.20 | 4.4    | 0.13  |        |
| 410.20 | 9.4    | 0.29  |        |
| 412.20 | 48.2   | 1.48  |        |
| 413.21 | 10.8   | 0.33  |        |
| 414.23 | 2.4    | 0.07  |        |
| 415.24 | 54.7   | 1.68  |        |
| 416.23 | 10.3   | 0.32  |        |
| 426.26 | 3.9    | 0.12  |        |
| 431.25 | 4.3    | 0.13  |        |
| 440.15 | 3.9    | 0.12  |        |
| 440.31 | 2.7    | 0.08  |        |
| 444.26 | 3257.7 |       | 100.00 |
| 445.26 | 638.8  | 19.61 |        |
| 446.25 | 100.6  | 3.09  |        |
| 454.24 | 14.0   | 0.43  |        |
| 456.25 | 52.4   | 1.61  |        |
| 457.24 | 11.8   | 0.36  |        |
| 458.22 | 2.4    | 0.07  |        |
| 486.26 | 275.6  | 8.46  |        |
| 487.27 | 62.8   | 1.93  |        |
| 488.28 | 10.3   | 0.32  |        |



HMG 18 Mass spectral peak lists

SPECTRUM - MS

10-9-13\_HMG18\_837\_MS2\_01.raw

ITMS + p ESI E Full ms2 837.80@cid35.00 [230.00-2000.00]

Scan #: 1-20

RT: 0.00-1.71

AV: 20

| m/z     | Intensity | Relative |       |
|---------|-----------|----------|-------|
| 329.18  | 353.9     | 0.76     |       |
| 406.15  | 524.2     | 1.12     |       |
| 444.26  | 1537.0    |          | 3.29  |
| 445.27  | 331.5     | 0.71     |       |
| 454.24  | 277.0     | 0.59     |       |
| 464.20  | 317.6     | 0.68     |       |
| 472.25  | 1413.1    |          | 3.02  |
| 473.26  | 341.8     | 0.73     |       |
| 486.27  | 41367.5   |          | 88.43 |
| 487.28  | 9517.1    |          | 20.34 |
| 488.28  | 1802.9    |          | 3.85  |
| 534.32  | 400.4     | 0.86     |       |
| 605.33  | 5801.3    |          | 12.40 |
| 605.85  | 3770.1    |          | 8.06  |
| 606.34  | 1584.2    |          | 3.39  |
| 606.83  | 553.0     | 1.18     |       |
| 630.30  | 387.0     | 0.83     |       |
| 718.37  | 1143.9    |          | 2.45  |
| 719.34  | 318.6     | 0.68     |       |
| 720.45  | 1027.4    |          | 2.20  |
| 738.42  | 9968.2    |          | 21.31 |
| 739.42  | 3869.5    |          | 8.27  |
| 740.43  | 1022.7    |          | 2.19  |
| 760.34  | 534.7     | 1.14     |       |
| 778.39  | 753.3     | 1.61     |       |
| 780.34  | 314.7     | 0.67     |       |
| 820.93  | 575.6     | 1.23     |       |
| 821.43  | 519.4     | 1.11     |       |
| 821.95  | 468.6     | 1.00     |       |
| 836.37  | 274.8     | 0.59     |       |
| 837.01  | 6761.6    |          | 14.45 |
| 837.47  | 5908.7    |          | 12.63 |
| 837.96  | 3188.1    |          | 6.81  |
| 838.45  | 1349.3    |          | 2.88  |
| 838.95  | 425.3     | 0.91     |       |
| 935.45  | 2422.6    |          | 5.18  |
| 936.46  | 1112.7    |          | 2.38  |
| 937.46  | 331.4     | 0.71     |       |
| 983.53  | 470.1     | 1.00     |       |
| 1079.47 |           | 1445.7   | 3.09  |
| 1080.49 |           | 757.7    | 1.62  |

|         |         |        |
|---------|---------|--------|
| 1135.44 | 295.1   | 0.63   |
| 1167.46 | 401.1   | 0.86   |
| 1187.61 | 46780.9 | 100.00 |
| 1188.61 | 27865.4 | 59.57  |
| 1189.61 | 10347.6 | 22.12  |
| 1190.62 | 2741.2  | 5.86   |
| 1191.61 | 524.0   | 1.12   |
| 1650.84 | 516.3   | 1.10   |
| 1651.84 | 421.3   | 0.90   |

SPECTRUM - MS

10-9-13\_HMG18\_837\_MS3\_935\_01.raw

ITMS + p ESI E Full ms3 837.80@cid35.00 936.00@cid35.00 [255.00-1000.00]

Scan #: 1-20

RT: 0.00-1.14

AV: 20

m/z Intensity Relative

|        |       |        |
|--------|-------|--------|
| 268.11 | 1.3   | 0.20   |
| 315.19 | 2.4   | 0.36   |
| 329.19 | 3.3   | 0.49   |
| 430.23 | 2.3   | 0.34   |
| 430.38 | 1.1   | 0.16   |
| 440.28 | 4.1   | 0.61   |
| 444.33 | 8.2   | 1.22   |
| 445.15 | 2.5   | 0.37   |
| 454.21 | 2.5   | 0.38   |
| 454.36 | 0.9   | 0.13   |
| 455.29 | 1.0   | 0.15   |
| 472.23 | 674.8 | 100.00 |
| 473.24 | 123.1 | 18.24  |
| 474.01 | 1.9   | 0.28   |
| 474.22 | 9.1   | 1.34   |
| 474.37 | 4.0   | 0.60   |
| 486.26 | 423.7 | 62.79  |
| 487.27 | 82.5  | 12.23  |
| 488.32 | 8.2   | 1.21   |
| 504.21 | 1.0   | 0.15   |
| 690.32 | 0.9   | 0.14   |
| 690.49 | 1.0   | 0.14   |
| 691.06 | 1.0   | 0.15   |
| 691.27 | 1.0   | 0.14   |
| 699.56 | 1.0   | 0.15   |
| 708.29 | 1.5   | 0.22   |
| 717.29 | 5.6   | 0.82   |
| 738.38 | 0.9   | 0.13   |
| 766.42 | 1.7   | 0.25   |
| 778.47 | 8.0   | 1.19   |
| 779.44 | 3.2   | 0.48   |
| 829.33 | 1.8   | 0.26   |
| 830.50 | 1.0   | 0.14   |

|        |       |       |
|--------|-------|-------|
| 864.47 | 1.8   | 0.27  |
| 888.29 | 0.9   | 0.13  |
| 893.59 | 4.8   | 0.71  |
| 894.51 | 3.6   | 0.54  |
| 903.49 | 2.8   | 0.41  |
| 903.61 | 1.5   | 0.23  |
| 904.42 | 1.2   | 0.17  |
| 905.42 | 7.1   | 1.05  |
| 906.36 | 2.5   | 0.37  |
| 906.58 | 1.2   | 0.18  |
| 935.03 | 1.4   | 0.21  |
| 935.45 | 112.1 | 16.62 |
| 936.06 | 1.2   | 0.18  |
| 936.46 | 56.8  | 8.42  |
| 937.22 | 2.7   | 0.40  |
| 937.37 | 4.9   | 0.72  |
| 937.52 | 5.8   | 0.86  |

SPECTRUM - MS

10-9-13\_HMG18\_837\_MS4\_935\_486\_01.raw

ITMS + p ESI E Full ms4 837.80@cid35.00 936.00@cid35.00 487.00@cid35.00 [130.00-500.00]

Scan #: 1-50

RT: 0.00-3.20

AV: 50

| m/z    | Intensity | Relative |
|--------|-----------|----------|
| 180.06 | 0.1       | 0.16     |
| 188.01 | 0.2       | 0.30     |
| 213.05 | 0.2       | 0.27     |
| 220.07 | 1.8       | 2.26     |
| 221.06 | 0.3       | 0.33     |
| 221.21 | 0.1       | 0.12     |
| 227.12 | 0.1       | 0.18     |
| 236.15 | 0.1       | 0.12     |
| 241.10 | 2.1       | 2.65     |
| 242.11 | 0.2       | 0.29     |
| 250.06 | 0.1       | 0.16     |
| 257.14 | 0.3       | 0.35     |
| 259.09 | 9.0       | 11.26    |
| 260.08 | 0.9       | 1.11     |
| 266.02 | 0.1       | 0.16     |
| 268.12 | 6.1       | 7.63     |
| 269.12 | 0.8       | 1.02     |
| 297.13 | 0.2       | 0.30     |
| 301.17 | 0.4       | 0.56     |
| 315.10 | 0.1       | 0.12     |
| 329.17 | 18.4      | 23.14    |
| 330.17 | 2.4       | 3.06     |
| 331.20 | 0.1       | 0.13     |
| 339.06 | 0.1       | 0.12     |
| 352.16 | 0.1       | 0.12     |

|        |      |        |
|--------|------|--------|
| 353.16 | 0.3  | 0.38   |
| 366.29 | 0.2  | 0.25   |
| 380.16 | 0.2  | 0.21   |
| 384.13 | 0.1  | 0.13   |
| 384.29 | 0.2  | 0.19   |
| 394.20 | 0.1  | 0.15   |
| 412.18 | 0.9  | 1.14   |
| 412.38 | 0.4  | 0.54   |
| 413.12 | 0.1  | 0.13   |
| 415.25 | 1.0  | 1.27   |
| 416.32 | 0.1  | 0.18   |
| 426.20 | 0.1  | 0.16   |
| 440.08 | 0.2  | 0.24   |
| 444.24 | 79.6 | 100.00 |
| 445.25 | 12.9 | 16.18  |
| 446.30 | 0.8  | 0.96   |
| 454.21 | 0.3  | 0.37   |
| 454.33 | 0.2  | 0.24   |
| 456.23 | 2.0  | 2.55   |
| 457.24 | 0.4  | 0.47   |
| 458.26 | 0.1  | 0.15   |
| 486.23 | 9.8  | 12.28  |
| 487.04 | 0.2  | 0.21   |
| 487.29 | 0.9  | 1.17   |
| 488.29 | 0.1  | 0.17   |

SPECTRUM - MS

10-9-13\_HMG18\_837\_MS4\_935\_472\_02.raw

ITMS + p ESI E Full ms4 837.80@cid35.00 936.00@cid35.00 473.00@cid35.00 [130.00-500.00]

Scan #: 1-100

RT: 0.00-7.18

AV: 100

m/z Intensity Relative

|        |      |       |
|--------|------|-------|
| 148.97 | 1.1  | 2.95  |
| 171.00 | 0.9  | 2.57  |
| 180.03 | 1.3  | 3.54  |
| 188.02 | 0.7  | 1.95  |
| 194.04 | 1.2  | 3.23  |
| 203.98 | 2.4  | 6.69  |
| 210.05 | 0.2  | 0.68  |
| 218.04 | 0.5  | 1.40  |
| 220.06 | 4.4  | 11.97 |
| 221.08 | 0.4  | 1.10  |
| 227.07 | 25.7 | 70.31 |
| 228.07 | 1.8  | 4.97  |
| 232.05 | 0.4  | 0.99  |
| 236.05 | 7.6  | 20.91 |
| 237.03 | 0.6  | 1.54  |
| 243.07 | 0.5  | 1.49  |
| 245.07 | 12.5 | 34.38 |

|        |      |        |
|--------|------|--------|
| 246.07 | 1.0  | 2.87   |
| 250.09 | 0.6  | 1.61   |
| 268.11 | 36.5 | 100.00 |
| 269.11 | 3.6  | 9.84   |
| 287.10 | 1.4  | 3.82   |
| 301.12 | 0.2  | 0.61   |
| 315.14 | 30.6 | 83.88  |
| 316.15 | 3.2  | 8.90   |
| 317.17 | 0.4  | 0.96   |
| 324.12 | 0.7  | 1.91   |
| 325.13 | 0.3  | 0.84   |
| 327.18 | 0.2  | 0.64   |
| 339.14 | 0.3  | 0.75   |
| 353.14 | 0.2  | 0.62   |
| 366.16 | 0.5  | 1.38   |
| 367.15 | 0.8  | 2.20   |
| 368.16 | 0.7  | 2.00   |
| 380.19 | 2.4  | 6.45   |
| 381.20 | 0.3  | 0.87   |
| 385.15 | 0.5  | 1.30   |
| 396.18 | 0.2  | 0.62   |
| 398.17 | 5.0  | 13.75  |
| 399.18 | 2.0  | 5.49   |
| 401.20 | 0.6  | 1.59   |
| 408.18 | 0.8  | 2.15   |
| 430.24 | 2.4  | 6.66   |
| 431.19 | 0.3  | 0.94   |
| 440.18 | 12.6 | 34.62  |
| 441.19 | 2.1  | 5.62   |
| 442.21 | 4.3  | 11.69  |
| 443.23 | 0.8  | 2.09   |
| 472.23 | 8.7  | 23.79  |
| 473.25 | 1.6  | 4.48   |

HMG 20 MSn peak lists.

SPECTRUM - MS

8-12-13\_HMG20\_924\_MS2\_01.raw

ITMS + p ESI E Full ms2 924.60@cid35.00 [250.00-2000.00]

Scan #: 1-20

RT: 0.00-1.71

AV: 20

| m/z     | Intensity | Relative |
|---------|-----------|----------|
| 444.26  | 101.9     | 0.95     |
| 464.20  | 73.1      | 0.68     |
| 486.27  | 2486.0    | 23.27    |
| 487.28  | 536.8     | 5.02     |
| 514.28  | 87.8      | 0.82     |
| 534.33  | 272.1     | 2.55     |
| 535.33  | 75.0      | 0.70     |
| 589.35  | 349.8     | 3.27     |
| 589.85  | 240.7     | 2.25     |
| 590.36  | 110.7     | 1.04     |
| 598.32  | 69.0      | 0.65     |
| 616.29  | 83.2      | 0.78     |
| 660.36  | 910.2     | 8.52     |
| 661.37  | 282.4     | 2.64     |
| 664.40  | 124.3     | 1.16     |
| 692.39  | 10683.8   | 100.00   |
| 692.89  | 8213.2    | 76.88    |
| 693.39  | 2937.3    | 27.49    |
| 693.91  | 325.9     | 3.05     |
| 704.34  | 274.2     | 2.57     |
| 705.32  | 95.0      | 0.89     |
| 706.38  | 420.5     | 3.94     |
| 707.40  | 154.0     | 1.44     |
| 724.41  | 516.0     | 4.83     |
| 725.40  | 190.8     | 1.79     |
| 746.32  | 190.3     | 1.78     |
| 814.95  | 116.2     | 1.09     |
| 815.45  | 113.3     | 1.06     |
| 820.94  | 767.2     | 7.18     |
| 821.44  | 733.1     | 6.86     |
| 821.95  | 348.4     | 3.26     |
| 829.96  | 145.7     | 1.36     |
| 830.45  | 134.8     | 1.26     |
| 850.42  | 144.9     | 1.36     |
| 924.04  | 1400.9    | 13.11    |
| 924.51  | 1686.8    | 15.79    |
| 924.99  | 1029.2    | 9.63     |
| 925.49  | 154.1     | 1.44     |
| 1155.58 | 255.5     | 2.39     |
| 1156.60 | 169.3     | 1.58     |
| 1187.60 | 723.8     | 6.78     |

|         |        |      |       |
|---------|--------|------|-------|
| 1188.61 | 436.4  | 4.08 |       |
| 1189.61 | 130.0  | 1.22 |       |
| 1253.56 | 173.7  | 1.63 |       |
| 1254.58 | 104.7  | 0.98 |       |
| 1361.70 | 2983.3 |      | 27.92 |
| 1362.70 | 2198.8 |      | 20.58 |
| 1363.71 | 753.1  | 7.05 |       |
| 1825.02 | 69.3   | 0.65 |       |
| 1826.02 | 76.9   | 0.72 |       |

SPECTRUM - MS

8-12-13\_HMG20\_924\_MS3\_692\_01.raw

ITMS + p ESI E Full ms3 924.60@cid35.00 693.00@cid35.00 [190.00-1400.00]

Scan #: 1-50

RT: 0.00-4.02

AV: 50

m/z Intensity Relative

|        |       |        |
|--------|-------|--------|
| 386.16 | 49.6  | 5.15   |
| 472.23 | 68.1  | 7.08   |
| 486.28 | 56.9  | 5.92   |
| 514.26 | 83.2  | 8.65   |
| 534.31 | 717.1 | 74.55  |
| 535.32 | 181.7 | 18.89  |
| 536.33 | 28.8  | 3.00   |
| 552.30 | 36.1  | 3.76   |
| 589.34 | 961.9 | 100.00 |
| 589.84 | 561.8 | 58.41  |
| 590.33 | 289.7 | 30.12  |
| 590.84 | 57.8  | 6.01   |
| 591.33 | 35.4  | 3.68   |
| 598.31 | 194.8 | 20.25  |
| 598.82 | 112.0 | 11.65  |
| 599.31 | 43.8  | 4.55   |
| 616.27 | 103.5 | 10.76  |
| 617.29 | 28.5  | 2.96   |
| 642.86 | 95.7  | 9.95   |
| 643.36 | 58.1  | 6.04   |
| 644.32 | 59.5  | 6.19   |
| 660.34 | 382.9 | 39.81  |
| 661.35 | 104.4 | 10.85  |
| 664.39 | 36.5  | 3.80   |
| 676.38 | 34.6  | 3.60   |
| 692.37 | 205.3 | 21.35  |
| 692.88 | 150.0 | 15.59  |
| 693.38 | 59.0  | 6.13   |
| 704.34 | 80.5  | 8.37   |
| 720.34 | 84.3  | 8.77   |
| 724.40 | 567.2 | 58.97  |
| 725.39 | 194.4 | 20.21  |
| 726.39 | 38.2  | 3.97   |

|         |       |       |       |
|---------|-------|-------|-------|
| 746.31  | 98.5  | 10.24 |       |
| 747.31  | 32.0  | 3.32  |       |
| 748.38  | 46.1  | 4.79  |       |
| 794.37  | 79.7  | 8.29  |       |
| 850.41  | 369.0 | 38.37 |       |
| 851.41  | 140.4 | 14.59 |       |
| 852.39  | 35.5  | 3.69  |       |
| 1143.59 |       | 44.4  | 4.61  |
| 1155.57 |       | 228.1 | 23.72 |
| 1156.58 |       | 131.1 | 13.63 |
| 1157.59 |       | 47.7  | 4.96  |
| 1173.57 |       | 100.2 | 10.42 |
| 1174.57 |       | 54.7  | 5.68  |
| 1361.69 |       | 567.2 | 58.97 |
| 1362.69 |       | 377.1 | 39.20 |
| 1363.70 |       | 138.9 | 14.44 |
| 1364.71 |       | 29.7  | 3.09  |

SPECTRUM - MS

8-12-13\_HMG20\_924\_MS4\_692\_660\_01.raw

ITMS + p ESI E Full ms4 924.60@cid35.00 693.00@cid35.00 661.00@cid35.00 [180.00-700.00]

Scan #: 1-50

RT: 0.00-3.37

AV: 50

| m/z    | Intensity | Relative |
|--------|-----------|----------|
| 211.05 | 0.4       | 1.47     |
| 220.11 | 0.4       | 1.45     |
| 229.10 | 1.6       | 6.02     |
| 236.09 | 0.7       | 2.62     |
| 241.16 | 0.8       | 3.08     |
| 259.10 | 13.9      | 52.80    |
| 260.10 | 1.6       | 6.10     |
| 301.09 | 0.7       | 2.85     |
| 329.17 | 1.9       | 7.16     |
| 368.16 | 0.4       | 1.51     |
| 380.18 | 1.1       | 4.05     |
| 381.15 | 0.4       | 1.66     |
| 382.21 | 2.4       | 8.95     |
| 383.19 | 0.7       | 2.65     |
| 383.33 | 0.4       | 1.40     |
| 384.17 | 0.5       | 1.95     |
| 385.25 | 0.4       | 1.37     |
| 394.21 | 2.1       | 7.94     |
| 398.22 | 2.6       | 9.75     |
| 399.20 | 0.7       | 2.80     |
| 412.23 | 0.7       | 2.77     |
| 424.20 | 1.5       | 5.81     |
| 430.24 | 1.8       | 7.01     |
| 431.22 | 0.3       | 1.04     |
| 442.24 | 0.5       | 2.06     |



|        |      |        |
|--------|------|--------|
| 447.16 | 0.4  | 1.68   |
| 447.34 | 0.5  | 1.99   |
| 454.22 | 2.6  | 9.96   |
| 455.36 | 0.4  | 1.39   |
| 456.24 | 5.6  | 21.50  |
| 457.15 | 0.5  | 1.80   |
| 457.35 | 0.6  | 2.41   |
| 470.28 | 0.5  | 1.78   |
| 472.24 | 26.3 | 100.00 |
| 473.33 | 3.3  | 12.67  |
| 515.30 | 0.3  | 1.05   |
| 558.31 | 0.3  | 1.06   |
| 584.23 | 0.9  | 3.38   |
| 584.42 | 0.3  | 1.06   |
| 585.34 | 0.3  | 1.22   |
| 586.30 | 22.3 | 84.76  |
| 587.30 | 5.3  | 20.33  |
| 589.33 | 2.8  | 10.63  |
| 590.46 | 0.4  | 1.47   |
| 614.37 | 0.7  | 2.50   |
| 618.33 | 14.0 | 53.20  |
| 619.35 | 4.0  | 15.09  |
| 630.28 | 0.3  | 1.05   |
| 660.36 | 9.0  | 34.34  |
| 661.37 | 2.6  | 9.80   |

SPECTRUM - MS

8-12-13\_HMG20\_924\_MS3\_486\_01.raw

ITMS + p ESI E Full ms3 924.60@cid35.00 487.00@cid35.00 [130.00-500.00]

Scan #: 1-100

RT: 0.00-5.17

AV: 100

m/z      Intensity      Relative

|        |      |       |
|--------|------|-------|
| 180.01 | 2.4  | 0.37  |
| 188.03 | 1.4  | 0.21  |
| 194.03 | 0.9  | 0.13  |
| 211.05 | 1.1  | 0.17  |
| 213.06 | 0.8  | 0.13  |
| 218.06 | 0.7  | 0.11  |
| 220.06 | 13.1 | 1.99  |
| 221.08 | 1.2  | 0.18  |
| 227.05 | 2.4  | 0.36  |
| 236.06 | 0.9  | 0.14  |
| 241.09 | 17.4 | 2.65  |
| 242.10 | 1.8  | 0.27  |
| 250.09 | 0.7  | 0.11  |
| 257.07 | 1.1  | 0.17  |
| 259.09 | 70.6 | 10.72 |
| 260.10 | 6.4  | 0.97  |
| 268.11 | 40.7 | 6.18  |

|        |       |        |
|--------|-------|--------|
| 269.11 | 3.9   | 0.59   |
| 297.12 | 3.3   | 0.50   |
| 298.09 | 0.6   | 0.10   |
| 301.11 | 3.9   | 0.60   |
| 312.14 | 0.7   | 0.11   |
| 314.15 | 1.5   | 0.22   |
| 315.14 | 0.9   | 0.13   |
| 326.17 | 0.7   | 0.10   |
| 329.17 | 129.4 | 19.66  |
| 330.17 | 15.8  | 2.41   |
| 353.10 | 1.5   | 0.23   |
| 353.27 | 1.2   | 0.18   |
| 380.19 | 1.1   | 0.16   |
| 382.23 | 1.2   | 0.18   |
| 384.22 | 1.0   | 0.16   |
| 387.17 | 1.2   | 0.18   |
| 394.19 | 1.7   | 0.25   |
| 410.23 | 2.3   | 0.35   |
| 412.19 | 10.8  | 1.64   |
| 413.18 | 2.0   | 0.31   |
| 415.22 | 11.6  | 1.76   |
| 416.22 | 2.4   | 0.36   |
| 426.23 | 2.5   | 0.38   |
| 431.21 | 1.1   | 0.17   |
| 440.20 | 1.1   | 0.17   |
| 444.24 | 658.0 | 100.00 |
| 445.24 | 120.2 | 18.27  |
| 454.22 | 5.9   | 0.89   |
| 455.33 | 0.9   | 0.13   |
| 456.25 | 27.8  | 4.23   |
| 457.26 | 6.8   | 1.04   |
| 486.25 | 47.1  | 7.15   |
| 487.26 | 9.2   | 1.40   |

HMG 21 Mass spectral peak lists

SPECTRUM - MS

7-2-13\_HMG21\_924\_MS2\_01.raw

ITMS + p ESI E Full ms2 924.60@cid35.00 [250.00-2000.00]

Scan #: 1-20

RT: 0.00-1.56

AV: 20

| m/z     | Intensity | Relative |
|---------|-----------|----------|
| 406.18  | 1924.3    | 1.76     |
| 472.29  | 7434.4    | 6.81     |
| 534.38  | 7187.9    | 6.59     |
| 535.38  | 1943.2    | 1.78     |
| 586.34  | 2906.1    | 2.66     |
| 605.39  | 2239.7    | 2.05     |
| 660.41  | 84872.7   | 77.76    |
| 661.42  | 25907.4   | 23.74    |
| 662.42  | 5527.0    | 5.06     |
| 738.48  | 108195.9  | 99.13    |
| 739.49  | 40596.7   | 37.20    |
| 740.49  | 9493.6    | 8.70     |
| 768.98  | 9886.5    | 9.06     |
| 769.49  | 7737.9    | 7.09     |
| 769.98  | 3642.1    | 3.34     |
| 784.51  | 1679.5    | 1.54     |
| 806.00  | 38826.5   | 35.57    |
| 806.50  | 32070.6   | 29.38    |
| 807.00  | 15813.8   | 14.49    |
| 807.50  | 5786.5    | 5.30     |
| 821.02  | 51053.2   | 46.78    |
| 821.52  | 42881.9   | 39.29    |
| 822.03  | 20626.2   | 18.90    |
| 822.54  | 7254.9    | 6.65     |
| 830.02  | 4451.8    | 4.08     |
| 830.53  | 3961.3    | 3.63     |
| 831.02  | 1859.7    | 1.70     |
| 873.49  | 4348.2    | 3.98     |
| 874.52  | 5167.2    | 4.73     |
| 875.03  | 2789.0    | 2.56     |
| 875.53  | 2016.1    | 1.85     |
| 903.53  | 2262.0    | 2.07     |
| 908.05  | 2390.3    | 2.19     |
| 908.55  | 2413.0    | 2.21     |
| 924.11  | 29149.4   | 26.71    |
| 924.59  | 28105.8   | 25.75    |
| 925.07  | 15030.9   | 13.77    |
| 925.56  | 6877.8    | 6.30     |
| 1079.55 | 5456.4    | 5.00     |
| 1080.57 | 2665.1    | 2.44     |
| 1109.61 | 40471.2   | 37.08    |

|         |          |        |
|---------|----------|--------|
| 1110.61 | 20946.3  | 19.19  |
| 1111.62 | 6740.0   | 6.18   |
| 1187.69 | 109141.9 | 100.00 |
| 1188.69 | 62386.2  | 57.16  |
| 1189.70 | 22634.9  | 20.74  |
| 1190.70 | 5181.6   | 4.75   |
| 1588.90 | 12621.6  | 11.56  |
| 1589.91 | 10046.7  | 9.21   |
| 1590.92 | 4808.1   | 4.41   |

SPECTRUM - MS

7-2-13\_HMG21\_924\_MS3\_1109\_01.raw

ITMS + p ESI E Full ms3 924.60@cid35.00 1110.00@cid35.00 [305.00-1200.00]

Scan #: 1-20

RT: 0.00-2.21

AV: 20

m/z Intensity Relative

|        |        |        |
|--------|--------|--------|
| 398.20 | 2.3    | 0.17   |
| 424.23 | 13.3   | 0.99   |
| 430.27 | 3.0    | 0.22   |
| 440.23 | 2.8    | 0.21   |
| 442.29 | 4.4    | 0.33   |
| 454.28 | 8.5    | 0.64   |
| 456.28 | 2.6    | 0.19   |
| 472.28 | 697.6  | 51.98  |
| 473.29 | 113.5  | 8.46   |
| 474.30 | 13.0   | 0.97   |
| 586.34 | 21.1   | 1.57   |
| 587.28 | 2.3    | 0.17   |
| 587.44 | 2.7    | 0.20   |
| 611.37 | 3.6    | 0.27   |
| 618.38 | 7.8    | 0.58   |
| 632.38 | 2.7    | 0.20   |
| 660.40 | 1341.9 | 100.00 |
| 661.41 | 333.8  | 24.87  |
| 662.42 | 42.4   | 3.16   |
| 667.37 | 8.7    | 0.65   |
| 716.43 | 3.6    | 0.27   |
| 799.43 | 129.8  | 9.67   |
| 800.44 | 40.8   | 3.04   |
| 801.49 | 7.5    | 0.56   |
| 829.44 | 13.6   | 1.02   |
| 830.50 | 3.8    | 0.28   |
| 831.43 | 3.4    | 0.25   |
| 831.60 | 3.0    | 0.22   |
| 864.58 | 3.3    | 0.24   |
| 873.49 | 875.1  | 65.22  |
| 874.50 | 305.3  | 22.75  |
| 875.52 | 53.6   | 3.99   |
| 882.54 | 5.2    | 0.38   |

|         |       |             |
|---------|-------|-------------|
| 883.50  | 2.3   | 0.17        |
| 891.50  | 4.6   | 0.34        |
| 903.53  | 248.9 | 18.55       |
| 904.53  | 88.1  | 6.57        |
| 905.52  | 21.5  | 1.60        |
| 921.52  | 7.5   | 0.56        |
| 952.51  | 32.3  | 2.41        |
| 953.61  | 10.9  | 0.82        |
| 954.54  | 2.5   | 0.19        |
| 1067.52 |       | 6.8 0.51    |
| 1067.73 |       | 5.2 0.39    |
| 1068.60 |       | 6.3 0.47    |
| 1079.56 |       | 8.4 0.63    |
| 1080.57 |       | 2.3 0.17    |
| 1109.62 |       | 510.0 38.00 |
| 1110.61 |       | 271.9 20.26 |
| 1111.62 |       | 83.1 6.20   |

SPECTRUM - MS

7-2-13\_HMG21\_924\_MS4\_1109\_660\_01.raw

ITMS + p ESI E Full ms4 924.60@cid35.00 1110.00@cid35.00 661.00@cid35.00 [180.00-700.00]

Scan #: 1-50

RT: 0.00-6.22

AV: 50

| m/z    | Intensity | Relative |
|--------|-----------|----------|
| 229.11 | 23.9      | 6.15     |
| 236.09 | 15.3      | 3.92     |
| 241.13 | 16.6      | 4.25     |
| 259.13 | 330.7     | 84.89    |
| 260.13 | 22.5      | 5.78     |
| 301.15 | 7.3       | 1.87     |
| 329.21 | 9.8       | 2.53     |
| 355.22 | 6.6       | 1.70     |
| 364.23 | 13.0      | 3.33     |
| 368.22 | 6.6       | 1.69     |
| 380.22 | 9.6       | 2.46     |
| 382.24 | 21.6      | 5.56     |
| 384.23 | 9.9       | 2.53     |
| 385.23 | 5.8       | 1.48     |
| 394.26 | 9.4       | 2.41     |
| 398.23 | 16.0      | 4.11     |
| 399.23 | 9.8       | 2.53     |
| 400.25 | 5.8       | 1.49     |
| 412.25 | 21.5      | 5.53     |
| 424.23 | 24.8      | 6.37     |
| 426.26 | 20.6      | 5.29     |
| 430.29 | 24.6      | 6.32     |
| 440.26 | 6.3       | 1.62     |
| 442.28 | 86.6      | 22.22    |
| 443.28 | 15.0      | 3.84     |

|        |       |        |
|--------|-------|--------|
| 447.29 | 11.9  | 3.06   |
| 454.25 | 31.3  | 8.03   |
| 456.27 | 43.6  | 11.20  |
| 457.29 | 6.2   | 1.60   |
| 470.26 | 7.2   | 1.84   |
| 472.27 | 389.6 | 100.00 |
| 473.29 | 60.5  | 15.53  |
| 486.29 | 6.6   | 1.70   |
| 515.32 | 11.1  | 2.84   |
| 540.30 | 6.1   | 1.56   |
| 554.31 | 5.6   | 1.43   |
| 556.35 | 9.2   | 2.37   |
| 570.32 | 6.6   | 1.70   |
| 584.31 | 19.0  | 4.87   |
| 586.34 | 268.0 | 68.80  |
| 587.35 | 56.0  | 14.38  |
| 589.36 | 100.1 | 25.70  |
| 590.37 | 20.6  | 5.29   |
| 614.35 | 40.0  | 10.28  |
| 615.37 | 8.4   | 2.17   |
| 618.38 | 361.9 | 92.91  |
| 619.39 | 73.4  | 18.84  |
| 630.38 | 10.1  | 2.60   |
| 660.40 | 246.2 | 63.20  |
| 661.42 | 51.8  | 13.30  |

SPECTRUM - MS

7-2-13\_HMG21\_924\_MS4\_1109\_472\_01.raw

ITMS + p ESI E Full ms4 924.60@cid35.00 1110.00@cid35.00 473.00@cid35.00 [130.00-500.00]

Scan #: 1-50

RT: 0.00-4.33

AV: 50

m/z Intensity Relative

|        |      |       |
|--------|------|-------|
| 149.02 | 0.7  | 1.95  |
| 171.10 | 0.7  | 2.14  |
| 180.04 | 0.9  | 2.49  |
| 188.07 | 0.6  | 1.81  |
| 193.97 | 0.4  | 1.11  |
| 194.11 | 0.5  | 1.36  |
| 203.77 | 0.1  | 0.38  |
| 204.04 | 1.0  | 2.80  |
| 208.16 | 0.2  | 0.58  |
| 218.10 | 0.3  | 0.90  |
| 220.09 | 3.6  | 10.42 |
| 221.12 | 0.2  | 0.52  |
| 227.09 | 21.8 | 63.25 |
| 228.06 | 1.0  | 2.91  |
| 228.21 | 0.5  | 1.59  |
| 236.08 | 3.5  | 10.20 |
| 236.97 | 0.2  | 0.44  |

|        |      |        |
|--------|------|--------|
| 237.14 | 0.1  | 0.39   |
| 243.10 | 0.2  | 0.67   |
| 245.09 | 10.4 | 30.18  |
| 246.14 | 0.6  | 1.84   |
| 250.12 | 0.3  | 0.76   |
| 258.80 | 0.1  | 0.37   |
| 259.20 | 0.6  | 1.67   |
| 268.14 | 34.4 | 100.00 |
| 269.14 | 2.2  | 6.45   |
| 273.03 | 0.1  | 0.39   |
| 287.16 | 0.9  | 2.59   |
| 301.16 | 0.1  | 0.43   |
| 315.17 | 26.2 | 75.99  |
| 316.19 | 3.1  | 8.95   |
| 324.28 | 0.3  | 0.73   |
| 366.20 | 0.2  | 0.72   |
| 367.29 | 0.2  | 0.47   |
| 368.21 | 0.4  | 1.31   |
| 380.21 | 1.3  | 3.74   |
| 381.26 | 0.2  | 0.49   |
| 396.24 | 0.3  | 0.76   |
| 398.21 | 3.0  | 8.57   |
| 399.25 | 0.9  | 2.53   |
| 401.30 | 0.2  | 0.48   |
| 408.19 | 0.3  | 0.83   |
| 430.27 | 3.3  | 9.60   |
| 431.27 | 0.5  | 1.33   |
| 440.23 | 6.5  | 18.92  |
| 441.24 | 1.2  | 3.35   |
| 442.39 | 2.0  | 5.76   |
| 443.22 | 0.6  | 1.71   |
| 472.28 | 15.4 | 44.77  |
| 473.28 | 2.0  | 5.72   |

HMG 27 Mass spectral peak lists

SPECTRUM - MS

10-10-13\_HMG27\_837\_MS2\_01.raw

ITMS + p ESI E Full ms2 837.80@cid35.00 [230.00-2000.00]

Scan #: 1-20

RT: 0.00-1.77

AV: 20

| m/z     | Intensity | Relative |
|---------|-----------|----------|
| 259.10  | 425.9     | 6.86     |
| 412.21  | 263.9     | 4.25     |
| 472.25  | 106.3     | 1.71     |
| 486.26  | 3618.2    | 58.27    |
| 487.26  | 816.0     | 13.14    |
| 488.27  | 156.8     | 2.53     |
| 581.31  | 75.3      | 1.21     |
| 605.33  | 584.7     | 9.42     |
| 605.84  | 370.4     | 5.96     |
| 606.34  | 162.4     | 2.62     |
| 681.87  | 1094.8    | 17.63    |
| 682.38  | 812.3     | 13.08    |
| 682.88  | 384.9     | 6.20     |
| 683.39  | 135.4     | 2.18     |
| 700.41  | 93.9      | 1.51     |
| 718.36  | 230.7     | 3.72     |
| 718.86  | 1795.4    | 28.92    |
| 719.37  | 1325.4    | 21.34    |
| 719.87  | 617.3     | 9.94     |
| 720.40  | 510.9     | 8.23     |
| 720.88  | 89.9      | 1.45     |
| 722.42  | 101.3     | 1.63     |
| 738.41  | 1003.9    | 16.17    |
| 739.41  | 386.9     | 6.23     |
| 740.42  | 106.2     | 1.71     |
| 760.32  | 64.9      | 1.04     |
| 776.39  | 56.7      | 0.91     |
| 778.39  | 260.3     | 4.19     |
| 780.38  | 109.0     | 1.76     |
| 808.93  | 89.7      | 1.45     |
| 809.43  | 67.3      | 1.08     |
| 836.35  | 67.4      | 1.08     |
| 836.98  | 748.0     | 12.05    |
| 837.45  | 676.2     | 10.89    |
| 837.95  | 346.0     | 5.57     |
| 838.42  | 179.7     | 2.89     |
| 935.44  | 252.4     | 4.06     |
| 936.45  | 115.9     | 1.87     |
| 1079.47 | 146.5     | 2.36     |
| 1080.48 | 76.5      | 1.23     |
| 1167.45 | 59.0      | 0.95     |



|         |        |        |
|---------|--------|--------|
| 1187.59 | 6209.3 | 100.00 |
| 1188.59 | 3722.6 | 59.95  |
| 1189.59 | 1416.5 | 22.81  |
| 1190.60 | 400.9  | 6.46   |
| 1191.60 | 83.3   | 1.34   |
| 1414.69 | 1421.2 | 22.89  |
| 1415.69 | 1022.5 | 16.47  |
| 1416.70 | 445.5  | 7.17   |
| 1417.72 | 166.7  | 2.68   |

SPECTRUM - MS

10-10-13\_HMG27\_837\_MS3\_935\_01.raw

ITMS + p ESI E Full ms3 837.80@cid35.00 936.00@cid35.00 [255.00-1000.00]

Scan #: 1-20

RT: 0.00-1.17

AV: 20

m/z Intensity Relative

|        |       |        |
|--------|-------|--------|
| 268.08 | 0.5   | 0.27   |
| 315.09 | 0.9   | 0.47   |
| 380.09 | 0.5   | 0.27   |
| 384.16 | 0.6   | 0.29   |
| 412.26 | 2.1   | 1.04   |
| 424.18 | 0.8   | 0.39   |
| 425.20 | 0.9   | 0.43   |
| 440.22 | 0.8   | 0.39   |
| 472.23 | 198.0 | 100.00 |
| 473.25 | 32.7  | 16.50  |
| 474.20 | 2.1   | 1.05   |
| 474.36 | 2.2   | 1.10   |
| 486.25 | 62.0  | 31.33  |
| 487.26 | 11.3  | 5.69   |
| 488.21 | 0.5   | 0.26   |
| 488.35 | 0.5   | 0.23   |
| 607.43 | 0.4   | 0.21   |
| 625.31 | 20.5  | 10.38  |
| 626.42 | 1.8   | 0.90   |
| 626.53 | 1.3   | 0.67   |
| 657.25 | 0.4   | 0.21   |
| 657.40 | 0.5   | 0.25   |
| 670.34 | 0.4   | 0.22   |
| 690.38 | 0.6   | 0.32   |
| 699.35 | 132.1 | 66.71  |
| 700.35 | 41.7  | 21.06  |
| 701.17 | 1.3   | 0.65   |
| 701.39 | 4.3   | 2.19   |
| 708.43 | 0.6   | 0.31   |
| 717.22 | 0.4   | 0.20   |
| 738.41 | 2.7   | 1.34   |
| 739.48 | 1.0   | 0.51   |
| 766.36 | 1.8   | 0.92   |

|        |      |       |
|--------|------|-------|
| 766.53 | 0.7  | 0.38  |
| 767.50 | 0.8  | 0.41  |
| 778.29 | 0.9  | 0.44  |
| 778.53 | 0.7  | 0.36  |
| 779.34 | 0.5  | 0.24  |
| 779.45 | 0.4  | 0.20  |
| 881.23 | 0.5  | 0.23  |
| 893.52 | 0.4  | 0.22  |
| 894.43 | 0.8  | 0.40  |
| 905.30 | 1.0  | 0.49  |
| 905.50 | 0.7  | 0.33  |
| 906.35 | 0.9  | 0.45  |
| 935.36 | 22.8 | 11.50 |
| 935.56 | 15.4 | 7.76  |
| 936.49 | 13.3 | 6.70  |
| 937.35 | 2.5  | 1.25  |
| 937.62 | 1.4  | 0.72  |

SPECTRUM - MS

10-10-13\_HMG27\_837\_MS4\_935\_486\_01.raw

ITMS + p ESI E Full ms4 837.80@cid35.00 936.00@cid35.00 487.00@cid35.00 [130.00-500.00]

Scan #: 1-50

RT: 0.00-3.73

AV: 50

| m/z    | Intensity | Relative |
|--------|-----------|----------|
| 208.08 | 0.3       | 5.02     |
| 209.04 | 0.0       | 0.41     |
| 209.21 | 0.0       | 0.59     |
| 211.09 | 0.0       | 0.40     |
| 218.02 | 0.0       | 0.47     |
| 220.04 | 0.0       | 0.63     |
| 227.03 | 0.0       | 0.68     |
| 230.99 | 0.0       | 0.29     |
| 241.06 | 0.3       | 4.98     |
| 242.14 | 0.0       | 0.41     |
| 250.09 | 0.2       | 4.86     |
| 250.96 | 0.0       | 0.27     |
| 251.13 | 0.0       | 0.67     |
| 252.08 | 0.7       | 13.33    |
| 253.01 | 0.1       | 1.03     |
| 253.18 | 0.0       | 0.38     |
| 257.10 | 0.1       | 1.86     |
| 258.19 | 0.0       | 0.28     |
| 259.10 | 4.8       | 94.87    |
| 260.16 | 0.3       | 6.13     |
| 268.15 | 0.1       | 1.64     |
| 294.12 | 0.0       | 0.29     |
| 307.09 | 0.0       | 0.86     |
| 311.02 | 0.0       | 0.29     |
| 314.06 | 0.0       | 0.62     |

|        |     |        |
|--------|-----|--------|
| 329.29 | 0.0 | 0.37   |
| 341.25 | 0.1 | 1.19   |
| 371.17 | 0.0 | 0.42   |
| 379.28 | 0.0 | 0.36   |
| 382.16 | 0.1 | 1.11   |
| 384.19 | 0.1 | 2.68   |
| 384.87 | 0.0 | 0.32   |
| 385.12 | 0.0 | 0.46   |
| 412.21 | 5.1 | 100.00 |
| 412.81 | 0.0 | 0.31   |
| 413.23 | 0.8 | 14.93  |
| 414.27 | 0.1 | 1.14   |
| 414.42 | 0.0 | 0.45   |
| 415.09 | 0.1 | 1.50   |
| 415.25 | 0.0 | 0.67   |
| 426.23 | 0.0 | 0.90   |
| 431.29 | 0.0 | 0.31   |
| 444.25 | 2.5 | 49.73  |
| 445.26 | 0.4 | 7.43   |
| 452.11 | 0.0 | 0.29   |
| 454.30 | 0.0 | 0.31   |
| 456.27 | 0.0 | 0.30   |
| 471.09 | 0.0 | 0.34   |
| 486.24 | 0.7 | 13.59  |
| 487.21 | 0.2 | 3.75   |

SPECTRUM - MS

10-10-13\_HMG27\_837\_MS4\_935\_472\_01.raw

ITMS + p ESI E Full ms4 837.80@cid35.00 936.00@cid35.00 473.00@cid35.00 [130.00-500.00]

Scan #: 1-100

RT: 0.00-8.56

AV: 100

m/z Intensity Relative

|        |     |       |
|--------|-----|-------|
| 148.96 | 0.2 | 2.24  |
| 171.00 | 0.2 | 2.59  |
| 178.11 | 0.0 | 0.48  |
| 180.02 | 0.3 | 3.61  |
| 188.06 | 0.2 | 2.41  |
| 194.02 | 0.2 | 2.25  |
| 204.00 | 0.3 | 3.88  |
| 210.07 | 0.0 | 0.62  |
| 218.00 | 0.1 | 1.24  |
| 220.06 | 1.0 | 13.13 |
| 221.09 | 0.1 | 1.42  |
| 227.07 | 4.9 | 65.53 |
| 228.10 | 0.3 | 4.43  |
| 236.07 | 0.9 | 12.67 |
| 237.06 | 0.1 | 0.89  |
| 243.13 | 0.1 | 1.01  |
| 245.08 | 2.2 | 29.65 |

|        |     |        |
|--------|-----|--------|
| 246.08 | 0.2 | 2.23   |
| 250.08 | 0.1 | 0.95   |
| 268.12 | 7.5 | 100.00 |
| 269.12 | 0.7 | 9.24   |
| 270.16 | 0.1 | 0.81   |
| 287.10 | 0.3 | 3.89   |
| 292.05 | 0.0 | 0.48   |
| 315.15 | 6.3 | 84.05  |
| 316.17 | 0.7 | 9.12   |
| 317.24 | 0.0 | 0.60   |
| 324.13 | 0.1 | 1.75   |
| 325.12 | 0.0 | 0.64   |
| 339.21 | 0.1 | 0.91   |
| 366.11 | 0.1 | 0.80   |
| 367.18 | 0.1 | 1.19   |
| 368.17 | 0.2 | 2.28   |
| 370.22 | 0.1 | 0.68   |
| 380.18 | 0.4 | 5.96   |
| 385.07 | 0.0 | 0.62   |
| 385.24 | 0.0 | 0.50   |
| 398.27 | 0.3 | 4.31   |
| 399.20 | 0.3 | 3.95   |
| 401.10 | 0.0 | 0.62   |
| 401.24 | 0.1 | 0.70   |
| 408.18 | 0.1 | 1.49   |
| 430.24 | 0.3 | 3.57   |
| 440.19 | 1.6 | 20.83  |
| 441.20 | 0.3 | 3.50   |
| 442.22 | 0.8 | 10.87  |
| 443.31 | 0.1 | 1.20   |
| 472.23 | 1.5 | 19.83  |
| 473.20 | 0.2 | 3.31   |
| 473.37 | 0.1 | 1.47   |

HMG 28 Mass spectral peak lists

SPECTRUM - MS

7-12-13\_HMG28\_924\_MS2\_01.raw

ITMS + p ESI E Full ms2 924.40@cid35.00 [250.00-2000.00]

Scan #: 1-20

RT: 0.00-1.66

AV: 20

| m/z     | Intensity | Relative |  |
|---------|-----------|----------|--|
| 406.15  | 1973.3    | 1.60     |  |
| 472.25  | 8188.4    | 6.63     |  |
| 534.33  | 8521.7    | 6.90     |  |
| 535.34  | 2245.8    | 1.82     |  |
| 586.31  | 3617.7    | 2.93     |  |
| 605.34  | 2960.3    | 2.40     |  |
| 660.36  | 91296.3   | 73.88    |  |
| 661.37  | 26561.0   | 21.49    |  |
| 662.38  | 5484.2    | 4.44     |  |
| 738.43  | 123570.7  | 100.00   |  |
| 739.43  | 44546.8   | 36.05    |  |
| 740.43  | 9982.7    | 8.08     |  |
| 768.93  | 14842.5   | 12.01    |  |
| 769.43  | 11562.0   | 9.36     |  |
| 769.93  | 5333.1    | 4.32     |  |
| 805.94  | 59131.8   | 47.85    |  |
| 806.44  | 48878.9   | 39.56    |  |
| 806.95  | 23714.1   | 19.19    |  |
| 807.46  | 7731.5    | 6.26     |  |
| 820.96  | 26786.0   | 21.68    |  |
| 821.47  | 21613.0   | 17.49    |  |
| 821.97  | 10335.4   | 8.36     |  |
| 822.48  | 3192.9    | 2.58     |  |
| 829.96  | 5617.9    | 4.55     |  |
| 830.47  | 4966.0    | 4.02     |  |
| 830.98  | 2074.1    | 1.68     |  |
| 873.44  | 6532.7    | 5.29     |  |
| 874.47  | 6557.1    | 5.31     |  |
| 874.98  | 2863.7    | 2.32     |  |
| 875.46  | 2272.2    | 1.84     |  |
| 907.98  | 2844.5    | 2.30     |  |
| 908.49  | 2565.4    | 2.08     |  |
| 924.04  | 41177.5   | 33.32    |  |
| 924.52  | 38420.2   | 31.09    |  |
| 925.00  | 22006.5   | 17.81    |  |
| 925.51  | 9444.6    | 7.64     |  |
| 1079.49 | 6026.0    | 4.88     |  |
| 1080.50 | 2992.7    | 2.42     |  |
| 1109.53 | 45182.3   | 36.56    |  |
| 1110.54 | 22574.5   | 18.27    |  |
| 1111.56 | 7105.2    | 5.75     |  |

|         |          |       |
|---------|----------|-------|
| 1187.61 | 117738.4 | 95.28 |
| 1188.62 | 67856.1  | 54.91 |
| 1189.62 | 23646.9  | 19.14 |
| 1190.63 | 4630.9   | 3.75  |
| 1400.70 | 1978.2   | 1.60  |
| 1588.81 | 18963.7  | 15.35 |
| 1589.81 | 15458.8  | 12.51 |
| 1590.82 | 6913.4   | 5.59  |
| 1591.81 | 1982.8   | 1.60  |

SPECTRUM - MS

7-12-13\_HMG28\_924\_MS3\_1109\_01.raw

ITMS + p ESI E Full ms3 924.40@cid35.00 1110.00@cid35.00 [305.00-1200.00]

Scan #: 1-20

RT: 0.00-2.50

AV: 20

| m/z    | Intensity | Relative |
|--------|-----------|----------|
| 424.22 | 83.1      | 1.26     |
| 425.16 | 13.3      | 0.20     |
| 442.25 | 29.8      | 0.45     |
| 454.29 | 16.7      | 0.25     |
| 472.24 | 3546.0    | 53.86    |
| 473.25 | 531.8     | 8.08     |
| 474.28 | 54.0      | 0.82     |
| 500.24 | 13.0      | 0.20     |
| 586.29 | 104.8     | 1.59     |
| 587.27 | 18.6      | 0.28     |
| 611.34 | 20.2      | 0.31     |
| 618.34 | 42.4      | 0.64     |
| 625.30 | 15.5      | 0.24     |
| 660.35 | 6583.6    | 100.00   |
| 661.37 | 1519.0    | 23.07    |
| 662.37 | 197.6     | 3.00     |
| 667.31 | 47.5      | 0.72     |
| 685.36 | 17.5      | 0.27     |
| 716.38 | 18.9      | 0.29     |
| 799.38 | 837.4     | 12.72    |
| 800.38 | 260.0     | 3.95     |
| 801.32 | 23.2      | 0.35     |
| 801.48 | 25.9      | 0.39     |
| 829.46 | 45.4      | 0.69     |
| 831.52 | 25.2      | 0.38     |
| 832.45 | 20.5      | 0.31     |
| 864.54 | 22.1      | 0.34     |
| 873.43 | 6188.6    | 94.00    |
| 874.43 | 1980.3    | 30.08    |
| 875.46 | 329.6     | 5.01     |
| 882.46 | 90.3      | 1.37     |
| 883.35 | 19.2      | 0.29     |
| 883.53 | 13.4      | 0.20     |

|         |        |       |       |
|---------|--------|-------|-------|
| 891.46  | 14.7   | 0.22  |       |
| 903.46  | 695.9  | 10.57 |       |
| 904.47  | 210.6  | 3.20  |       |
| 905.52  | 39.4   | 0.60  |       |
| 921.51  | 39.0   | 0.59  |       |
| 952.46  | 257.1  | 3.91  |       |
| 953.40  | 46.9   | 0.71  |       |
| 953.60  | 33.6   | 0.51  |       |
| 954.57  | 13.2   | 0.20  |       |
| 1038.52 |        | 13.6  | 0.21  |
| 1067.61 |        | 51.3  | 0.78  |
| 1068.51 |        | 18.6  | 0.28  |
| 1068.68 |        | 17.3  | 0.26  |
| 1079.49 |        | 31.8  | 0.48  |
| 1109.53 | 1638.0 |       | 24.88 |
| 1110.54 | 889.4  | 13.51 |       |
| 1111.55 | 253.9  | 3.86  |       |

SPECTRUM - MS

7-12-13\_HMG28\_924\_MS4\_1109\_660\_01.raw

ITMS + p ESI E Full ms4 924.40@cid35.00 1110.00@cid35.00 661.00@cid35.00 [180.00-700.00]

Scan #: 1-100

RT: 0.00-12.66

AV: 100

| m/z    | Intensity | Relative |
|--------|-----------|----------|
| 229.09 | 25.0      | 7.72     |
| 236.06 | 11.7      | 3.62     |
| 241.09 | 13.7      | 4.24     |
| 259.10 | 323.5     | 100.00   |
| 260.11 | 25.3      | 7.81     |
| 287.09 | 5.2       | 1.62     |
| 301.12 | 6.1       | 1.89     |
| 329.18 | 4.6       | 1.43     |
| 338.19 | 5.2       | 1.60     |
| 364.18 | 14.3      | 4.41     |
| 368.19 | 5.7       | 1.76     |
| 380.18 | 5.4       | 1.66     |
| 382.20 | 13.4      | 4.13     |
| 384.18 | 5.8       | 1.78     |
| 398.19 | 11.5      | 3.56     |
| 399.20 | 5.5       | 1.69     |
| 400.23 | 7.4       | 2.28     |
| 412.21 | 19.8      | 6.11     |
| 424.19 | 23.1      | 7.14     |
| 426.21 | 24.0      | 7.43     |
| 430.25 | 11.6      | 3.57     |
| 440.18 | 5.4       | 1.66     |
| 442.25 | 98.0      | 30.29    |
| 443.26 | 15.7      | 4.85     |
| 447.25 | 7.2       | 2.24     |

|        |       |       |
|--------|-------|-------|
| 454.22 | 21.3  | 6.59  |
| 456.22 | 22.7  | 7.02  |
| 470.24 | 5.1   | 1.58  |
| 472.23 | 196.1 | 60.60 |
| 473.24 | 30.3  | 9.37  |
| 486.23 | 7.3   | 2.26  |
| 515.27 | 11.3  | 3.51  |
| 540.22 | 5.5   | 1.71  |
| 554.24 | 5.4   | 1.66  |
| 556.31 | 8.5   | 2.62  |
| 570.28 | 8.8   | 2.72  |
| 584.29 | 14.2  | 4.40  |
| 586.29 | 233.8 | 72.26 |
| 587.31 | 49.6  | 15.33 |
| 588.33 | 5.7   | 1.77  |
| 589.32 | 81.9  | 25.30 |
| 590.31 | 20.4  | 6.31  |
| 614.29 | 37.4  | 11.55 |
| 615.29 | 8.9   | 2.74  |
| 618.33 | 258.6 | 79.93 |
| 619.34 | 56.9  | 17.59 |
| 620.35 | 7.1   | 2.20  |
| 630.32 | 9.0   | 2.79  |
| 660.35 | 77.6  | 23.98 |
| 661.36 | 15.5  | 4.80  |

SPECTRUM - MS

7-12-13\_HMG28\_924\_MS4\_1109\_472\_01.raw

ITMS + p ESI E Full ms4 924.40@cid35.00 1110.00@cid35.00 473.00@cid35.00 [130.00-500.00]

Scan #: 1-50

RT: 0.00-5.64

AV: 50

m/z Intensity Relative

|        |       |       |
|--------|-------|-------|
| 149.02 | 1.9   | 1.15  |
| 171.00 | 3.4   | 2.04  |
| 178.10 | 0.7   | 0.45  |
| 180.02 | 5.9   | 3.55  |
| 188.05 | 3.4   | 2.04  |
| 194.06 | 3.7   | 2.23  |
| 204.01 | 6.1   | 3.65  |
| 218.06 | 1.8   | 1.10  |
| 218.84 | 0.8   | 0.46  |
| 220.06 | 21.0  | 12.66 |
| 221.04 | 1.6   | 0.98  |
| 227.07 | 105.4 | 63.39 |
| 228.09 | 8.3   | 5.00  |
| 236.07 | 17.5  | 10.50 |
| 237.05 | 1.6   | 0.95  |
| 243.10 | 1.2   | 0.75  |
| 245.07 | 51.7  | 31.10 |



|        |       |        |
|--------|-------|--------|
| 246.15 | 2.5   | 1.52   |
| 250.10 | 1.1   | 0.69   |
| 259.10 | 7.7   | 4.65   |
| 268.12 | 166.3 | 100.00 |
| 269.12 | 14.8  | 8.89   |
| 287.08 | 6.3   | 3.77   |
| 301.13 | 0.8   | 0.51   |
| 315.15 | 135.4 | 81.43  |
| 316.15 | 15.2  | 9.11   |
| 317.13 | 1.1   | 0.65   |
| 324.21 | 0.9   | 0.56   |
| 327.22 | 0.8   | 0.46   |
| 348.24 | 0.8   | 0.48   |
| 366.10 | 1.1   | 0.67   |
| 367.14 | 1.9   | 1.17   |
| 368.20 | 3.6   | 2.18   |
| 380.21 | 7.5   | 4.48   |
| 385.18 | 0.8   | 0.51   |
| 398.20 | 14.7  | 8.84   |
| 399.25 | 3.1   | 1.88   |
| 401.26 | 0.7   | 0.44   |
| 408.09 | 0.8   | 0.48   |
| 408.31 | 0.8   | 0.49   |
| 412.16 | 1.2   | 0.72   |
| 430.26 | 13.4  | 8.07   |
| 431.23 | 1.0   | 0.59   |
| 440.19 | 33.7  | 20.25  |
| 441.20 | 4.7   | 2.81   |
| 442.21 | 18.9  | 11.38  |
| 443.25 | 2.1   | 1.28   |
| 472.24 | 67.5  | 40.60  |
| 473.30 | 11.0  | 6.61   |
| 474.32 | 2.9   | 1.77   |

SPECTRUM - MS

8-12-13\_HMG29\_924\_MS2\_01.raw

ITMS + p ESI E Full ms2 924.60@cid35.00 [250.00-2000.00]

Scan #: 1-20

RT: 0.00-1.58

AV: 20

| m/z     | Intensity | Relative |
|---------|-----------|----------|
| 406.18  | 229.6     | 0.44     |
| 415.27  | 742.0     | 1.42     |
| 431.25  | 299.7     | 0.57     |
| 433.28  | 25491.8   | 48.89    |
| 434.28  | 5347.5    | 10.26    |
| 435.30  | 613.4     | 1.18     |
| 472.29  | 505.5     | 0.97     |
| 534.37  | 496.6     | 0.95     |
| 581.37  | 254.2     | 0.49     |
| 581.87  | 216.7     | 0.42     |
| 586.36  | 3923.9    | 7.53     |
| 587.37  | 1236.0    | 2.37     |
| 605.39  | 452.3     | 0.87     |
| 605.90  | 361.5     | 0.69     |
| 660.40  | 41073.4   | 78.78    |
| 661.41  | 14784.4   | 28.36    |
| 662.42  | 2208.9    | 4.24     |
| 681.94  | 2581.7    | 4.95     |
| 682.45  | 2699.0    | 5.18     |
| 682.96  | 973.6     | 1.87     |
| 699.42  | 524.9     | 1.01     |
| 700.41  | 223.1     | 0.43     |
| 718.94  | 2428.0    | 4.66     |
| 719.45  | 2627.8    | 5.04     |
| 719.95  | 1036.4    | 1.99     |
| 738.48  | 11729.6   | 22.50    |
| 739.49  | 5331.4    | 10.23    |
| 740.49  | 905.4     | 1.74     |
| 830.03  | 268.1     | 0.51     |
| 830.53  | 391.4     | 0.75     |
| 874.54  | 202.1     | 0.39     |
| 875.03  | 325.1     | 0.62     |
| 875.55  | 192.9     | 0.37     |
| 908.56  | 236.7     | 0.45     |
| 924.12  | 6436.2    | 12.35    |
| 924.58  | 11153.4   | 21.39    |
| 925.08  | 6483.0    | 12.43    |
| 1079.57 | 624.6     | 1.20     |
| 1080.58 | 423.7     | 0.81     |
| 1109.62 | 2921.6    | 5.60     |

|         |         |        |
|---------|---------|--------|
| 1110.63 | 2002.9  | 3.84   |
| 1111.65 | 525.1   | 1.01   |
| 1187.70 | 52136.2 | 100.00 |
| 1188.70 | 42886.8 | 82.26  |
| 1189.71 | 12060.8 | 23.13  |
| 1340.73 | 308.2   | 0.59   |
| 1341.76 | 353.2   | 0.68   |
| 1414.82 | 18320.8 | 35.14  |
| 1415.82 | 19489.3 | 37.38  |
| 1416.83 | 6819.4  | 13.08  |

SPECTRUM - MS

8-12-13\_HMG29\_924\_MS3\_1109\_01.raw

ITMS + p ESI E Full ms3 924.60@cid35.00 1110.00@cid35.00 [305.00-1200.00]

Scan #: 1-50

RT: 0.00-3.24

AV: 50

m/z Intensity Relative

|        |       |        |
|--------|-------|--------|
| 415.25 | 5.0   | 0.55   |
| 415.41 | 2.3   | 0.26   |
| 424.02 | 1.7   | 0.19   |
| 424.24 | 11.9  | 1.30   |
| 425.28 | 1.6   | 0.18   |
| 430.10 | 1.5   | 0.17   |
| 430.33 | 1.8   | 0.19   |
| 431.26 | 1.7   | 0.19   |
| 433.27 | 117.5 | 12.84  |
| 434.33 | 8.1   | 0.89   |
| 454.22 | 3.0   | 0.33   |
| 472.28 | 350.5 | 38.29  |
| 473.30 | 40.5  | 4.43   |
| 542.31 | 6.6   | 0.72   |
| 543.31 | 1.3   | 0.14   |
| 558.27 | 4.0   | 0.44   |
| 586.34 | 30.9  | 3.38   |
| 587.38 | 6.8   | 0.74   |
| 618.44 | 2.4   | 0.26   |
| 625.35 | 79.6  | 8.69   |
| 626.42 | 14.3  | 1.57   |
| 628.41 | 5.2   | 0.57   |
| 629.29 | 1.2   | 0.14   |
| 653.43 | 1.9   | 0.20   |
| 657.43 | 14.2  | 1.55   |
| 658.45 | 3.5   | 0.38   |
| 660.40 | 689.9 | 75.35  |
| 661.41 | 128.6 | 14.05  |
| 669.46 | 1.5   | 0.17   |
| 699.41 | 915.5 | 100.00 |
| 700.41 | 195.7 | 21.38  |
| 701.36 | 1.3   | 0.14   |

|         |      |      |      |
|---------|------|------|------|
| 717.42  | 2.7  | 0.30 |      |
| 864.53  | 1.3  | 0.14 |      |
| 882.38  | 1.3  | 0.14 |      |
| 882.59  | 4.4  | 0.48 |      |
| 883.52  | 2.4  | 0.26 |      |
| 921.36  | 1.7  | 0.18 |      |
| 921.54  | 2.7  | 0.29 |      |
| 952.51  | 30.0 | 3.27 |      |
| 953.51  | 10.9 | 1.19 |      |
| 1038.53 |      | 1.5  | 0.16 |
| 1067.46 |      | 1.5  | 0.17 |
| 1067.58 |      | 1.4  | 0.15 |
| 1079.59 |      | 5.1  | 0.56 |
| 1079.76 |      | 1.3  | 0.14 |
| 1080.67 |      | 1.7  | 0.18 |
| 1109.69 |      | 79.3 | 8.66 |
| 1110.52 |      | 26.2 | 2.86 |
| 1110.74 |      | 21.8 | 2.39 |

SPECTRUM - MS

8-12-13\_HMG29\_924\_MS4\_1109\_660\_02.raw

ITMS + p ESI E Full ms4 924.60@cid35.00 1110.00@cid35.00 661.00@cid35.00 [180.00-700.00]

Scan #: 1-100

RT: 0.00-6.39

AV: 100

| m/z    | Intensity | Relative |
|--------|-----------|----------|
| 208.14 | 0.4       | 0.23     |
| 211.09 | 0.3       | 0.22     |
| 243.09 | 0.5       | 0.29     |
| 245.08 | 5.0       | 3.17     |
| 246.08 | 0.5       | 0.30     |
| 250.15 | 0.6       | 0.36     |
| 268.13 | 0.4       | 0.23     |
| 285.08 | 0.6       | 0.38     |
| 313.13 | 0.8       | 0.52     |
| 323.23 | 0.5       | 0.30     |
| 351.18 | 0.3       | 0.18     |
| 353.19 | 3.0       | 1.89     |
| 354.35 | 0.3       | 0.16     |
| 380.22 | 0.2       | 0.13     |
| 383.20 | 2.0       | 1.24     |
| 384.17 | 0.4       | 0.24     |
| 387.22 | 1.2       | 0.76     |
| 398.20 | 5.4       | 3.42     |
| 399.24 | 0.4       | 0.26     |
| 401.20 | 0.5       | 0.28     |
| 415.24 | 19.2      | 12.12    |
| 416.25 | 2.1       | 1.32     |
| 417.26 | 0.6       | 0.37     |
| 431.22 | 4.8       | 3.05     |

|        |       |        |
|--------|-------|--------|
| 432.21 | 0.7   | 0.46   |
| 433.24 | 158.4 | 100.00 |
| 434.26 | 21.5  | 13.55  |
| 472.25 | 21.1  | 13.34  |
| 473.26 | 3.8   | 2.40   |
| 490.27 | 0.3   | 0.17   |
| 515.26 | 1.6   | 0.99   |
| 530.35 | 0.5   | 0.29   |
| 544.32 | 0.2   | 0.12   |
| 554.26 | 0.3   | 0.16   |
| 556.28 | 0.2   | 0.12   |
| 558.09 | 2.0   | 1.27   |
| 558.29 | 1.7   | 1.10   |
| 559.31 | 0.4   | 0.24   |
| 584.35 | 0.3   | 0.21   |
| 586.31 | 72.2  | 45.58  |
| 587.31 | 14.9  | 9.42   |
| 589.29 | 0.8   | 0.50   |
| 589.47 | 0.4   | 0.26   |
| 590.20 | 0.2   | 0.14   |
| 614.31 | 0.7   | 0.42   |
| 618.36 | 16.9  | 10.65  |
| 619.35 | 2.8   | 1.79   |
| 628.25 | 0.2   | 0.14   |
| 660.37 | 10.1  | 6.40   |
| 661.37 | 1.5   | 0.97   |

SPECTRUM - MS

8-12-13\_HMG29\_924\_MS4\_1109\_472\_02.raw

ITMS + p ESI E Full ms4 924.60@cid35.00 1110.00@cid35.00 473.00@cid35.00 [130.00-500.00]

Scan #: 1-100

RT: 0.00-6.04

AV: 100

m/z Intensity Relative

|        |     |       |
|--------|-----|-------|
| 149.01 | 0.1 | 0.87  |
| 171.01 | 0.4 | 3.05  |
| 180.05 | 0.5 | 3.81  |
| 188.02 | 0.2 | 1.94  |
| 189.09 | 0.1 | 0.52  |
| 194.01 | 0.1 | 1.20  |
| 204.04 | 0.6 | 4.64  |
| 208.14 | 0.1 | 0.65  |
| 218.02 | 0.2 | 1.44  |
| 220.07 | 1.5 | 12.64 |
| 222.18 | 0.1 | 0.69  |
| 227.08 | 7.3 | 60.73 |
| 228.07 | 0.3 | 2.88  |
| 228.25 | 0.1 | 0.77  |
| 232.08 | 0.1 | 0.60  |
| 236.06 | 0.9 | 7.20  |

|        |      |        |
|--------|------|--------|
| 245.08 | 4.1  | 34.02  |
| 246.06 | 0.1  | 0.61   |
| 246.17 | 0.1  | 0.57   |
| 250.11 | 0.2  | 1.69   |
| 268.13 | 12.0 | 100.00 |
| 269.12 | 1.1  | 9.51   |
| 287.19 | 0.2  | 1.68   |
| 315.15 | 10.3 | 85.97  |
| 316.17 | 1.1  | 9.37   |
| 324.09 | 0.2  | 1.41   |
| 324.23 | 0.2  | 1.31   |
| 366.10 | 0.1  | 0.74   |
| 367.28 | 0.1  | 0.76   |
| 368.28 | 0.2  | 1.76   |
| 370.34 | 0.1  | 0.67   |
| 380.18 | 0.3  | 2.25   |
| 385.77 | 0.1  | 0.67   |
| 396.24 | 0.1  | 0.66   |
| 398.21 | 1.3  | 10.93  |
| 399.10 | 0.1  | 1.09   |
| 399.25 | 0.3  | 2.11   |
| 401.22 | 0.3  | 2.16   |
| 408.28 | 0.1  | 1.03   |
| 412.20 | 0.1  | 0.72   |
| 430.31 | 0.3  | 2.69   |
| 440.20 | 1.7  | 14.16  |
| 441.28 | 0.2  | 1.80   |
| 442.16 | 1.1  | 9.21   |
| 442.36 | 0.7  | 5.48   |
| 443.27 | 0.1  | 1.03   |
| 443.37 | 0.1  | 0.94   |
| 472.26 | 3.8  | 32.01  |
| 473.20 | 0.3  | 2.48   |
| 473.39 | 0.1  | 0.70   |

# HMG 31 Mass spectral peak lists

## SPECTRUM - MS

8-16-13\_HMG31\_924\_MS2\_01.raw

ITMS + p ESI E Full ms2 924.40@cid35.00 [250.00-2000.00]

Scan #: 1-20

RT: 0.00-1.57

AV: 20

| m/z     | Intensity | Relative |  |
|---------|-----------|----------|--|
| 486.25  | 32906.3   | 19.84    |  |
| 487.26  | 7025.2    | 4.23     |  |
| 534.31  | 1303.4    | 0.79     |  |
| 589.33  | 5127.9    | 3.09     |  |
| 589.83  | 3352.1    | 2.02     |  |
| 590.33  | 1486.0    | 0.90     |  |
| 630.28  | 1442.0    | 0.87     |  |
| 646.31  | 3600.5    | 2.17     |  |
| 647.33  | 1156.4    | 0.70     |  |
| 660.33  | 2771.8    | 1.67     |  |
| 692.37  | 165898.6  | 100.00   |  |
| 692.87  | 112047.3  | 67.54    |  |
| 693.36  | 44349.1   | 26.73    |  |
| 693.88  | 11194.2   | 6.75     |  |
| 718.30  | 2443.3    | 1.47     |  |
| 738.39  | 17979.9   | 10.84    |  |
| 739.40  | 6818.6    | 4.11     |  |
| 740.40  | 1494.0    | 0.90     |  |
| 760.31  | 1373.8    | 0.83     |  |
| 768.89  | 1937.5    | 1.17     |  |
| 769.40  | 1567.0    | 0.94     |  |
| 805.90  | 9790.1    | 5.90     |  |
| 806.40  | 7485.5    | 4.51     |  |
| 806.90  | 3636.3    | 2.19     |  |
| 820.91  | 6711.9    | 4.05     |  |
| 821.41  | 5794.9    | 3.49     |  |
| 821.92  | 2962.5    | 1.79     |  |
| 829.93  | 3265.3    | 1.97     |  |
| 830.43  | 2924.2    | 1.76     |  |
| 830.93  | 1411.1    | 0.85     |  |
| 924.00  | 22580.2   | 13.61    |  |
| 924.47  | 21012.3   | 12.67    |  |
| 924.95  | 11746.9   | 7.08     |  |
| 925.45  | 4959.0    | 2.99     |  |
| 1109.49 | 3527.6    | 2.13     |  |
| 1110.50 | 1833.7    | 1.11     |  |
| 1155.55 | 5490.8    | 3.31     |  |
| 1156.55 | 3276.1    | 1.97     |  |
| 1157.56 | 3644.9    | 2.20     |  |
| 1158.57 | 1721.5    | 1.04     |  |
| 1187.57 | 3457.0    | 2.08     |  |

|         |         |       |
|---------|---------|-------|
| 1188.58 | 1992.4  | 1.20  |
| 1253.52 | 1841.3  | 1.11  |
| 1254.53 | 1157.1  | 0.70  |
| 1361.64 | 40738.6 | 24.56 |
| 1362.65 | 26779.4 | 16.14 |
| 1363.65 | 10380.3 | 6.26  |
| 1364.66 | 2419.8  | 1.46  |
| 1588.75 | 2661.0  | 1.60  |
| 1589.76 | 2013.4  | 1.21  |

SPECTRUM - MS

8-16-13\_HMG31\_924\_MS3\_1109\_01.raw

ITMS + p ESI E Full ms3 924.40@cid35.00 1110.00@cid35.00 [305.00-1200.00]

Scan #: 1-50

RT: 0.00-3.21

AV: 50

m/z Intensity Relative

|        |        |        |
|--------|--------|--------|
| 382.19 | 4.8    | 0.45   |
| 384.22 | 2.8    | 0.27   |
| 385.14 | 26.4   | 2.50   |
| 412.13 | 3.5    | 0.33   |
| 424.17 | 4.0    | 0.37   |
| 440.36 | 2.9    | 0.27   |
| 442.26 | 7.2    | 0.68   |
| 444.19 | 6.7    | 0.63   |
| 458.16 | 6.9    | 0.65   |
| 458.34 | 2.7    | 0.25   |
| 486.25 | 265.5  | 25.07  |
| 487.23 | 32.4   | 3.06   |
| 572.32 | 21.3   | 2.01   |
| 573.17 | 5.4    | 0.51   |
| 573.31 | 6.0    | 0.57   |
| 575.37 | 7.5    | 0.70   |
| 598.27 | 8.3    | 0.78   |
| 646.30 | 1059.1 | 100.00 |
| 647.31 | 199.6  | 18.85  |
| 690.32 | 9.0    | 0.85   |
| 690.45 | 6.6    | 0.62   |
| 706.27 | 10.5   | 0.99   |
| 707.98 | 4.1    | 0.38   |
| 708.40 | 61.4   | 5.79   |
| 709.31 | 18.5   | 1.74   |
| 778.38 | 7.0    | 0.66   |
| 799.38 | 15.5   | 1.47   |
| 800.36 | 4.7    | 0.44   |
| 843.39 | 3.4    | 0.32   |
| 873.39 | 143.6  | 13.56  |
| 874.32 | 35.7   | 3.38   |
| 874.52 | 20.6   | 1.95   |
| 891.34 | 8.7    | 0.82   |



|         |      |      |      |
|---------|------|------|------|
| 903.43  | 11.0 | 1.04 |      |
| 904.40  | 3.5  | 0.33 |      |
| 905.25  | 19.5 | 1.84 |      |
| 905.43  | 31.0 | 2.92 |      |
| 906.18  | 3.2  | 0.30 |      |
| 906.42  | 11.0 | 1.03 |      |
| 921.30  | 2.7  | 0.26 |      |
| 921.46  | 5.4  | 0.51 |      |
| 922.52  | 3.6  | 0.34 |      |
| 1003.48 |      | 3.3  | 0.31 |
| 1035.40 |      | 9.8  | 0.93 |
| 1038.50 |      | 5.5  | 0.52 |
| 1067.35 |      | 6.4  | 0.60 |
| 1067.63 |      | 7.1  | 0.67 |
| 1077.43 |      | 5.9  | 0.55 |
| 1109.47 |      | 73.6 | 6.95 |
| 1110.58 |      | 21.2 | 2.00 |

SPECTRUM - MS

8-16-13\_HMG31\_924\_MS4\_1109\_646\_01.raw

ITMS + p ESI E Full ms4 924.40@cid35.00 1110.00@cid35.00 647.00@cid35.00 [175.00-700.00]

Scan #: 1-100

RT: 0.00-7.28

AV: 100

| m/z    | Intensity | Relative |
|--------|-----------|----------|
| 194.07 | 0.6       | 1.04     |
| 204.01 | 1.2       | 2.18     |
| 211.06 | 0.5       | 0.98     |
| 218.03 | 0.7       | 1.29     |
| 220.10 | 1.0       | 1.93     |
| 227.06 | 8.0       | 14.86    |
| 229.09 | 3.9       | 7.16     |
| 236.05 | 5.1       | 9.49     |
| 243.08 | 0.6       | 1.08     |
| 245.08 | 17.9      | 33.19    |
| 246.08 | 1.0       | 1.79     |
| 287.08 | 1.2       | 2.20     |
| 292.10 | 0.6       | 1.08     |
| 315.13 | 2.4       | 4.49     |
| 343.15 | 2.6       | 4.84     |
| 353.14 | 0.6       | 1.10     |
| 366.14 | 1.4       | 2.64     |
| 367.17 | 0.6       | 1.08     |
| 368.18 | 1.8       | 3.30     |
| 369.19 | 1.0       | 1.89     |
| 378.17 | 2.0       | 3.66     |
| 380.20 | 2.8       | 5.21     |
| 382.19 | 5.0       | 9.26     |
| 383.20 | 1.0       | 1.91     |
| 384.17 | 5.2       | 9.57     |

|        |      |        |
|--------|------|--------|
| 385.16 | 54.0 | 100.00 |
| 386.17 | 6.8  | 12.54  |
| 396.23 | 0.6  | 1.02   |
| 398.18 | 1.4  | 2.58   |
| 408.18 | 0.7  | 1.30   |
| 424.19 | 4.8  | 8.84   |
| 425.18 | 0.8  | 1.51   |
| 433.28 | 0.8  | 1.39   |
| 440.18 | 12.9 | 23.85  |
| 441.21 | 2.4  | 4.44   |
| 442.22 | 13.6 | 25.11  |
| 443.24 | 2.0  | 3.64   |
| 458.21 | 5.6  | 10.42  |
| 459.30 | 0.5  | 0.99   |
| 498.25 | 0.5  | 1.00   |
| 572.28 | 53.2 | 98.61  |
| 573.29 | 16.7 | 30.91  |
| 574.22 | 0.7  | 1.34   |
| 574.40 | 0.7  | 1.22   |
| 575.30 | 17.0 | 31.40  |
| 576.31 | 3.8  | 6.95   |
| 604.33 | 3.3  | 6.17   |
| 605.33 | 1.1  | 2.09   |
| 646.32 | 9.4  | 17.34  |
| 647.29 | 2.3  | 4.32   |

SPECTRUM - MS

8-16-13\_HMG31\_924\_MS4\_1109\_486\_01.raw

ITMS + p ESI E Full ms4 924.40@cid35.00 1110.00@cid35.00 487.00@cid35.00 [130.00-500.00]

Scan #: 1-100

RT: 0.00-6.20

AV: 100

m/z Intensity Relative

|        |     |       |
|--------|-----|-------|
| 180.09 | 0.1 | 0.49  |
| 184.44 | 0.2 | 0.83  |
| 188.03 | 0.1 | 0.48  |
| 189.13 | 0.1 | 0.28  |
| 191.62 | 0.1 | 0.47  |
| 207.98 | 0.1 | 0.38  |
| 208.11 | 0.1 | 0.53  |
| 211.04 | 0.2 | 1.02  |
| 217.98 | 0.1 | 0.34  |
| 218.09 | 0.1 | 0.37  |
| 220.08 | 0.9 | 4.41  |
| 220.99 | 0.1 | 0.35  |
| 227.04 | 0.1 | 0.58  |
| 241.09 | 1.2 | 6.07  |
| 250.10 | 0.9 | 4.29  |
| 252.09 | 0.3 | 1.26  |
| 259.10 | 8.8 | 42.57 |

|        |      |        |
|--------|------|--------|
| 260.13 | 0.6  | 2.82   |
| 268.12 | 3.3  | 16.09  |
| 269.06 | 0.1  | 0.33   |
| 297.08 | 0.3  | 1.32   |
| 301.20 | 0.2  | 0.99   |
| 304.33 | 0.1  | 0.43   |
| 314.01 | 0.1  | 0.33   |
| 329.17 | 9.8  | 47.63  |
| 330.19 | 0.8  | 4.10   |
| 365.93 | 0.1  | 0.33   |
| 380.09 | 0.1  | 0.60   |
| 381.11 | 0.1  | 0.33   |
| 384.25 | 0.2  | 0.89   |
| 395.28 | 0.1  | 0.52   |
| 410.21 | 0.1  | 0.49   |
| 412.20 | 3.6  | 17.48  |
| 413.23 | 0.8  | 4.07   |
| 414.99 | 0.1  | 0.38   |
| 415.20 | 0.2  | 0.97   |
| 427.25 | 0.1  | 0.50   |
| 431.01 | 0.1  | 0.64   |
| 444.24 | 20.6 | 100.00 |
| 445.15 | 3.2  | 15.45  |
| 445.31 | 2.5  | 12.22  |
| 454.21 | 0.2  | 1.01   |
| 456.12 | 0.6  | 2.68   |
| 456.32 | 1.0  | 4.64   |
| 457.37 | 0.1  | 0.41   |
| 484.73 | 0.1  | 0.51   |
| 486.11 | 2.3  | 11.04  |
| 486.33 | 1.7  | 8.28   |
| 487.25 | 0.5  | 2.66   |
| 487.40 | 0.5  | 2.33   |

SPECTRUM - MS

8-16-13\_HMG31\_924\_MS3\_605\_01.raw

ITMS + p ESI E Full ms3 924.40@cid35.00 605.80@cid35.00 [165.00-1300.00]

Scan #: 1-101

RT: 0.00-15.46

AV: 101

m/z Intensity Relative

|        |     |      |
|--------|-----|------|
| 196.08 | 0.8 | 3.18 |
| 284.11 | 0.3 | 1.07 |
| 285.15 | 0.3 | 1.08 |
| 386.19 | 0.5 | 2.08 |
| 415.23 | 0.9 | 3.84 |
| 432.18 | 0.3 | 1.33 |
| 445.27 | 0.2 | 0.89 |
| 464.23 | 1.1 | 4.71 |
| 470.26 | 1.0 | 4.05 |

|         |      |        |
|---------|------|--------|
| 471.24  | 0.9  | 3.65   |
| 472.23  | 0.4  | 1.61   |
| 484.36  | 0.2  | 0.78   |
| 486.28  | 8.5  | 35.46  |
| 487.29  | 1.6  | 6.65   |
| 496.28  | 0.3  | 1.08   |
| 514.29  | 0.6  | 2.54   |
| 534.36  | 1.8  | 7.41   |
| 535.36  | 0.4  | 1.83   |
| 568.30  | 0.3  | 1.25   |
| 590.38  | 1.6  | 6.69   |
| 590.86  | 0.5  | 1.93   |
| 591.36  | 0.4  | 1.60   |
| 605.33  | 2.7  | 11.40  |
| 605.85  | 1.6  | 6.55   |
| 606.35  | 0.5  | 1.97   |
| 616.31  | 1.0  | 3.97   |
| 664.44  | 0.4  | 1.72   |
| 676.37  | 1.0  | 4.23   |
| 677.40  | 0.2  | 0.93   |
| 704.37  | 2.7  | 11.15  |
| 705.34  | 1.0  | 4.16   |
| 724.45  | 10.5 | 43.47  |
| 725.44  | 3.4  | 14.32  |
| 726.45  | 0.6  | 2.31   |
| 738.48  | 0.9  | 3.82   |
| 739.45  | 1.9  | 8.05   |
| 740.48  | 1.2  | 5.09   |
| 746.36  | 4.8  | 20.11  |
| 747.36  | 1.5  | 6.13   |
| 748.38  | 0.2  | 0.83   |
| 760.29  | 0.2  | 0.79   |
| 761.33  | 0.2  | 0.75   |
| 761.49  | 0.2  | 0.77   |
| 762.41  | 0.2  | 0.81   |
| 970.70  | 0.2  | 0.68   |
| 980.59  | 0.3  | 1.07   |
| 1186.69 | 0.9  | 3.64   |
| 1187.68 | 24.0 | 100.00 |
| 1188.68 | 12.6 | 52.20  |
| 1189.68 | 4.0  | 16.57  |

SPECTRUM - MS

8-16-13\_HMG31\_924\_MS3\_660\_01.raw

ITMS + p ESI E Full ms3 924.40@cid35.00 661.00@cid35.00 [180.00-700.00]

Scan #: 1-100

RT: 0.00-5.48

AV: 100

| m/z | Intensity | Relative |
|-----|-----------|----------|
|-----|-----------|----------|

|        |     |      |
|--------|-----|------|
| 229.08 | 6.0 | 2.50 |
|--------|-----|------|

|        |       |        |
|--------|-------|--------|
| 241.11 | 3.1   | 1.32   |
| 245.07 | 7.5   | 3.15   |
| 259.10 | 65.9  | 27.72  |
| 260.10 | 6.9   | 2.92   |
| 353.18 | 4.9   | 2.07   |
| 364.18 | 2.2   | 0.94   |
| 380.22 | 2.5   | 1.06   |
| 382.22 | 4.4   | 1.85   |
| 383.19 | 4.4   | 1.85   |
| 387.23 | 2.4   | 1.00   |
| 394.22 | 2.2   | 0.91   |
| 398.20 | 11.4  | 4.78   |
| 399.19 | 3.3   | 1.40   |
| 412.21 | 4.5   | 1.90   |
| 415.23 | 27.7  | 11.66  |
| 416.24 | 4.2   | 1.78   |
| 424.20 | 6.1   | 2.58   |
| 426.21 | 5.3   | 2.23   |
| 430.26 | 6.0   | 2.51   |
| 431.21 | 8.6   | 3.61   |
| 433.24 | 237.8 | 100.00 |
| 434.24 | 40.0  | 16.82  |
| 435.24 | 5.1   | 2.15   |
| 442.26 | 18.6  | 7.82   |
| 443.25 | 3.6   | 1.50   |
| 447.26 | 2.6   | 1.09   |
| 454.31 | 2.8   | 1.19   |
| 456.24 | 10.1  | 4.23   |
| 470.25 | 2.6   | 1.10   |
| 472.24 | 108.9 | 45.78  |
| 473.24 | 20.7  | 8.69   |
| 486.26 | 21.5  | 9.02   |
| 487.26 | 3.9   | 1.66   |
| 515.26 | 5.2   | 2.20   |
| 558.21 | 4.0   | 1.69   |
| 584.28 | 4.5   | 1.89   |
| 586.30 | 158.6 | 66.69  |
| 587.30 | 42.2  | 17.75  |
| 588.31 | 7.3   | 3.08   |
| 589.33 | 21.1  | 8.88   |
| 590.32 | 5.5   | 2.31   |
| 614.31 | 8.0   | 3.38   |
| 615.33 | 2.9   | 1.21   |
| 618.33 | 89.1  | 37.45  |
| 619.34 | 26.0  | 10.92  |
| 620.35 | 3.9   | 1.65   |
| 630.31 | 2.6   | 1.11   |
| 660.37 | 27.7  | 11.66  |
| 661.37 | 10.1  | 4.23   |

SPECTRUM - MS

8-16-13\_HMG31\_924\_MS4\_605\_486\_02.raw

ITMS + p ESI E Full ms4 924.40@cid35.00 605.80@cid35.00 487.00@cid35.00 [130.00-500.00]

Scan #: 1-291

RT: 0.00-37.83

AV: 291

| m/z    | Intensity | Relative |
|--------|-----------|----------|
| 188.02 | 0.0       | 0.36     |
| 211.08 | 0.0       | 0.64     |
| 216.99 | 0.0       | 0.27     |
| 218.05 | 0.0       | 0.27     |
| 220.11 | 0.0       | 1.33     |
| 236.08 | 0.0       | 0.36     |
| 241.09 | 0.1       | 2.72     |
| 242.09 | 0.0       | 0.24     |
| 249.52 | 0.0       | 0.23     |
| 250.16 | 0.0       | 0.39     |
| 252.11 | 0.0       | 0.23     |
| 256.32 | 0.0       | 0.26     |
| 257.13 | 0.0       | 0.25     |
| 259.13 | 0.2       | 7.65     |
| 260.09 | 0.0       | 1.05     |
| 268.11 | 0.1       | 4.78     |
| 269.10 | 0.0       | 0.41     |
| 301.21 | 0.0       | 0.78     |
| 315.17 | 0.0       | 0.34     |
| 329.20 | 0.3       | 12.80    |
| 330.15 | 0.0       | 1.14     |
| 330.33 | 0.0       | 0.33     |
| 335.07 | 0.0       | 0.26     |
| 352.02 | 0.0       | 0.24     |
| 369.08 | 0.0       | 0.42     |
| 371.33 | 0.0       | 0.27     |
| 384.18 | 0.0       | 0.38     |
| 384.39 | 0.0       | 0.29     |
| 387.18 | 0.0       | 0.27     |
| 392.41 | 0.0       | 0.31     |
| 399.24 | 0.0       | 0.28     |
| 410.19 | 0.0       | 0.64     |
| 411.23 | 0.0       | 0.45     |
| 412.07 | 0.0       | 0.66     |
| 412.26 | 0.0       | 0.75     |
| 413.33 | 0.0       | 0.34     |
| 415.12 | 0.0       | 0.64     |
| 415.26 | 0.0       | 0.50     |
| 415.37 | 0.0       | 0.39     |
| 426.18 | 0.0       | 0.26     |
| 431.22 | 0.0       | 0.37     |
| 444.28 | 2.6       | 100.00   |
| 445.27 | 0.4       | 17.13    |
| 454.21 | 0.0       | 0.80     |

|        |     |      |
|--------|-----|------|
| 456.28 | 0.1 | 4.47 |
| 457.13 | 0.0 | 0.33 |
| 457.32 | 0.0 | 0.76 |
| 457.56 | 0.0 | 0.23 |
| 486.28 | 0.0 | 1.25 |
| 487.13 | 0.0 | 0.25 |

HMG 33 Mass spectral peak lists

SPECTRUM - MS

7-22-13\_HMG33\_1061\_MS2\_01.raw

ITMS + p ESI E Full ms2 1062.00@cid35.00 [290.00-2000.00]

Scan #: 1-20

RT: 0.00-1.61

AV: 20

| m/z     | Intensity | Relative |
|---------|-----------|----------|
| 412.21  | 118.1     | 2.19     |
| 472.24  | 86.3      | 1.60     |
| 486.25  | 3072.0    | 57.07    |
| 487.26  | 566.2     | 10.52    |
| 598.31  | 98.6      | 1.83     |
| 605.32  | 80.7      | 1.50     |
| 674.87  | 158.2     | 2.94     |
| 675.36  | 106.6     | 1.98     |
| 699.34  | 84.5      | 1.57     |
| 706.39  | 138.9     | 2.58     |
| 711.86  | 226.5     | 4.21     |
| 712.36  | 138.9     | 2.58     |
| 724.41  | 262.8     | 4.88     |
| 829.95  | 5195.1    | 96.51    |
| 830.45  | 3858.8    | 71.68    |
| 830.95  | 1636.2    | 30.40    |
| 831.51  | 218.1     | 4.05     |
| 906.46  | 841.9     | 15.64    |
| 906.96  | 701.4     | 13.03    |
| 907.47  | 338.5     | 6.29     |
| 935.44  | 297.1     | 5.52     |
| 936.46  | 111.7     | 2.08     |
| 943.49  | 4436.1    | 82.41    |
| 943.99  | 3674.1    | 68.25    |
| 944.50  | 1767.7    | 32.84    |
| 944.99  | 253.2     | 4.70     |
| 952.48  | 93.6      | 1.74     |
| 1032.51 | 89.2      | 1.66     |
| 1061.56 | 2566.4    | 47.68    |
| 1062.04 | 2746.7    | 51.02    |
| 1062.52 | 1797.0    | 33.38    |
| 1063.06 | 308.3     | 5.73     |
| 1173.57 | 1243.8    | 23.11    |
| 1174.58 | 632.5     | 11.75    |
| 1175.60 | 175.0     | 3.25     |
| 1187.59 | 531.0     | 9.86     |
| 1188.59 | 274.8     | 5.10     |
| 1400.69 | 764.3     | 14.20    |
| 1401.70 | 498.6     | 9.26     |
| 1402.79 | 110.2     | 2.05     |
| 1528.68 | 170.2     | 3.16     |



|         |        |        |
|---------|--------|--------|
| 1529.70 | 112.9  | 2.10   |
| 1628.81 | 81.9   | 1.52   |
| 1636.83 | 5383.0 | 100.00 |
| 1637.84 | 3773.4 | 70.10  |
| 1638.84 | 1498.7 | 27.84  |
| 1639.85 | 142.9  | 2.66   |
| 1864.03 | 1139.8 | 21.17  |
| 1865.04 | 942.1  | 17.50  |
| 1866.04 | 459.4  | 8.53   |

SPECTRUM - MS

7-22-13\_HMG33\_1061\_MS3\_830\_01.raw

ITMS + p ESI E Full ms3 1062.00@cid35.00 830.40@cid35.00 [225.00-2000.00]

Scan #: 1-20

RT: 0.00-5.98

AV: 20

m/z Intensity Relative

|        |       |       |
|--------|-------|-------|
| 259.10 | 26.9  | 5.83  |
| 412.21 | 16.8  | 3.64  |
| 472.24 | 31.0  | 6.72  |
| 473.25 | 5.5   | 1.20  |
| 486.26 | 265.8 | 57.56 |
| 487.26 | 55.0  | 11.90 |
| 488.27 | 7.7   | 1.67  |
| 534.33 | 11.1  | 2.40  |
| 598.32 | 51.0  | 11.05 |
| 598.83 | 30.7  | 6.64  |
| 599.32 | 10.6  | 2.30  |
| 605.33 | 34.8  | 7.53  |
| 605.85 | 21.3  | 4.60  |
| 606.34 | 7.4   | 1.61  |
| 664.40 | 12.5  | 2.70  |
| 674.87 | 51.6  | 11.17 |
| 675.37 | 37.5  | 8.13  |
| 675.87 | 13.5  | 2.93  |
| 704.36 | 11.5  | 2.48  |
| 706.39 | 39.7  | 8.60  |
| 707.40 | 13.2  | 2.86  |
| 711.87 | 71.9  | 15.57 |
| 712.36 | 50.7  | 10.99 |
| 712.87 | 20.3  | 4.39  |
| 713.41 | 5.8   | 1.25  |
| 724.42 | 65.6  | 14.22 |
| 725.40 | 23.7  | 5.14  |
| 746.32 | 12.9  | 2.80  |
| 829.97 | 105.1 | 22.76 |
| 830.45 | 99.2  | 21.48 |
| 830.95 | 51.9  | 11.24 |
| 831.47 | 17.6  | 3.82  |
| 935.45 | 18.0  | 3.90  |

|         |     |       |        |
|---------|-----|-------|--------|
| 936.47  | 7.1 | 1.54  |        |
| 1065.49 |     | 20.0  | 4.34   |
| 1066.46 |     | 9.0   | 1.96   |
| 1125.54 |     | 5.4   | 1.18   |
| 1173.59 |     | 461.8 | 100.00 |
| 1174.60 |     | 270.0 | 58.47  |
| 1175.60 |     | 80.0  | 17.33  |
| 1176.62 |     | 11.9  | 2.58   |
| 1187.60 |     | 39.1  | 8.47   |
| 1188.61 |     | 23.0  | 4.98   |
| 1189.61 |     | 6.4   | 1.38   |
| 1195.51 |     | 5.4   | 1.17   |
| 1400.71 |     | 100.5 | 21.77  |
| 1401.71 |     | 70.8  | 15.33  |
| 1402.72 |     | 25.2  | 5.46   |
| 1636.84 |     | 11.9  | 2.59   |
| 1637.85 |     | 10.6  | 2.30   |

SPECTRUM - MS

7-22-13\_HMG33\_1061\_MS3\_934\_01.raw

ITMS + p ESI E Full ms3 1062.00@cid35.00 936.00@cid35.00 [255.00-1000.00]

Scan #: 1-20

RT: 0.00-3.01

AV: 20

| m/z    | Intensity | Relative |
|--------|-----------|----------|
| 268.11 | 0.2       | 0.46     |
| 315.21 | 0.2       | 0.45     |
| 398.25 | 0.1       | 0.36     |
| 412.21 | 0.6       | 1.86     |
| 413.15 | 0.1       | 0.22     |
| 423.95 | 0.1       | 0.26     |
| 424.21 | 0.5       | 1.35     |
| 425.11 | 0.1       | 0.24     |
| 425.25 | 0.1       | 0.37     |
| 431.32 | 0.1       | 0.35     |
| 440.17 | 0.1       | 0.35     |
| 440.30 | 0.1       | 0.22     |
| 441.27 | 0.1       | 0.23     |
| 472.23 | 34.7      | 100.00   |
| 473.24 | 9.1       | 26.39    |
| 486.25 | 15.9      | 45.86    |
| 487.24 | 3.6       | 10.50    |
| 625.27 | 4.9       | 14.00    |
| 626.30 | 1.6       | 4.51     |
| 657.35 | 0.2       | 0.69     |
| 662.47 | 0.1       | 0.20     |
| 669.39 | 0.1       | 0.28     |
| 690.45 | 0.2       | 0.66     |
| 699.34 | 26.7      | 77.16    |
| 700.34 | 12.2      | 35.19    |

|        |     |       |
|--------|-----|-------|
| 701.40 | 0.1 | 0.42  |
| 706.35 | 0.2 | 0.64  |
| 708.18 | 0.1 | 0.35  |
| 708.35 | 0.1 | 0.28  |
| 708.50 | 0.2 | 0.72  |
| 709.38 | 0.3 | 0.74  |
| 717.22 | 0.1 | 0.36  |
| 717.40 | 0.1 | 0.22  |
| 718.42 | 0.1 | 0.20  |
| 728.38 | 0.1 | 0.26  |
| 739.46 | 0.1 | 0.30  |
| 778.29 | 0.3 | 0.84  |
| 778.47 | 0.2 | 0.55  |
| 779.38 | 0.2 | 0.47  |
| 861.47 | 0.2 | 0.57  |
| 864.76 | 0.1 | 0.32  |
| 875.59 | 0.1 | 0.30  |
| 893.48 | 0.2 | 0.45  |
| 894.38 | 0.1 | 0.40  |
| 903.46 | 0.2 | 0.49  |
| 904.33 | 0.1 | 0.37  |
| 905.52 | 0.1 | 0.34  |
| 935.43 | 7.7 | 22.17 |
| 936.52 | 4.1 | 11.72 |
| 936.97 | 0.1 | 0.24  |

SPECTRUM - MS

7-22-13\_HMG33\_1061\_MS4\_934\_486\_01.raw

ITMS + p ESI E Full ms4 1062.00@cid35.00 936.00@cid35.00 487.00@cid35.00 [130.00-500.00]

Scan #: 1-50

RT: 0.00-8.70

AV: 50

m/z Intensity Relative

|        |     |       |
|--------|-----|-------|
| 138.90 | 0.0 | 0.31  |
| 178.00 | 0.0 | 0.51  |
| 188.13 | 0.0 | 0.74  |
| 208.05 | 0.1 | 4.21  |
| 211.16 | 0.0 | 0.34  |
| 212.99 | 0.0 | 0.95  |
| 213.16 | 0.0 | 0.38  |
| 218.11 | 0.0 | 0.82  |
| 220.17 | 0.0 | 0.49  |
| 222.12 | 0.0 | 0.66  |
| 241.14 | 0.1 | 4.13  |
| 242.12 | 0.0 | 0.32  |
| 250.09 | 0.1 | 6.30  |
| 251.05 | 0.0 | 0.82  |
| 252.13 | 0.3 | 14.02 |
| 253.25 | 0.0 | 0.59  |
| 257.12 | 0.0 | 1.46  |

|        |     |        |
|--------|-----|--------|
| 259.09 | 1.9 | 99.62  |
| 259.94 | 0.0 | 2.40   |
| 260.13 | 0.1 | 6.24   |
| 268.08 | 0.1 | 3.67   |
| 269.20 | 0.0 | 0.37   |
| 269.85 | 0.0 | 0.48   |
| 302.04 | 0.0 | 0.38   |
| 329.13 | 0.0 | 1.18   |
| 329.27 | 0.0 | 1.13   |
| 330.20 | 0.0 | 0.62   |
| 336.06 | 0.0 | 0.54   |
| 341.28 | 0.0 | 2.30   |
| 370.15 | 0.0 | 0.29   |
| 380.08 | 0.0 | 0.31   |
| 382.09 | 0.0 | 0.79   |
| 383.87 | 0.0 | 0.36   |
| 384.23 | 0.1 | 2.64   |
| 385.24 | 0.0 | 0.38   |
| 396.21 | 0.0 | 0.39   |
| 409.08 | 0.0 | 0.39   |
| 410.32 | 0.0 | 0.93   |
| 412.19 | 1.9 | 100.00 |
| 413.28 | 0.2 | 9.92   |
| 415.09 | 0.0 | 1.38   |
| 415.33 | 0.0 | 1.85   |
| 431.19 | 0.0 | 0.36   |
| 440.17 | 0.0 | 0.46   |
| 441.25 | 0.0 | 0.33   |
| 444.23 | 1.3 | 69.46  |
| 445.25 | 0.2 | 12.00  |
| 454.34 | 0.0 | 0.65   |
| 486.29 | 0.4 | 20.71  |
| 487.28 | 0.1 | 6.79   |

SPECTRUM - MS

7-22-13\_HMG33\_1061\_MS3\_486\_01.raw

ITMS + p ESI E Full ms3 1062.00@cid35.00 487.00@cid35.00 [130.00-500.00]

Scan #: 1-50

RT: 0.00-2.69

AV: 50

m/z Intensity Relative

|        |      |      |
|--------|------|------|
| 177.09 | 0.6  | 0.17 |
| 178.04 | 3.9  | 1.05 |
| 194.03 | 0.5  | 0.13 |
| 208.07 | 15.5 | 4.14 |
| 209.07 | 0.9  | 0.23 |
| 210.95 | 0.4  | 0.11 |
| 211.07 | 0.5  | 0.13 |
| 218.03 | 2.0  | 0.53 |
| 241.08 | 14.4 | 3.86 |

|        |       |        |
|--------|-------|--------|
| 242.10 | 1.2   | 0.33   |
| 250.09 | 26.8  | 7.17   |
| 251.08 | 1.4   | 0.37   |
| 252.09 | 45.1  | 12.08  |
| 253.09 | 4.0   | 1.06   |
| 257.07 | 5.4   | 1.45   |
| 258.07 | 0.4   | 0.11   |
| 259.09 | 332.1 | 88.97  |
| 260.11 | 26.4  | 7.08   |
| 268.13 | 6.2   | 1.67   |
| 269.19 | 0.4   | 0.11   |
| 282.13 | 0.8   | 0.22   |
| 301.05 | 1.4   | 0.37   |
| 301.23 | 0.8   | 0.22   |
| 302.09 | 0.6   | 0.15   |
| 329.21 | 0.8   | 0.22   |
| 338.13 | 0.9   | 0.25   |
| 341.18 | 3.4   | 0.92   |
| 356.21 | 1.9   | 0.51   |
| 370.19 | 0.6   | 0.16   |
| 380.27 | 1.0   | 0.26   |
| 382.20 | 5.2   | 1.40   |
| 383.23 | 0.7   | 0.19   |
| 384.13 | 10.3  | 2.77   |
| 385.13 | 1.3   | 0.36   |
| 394.21 | 0.5   | 0.12   |
| 410.24 | 4.3   | 1.16   |
| 411.19 | 0.5   | 0.13   |
| 412.20 | 373.2 | 100.00 |
| 413.21 | 49.7  | 13.32  |
| 415.22 | 4.4   | 1.19   |
| 416.21 | 0.9   | 0.24   |
| 426.40 | 0.6   | 0.16   |
| 440.26 | 0.6   | 0.16   |
| 444.24 | 143.9 | 38.54  |
| 445.25 | 22.7  | 6.09   |
| 450.30 | 0.5   | 0.13   |
| 454.27 | 1.5   | 0.40   |
| 456.36 | 2.1   | 0.56   |
| 486.24 | 67.8  | 18.17  |
| 487.26 | 11.8  | 3.17   |

SPECTRUM - MS

7-22-13\_HMG33\_1061\_MS4\_934\_472\_01.raw

ITMS + p ESI E Full ms4 1062.00@cid35.00 936.00@cid35.00 473.00@cid35.00 [130.00-500.00]

Scan #: 1-51

RT: 0.00-8.88

AV: 51

m/z      Intensity      Relative

149.00      0.1      2.09

|        |     |        |
|--------|-----|--------|
| 171.02 | 0.1 | 2.15   |
| 178.04 | 0.0 | 0.58   |
| 180.01 | 0.1 | 3.32   |
| 188.03 | 0.1 | 1.92   |
| 194.09 | 0.1 | 2.57   |
| 203.93 | 0.1 | 2.40   |
| 204.08 | 0.1 | 2.75   |
| 210.05 | 0.0 | 0.61   |
| 218.10 | 0.1 | 1.61   |
| 218.26 | 0.0 | 0.57   |
| 220.07 | 0.3 | 7.94   |
| 221.08 | 0.0 | 1.50   |
| 227.07 | 1.8 | 55.57  |
| 228.06 | 0.1 | 3.96   |
| 236.07 | 0.4 | 13.01  |
| 237.11 | 0.0 | 0.58   |
| 243.06 | 0.1 | 1.86   |
| 245.07 | 0.9 | 29.07  |
| 246.07 | 0.1 | 1.93   |
| 250.18 | 0.0 | 0.68   |
| 268.11 | 2.8 | 89.34  |
| 269.09 | 0.3 | 9.99   |
| 283.09 | 0.0 | 0.67   |
| 287.08 | 0.1 | 2.21   |
| 315.14 | 2.4 | 75.21  |
| 316.16 | 0.3 | 9.17   |
| 324.18 | 0.1 | 2.47   |
| 339.20 | 0.0 | 0.61   |
| 366.21 | 0.0 | 0.62   |
| 368.15 | 0.0 | 1.51   |
| 369.27 | 0.0 | 0.57   |
| 380.18 | 0.2 | 6.60   |
| 385.17 | 0.0 | 1.35   |
| 398.17 | 0.5 | 16.38  |
| 398.94 | 0.0 | 0.87   |
| 399.20 | 0.2 | 5.55   |
| 400.27 | 0.0 | 0.56   |
| 401.27 | 0.0 | 1.17   |
| 408.11 | 0.0 | 0.93   |
| 408.29 | 0.0 | 0.84   |
| 430.31 | 0.1 | 3.60   |
| 440.18 | 0.9 | 28.78  |
| 441.05 | 0.0 | 1.36   |
| 441.23 | 0.1 | 1.82   |
| 442.19 | 0.2 | 7.15   |
| 442.45 | 0.0 | 0.57   |
| 443.24 | 0.0 | 1.10   |
| 472.24 | 3.2 | 100.00 |
| 473.24 | 0.5 | 16.90  |

HMG 34 Mass spectral peak lists

SPECTRUM - MS

12-18-13\_HMG34\_1011\_MS2\_01.raw

ITMS + p ESI E Full ms2 1011.60@cid35.00 [275.00-2000.00]

Scan #: 1-21

RT: 0.00-5.11

AV: 21

| m/z     | Intensity | Relative      |
|---------|-----------|---------------|
| 433.29  | 715.3     | 39.23         |
| 434.29  | 138.3     | 7.58          |
| 534.40  | 75.4      | 4.14          |
| 738.49  | 1020.4    | 55.97         |
| 739.49  | 398.5     | 21.86         |
| 740.50  | 101.2     | 5.55          |
| 760.44  | 149.7     | 8.21          |
| 768.99  | 114.7     | 6.29          |
| 769.47  | 96.9      | 5.32          |
| 776.48  | 419.0     | 22.98         |
| 778.47  | 1340.1    | 73.50         |
| 780.47  | 752.5     | 41.27         |
| 805.99  | 273.3     | 14.99         |
| 806.48  | 242.6     | 13.31         |
| 806.99  | 121.9     | 6.68          |
| 834.46  | 1252.3    | 68.68         |
| 835.47  | 498.3     | 27.33         |
| 836.47  | 196.6     | 10.78         |
| 873.48  | 82.0      | 4.50          |
| 874.45  | 72.6      | 3.98          |
| 892.37  | 326.1     | 17.89         |
| 894.35  | 660.9     | 36.25         |
| 896.31  | 231.2     | 12.68         |
| 917.04  | 84.5      | 4.63          |
| 917.54  | 87.4      | 4.79          |
| 950.31  | 119.3     | 6.54          |
| 952.30  | 572.1     | 31.38         |
| 953.37  | 107.0     | 5.87          |
| 954.28  | 316.5     | 17.36         |
| 979.46  | 82.8      | 4.54          |
| 982.37  | 72.2      | 3.96          |
| 1010.33 |           | 707.0 38.78   |
| 1011.18 |           | 1190.3 65.28  |
| 1011.58 |           | 1097.9 60.22  |
| 1012.08 |           | 1081.7 59.33  |
| 1012.52 |           | 355.5 19.50   |
| 1187.65 |           | 1823.2 100.00 |
| 1188.65 |           | 1124.5 61.68  |
| 1189.62 |           | 415.6 22.79   |
| 1190.63 |           | 101.9 5.59    |
| 1283.64 |           | 328.0 17.99   |

|         |       |       |
|---------|-------|-------|
| 1284.64 | 210.1 | 11.52 |
| 1285.62 | 79.3  | 4.35  |
| 1588.81 | 760.3 | 41.70 |
| 1589.81 | 629.2 | 34.51 |
| 1590.81 | 302.3 | 16.58 |
| 1591.82 | 100.8 | 5.53  |
| 1881.62 | 82.9  | 4.55  |
| 1883.61 | 105.9 | 5.81  |
| 1885.60 | 70.8  | 3.88  |

SPECTRUM - MS

12-18-13\_HMG34\_1011\_MS3\_1283\_01.raw

ITMS + p ESI E Full ms3 1011.60@cid35.00 1284.00@cid35.00 [350.00-1300.00]

Scan #: 1-20

RT: 0.00-3.19

AV: 20

m/z Intensity Relative

|        |      |       |
|--------|------|-------|
| 415.25 | 0.2  | 0.39  |
| 424.20 | 0.5  | 1.01  |
| 433.25 | 3.3  | 6.81  |
| 434.26 | 0.5  | 1.09  |
| 442.22 | 0.1  | 0.16  |
| 472.29 | 5.5  | 11.23 |
| 473.28 | 1.1  | 2.28  |
| 500.27 | 0.1  | 0.18  |
| 572.24 | 0.2  | 0.33  |
| 611.18 | 0.1  | 0.19  |
| 611.37 | 0.1  | 0.21  |
| 612.32 | 0.1  | 0.16  |
| 628.38 | 0.1  | 0.28  |
| 642.32 | 0.1  | 0.16  |
| 646.36 | 0.4  | 0.78  |
| 660.41 | 0.1  | 0.26  |
| 667.36 | 0.2  | 0.36  |
| 685.41 | 0.2  | 0.49  |
| 686.39 | 0.1  | 0.19  |
| 716.38 | 0.6  | 1.15  |
| 717.41 | 0.1  | 0.30  |
| 760.40 | 2.0  | 4.18  |
| 761.42 | 0.5  | 1.11  |
| 799.33 | 2.7  | 5.52  |
| 799.52 | 1.9  | 3.86  |
| 800.41 | 1.1  | 2.20  |
| 801.37 | 0.1  | 0.18  |
| 801.52 | 0.1  | 0.21  |
| 831.34 | 0.3  | 0.70  |
| 831.55 | 0.4  | 0.90  |
| 832.53 | 0.1  | 0.27  |
| 834.45 | 36.1 | 73.61 |
| 835.46 | 9.7  | 19.86 |



|         |      |        |       |
|---------|------|--------|-------|
| 836.45  | 1.3  | 2.63   |       |
| 873.45  | 49.0 | 100.00 |       |
| 874.46  | 15.5 | 31.71  |       |
| 875.48  | 2.2  | 4.40   |       |
| 1056.46 |      | 0.2    | 0.31  |
| 1056.69 |      | 0.1    | 0.17  |
| 1095.64 |      | 0.2    | 0.48  |
| 1096.59 |      | 0.1    | 0.28  |
| 1126.58 |      | 1.6    | 3.32  |
| 1127.48 |      | 0.4    | 0.92  |
| 1127.69 |      | 0.3    | 0.63  |
| 1241.69 |      | 0.1    | 0.22  |
| 1253.61 |      | 0.2    | 0.48  |
| 1254.55 |      | 0.1    | 0.18  |
| 1283.65 |      | 9.1    | 18.62 |
| 1284.65 |      | 6.2    | 12.67 |
| 1285.62 |      | 1.6    | 3.22  |

SPECTRUM - MS

12-18-13\_HMG34\_1011\_MS4\_1283\_472\_01.raw

ITMS + p ESI E Full ms4 1011.60@cid35.00 1284.00@cid35.00 473.00@cid35.00 [130.00-500.00]

Scan #: 1-50

RT: 0.00-14.35

AV: 50

m/z Intensity Relative

|        |     |        |
|--------|-----|--------|
| 141.35 | 0.0 | 1.07   |
| 148.96 | 0.0 | 1.63   |
| 171.05 | 0.0 | 4.51   |
| 187.85 | 0.0 | 1.00   |
| 188.01 | 0.0 | 1.65   |
| 188.15 | 0.0 | 1.09   |
| 189.99 | 0.0 | 1.65   |
| 194.02 | 0.0 | 2.08   |
| 204.04 | 0.0 | 3.08   |
| 218.01 | 0.0 | 1.42   |
| 220.11 | 0.0 | 9.25   |
| 227.06 | 0.1 | 64.62  |
| 228.22 | 0.0 | 2.45   |
| 236.06 | 0.0 | 11.67  |
| 243.16 | 0.0 | 1.94   |
| 245.10 | 0.1 | 37.06  |
| 246.08 | 0.0 | 2.52   |
| 249.97 | 0.0 | 1.16   |
| 268.13 | 0.2 | 100.00 |
| 269.13 | 0.0 | 4.16   |
| 270.05 | 0.0 | 1.52   |
| 283.20 | 0.0 | 1.24   |
| 287.13 | 0.0 | 1.08   |
| 315.15 | 0.2 | 80.39  |
| 316.07 | 0.0 | 3.10   |

|        |     |       |
|--------|-----|-------|
| 316.24 | 0.0 | 3.31  |
| 317.33 | 0.0 | 1.24  |
| 324.23 | 0.0 | 1.11  |
| 357.10 | 0.0 | 1.19  |
| 365.86 | 0.0 | 1.21  |
| 368.19 | 0.0 | 1.92  |
| 369.26 | 0.0 | 1.55  |
| 374.88 | 0.0 | 1.21  |
| 380.01 | 0.0 | 2.35  |
| 380.22 | 0.0 | 5.59  |
| 397.65 | 0.0 | 1.19  |
| 398.22 | 0.0 | 10.76 |
| 399.20 | 0.0 | 2.56  |
| 401.30 | 0.0 | 3.29  |
| 430.23 | 0.0 | 4.68  |
| 440.23 | 0.0 | 16.92 |
| 441.17 | 0.0 | 4.26  |
| 442.11 | 0.0 | 4.75  |
| 442.30 | 0.0 | 7.43  |
| 472.20 | 0.1 | 29.95 |
| 472.37 | 0.1 | 33.45 |
| 472.60 | 0.0 | 1.38  |
| 473.21 | 0.0 | 7.00  |
| 473.37 | 0.0 | 2.82  |
| 474.12 | 0.0 | 1.24  |

SPECTRUM - MS

12-18-13\_HMG34\_1011\_MS4\_1283\_834\_01.raw

ITMS + p ESI E Full ms4 1011.60@cid35.00 1284.00@cid35.00 835.00@cid35.00 [225.00-900.00]

Scan #: 1-50

RT: 0.00-8.74

AV: 50

m/z Intensity Relative

|        |     |        |
|--------|-----|--------|
| 245.09 | 0.1 | 1.58   |
| 323.22 | 0.0 | 0.49   |
| 353.16 | 0.1 | 1.39   |
| 364.16 | 0.1 | 1.32   |
| 368.17 | 0.1 | 1.49   |
| 383.21 | 0.0 | 0.91   |
| 387.26 | 0.0 | 0.68   |
| 400.27 | 0.0 | 0.60   |
| 401.23 | 0.0 | 0.57   |
| 415.23 | 0.3 | 8.16   |
| 416.25 | 0.1 | 1.45   |
| 424.27 | 0.1 | 1.48   |
| 426.29 | 0.0 | 0.71   |
| 431.25 | 0.1 | 1.31   |
| 433.24 | 4.3 | 100.00 |
| 434.32 | 0.4 | 8.51   |
| 435.31 | 0.0 | 0.68   |

|        |     |       |
|--------|-----|-------|
| 442.25 | 0.2 | 4.24  |
| 443.28 | 0.0 | 0.94  |
| 572.31 | 0.2 | 3.67  |
| 573.37 | 0.0 | 1.05  |
| 586.39 | 0.0 | 0.86  |
| 621.32 | 0.0 | 0.80  |
| 628.41 | 0.0 | 0.46  |
| 629.36 | 0.0 | 0.42  |
| 632.31 | 0.0 | 0.49  |
| 644.38 | 0.0 | 0.51  |
| 646.34 | 1.8 | 43.44 |
| 647.34 | 0.4 | 9.97  |
| 648.38 | 0.0 | 1.07  |
| 660.35 | 0.0 | 0.79  |
| 689.31 | 0.0 | 1.05  |
| 689.47 | 0.0 | 1.03  |
| 690.32 | 0.0 | 0.44  |
| 744.38 | 0.0 | 0.71  |
| 758.51 | 0.0 | 0.55  |
| 760.39 | 2.0 | 46.53 |
| 761.42 | 0.6 | 13.84 |
| 762.27 | 0.0 | 1.01  |
| 762.49 | 0.0 | 0.81  |
| 763.40 | 0.1 | 3.06  |
| 764.34 | 0.0 | 0.76  |
| 788.41 | 0.1 | 2.11  |
| 789.49 | 0.0 | 0.45  |
| 792.42 | 0.4 | 9.54  |
| 793.50 | 0.1 | 2.21  |
| 794.52 | 0.0 | 0.46  |
| 804.41 | 0.0 | 0.62  |
| 834.44 | 0.6 | 13.72 |
| 835.44 | 0.2 | 3.73  |

SPECTRUM - MS

12-18-13\_HMG34\_1011\_MS5\_1283\_834\_646\_03.raw

ITMS + p ESI E Full ms5 1011.60@cid35.00 1284.00@cid35.00 835.00@cid35.00 647.00@cid35.00  
[175.00-700.00]

Scan #: 1-36

RT: 0.00-92.38

AV: 36

| m/z    | Intensity | Relative |
|--------|-----------|----------|
| 193.56 | 0.0       | 2.24     |
| 196.96 | 0.0       | 3.87     |
| 220.04 | 0.0       | 3.73     |
| 229.07 | 0.0       | 5.17     |
| 234.07 | 0.0       | 2.32     |
| 236.04 | 0.0       | 3.50     |
| 245.10 | 0.0       | 34.72    |
| 266.16 | 0.0       | 2.21     |

|        |     |        |
|--------|-----|--------|
| 270.77 | 0.0 | 1.00   |
| 283.99 | 0.0 | 3.10   |
| 287.18 | 0.0 | 2.11   |
| 291.99 | 0.0 | 2.34   |
| 332.16 | 0.0 | 3.41   |
| 350.13 | 0.0 | 3.29   |
| 364.22 | 0.0 | 4.11   |
| 368.21 | 0.0 | 8.20   |
| 368.39 | 0.0 | 3.79   |
| 369.26 | 0.0 | 2.60   |
| 382.13 | 0.0 | 5.88   |
| 384.10 | 0.0 | 3.25   |
| 384.29 | 0.0 | 2.29   |
| 385.04 | 0.0 | 1.13   |
| 392.22 | 0.0 | 3.55   |
| 398.23 | 0.0 | 6.92   |
| 415.16 | 0.0 | 1.95   |
| 417.32 | 0.0 | 1.64   |
| 424.19 | 0.0 | 18.52  |
| 426.02 | 0.0 | 1.86   |
| 426.17 | 0.0 | 2.86   |
| 426.35 | 0.0 | 9.03   |
| 433.34 | 0.0 | 58.56  |
| 434.26 | 0.0 | 23.40  |
| 436.21 | 0.0 | 7.38   |
| 440.38 | 0.0 | 3.84   |
| 442.24 | 0.0 | 2.13   |
| 458.17 | 0.0 | 2.00   |
| 458.34 | 0.0 | 4.41   |
| 459.27 | 0.0 | 3.56   |
| 466.14 | 0.0 | 1.39   |
| 475.17 | 0.0 | 0.85   |
| 540.40 | 0.0 | 4.29   |
| 565.68 | 0.0 | 5.12   |
| 572.35 | 0.0 | 100.00 |
| 573.27 | 0.0 | 30.22  |
| 574.23 | 0.0 | 0.86   |
| 582.30 | 0.0 | 1.51   |
| 626.05 | 0.0 | 2.43   |
| 646.25 | 0.0 | 95.49  |
| 646.45 | 0.0 | 86.83  |
| 647.28 | 0.0 | 23.39  |

# HMG 37 Mass spectral peak lists

## SPECTRUM - MS

6-26-13\_HMG37\_1011\_MS2\_02.raw

ITMS + p ESI E Full ms2 1011.60@cid35.00 [275.00-2000.00]

Scan #: 1-20

RT: 0.00-1.55

AV: 20

| m/z     | Intensity | Relative |
|---------|-----------|----------|
| 433.30  | 28716.4   | 38.54    |
| 434.31  | 4676.4    | 6.28     |
| 486.32  | 2698.7    | 3.62     |
| 534.40  | 1391.7    | 1.87     |
| 586.38  | 4698.6    | 6.31     |
| 587.38  | 1209.2    | 1.62     |
| 646.41  | 1306.8    | 1.75     |
| 660.43  | 51329.6   | 68.88    |
| 661.44  | 13649.5   | 18.32    |
| 662.45  | 1844.4    | 2.48     |
| 692.48  | 22424.2   | 30.09    |
| 692.98  | 14223.9   | 19.09    |
| 693.49  | 4790.4    | 6.43     |
| 738.51  | 21111.9   | 28.33    |
| 739.51  | 6866.9    | 9.22     |
| 769.02  | 3966.7    | 5.32     |
| 769.52  | 2978.3    | 4.00     |
| 780.54  | 27979.9   | 37.55    |
| 781.05  | 4362.2    | 5.85     |
| 806.03  | 18458.6   | 24.77    |
| 806.53  | 13597.0   | 18.25    |
| 807.03  | 5356.9    | 7.19     |
| 857.05  | 1273.8    | 1.71     |
| 893.09  | 1730.7    | 2.32     |
| 893.59  | 1421.6    | 1.91     |
| 894.09  | 6152.8    | 8.26     |
| 894.58  | 1222.2    | 1.64     |
| 908.08  | 1844.9    | 2.48     |
| 908.59  | 1615.0    | 2.17     |
| 909.10  | 1863.5    | 2.50     |
| 917.11  | 1532.7    | 2.06     |
| 917.60  | 1306.7    | 1.75     |
| 918.11  | 1548.1    | 2.08     |
| 1011.20 | 18227.7   | 24.46    |
| 1011.68 | 20518.6   | 27.54    |
| 1012.16 | 20340.8   | 27.30    |
| 1012.64 | 3167.8    | 4.25     |
| 1155.73 | 1596.9    | 2.14     |
| 1253.72 | 1206.6    | 1.62     |
| 1283.76 | 6509.7    | 8.74     |
| 1284.77 | 3453.6    | 4.63     |

|         |         |        |
|---------|---------|--------|
| 1361.84 | 74515.5 | 100.00 |
| 1362.85 | 46684.4 | 62.65  |
| 1363.86 | 15180.1 | 20.37  |
| 1537.98 | 8534.9  | 11.45  |
| 1538.98 | 1416.8  | 1.90   |
| 1588.98 | 26707.5 | 35.84  |
| 1589.99 | 19521.4 | 26.20  |
| 1590.99 | 7857.2  | 10.54  |
| 1765.15 | 1830.7  | 2.46   |

SPECTRUM - MS

6-26-13\_HMG37\_1011\_MS3\_1283\_01.raw

ITMS + p ESI E Full ms3 1011.60@cid35.00 1284.00@cid35.00 [350.00-1300.00]

Scan #: 1-50

RT: 0.00-4.05

AV: 50

m/z Intensity Relative

|        |       |        |
|--------|-------|--------|
| 385.26 | 1.7   | 0.45   |
| 398.26 | 1.3   | 0.33   |
| 424.29 | 1.1   | 0.28   |
| 433.29 | 25.2  | 6.56   |
| 434.22 | 2.1   | 0.55   |
| 434.40 | 1.5   | 0.39   |
| 470.30 | 2.3   | 0.59   |
| 472.35 | 1.8   | 0.48   |
| 524.34 | 2.5   | 0.65   |
| 572.38 | 4.4   | 1.14   |
| 573.46 | 1.0   | 0.27   |
| 575.43 | 1.2   | 0.31   |
| 586.35 | 8.7   | 2.27   |
| 587.43 | 1.4   | 0.37   |
| 598.35 | 11.8  | 3.08   |
| 599.45 | 3.0   | 0.78   |
| 646.42 | 144.6 | 37.72  |
| 647.43 | 32.0  | 8.34   |
| 660.44 | 154.4 | 40.26  |
| 661.45 | 41.4  | 10.79  |
| 669.45 | 1.4   | 0.37   |
| 799.47 | 33.2  | 8.65   |
| 800.50 | 11.0  | 2.87   |
| 831.56 | 2.0   | 0.53   |
| 834.55 | 1.5   | 0.40   |
| 864.45 | 1.3   | 0.35   |
| 864.62 | 2.3   | 0.60   |
| 873.55 | 383.4 | 100.00 |
| 874.56 | 145.9 | 38.05  |
| 880.54 | 2.3   | 0.59   |
| 882.52 | 25.2  | 6.56   |
| 883.43 | 5.5   | 1.44   |
| 883.66 | 4.3   | 1.13   |

|         |     |      |      |
|---------|-----|------|------|
| 952.49  | 1.9 | 0.50 |      |
| 952.68  | 1.5 | 0.38 |      |
| 953.66  | 1.3 | 0.34 |      |
| 973.68  | 2.4 | 0.62 |      |
| 974.66  | 1.3 | 0.33 |      |
| 1047.66 |     | 35.2 | 9.18 |
| 1048.68 |     | 17.3 | 4.51 |
| 1077.62 |     | 1.3  | 0.34 |
| 1078.71 |     | 1.1  | 0.28 |
| 1079.62 |     | 10.9 | 2.86 |
| 1080.58 |     | 1.9  | 0.49 |
| 1080.79 |     | 1.7  | 0.45 |
| 1209.83 |     | 1.2  | 0.30 |
| 1241.68 |     | 1.2  | 0.30 |
| 1242.78 |     | 1.0  | 0.25 |
| 1283.87 |     | 21.2 | 5.52 |
| 1284.78 |     | 32.4 | 8.45 |

SPECTRUM - MS

6-26-13\_HMG37\_1011\_MS4\_1283\_660\_01.raw

ITMS + p ESI E Full ms4 1011.60@cid35.00 1284.00@cid35.00 661.00@cid35.00 [180.00-700.00]

Scan #: 1-50

RT: 0.00-5.55

AV: 50

| m/z    | Intensity | Relative |
|--------|-----------|----------|
| 201.04 | 0.3       | 0.47     |
| 245.06 | 0.5       | 0.72     |
| 245.21 | 0.8       | 1.10     |
| 250.07 | 0.2       | 0.34     |
| 250.19 | 0.3       | 0.44     |
| 258.94 | 0.4       | 0.60     |
| 259.14 | 1.3       | 1.93     |
| 260.13 | 0.2       | 0.36     |
| 313.24 | 0.2       | 0.33     |
| 323.25 | 0.3       | 0.39     |
| 353.24 | 0.3       | 0.43     |
| 370.35 | 0.2       | 0.26     |
| 383.28 | 1.0       | 1.41     |
| 387.18 | 0.2       | 0.33     |
| 387.32 | 0.3       | 0.44     |
| 389.82 | 0.2       | 0.26     |
| 398.25 | 1.3       | 1.97     |
| 399.29 | 0.4       | 0.60     |
| 412.25 | 0.3       | 0.38     |
| 415.34 | 5.1       | 7.47     |
| 416.21 | 0.3       | 0.50     |
| 416.39 | 0.2       | 0.35     |
| 431.29 | 2.0       | 2.86     |
| 432.38 | 0.3       | 0.44     |
| 433.30 | 68.3      | 100.00   |

|        |      |       |
|--------|------|-------|
| 434.30 | 7.7  | 11.30 |
| 437.83 | 0.3  | 0.49  |
| 442.22 | 0.4  | 0.52  |
| 443.44 | 0.2  | 0.36  |
| 455.24 | 0.2  | 0.32  |
| 472.33 | 8.0  | 11.77 |
| 473.27 | 0.8  | 1.12  |
| 473.46 | 0.2  | 0.32  |
| 500.22 | 0.3  | 0.50  |
| 515.20 | 0.3  | 0.46  |
| 516.47 | 0.2  | 0.36  |
| 556.48 | 0.2  | 0.31  |
| 558.24 | 1.9  | 2.76  |
| 586.40 | 37.2 | 54.48 |
| 587.38 | 6.1  | 8.98  |
| 589.40 | 0.7  | 1.09  |
| 614.48 | 0.3  | 0.49  |
| 618.43 | 7.5  | 11.03 |
| 619.33 | 0.4  | 0.58  |
| 619.46 | 0.3  | 0.48  |
| 652.34 | 0.2  | 0.26  |
| 660.33 | 2.0  | 2.99  |
| 660.54 | 1.9  | 2.77  |
| 661.53 | 0.4  | 0.61  |
| 661.69 | 0.2  | 0.25  |

SPECTRUM - MS

6-26-13\_HMG37\_1011\_MS4\_1283\_646\_01.raw

ITMS + p ESI E Full ms4 1011.60@cid35.00 1284.00@cid35.00 647.00@cid35.00 [175.00-700.00]

Scan #: 1-50

RT: 0.00-14.08

AV: 50

m/z Intensity Relative

|        |     |       |
|--------|-----|-------|
| 194.08 | 0.2 | 1.03  |
| 204.04 | 0.3 | 1.61  |
| 211.13 | 0.2 | 1.44  |
| 218.09 | 0.2 | 1.16  |
| 220.07 | 0.5 | 2.85  |
| 227.10 | 1.9 | 11.58 |
| 229.12 | 0.9 | 5.66  |
| 230.15 | 0.2 | 1.16  |
| 236.09 | 1.5 | 8.87  |
| 243.07 | 0.2 | 1.20  |
| 245.12 | 5.2 | 31.06 |
| 246.12 | 0.3 | 1.70  |
| 287.15 | 0.4 | 2.53  |
| 292.14 | 0.2 | 1.07  |
| 315.21 | 0.7 | 4.06  |
| 343.23 | 0.5 | 3.27  |
| 352.11 | 0.3 | 2.02  |



|        |      |        |
|--------|------|--------|
| 354.15 | 0.2  | 0.90   |
| 366.31 | 0.3  | 1.55   |
| 367.23 | 0.2  | 1.47   |
| 368.25 | 0.5  | 3.05   |
| 369.22 | 0.3  | 1.67   |
| 378.26 | 0.3  | 1.80   |
| 380.26 | 0.7  | 4.23   |
| 382.26 | 1.5  | 9.27   |
| 383.31 | 0.1  | 0.73   |
| 384.23 | 1.7  | 10.05  |
| 385.22 | 12.4 | 74.58  |
| 386.33 | 0.6  | 3.32   |
| 398.20 | 0.7  | 3.99   |
| 408.30 | 0.2  | 1.23   |
| 424.25 | 1.6  | 9.75   |
| 425.44 | 0.1  | 0.76   |
| 433.27 | 0.2  | 1.27   |
| 440.28 | 3.1  | 18.40  |
| 441.25 | 0.3  | 1.84   |
| 442.29 | 4.5  | 27.08  |
| 443.31 | 0.4  | 2.56   |
| 458.29 | 2.1  | 12.73  |
| 459.29 | 0.2  | 1.15   |
| 569.13 | 0.2  | 1.09   |
| 572.37 | 16.6 | 100.00 |
| 573.37 | 4.3  | 25.85  |
| 574.44 | 0.1  | 0.73   |
| 575.39 | 3.9  | 23.36  |
| 576.40 | 0.5  | 3.00   |
| 586.52 | 0.2  | 1.15   |
| 604.43 | 0.7  | 4.34   |
| 646.43 | 1.4  | 8.52   |
| 647.47 | 0.1  | 0.76   |

HMG 41 Mass spectral peak lists

SPECTRUM - MS

6-27-13\_HMG41\_1149\_MS2\_01.raw

ITMS + p ESI E Full ms2 1149.00@cid35.00 [315.00-2000.00]

Scan #: 1-20

RT: 0.00-1.90

AV: 20

| m/z     | Intensity | Relative |
|---------|-----------|----------|
| 486.31  | 1702.9    | 14.38    |
| 487.32  | 326.3     | 2.76     |
| 534.38  | 143.5     | 1.21     |
| 646.40  | 165.3     | 1.40     |
| 685.45  | 2022.5    | 17.08    |
| 685.97  | 1243.7    | 10.50    |
| 686.46  | 434.9     | 3.67     |
| 706.45  | 158.5     | 1.34     |
| 724.49  | 368.9     | 3.12     |
| 761.99  | 139.7     | 1.18     |
| 799.01  | 765.5     | 6.46     |
| 799.52  | 558.5     | 4.72     |
| 800.01  | 266.5     | 2.25     |
| 814.03  | 211.8     | 1.79     |
| 814.52  | 167.2     | 1.41     |
| 917.10  | 11841.5   | 100.00   |
| 917.60  | 9828.1    | 83.00    |
| 918.10  | 4342.0    | 36.67    |
| 918.62  | 380.8     | 3.22     |
| 954.29  | 282.9     | 2.39     |
| 993.61  | 348.3     | 2.94     |
| 994.10  | 310.5     | 2.62     |
| 994.62  | 162.9     | 1.38     |
| 1012.28 | 439.4     | 3.71     |
| 1030.66 | 3188.4    | 26.93    |
| 1031.16 | 2961.1    | 25.01    |
| 1031.66 | 1562.7    | 13.20    |
| 1032.29 | 282.7     | 2.39     |
| 1045.65 | 414.2     | 3.50     |
| 1046.13 | 382.6     | 3.23     |
| 1046.63 | 219.0     | 1.85     |
| 1054.65 | 212.9     | 1.80     |
| 1055.15 | 163.4     | 1.38     |
| 1109.65 | 255.0     | 2.15     |
| 1120.68 | 128.1     | 1.08     |
| 1148.71 | 3559.1    | 30.06    |
| 1149.21 | 3944.4    | 33.31    |
| 1149.70 | 2593.5    | 21.90    |
| 1150.21 | 260.3     | 2.20     |
| 1187.71 | 340.4     | 2.87     |
| 1188.72 | 177.7     | 1.50     |

|         |        |       |
|---------|--------|-------|
| 1347.82 | 1490.8 | 12.59 |
| 1348.82 | 931.5  | 7.87  |
| 1349.83 | 301.1  | 2.54  |
| 1574.95 | 471.9  | 3.99  |
| 1575.95 | 353.8  | 2.99  |
| 1576.97 | 137.7  | 1.16  |
| 1811.18 | 2432.2 | 20.54 |
| 1812.19 | 1998.2 | 16.87 |
| 1813.20 | 874.0  | 7.38  |

SPECTRUM - MS

6-27-13\_HMG41\_1149\_MS3\_1109\_01.raw

ITMS + p ESI E Full ms3 1149.00@cid35.00 1110.00@cid35.00 [305.00-1200.00]

Scan #: 1-20

RT: 0.00-3.63

AV: 20

| m/z | Intensity | Relative |
|-----|-----------|----------|
|-----|-----------|----------|

|        |      |        |
|--------|------|--------|
| 343.20 | 0.1  | 0.31   |
| 382.36 | 0.1  | 0.49   |
| 385.22 | 1.0  | 3.58   |
| 398.27 | 0.4  | 1.35   |
| 412.30 | 0.1  | 0.39   |
| 424.25 | 0.1  | 0.40   |
| 440.26 | 0.2  | 0.54   |
| 442.37 | 0.1  | 0.30   |
| 458.22 | 0.1  | 0.38   |
| 472.28 | 0.3  | 1.18   |
| 486.30 | 4.9  | 17.30  |
| 487.34 | 0.7  | 2.60   |
| 572.33 | 0.6  | 2.18   |
| 573.32 | 0.2  | 0.55   |
| 575.34 | 0.4  | 1.47   |
| 576.45 | 0.1  | 0.30   |
| 598.26 | 0.2  | 0.86   |
| 598.43 | 0.2  | 0.54   |
| 599.35 | 0.1  | 0.29   |
| 646.39 | 28.4 | 100.00 |
| 647.41 | 5.6  | 19.58  |
| 685.33 | 0.1  | 0.29   |
| 690.37 | 0.3  | 1.11   |
| 690.57 | 0.1  | 0.29   |
| 708.51 | 1.1  | 3.74   |
| 709.42 | 0.5  | 1.92   |
| 778.45 | 0.2  | 0.60   |
| 778.57 | 0.1  | 0.38   |
| 799.44 | 2.6  | 9.09   |
| 799.74 | 0.3  | 1.12   |
| 800.43 | 0.4  | 1.43   |
| 800.62 | 0.2  | 0.61   |
| 830.47 | 0.1  | 0.30   |

|         |      |           |
|---------|------|-----------|
| 843.53  | 0.1  | 0.38      |
| 873.52  | 19.0 | 66.65     |
| 874.52  | 5.2  | 18.25     |
| 891.65  | 0.1  | 0.31      |
| 903.62  | 0.1  | 0.48      |
| 905.49  | 1.0  | 3.49      |
| 906.43  | 0.1  | 0.30      |
| 916.07  | 0.1  | 0.33      |
| 921.42  | 0.1  | 0.52      |
| 921.67  | 0.2  | 0.69      |
| 931.07  | 0.1  | 0.27      |
| 1015.60 |      | 0.3 0.90  |
| 1035.62 |      | 0.3 1.04  |
| 1051.83 |      | 0.1 0.27  |
| 1067.56 |      | 0.3 0.96  |
| 1109.64 |      | 7.7 26.99 |
| 1110.63 |      | 4.4 15.32 |

SPECTRUM - MS

6-27-13\_HMG41\_1149\_MS4\_1109\_486\_01.raw

ITMS + p ESI E Full ms4 1149.00@cid35.00 1110.00@cid35.00 487.00@cid35.00 [130.00-500.00]

Scan #: 1-50

RT: 0.00-10.18

AV: 50

m/z Intensity Relative

|        |     |       |
|--------|-----|-------|
| 154.99 | 0.0 | 2.83  |
| 164.27 | 0.0 | 0.84  |
| 176.04 | 0.0 | 0.88  |
| 180.10 | 0.0 | 0.97  |
| 208.07 | 0.0 | 3.90  |
| 224.41 | 0.0 | 1.70  |
| 227.25 | 0.0 | 1.33  |
| 232.32 | 0.0 | 0.75  |
| 241.14 | 0.0 | 6.84  |
| 241.78 | 0.0 | 1.15  |
| 249.95 | 0.0 | 1.28  |
| 250.17 | 0.0 | 2.15  |
| 250.79 | 0.0 | 1.07  |
| 251.15 | 0.0 | 1.17  |
| 251.84 | 0.0 | 0.77  |
| 252.16 | 0.0 | 10.17 |
| 259.13 | 0.4 | 85.09 |
| 260.12 | 0.0 | 10.57 |
| 268.09 | 0.0 | 2.57  |
| 292.43 | 0.0 | 1.36  |
| 316.28 | 0.0 | 1.46  |
| 329.16 | 0.0 | 8.44  |
| 329.36 | 0.0 | 4.89  |
| 330.25 | 0.0 | 1.32  |
| 338.55 | 0.0 | 0.78  |

|        |     |        |
|--------|-----|--------|
| 341.16 | 0.0 | 1.05   |
| 345.49 | 0.0 | 0.74   |
| 370.21 | 0.0 | 2.25   |
| 376.12 | 0.0 | 1.70   |
| 382.13 | 0.0 | 2.50   |
| 382.32 | 0.0 | 1.43   |
| 383.74 | 0.0 | 1.11   |
| 383.99 | 0.0 | 0.89   |
| 384.17 | 0.0 | 3.76   |
| 409.41 | 0.0 | 1.77   |
| 412.25 | 0.5 | 100.00 |
| 413.16 | 0.0 | 8.54   |
| 413.37 | 0.0 | 5.07   |
| 444.35 | 0.1 | 28.19  |
| 445.35 | 0.0 | 8.68   |
| 454.29 | 0.0 | 1.50   |
| 455.96 | 0.0 | 0.77   |
| 456.33 | 0.0 | 0.96   |
| 456.50 | 0.0 | 1.98   |
| 486.07 | 0.0 | 1.83   |
| 486.40 | 0.0 | 10.86  |
| 486.96 | 0.0 | 2.35   |
| 487.26 | 0.0 | 3.45   |
| 487.51 | 0.0 | 0.89   |
| 498.45 | 0.0 | 1.68   |

SPECTRUM - MS

6-27-13\_HMG41\_1149\_MS4\_1109\_646\_02.raw

ITMS + p ESI E Full ms4 1149.00@cid35.00 1110.00@cid35.00 647.00@cid35.00 [175.00-700.00]

Scan #: 1-60

RT: 0.00-12.71

AV: 60

m/z Intensity Relative

|        |     |       |
|--------|-----|-------|
| 194.07 | 0.0 | 0.64  |
| 204.02 | 0.0 | 1.23  |
| 211.08 | 0.0 | 1.14  |
| 219.95 | 0.0 | 0.57  |
| 227.09 | 0.3 | 11.59 |
| 228.07 | 0.0 | 0.54  |
| 229.11 | 0.1 | 4.25  |
| 230.11 | 0.0 | 0.57  |
| 236.09 | 0.2 | 8.39  |
| 243.00 | 0.0 | 1.06  |
| 243.23 | 0.0 | 0.59  |
| 245.12 | 0.8 | 28.50 |
| 287.18 | 0.0 | 1.36  |
| 311.24 | 0.0 | 0.74  |
| 315.22 | 0.1 | 4.11  |
| 316.22 | 0.0 | 0.67  |
| 324.14 | 0.0 | 1.29  |

|        |     |        |
|--------|-----|--------|
| 343.20 | 0.1 | 3.11   |
| 353.27 | 0.0 | 0.91   |
| 366.06 | 0.0 | 0.83   |
| 366.23 | 0.1 | 2.37   |
| 367.17 | 0.1 | 2.17   |
| 368.24 | 0.1 | 2.80   |
| 369.20 | 0.0 | 1.25   |
| 371.19 | 0.0 | 1.05   |
| 378.22 | 0.1 | 4.79   |
| 380.22 | 0.1 | 4.75   |
| 382.24 | 0.2 | 7.90   |
| 384.27 | 0.1 | 4.59   |
| 385.20 | 2.6 | 100.00 |
| 386.24 | 0.2 | 5.84   |
| 392.18 | 0.0 | 0.55   |
| 397.26 | 0.0 | 0.59   |
| 398.20 | 0.0 | 1.81   |
| 424.27 | 0.2 | 6.43   |
| 433.30 | 0.0 | 1.61   |
| 440.26 | 0.6 | 21.90  |
| 441.24 | 0.1 | 2.62   |
| 442.27 | 0.5 | 18.79  |
| 443.30 | 0.1 | 3.12   |
| 458.28 | 0.3 | 10.05  |
| 572.35 | 2.1 | 79.72  |
| 573.34 | 0.6 | 23.23  |
| 574.35 | 0.1 | 1.95   |
| 574.54 | 0.0 | 0.58   |
| 575.37 | 0.8 | 30.67  |
| 576.38 | 0.1 | 4.94   |
| 604.47 | 0.1 | 3.70   |
| 646.39 | 0.6 | 23.40  |
| 647.35 | 0.1 | 2.79   |

SPECTRUM - MS

6-27-13\_HMG41\_1149\_MS3\_486\_01.raw

ITMS + p ESI E Full ms3 1149.00@cid35.00 487.00@cid35.00 [130.00-500.00]

Scan #: 1-20

RT: 0.00-2.22

AV: 20

m/z Intensity Relative

|        |     |      |
|--------|-----|------|
| 168.18 | 0.3 | 0.33 |
| 178.08 | 0.8 | 0.77 |
| 208.08 | 5.3 | 5.01 |
| 211.07 | 0.3 | 0.24 |
| 218.10 | 0.4 | 0.33 |
| 220.09 | 0.3 | 0.27 |
| 241.09 | 4.6 | 4.37 |
| 242.18 | 0.4 | 0.37 |
| 250.12 | 9.4 | 8.94 |

|        |       |        |
|--------|-------|--------|
| 251.12 | 0.9   | 0.81   |
| 252.14 | 12.0  | 11.44  |
| 253.21 | 0.6   | 0.61   |
| 257.09 | 0.8   | 0.76   |
| 257.26 | 0.5   | 0.51   |
| 259.13 | 99.6  | 94.84  |
| 260.15 | 7.5   | 7.13   |
| 268.15 | 4.3   | 4.11   |
| 281.15 | 1.2   | 1.17   |
| 282.13 | 0.6   | 0.62   |
| 301.21 | 0.6   | 0.56   |
| 312.21 | 0.4   | 0.37   |
| 314.19 | 0.9   | 0.82   |
| 329.20 | 4.2   | 4.00   |
| 330.25 | 0.6   | 0.53   |
| 341.15 | 1.2   | 1.10   |
| 356.21 | 0.3   | 0.32   |
| 356.37 | 0.5   | 0.52   |
| 370.30 | 0.5   | 0.43   |
| 380.23 | 0.4   | 0.41   |
| 382.35 | 1.3   | 1.27   |
| 384.21 | 3.8   | 3.65   |
| 385.22 | 0.3   | 0.26   |
| 394.31 | 0.3   | 0.32   |
| 408.38 | 0.3   | 0.27   |
| 410.24 | 0.9   | 0.83   |
| 412.26 | 105.0 | 100.00 |
| 413.26 | 18.6  | 17.74  |
| 414.32 | 0.6   | 0.54   |
| 415.27 | 2.0   | 1.94   |
| 426.33 | 0.9   | 0.87   |
| 427.23 | 0.7   | 0.62   |
| 440.21 | 1.7   | 1.58   |
| 444.30 | 59.8  | 56.93  |
| 445.29 | 9.0   | 8.60   |
| 454.42 | 0.4   | 0.42   |
| 455.30 | 0.3   | 0.24   |
| 456.34 | 2.9   | 2.73   |
| 457.37 | 1.2   | 1.16   |
| 486.30 | 101.2 | 96.36  |
| 487.31 | 22.2  | 21.12  |

HMG 45 Mass spectral peak lists

SPECTRUM - MS

10-23-13\_HMG45\_1062\_MS2\_01.raw

ITMS + p ESI E Full ms2 1062.40@cid35.00 [290.00-2000.00]

Scan #: 1-20

RT: 0.00-1.60

AV: 20

| m/z     | Intensity | Relative |
|---------|-----------|----------|
| 444.27  | 224.9     | 1.18     |
| 486.27  | 7201.0    | 37.91    |
| 487.28  | 1541.0    | 8.11     |
| 488.29  | 275.1     | 1.45     |
| 534.33  | 571.5     | 3.01     |
| 598.33  | 260.7     | 1.37     |
| 738.42  | 5583.8    | 29.40    |
| 739.43  | 1993.1    | 10.49    |
| 740.43  | 513.5     | 2.70     |
| 829.98  | 18993.3   | 100.00   |
| 830.47  | 14735.0   | 77.58    |
| 830.97  | 7018.8    | 36.95    |
| 831.47  | 2308.0    | 12.15    |
| 831.97  | 637.4     | 3.36     |
| 906.47  | 250.8     | 1.32     |
| 906.97  | 228.5     | 1.20     |
| 921.46  | 895.4     | 4.71     |
| 922.46  | 396.3     | 2.09     |
| 943.50  | 732.3     | 3.86     |
| 944.01  | 705.1     | 3.71     |
| 944.51  | 465.2     | 2.45     |
| 952.49  | 441.1     | 2.32     |
| 952.99  | 427.3     | 2.25     |
| 953.51  | 235.2     | 1.24     |
| 983.52  | 412.6     | 2.17     |
| 984.54  | 209.1     | 1.10     |
| 1008.52 | 252.0     | 1.33     |
| 1009.02 | 251.9     | 1.33     |
| 1012.03 | 262.9     | 1.38     |
| 1012.52 | 272.2     | 1.43     |
| 1045.54 | 367.1     | 1.93     |
| 1046.01 | 388.6     | 2.05     |
| 1046.53 | 370.9     | 1.95     |
| 1047.04 | 233.8     | 1.23     |
| 1061.60 | 3478.4    | 18.31    |
| 1062.07 | 3638.7    | 19.16    |
| 1062.56 | 2320.4    | 12.22    |
| 1063.06 | 1157.1    | 6.09     |
| 1063.54 | 523.5     | 2.76     |
| 1173.57 | 3420.2    | 18.01    |
| 1174.58 | 2010.7    | 10.59    |



|         |        |      |       |
|---------|--------|------|-------|
| 1175.59 | 718.9  | 3.79 |       |
| 1187.61 | 244.3  | 1.29 |       |
| 1384.66 | 2083.6 |      | 10.97 |
| 1385.67 | 1322.3 |      | 6.96  |
| 1386.66 | 505.8  | 2.66 |       |
| 1636.82 | 5276.9 |      | 27.78 |
| 1637.83 | 4135.2 |      | 21.77 |
| 1638.84 | 1966.2 |      | 10.35 |
| 1639.84 | 624.4  | 3.29 |       |

SPECTRUM - MS

10-23-13\_HMG45\_1062\_MS3\_830\_01.raw

ITMS + p ESI E Full ms3 1062.40@cid35.00 830.40@cid35.00 [225.00-1800.00]

Scan #: 1-20

RT: 0.00-2.17

AV: 20

| m/z | Intensity | Relative |
|-----|-----------|----------|
|-----|-----------|----------|

|        |        |       |
|--------|--------|-------|
| 444.26 | 50.8   | 4.55  |
| 458.23 | 50.3   | 4.51  |
| 464.23 | 13.4   | 1.20  |
| 472.25 | 17.7   | 1.58  |
| 486.27 | 1007.2 | 90.22 |
| 487.28 | 211.1  | 18.91 |
| 488.29 | 31.1   | 2.79  |
| 514.28 | 15.3   | 1.37  |
| 534.33 | 31.1   | 2.78  |
| 598.33 | 102.8  | 9.21  |
| 598.85 | 54.2   | 4.85  |
| 599.34 | 20.7   | 1.85  |
| 630.33 | 30.5   | 2.73  |
| 676.35 | 32.9   | 2.95  |
| 718.35 | 44.4   | 3.98  |
| 719.36 | 16.0   | 1.43  |
| 720.92 | 27.5   | 2.46  |
| 721.41 | 23.5   | 2.11  |
| 738.43 | 563.0  | 50.43 |
| 739.43 | 197.2  | 17.67 |
| 740.43 | 44.4   | 3.97  |
| 760.37 | 24.5   | 2.19  |
| 776.95 | 19.1   | 1.71  |
| 777.45 | 17.4   | 1.56  |
| 780.44 | 26.6   | 2.38  |
| 780.94 | 19.4   | 1.74  |
| 813.95 | 31.9   | 2.86  |
| 814.45 | 28.5   | 2.56  |
| 814.96 | 47.9   | 4.29  |
| 815.48 | 34.9   | 3.13  |
| 815.98 | 14.5   | 1.30  |
| 829.99 | 255.3  | 22.87 |
| 830.48 | 216.2  | 19.36 |

|         |        |       |        |
|---------|--------|-------|--------|
| 830.98  | 100.6  | 9.01  |        |
| 831.48  | 34.7   | 3.11  |        |
| 921.47  | 227.2  | 20.35 |        |
| 922.48  | 94.0   | 8.42  |        |
| 923.49  | 34.8   | 3.11  |        |
| 983.54  | 79.0   | 7.08  |        |
| 984.55  | 36.3   | 3.26  |        |
| 1065.49 |        | 80.0  | 7.16   |
| 1066.47 |        | 38.4  | 3.44   |
| 1173.59 | 1116.3 |       | 100.00 |
| 1174.60 | 619.0  | 55.45 |        |
| 1175.61 | 198.2  | 17.76 |        |
| 1176.62 | 34.2   | 3.06  |        |
| 1187.64 | 27.4   | 2.46  |        |
| 1188.63 | 15.8   | 1.42  |        |
| 1636.85 | 34.4   | 3.08  |        |
| 1637.85 | 28.8   | 2.58  |        |

SPECTRUM - MS

10-23-13\_HMG45\_1062\_MS4\_830\_1174\_01.raw

ITMS + p ESI E Full ms4 1062.40@cid35.00 830.40@cid35.00 1174.00@cid35.00 [320.00-1200.00]

Scan #: 1-20

RT: 0.00-1.81

AV: 20

| m/z    | Intensity | Relative |
|--------|-----------|----------|
| 384.28 | 0.9       | 0.11     |
| 435.25 | 5.2       | 0.68     |
| 444.25 | 0.5       | 0.06     |
| 447.18 | 0.7       | 0.09     |
| 447.35 | 0.5       | 0.06     |
| 456.31 | 1.2       | 0.16     |
| 458.23 | 3.5       | 0.45     |
| 470.37 | 0.5       | 0.07     |
| 472.30 | 1.0       | 0.13     |
| 474.33 | 1.4       | 0.18     |
| 486.29 | 5.8       | 0.76     |
| 487.35 | 0.9       | 0.12     |
| 492.37 | 0.5       | 0.06     |
| 502.31 | 1.5       | 0.19     |
| 516.33 | 2.1       | 0.27     |
| 517.37 | 0.5       | 0.07     |
| 534.33 | 119.3     | 15.60    |
| 535.35 | 22.7      | 2.97     |
| 536.35 | 2.6       | 0.33     |
| 562.35 | 1.2       | 0.16     |
| 590.35 | 2.4       | 0.31     |
| 591.28 | 0.5       | 0.07     |
| 620.39 | 0.6       | 0.07     |
| 639.37 | 14.3      | 1.87     |
| 640.39 | 2.8       | 0.37     |

|         |       |        |      |
|---------|-------|--------|------|
| 665.31  | 0.5   | 0.07   |      |
| 690.39  | 1.4   | 0.18   |      |
| 706.49  | 1.6   | 0.20   |      |
| 707.45  | 0.6   | 0.08   |      |
| 720.44  | 0.7   | 0.10   |      |
| 724.43  | 14.8  | 1.93   |      |
| 725.41  | 3.7   | 0.48   |      |
| 738.43  | 764.8 | 100.00 |      |
| 739.43  | 192.5 | 25.17  |      |
| 740.44  | 29.4  | 3.85   |      |
| 882.48  | 0.5   | 0.06   |      |
| 983.55  | 43.1  | 5.64   |      |
| 984.57  | 14.8  | 1.93   |      |
| 985.53  | 3.0   | 0.40   |      |
| 1067.60 |       | 1.3    | 0.17 |
| 1074.53 |       | 4.8    | 0.63 |
| 1075.56 |       | 2.1    | 0.27 |
| 1141.58 |       | 4.4    | 0.58 |
| 1142.44 |       | 0.9    | 0.12 |
| 1142.64 |       | 1.4    | 0.18 |
| 1143.53 |       | 0.9    | 0.11 |
| 1143.72 |       | 0.7    | 0.10 |
| 1173.60 |       | 59.1   | 7.72 |
| 1174.60 |       | 30.9   | 4.04 |
| 1175.62 |       | 10.9   | 1.43 |

SPECTRUM - MS

10-23-13\_HMG45\_1062\_MS3\_1384\_01.raw

ITMS + p ESI E Full ms3 1062.40@cid35.00 1385.40@cid35.00 [380.00-1400.00]

Scan #: 1-50

RT: 0.00-8.25

AV: 50

m/z Intensity Relative

|        |      |       |
|--------|------|-------|
| 458.23 | 68.3 | 10.63 |
| 459.24 | 10.0 | 1.56  |
| 486.26 | 96.5 | 15.01 |
| 487.28 | 14.5 | 2.26  |
| 488.25 | 1.8  | 0.28  |
| 546.23 | 2.0  | 0.31  |
| 546.43 | 2.6  | 0.40  |
| 574.34 | 8.8  | 1.37  |
| 620.33 | 3.3  | 0.52  |
| 676.36 | 11.8 | 1.84  |
| 677.27 | 1.6  | 0.24  |
| 677.46 | 1.5  | 0.24  |
| 694.33 | 7.2  | 1.12  |
| 695.26 | 1.5  | 0.23  |
| 703.44 | 1.7  | 0.26  |
| 764.40 | 21.5 | 3.34  |
| 765.37 | 5.8  | 0.90  |

|         |       |        |      |
|---------|-------|--------|------|
| 815.35  | 1.6   | 0.25   |      |
| 847.44  | 2.7   | 0.42   |      |
| 850.41  | 3.5   | 0.55   |      |
| 879.50  | 3.3   | 0.51   |      |
| 889.46  | 5.1   | 0.79   |      |
| 890.45  | 2.4   | 0.38   |      |
| 921.46  | 642.6 | 100.00 |      |
| 922.47  | 191.3 | 29.77  |      |
| 923.48  | 31.1  | 4.84   |      |
| 935.53  | 3.1   | 0.48   |      |
| 1139.40 |       | 2.3    | 0.36 |
| 1140.59 |       | 1.5    | 0.23 |
| 1157.56 |       | 11.4   | 1.77 |
| 1158.66 |       | 3.5    | 0.55 |
| 1166.62 |       | 4.3    | 0.67 |
| 1167.52 |       | 2.8    | 0.43 |
| 1227.57 |       | 48.7   | 7.57 |
| 1228.59 |       | 21.2   | 3.30 |
| 1229.71 |       | 2.1    | 0.33 |
| 1278.59 |       | 7.1    | 1.10 |
| 1279.62 |       | 4.3    | 0.68 |
| 1313.61 |       | 2.8    | 0.44 |
| 1342.62 |       | 4.6    | 0.72 |
| 1342.82 |       | 1.6    | 0.25 |
| 1343.67 |       | 3.1    | 0.48 |
| 1352.66 |       | 8.0    | 1.24 |
| 1353.75 |       | 1.5    | 0.24 |
| 1354.65 |       | 8.6    | 1.34 |
| 1355.70 |       | 2.6    | 0.41 |
| 1384.65 |       | 44.7   | 6.96 |
| 1385.56 |       | 16.8   | 2.62 |
| 1385.78 |       | 15.2   | 2.36 |
| 1386.68 |       | 10.2   | 1.59 |

SPECTRUM - MS

10-23-13\_HMG45\_1062\_MS4\_1384\_486\_01.raw

ITMS + p ESI E Full ms4 1062.40@cid35.00 1385.40@cid35.00 487.00@cid35.00 [130.00-500.00]

Scan #: 1-50

RT: 0.00-8.09

AV: 50

| m/z    | Intensity | Relative |
|--------|-----------|----------|
| 180.05 | 0.0       | 0.42     |
| 180.17 | 0.0       | 0.26     |
| 188.13 | 0.0       | 0.33     |
| 204.07 | 0.0       | 0.21     |
| 220.08 | 0.3       | 3.12     |
| 227.09 | 0.1       | 0.60     |
| 236.04 | 0.0       | 0.28     |
| 241.08 | 0.5       | 5.15     |
| 242.11 | 0.0       | 0.42     |

|        |      |        |
|--------|------|--------|
| 250.07 | 0.0  | 0.18   |
| 257.05 | 0.0  | 0.35   |
| 259.11 | 1.8  | 17.50  |
| 260.15 | 0.1  | 0.94   |
| 268.11 | 1.2  | 11.66  |
| 269.14 | 0.1  | 0.91   |
| 297.16 | 0.1  | 0.56   |
| 301.17 | 0.1  | 0.76   |
| 315.18 | 0.0  | 0.28   |
| 329.18 | 3.8  | 37.73  |
| 330.16 | 0.4  | 4.46   |
| 331.26 | 0.0  | 0.19   |
| 337.33 | 0.0  | 0.19   |
| 343.76 | 0.0  | 0.24   |
| 353.20 | 0.1  | 0.75   |
| 380.19 | 0.0  | 0.33   |
| 382.21 | 0.0  | 0.41   |
| 384.27 | 0.0  | 0.18   |
| 394.25 | 0.0  | 0.42   |
| 410.20 | 0.0  | 0.38   |
| 411.83 | 0.0  | 0.31   |
| 412.19 | 0.2  | 1.91   |
| 413.14 | 0.0  | 0.25   |
| 415.24 | 0.2  | 1.68   |
| 416.23 | 0.0  | 0.43   |
| 426.19 | 0.0  | 0.20   |
| 440.14 | 0.0  | 0.30   |
| 440.32 | 0.0  | 0.21   |
| 443.87 | 0.1  | 0.97   |
| 444.26 | 10.0 | 100.00 |
| 445.26 | 1.7  | 16.73  |
| 446.25 | 0.2  | 1.93   |
| 454.24 | 0.1  | 0.67   |
| 455.19 | 0.0  | 0.18   |
| 456.24 | 0.5  | 4.76   |
| 457.26 | 0.0  | 0.48   |
| 470.02 | 0.1  | 0.85   |
| 478.37 | 0.1  | 0.57   |
| 486.27 | 1.4  | 13.53  |
| 487.17 | 0.2  | 1.55   |
| 488.35 | 0.1  | 0.50   |

SPECTRUM - MS

10-23-13\_HMG45\_1062\_MS4\_1384\_921\_01.raw

ITMS + p ESI E Full ms4 1062.40@cid35.00 1385.40@cid35.00 922.00@cid35.00 [250.00-1000.00]

Scan #: 1-50

RT: 0.00-4.86

AV: 50

| m/z | Intensity | Relative |
|-----|-----------|----------|
|-----|-----------|----------|

|        |     |      |
|--------|-----|------|
| 268.14 | 0.6 | 0.79 |
|--------|-----|------|

|        |      |        |
|--------|------|--------|
| 426.19 | 0.6  | 0.74   |
| 444.26 | 1.6  | 1.99   |
| 454.24 | 0.4  | 0.51   |
| 458.23 | 81.1 | 100.00 |
| 459.24 | 10.9 | 13.42  |
| 460.24 | 0.8  | 0.99   |
| 472.25 | 0.4  | 0.48   |
| 486.27 | 57.6 | 71.01  |
| 487.27 | 8.6  | 10.56  |
| 488.26 | 0.6  | 0.73   |
| 504.27 | 0.4  | 0.51   |
| 546.28 | 2.3  | 2.83   |
| 547.31 | 0.4  | 0.44   |
| 574.32 | 5.3  | 6.57   |
| 575.33 | 1.0  | 1.25   |
| 620.31 | 2.3  | 2.84   |
| 621.33 | 0.4  | 0.52   |
| 646.34 | 1.3  | 1.59   |
| 676.35 | 11.4 | 14.03  |
| 677.35 | 2.4  | 2.97   |
| 678.33 | 0.4  | 0.50   |
| 692.26 | 0.9  | 1.16   |
| 692.43 | 0.7  | 0.82   |
| 694.35 | 7.0  | 8.66   |
| 695.36 | 1.5  | 1.89   |
| 703.38 | 2.0  | 2.43   |
| 704.45 | 0.4  | 0.46   |
| 764.41 | 17.9 | 22.04  |
| 765.39 | 4.7  | 5.86   |
| 766.40 | 0.5  | 0.65   |
| 815.40 | 2.4  | 2.92   |
| 816.34 | 0.7  | 0.84   |
| 816.51 | 0.4  | 0.55   |
| 817.41 | 0.4  | 0.44   |
| 829.33 | 0.8  | 1.00   |
| 829.53 | 0.7  | 0.82   |
| 847.40 | 3.6  | 4.41   |
| 848.41 | 2.3  | 2.86   |
| 850.42 | 3.2  | 3.94   |
| 851.43 | 1.1  | 1.38   |
| 879.44 | 3.5  | 4.34   |
| 880.47 | 1.1  | 1.35   |
| 889.42 | 7.9  | 9.73   |
| 890.43 | 2.2  | 2.76   |
| 891.44 | 3.9  | 4.79   |
| 892.43 | 1.0  | 1.20   |
| 921.46 | 9.9  | 12.24  |
| 922.48 | 3.7  | 4.53   |
| 923.46 | 0.4  | 0.50   |

SPECTRUM - MS

10-23-13\_HMG45\_1062\_MS5\_1384\_921\_486\_01.raw

ITMS + p ESI E Full ms5 1062.40@cid35.00 1385.40@cid35.00 922.00@cid35.00 487.00@cid35.00

[130.00-500.00]

Scan #: 1-50

RT: 0.00-15.53

AV: 50

| m/z    | Intensity | Relative |
|--------|-----------|----------|
| 178.03 | 0.0       | 0.13     |
| 179.96 | 0.0       | 0.40     |
| 180.10 | 0.0       | 0.25     |
| 181.12 | 0.0       | 0.11     |
| 188.02 | 0.0       | 0.31     |
| 211.13 | 0.0       | 0.13     |
| 213.13 | 0.0       | 0.22     |
| 218.06 | 0.0       | 0.12     |
| 220.05 | 0.1       | 2.11     |
| 227.12 | 0.0       | 0.32     |
| 235.95 | 0.0       | 0.11     |
| 236.06 | 0.0       | 0.16     |
| 241.11 | 0.1       | 3.60     |
| 242.09 | 0.0       | 0.39     |
| 243.13 | 0.0       | 0.12     |
| 250.10 | 0.0       | 0.12     |
| 259.10 | 0.5       | 13.57    |
| 260.12 | 0.0       | 0.76     |
| 268.13 | 0.3       | 7.62     |
| 269.24 | 0.0       | 0.27     |
| 281.96 | 0.0       | 0.24     |
| 293.91 | 0.0       | 0.15     |
| 297.17 | 0.0       | 0.44     |
| 301.09 | 0.0       | 1.00     |
| 329.18 | 1.0       | 25.56    |
| 330.20 | 0.1       | 2.71     |
| 339.23 | 0.0       | 0.15     |
| 353.14 | 0.0       | 0.41     |
| 380.08 | 0.0       | 0.29     |
| 382.24 | 0.0       | 0.23     |
| 394.18 | 0.0       | 0.25     |
| 410.22 | 0.0       | 0.32     |
| 412.26 | 0.1       | 1.45     |
| 413.13 | 0.0       | 0.12     |
| 413.31 | 0.0       | 0.15     |
| 415.23 | 0.1       | 1.54     |
| 415.46 | 0.0       | 0.14     |
| 416.26 | 0.0       | 0.42     |
| 431.23 | 0.0       | 0.31     |
| 440.33 | 0.0       | 0.21     |
| 444.25 | 3.9       | 100.00   |
| 445.26 | 0.5       | 13.01    |
| 446.30 | 0.0       | 0.68     |

|        |     |       |
|--------|-----|-------|
| 454.27 | 0.0 | 0.20  |
| 454.43 | 0.0 | 0.15  |
| 456.31 | 0.1 | 2.02  |
| 457.33 | 0.0 | 0.38  |
| 486.27 | 0.5 | 12.65 |
| 487.26 | 0.1 | 1.89  |
| 488.33 | 0.0 | 0.13  |

SPECTRUM - MS

10-23-13\_HMG45\_1062\_MS5\_1384\_921\_458\_01.raw

ITMS + p ESI E Full ms5 1062.40@cid35.00 1385.40@cid35.00 922.00@cid35.00 459.00@cid35.00  
[125.00-500.00]

Scan #: 1-51

RT: 0.00-13.95

AV: 51

| m/z | Intensity | Relative |
|-----|-----------|----------|
|-----|-----------|----------|

|        |     |        |
|--------|-----|--------|
| 149.05 | 0.0 | 0.51   |
| 157.00 | 0.0 | 0.41   |
| 162.01 | 0.0 | 0.21   |
| 180.06 | 0.0 | 0.96   |
| 181.10 | 0.0 | 0.24   |
| 188.04 | 0.0 | 0.80   |
| 194.04 | 0.1 | 1.56   |
| 203.99 | 0.1 | 1.78   |
| 213.05 | 0.4 | 10.19  |
| 214.07 | 0.0 | 0.80   |
| 217.99 | 0.0 | 0.27   |
| 218.15 | 0.0 | 0.19   |
| 220.07 | 0.2 | 4.99   |
| 222.08 | 0.0 | 0.23   |
| 229.10 | 0.0 | 0.42   |
| 231.05 | 0.5 | 12.25  |
| 232.07 | 0.0 | 0.69   |
| 236.08 | 0.2 | 5.89   |
| 237.08 | 0.0 | 0.26   |
| 238.12 | 0.0 | 0.31   |
| 250.03 | 0.0 | 0.51   |
| 268.12 | 3.8 | 100.00 |
| 269.11 | 0.3 | 6.78   |
| 273.05 | 0.1 | 1.37   |
| 301.13 | 0.9 | 24.72  |
| 302.15 | 0.1 | 1.57   |
| 303.09 | 0.0 | 0.32   |
| 324.11 | 0.0 | 0.58   |
| 352.18 | 0.0 | 0.53   |
| 353.21 | 0.0 | 0.31   |
| 354.27 | 0.0 | 0.38   |
| 366.15 | 0.0 | 0.95   |
| 366.33 | 0.0 | 0.32   |
| 384.15 | 0.1 | 3.60   |



|        |     |       |
|--------|-----|-------|
| 385.05 | 0.0 | 0.65  |
| 385.24 | 0.1 | 1.34  |
| 386.27 | 0.0 | 0.20  |
| 394.17 | 0.0 | 0.21  |
| 398.30 | 0.0 | 0.19  |
| 416.31 | 0.0 | 0.93  |
| 417.24 | 0.0 | 0.20  |
| 426.11 | 0.1 | 3.52  |
| 426.28 | 0.1 | 3.35  |
| 427.21 | 0.1 | 1.40  |
| 428.19 | 0.2 | 4.64  |
| 429.25 | 0.0 | 0.56  |
| 430.19 | 0.0 | 0.20  |
| 458.22 | 3.6 | 93.61 |
| 459.25 | 0.4 | 10.86 |
| 460.28 | 0.0 | 0.65  |

HMG 47 Mass spectral peak lists

SPECTRUM - MS

8-22-13\_HMG47\_1148\_MS2\_01.raw

ITMS + p ESI E Full ms2 1149.00@cid35.00 [315.00-2000.00]

Scan #: 1-20

RT: 0.00-1.57

AV: 20

| m/z     | Intensity | Relative |
|---------|-----------|----------|
| 486.30  | 2668.1    | 12.20    |
| 487.30  | 491.9     | 2.25     |
| 534.36  | 148.7     | 0.68     |
| 646.36  | 823.9     | 3.77     |
| 647.37  | 202.5     | 0.93     |
| 685.42  | 2235.5    | 10.22    |
| 685.93  | 1454.8    | 6.65     |
| 686.43  | 490.8     | 2.24     |
| 706.43  | 348.6     | 1.59     |
| 724.46  | 686.0     | 3.14     |
| 725.44  | 243.4     | 1.11     |
| 813.98  | 762.2     | 3.49     |
| 814.48  | 684.3     | 3.13     |
| 814.98  | 333.7     | 1.53     |
| 917.06  | 21865.3   | 100.00   |
| 917.55  | 18318.6   | 83.78    |
| 918.05  | 8353.6    | 38.20    |
| 918.55  | 1152.7    | 5.27     |
| 1039.57 | 198.5     | 0.91     |
| 1040.09 | 181.2     | 0.83     |
| 1045.60 | 1039.6    | 4.75     |
| 1046.07 | 1018.3    | 4.66     |
| 1046.57 | 585.4     | 2.68     |
| 1054.59 | 307.2     | 1.40     |
| 1055.10 | 308.1     | 1.41     |
| 1055.61 | 159.1     | 0.73     |
| 1079.53 | 157.9     | 0.72     |
| 1109.58 | 523.9     | 2.40     |
| 1110.58 | 245.0     | 1.12     |
| 1132.62 | 149.6     | 0.68     |
| 1133.10 | 161.8     | 0.74     |
| 1133.62 | 141.4     | 0.65     |
| 1148.66 | 4029.8    | 18.43    |
| 1149.15 | 4438.1    | 20.30    |
| 1149.62 | 3032.2    | 13.87    |
| 1150.13 | 656.1     | 3.00     |
| 1187.66 | 1736.8    | 7.94     |
| 1188.67 | 953.1     | 4.36     |
| 1189.68 | 273.2     | 1.25     |
| 1347.73 | 775.3     | 3.55     |
| 1348.73 | 526.1     | 2.41     |

|         |        |      |       |
|---------|--------|------|-------|
| 1349.73 | 162.9  | 0.74 |       |
| 1604.89 | 386.2  | 1.77 |       |
| 1605.89 | 324.9  | 1.49 |       |
| 1606.90 | 264.8  | 1.21 |       |
| 1607.88 | 125.6  | 0.57 |       |
| 1811.06 | 2580.9 |      | 11.80 |
| 1812.07 | 2211.0 |      | 10.11 |
| 1813.08 | 1001.6 |      | 4.58  |
| 1814.07 | 153.1  | 0.70 |       |

SPECTRUM - MS

8-22-13\_HMG47\_1148\_MS3\_1109\_01.raw

ITMS + p ESI E Full ms3 1149.00@cid35.00 1110.00@cid35.00 [305.00-1200.00]

Scan #: 1-20

RT: 0.00-1.41

AV: 20

m/z Intensity Relative

|        |       |        |
|--------|-------|--------|
| 368.31 | 0.4   | 0.22   |
| 385.17 | 5.4   | 2.99   |
| 440.15 | 1.1   | 0.59   |
| 440.37 | 0.6   | 0.35   |
| 442.34 | 0.7   | 0.40   |
| 444.30 | 1.2   | 0.65   |
| 454.25 | 0.7   | 0.40   |
| 458.16 | 0.6   | 0.31   |
| 486.30 | 47.2  | 26.21  |
| 487.32 | 6.4   | 3.57   |
| 572.06 | 0.8   | 0.46   |
| 572.27 | 1.9   | 1.04   |
| 572.46 | 1.7   | 0.93   |
| 573.42 | 1.1   | 0.58   |
| 575.29 | 0.7   | 0.39   |
| 575.45 | 1.0   | 0.55   |
| 576.34 | 0.4   | 0.21   |
| 604.40 | 0.7   | 0.40   |
| 646.36 | 180.3 | 100.00 |
| 647.37 | 33.4  | 18.55  |
| 660.42 | 0.4   | 0.22   |
| 690.20 | 0.7   | 0.38   |
| 690.41 | 1.9   | 1.05   |
| 706.23 | 0.6   | 0.34   |
| 706.40 | 0.6   | 0.36   |
| 708.39 | 12.4  | 6.91   |
| 709.31 | 1.2   | 0.69   |
| 709.47 | 1.0   | 0.54   |
| 778.38 | 1.1   | 0.62   |
| 873.49 | 0.7   | 0.37   |
| 879.50 | 0.4   | 0.21   |
| 903.38 | 1.1   | 0.58   |
| 903.59 | 0.4   | 0.20   |

|         |     |            |
|---------|-----|------------|
| 904.48  | 0.4 | 0.23       |
| 905.44  | 5.7 | 3.14       |
| 906.51  | 1.5 | 0.81       |
| 921.54  | 0.4 | 0.25       |
| 1003.59 |     | 0.6 0.31   |
| 1007.64 |     | 0.4 0.22   |
| 1035.41 |     | 1.0 0.58   |
| 1035.59 |     | 0.6 0.34   |
| 1038.55 |     | 0.6 0.35   |
| 1067.63 |     | 0.9 0.50   |
| 1068.41 |     | 0.5 0.26   |
| 1068.57 |     | 0.4 0.21   |
| 1077.64 |     | 1.7 0.94   |
| 1079.65 |     | 1.3 0.71   |
| 1080.56 |     | 0.4 0.20   |
| 1109.58 |     | 25.2 14.00 |
| 1110.58 |     | 14.0 7.77  |

SPECTRUM - MS

8-22-13\_HMG47\_1148\_MS4\_1109\_486\_02.raw

ITMS + p ESI E Full ms4 1149.00@cid35.00 1110.00@cid35.00 487.00@cid35.00 [130.00-500.00]

Scan #: 1-50

RT: 0.00-8.47

AV: 50

| m/z    | Intensity | Relative |
|--------|-----------|----------|
| 179.97 | 0.0       | 0.47     |
| 180.11 | 0.0       | 0.46     |
| 188.07 | 0.0       | 0.14     |
| 211.12 | 0.0       | 0.45     |
| 213.16 | 0.0       | 0.13     |
| 218.08 | 0.0       | 0.20     |
| 220.09 | 0.3       | 4.49     |
| 221.06 | 0.0       | 0.55     |
| 227.09 | 0.0       | 0.61     |
| 236.11 | 0.0       | 0.40     |
| 241.07 | 0.3       | 4.70     |
| 242.18 | 0.0       | 0.14     |
| 250.11 | 0.0       | 0.54     |
| 257.09 | 0.0       | 0.36     |
| 259.11 | 1.3       | 19.42    |
| 260.07 | 0.1       | 0.92     |
| 260.22 | 0.0       | 0.58     |
| 268.13 | 0.9       | 14.07    |
| 269.09 | 0.1       | 0.96     |
| 282.12 | 0.0       | 0.16     |
| 297.20 | 0.1       | 0.92     |
| 298.21 | 0.0       | 0.18     |
| 301.14 | 0.1       | 1.76     |
| 315.21 | 0.0       | 0.17     |
| 329.18 | 3.0       | 45.36    |

|        |     |        |
|--------|-----|--------|
| 330.17 | 0.4 | 5.62   |
| 353.08 | 0.0 | 0.19   |
| 353.28 | 0.0 | 0.35   |
| 367.24 | 0.0 | 0.20   |
| 380.17 | 0.0 | 0.53   |
| 385.24 | 0.0 | 0.17   |
| 394.18 | 0.0 | 0.42   |
| 399.26 | 0.0 | 0.22   |
| 410.30 | 0.0 | 0.31   |
| 411.93 | 0.0 | 0.14   |
| 412.22 | 0.2 | 2.31   |
| 415.21 | 0.1 | 1.35   |
| 415.37 | 0.0 | 0.59   |
| 416.17 | 0.0 | 0.14   |
| 427.19 | 0.0 | 0.27   |
| 440.07 | 0.0 | 0.15   |
| 443.02 | 0.0 | 0.14   |
| 444.27 | 6.5 | 100.00 |
| 445.27 | 1.0 | 15.19  |
| 454.24 | 0.1 | 0.78   |
| 455.24 | 0.0 | 0.14   |
| 456.25 | 0.4 | 5.80   |
| 457.32 | 0.0 | 0.71   |
| 486.28 | 1.4 | 21.92  |
| 487.31 | 0.2 | 2.78   |

SPECTRUM - MS

8-22-13\_HMG47\_1148\_MS4\_1109\_646\_02.raw

ITMS + p ESI E Full ms4 1149.00@cid35.00 1110.00@cid35.00 647.00@cid35.00 [175.00-700.00]

Scan #: 1-50

RT: 0.00-9.13

AV: 50

m/z Intensity Relative

|        |     |       |
|--------|-----|-------|
| 204.02 | 0.3 | 1.80  |
| 211.06 | 0.2 | 0.99  |
| 218.07 | 0.2 | 1.11  |
| 220.07 | 0.3 | 2.03  |
| 227.07 | 1.9 | 11.92 |
| 228.07 | 0.1 | 0.72  |
| 229.10 | 0.9 | 5.64  |
| 236.07 | 1.4 | 8.65  |
| 237.09 | 0.1 | 0.67  |
| 243.08 | 0.1 | 0.83  |
| 245.09 | 4.8 | 30.29 |
| 246.11 | 0.3 | 2.03  |
| 287.11 | 0.3 | 2.06  |
| 292.08 | 0.1 | 0.93  |
| 311.09 | 0.1 | 0.71  |
| 315.16 | 0.6 | 3.76  |
| 343.17 | 0.7 | 4.26  |

|        |      |        |
|--------|------|--------|
| 353.15 | 0.2  | 1.00   |
| 366.16 | 0.4  | 2.61   |
| 367.19 | 0.4  | 2.39   |
| 368.19 | 0.6  | 3.69   |
| 369.18 | 0.3  | 1.66   |
| 378.18 | 0.6  | 3.64   |
| 380.20 | 0.7  | 4.51   |
| 381.20 | 0.1  | 0.62   |
| 382.22 | 1.4  | 8.83   |
| 383.22 | 0.2  | 1.57   |
| 384.19 | 1.4  | 8.63   |
| 385.17 | 15.8 | 100.00 |
| 386.19 | 1.7  | 11.04  |
| 398.26 | 0.2  | 1.51   |
| 408.18 | 0.2  | 1.00   |
| 424.21 | 1.3  | 8.32   |
| 425.25 | 0.1  | 0.88   |
| 433.25 | 0.2  | 1.11   |
| 440.21 | 3.5  | 22.14  |
| 441.23 | 0.5  | 3.45   |
| 442.25 | 3.4  | 21.34  |
| 443.23 | 0.5  | 2.94   |
| 458.23 | 1.5  | 9.55   |
| 459.25 | 0.3  | 1.77   |
| 572.30 | 13.9 | 87.74  |
| 573.31 | 4.6  | 28.99  |
| 574.43 | 0.1  | 0.85   |
| 575.32 | 4.6  | 29.32  |
| 576.33 | 1.0  | 6.24   |
| 604.34 | 0.9  | 5.93   |
| 605.41 | 0.1  | 0.87   |
| 646.34 | 4.3  | 27.42  |
| 647.36 | 1.0  | 6.22   |

SPECTRUM - MS

8-22-13\_HMG47\_1148\_MS3\_486\_02.raw

ITMS + p ESI E Full ms3 1149.00@cid35.00 487.00@cid35.00 [130.00-500.00]

Scan #: 1-50

RT: 0.00-13.30

AV: 50

m/z Intensity Relative

|        |      |      |
|--------|------|------|
| 178.04 | 0.9  | 0.14 |
| 180.03 | 4.6  | 0.71 |
| 188.04 | 2.6  | 0.41 |
| 194.04 | 0.8  | 0.13 |
| 204.02 | 1.1  | 0.17 |
| 211.07 | 1.8  | 0.28 |
| 213.09 | 1.5  | 0.24 |
| 218.05 | 1.4  | 0.21 |
| 220.08 | 24.5 | 3.84 |

|        |       |        |
|--------|-------|--------|
| 221.08 | 2.3   | 0.36   |
| 227.07 | 3.5   | 0.54   |
| 236.08 | 1.7   | 0.26   |
| 241.10 | 29.3  | 4.58   |
| 242.11 | 2.7   | 0.42   |
| 250.11 | 1.5   | 0.24   |
| 257.10 | 1.7   | 0.27   |
| 259.11 | 121.8 | 19.03  |
| 260.12 | 11.2  | 1.75   |
| 268.13 | 81.2  | 12.69  |
| 269.13 | 8.2   | 1.29   |
| 297.15 | 5.3   | 0.84   |
| 298.14 | 0.7   | 0.11   |
| 301.14 | 8.0   | 1.26   |
| 302.14 | 0.9   | 0.15   |
| 314.17 | 0.7   | 0.12   |
| 315.16 | 1.4   | 0.22   |
| 329.19 | 262.2 | 40.97  |
| 330.20 | 35.3  | 5.52   |
| 352.20 | 0.7   | 0.11   |
| 353.19 | 3.1   | 0.48   |
| 380.20 | 1.5   | 0.23   |
| 382.22 | 1.9   | 0.30   |
| 384.22 | 1.2   | 0.19   |
| 394.23 | 2.7   | 0.42   |
| 410.22 | 2.6   | 0.41   |
| 412.22 | 12.6  | 1.97   |
| 413.23 | 2.6   | 0.40   |
| 415.25 | 10.6  | 1.66   |
| 416.26 | 2.0   | 0.31   |
| 426.25 | 1.7   | 0.27   |
| 431.22 | 1.5   | 0.23   |
| 440.23 | 1.2   | 0.19   |
| 444.27 | 640.1 | 100.00 |
| 445.27 | 129.0 | 20.16  |
| 454.25 | 7.0   | 1.10   |
| 455.26 | 1.5   | 0.24   |
| 456.27 | 38.6  | 6.03   |
| 457.28 | 8.3   | 1.29   |
| 486.28 | 105.5 | 16.48  |
| 487.29 | 22.2  | 3.47   |

HMG 49 Mass spectral peak lists

SPECTRUM - MS

4-26-13\_HMO-49\_1148\_MS2\_01.raw

ITMS + p ESI E Full ms2 1149.40@cid35.00 [315.00-2000.00]

Scan #: 1-20

RT: 0.00-1.74

AV: 20

| m/z     | Intensity | Relative |
|---------|-----------|----------|
| 486.08  | 15870.9   | 12.61    |
| 487.09  | 3241.3    | 2.57     |
| 646.13  | 1389.2    | 1.10     |
| 685.17  | 15342.0   | 12.19    |
| 685.68  | 11013.6   | 8.75     |
| 686.17  | 4660.2    | 3.70     |
| 686.70  | 1215.9    | 0.97     |
| 706.15  | 1402.6    | 1.11     |
| 724.17  | 2917.7    | 2.32     |
| 761.65  | 1282.3    | 1.02     |
| 798.68  | 6167.4    | 4.90     |
| 799.16  | 5069.1    | 4.03     |
| 799.64  | 2696.5    | 2.14     |
| 813.65  | 1654.5    | 1.31     |
| 814.15  | 1527.9    | 1.21     |
| 916.69  | 125901.3  | 100.00   |
| 917.16  | 113571.0  | 90.21    |
| 917.67  | 57558.1   | 45.72    |
| 918.19  | 18512.8   | 14.70    |
| 993.17  | 2866.6    | 2.28     |
| 993.67  | 3279.2    | 2.60     |
| 994.17  | 1954.0    | 1.55     |
| 1030.19 | 33644.4   | 26.72    |
| 1030.68 | 33787.5   | 26.84    |
| 1031.18 | 19999.7   | 15.89    |
| 1031.70 | 7734.8    | 6.14     |
| 1045.18 | 4526.6    | 3.60     |
| 1045.68 | 4368.6    | 3.47     |
| 1046.18 | 2885.9    | 2.29     |
| 1046.69 | 1215.2    | 0.97     |
| 1054.17 | 1967.2    | 1.56     |
| 1054.66 | 2011.5    | 1.60     |
| 1109.14 | 2528.7    | 2.01     |
| 1110.15 | 1368.9    | 1.09     |
| 1148.24 | 19809.7   | 15.73    |
| 1148.71 | 22164.2   | 17.60    |
| 1149.18 | 14879.7   | 11.82    |
| 1149.68 | 7898.4    | 6.27     |
| 1187.19 | 3470.7    | 2.76     |
| 1188.19 | 2235.8    | 1.78     |
| 1347.24 | 12815.3   | 10.18    |



|         |         |       |
|---------|---------|-------|
| 1348.24 | 8906.8  | 7.07  |
| 1349.22 | 3468.9  | 2.76  |
| 1574.27 | 4090.5  | 3.25  |
| 1575.26 | 3419.6  | 2.72  |
| 1576.28 | 1602.7  | 1.27  |
| 1810.32 | 26018.9 | 20.67 |
| 1811.33 | 22990.9 | 18.26 |
| 1812.33 | 11291.3 | 8.97  |
| 1813.32 | 3410.6  | 2.71  |

SPECTRUM - MS

4-26-13\_HMO-49\_1148\_MS3\_1109\_01.raw

ITMS + p ESI E Full ms3 1149.40@cid35.00 1110.00@cid35.00 [305.00-1200.00]

Scan #: 1-50

RT: 0.00-6.52

AV: 50

m/z Intensity Relative

|        |       |        |
|--------|-------|--------|
| 384.05 | 1.1   | 0.37   |
| 385.05 | 9.8   | 3.26   |
| 386.08 | 1.3   | 0.42   |
| 398.12 | 1.4   | 0.48   |
| 412.07 | 2.0   | 0.68   |
| 440.01 | 2.4   | 0.81   |
| 442.06 | 2.1   | 0.71   |
| 454.03 | 1.0   | 0.32   |
| 458.09 | 2.3   | 0.75   |
| 470.07 | 1.0   | 0.32   |
| 472.03 | 2.4   | 0.81   |
| 486.07 | 51.5  | 17.12  |
| 487.08 | 7.8   | 2.59   |
| 572.09 | 7.0   | 2.34   |
| 573.10 | 2.6   | 0.86   |
| 575.12 | 4.1   | 1.35   |
| 598.06 | 5.4   | 1.80   |
| 599.08 | 1.4   | 0.47   |
| 646.11 | 301.1 | 100.00 |
| 647.12 | 76.8  | 25.52  |
| 660.09 | 1.0   | 0.34   |
| 690.06 | 2.9   | 0.95   |
| 691.09 | 0.8   | 0.27   |
| 708.08 | 23.7  | 7.88   |
| 709.10 | 6.2   | 2.07   |
| 778.12 | 2.1   | 0.70   |
| 779.13 | 1.0   | 0.32   |
| 799.10 | 26.7  | 8.87   |
| 800.11 | 9.9   | 3.28   |
| 873.14 | 197.2 | 65.50  |
| 874.15 | 74.7  | 24.82  |
| 875.22 | 1.0   | 0.35   |
| 879.14 | 0.9   | 0.31   |

|         |      |           |
|---------|------|-----------|
| 891.11  | 2.1  | 0.71      |
| 903.04  | 2.7  | 0.91      |
| 904.11  | 1.4  | 0.45      |
| 905.09  | 11.3 | 3.77      |
| 906.11  | 4.3  | 1.42      |
| 916.65  | 1.2  | 0.40      |
| 917.16  | 1.1  | 0.38      |
| 921.18  | 2.1  | 0.70      |
| 922.19  | 1.1  | 0.36      |
| 1015.17 |      | 8.7 2.88  |
| 1015.67 |      | 4.8 1.60  |
| 1035.14 |      | 2.8 0.95  |
| 1036.02 |      | 0.8 0.28  |
| 1067.17 |      | 3.5 1.17  |
| 1068.18 |      | 2.3 0.75  |
| 1109.15 |      | 24.6 8.18 |
| 1110.14 |      | 16.0 5.32 |

SPECTRUM - MS

4-26-13\_HMO-49\_1148\_MS4\_1109\_486\_01.raw

ITMS + p ESI E Full ms4 1149.40@cid35.00 1110.00@cid35.00 487.00@cid35.00 [130.00-500.00]

Scan #: 1-100

RT: 0.00-12.02

AV: 100

| m/z    | Intensity | Relative |
|--------|-----------|----------|
| 177.92 | 0.0       | 1.33     |
| 179.97 | 0.0       | 0.62     |
| 196.06 | 0.0       | 0.43     |
| 208.09 | 0.1       | 2.20     |
| 208.92 | 0.0       | 0.68     |
| 210.93 | 0.0       | 0.44     |
| 220.06 | 0.0       | 1.23     |
| 241.01 | 0.2       | 5.80     |
| 242.01 | 0.0       | 0.55     |
| 250.04 | 0.2       | 5.93     |
| 250.93 | 0.0       | 0.87     |
| 252.01 | 0.3       | 10.39    |
| 257.01 | 0.0       | 0.57     |
| 259.01 | 3.1       | 97.77    |
| 259.77 | 0.0       | 0.60     |
| 260.00 | 0.1       | 4.24     |
| 263.84 | 0.0       | 0.39     |
| 267.99 | 0.2       | 7.24     |
| 268.17 | 0.1       | 1.58     |
| 297.05 | 0.0       | 0.40     |
| 300.98 | 0.1       | 2.19     |
| 320.99 | 0.0       | 0.46     |
| 329.05 | 0.4       | 11.89    |
| 330.04 | 0.1       | 1.74     |
| 351.95 | 0.0       | 0.39     |

|        |     |        |
|--------|-----|--------|
| 352.85 | 0.0 | 1.27   |
| 356.99 | 0.0 | 0.62   |
| 379.83 | 0.0 | 0.63   |
| 380.05 | 0.0 | 0.66   |
| 380.95 | 0.0 | 1.26   |
| 381.18 | 0.0 | 0.75   |
| 382.07 | 0.0 | 1.04   |
| 382.24 | 0.0 | 0.45   |
| 384.02 | 0.0 | 0.83   |
| 385.11 | 0.0 | 0.45   |
| 393.93 | 0.0 | 1.44   |
| 412.08 | 3.2 | 100.00 |
| 413.07 | 0.5 | 15.68  |
| 414.99 | 0.0 | 0.55   |
| 424.13 | 0.0 | 0.47   |
| 444.09 | 2.1 | 64.52  |
| 445.12 | 0.4 | 11.34  |
| 454.00 | 0.0 | 0.51   |
| 455.16 | 0.0 | 0.81   |
| 456.02 | 0.0 | 1.02   |
| 456.16 | 0.0 | 0.94   |
| 486.12 | 0.4 | 11.74  |
| 486.92 | 0.0 | 1.13   |
| 487.08 | 0.0 | 0.92   |
| 487.23 | 0.0 | 0.86   |

SPECTRUM - MS

4-26-13\_HMO-49\_1148\_MS4\_1109\_646\_02.raw

ITMS + p ESI E Full ms4 1149.40@cid35.00 1110.00@cid35.00 647.00@cid35.00 [175.00-700.00]

Scan #: 1-100

RT: 0.00-14.42

AV: 100

m/z Intensity Relative

|        |     |       |
|--------|-----|-------|
| 193.94 | 0.1 | 1.10  |
| 203.94 | 0.2 | 1.60  |
| 217.98 | 0.1 | 1.01  |
| 219.99 | 0.2 | 1.67  |
| 226.98 | 1.4 | 12.32 |
| 229.00 | 0.7 | 6.20  |
| 235.97 | 1.0 | 8.87  |
| 244.99 | 3.2 | 28.17 |
| 246.04 | 0.2 | 1.98  |
| 287.00 | 0.2 | 2.01  |
| 291.98 | 0.1 | 0.72  |
| 315.02 | 0.4 | 3.81  |
| 343.04 | 0.6 | 4.97  |
| 366.01 | 0.3 | 2.66  |
| 366.97 | 0.1 | 1.22  |
| 367.14 | 0.2 | 1.65  |
| 368.01 | 0.3 | 2.47  |

|        |      |        |
|--------|------|--------|
| 369.13 | 0.1  | 0.81   |
| 371.08 | 0.1  | 0.92   |
| 378.05 | 0.5  | 4.39   |
| 380.07 | 0.4  | 3.94   |
| 382.06 | 0.8  | 7.03   |
| 383.09 | 0.1  | 1.13   |
| 384.05 | 0.9  | 7.92   |
| 385.05 | 11.4 | 100.00 |
| 386.05 | 1.5  | 13.44  |
| 398.06 | 0.4  | 3.28   |
| 408.03 | 0.2  | 1.76   |
| 424.05 | 0.7  | 5.96   |
| 425.06 | 0.1  | 1.00   |
| 433.05 | 0.2  | 1.54   |
| 440.04 | 2.6  | 22.93  |
| 441.08 | 0.2  | 2.10   |
| 442.05 | 2.2  | 18.98  |
| 443.16 | 0.2  | 1.33   |
| 458.09 | 1.1  | 9.22   |
| 459.08 | 0.1  | 1.00   |
| 530.06 | 0.1  | 0.71   |
| 572.08 | 9.1  | 79.55  |
| 573.10 | 3.1  | 27.12  |
| 574.10 | 0.3  | 2.79   |
| 575.10 | 3.5  | 30.84  |
| 576.05 | 0.5  | 4.31   |
| 576.22 | 0.3  | 2.38   |
| 604.04 | 0.4  | 3.11   |
| 604.20 | 0.3  | 3.01   |
| 605.10 | 0.1  | 1.31   |
| 605.26 | 0.1  | 0.71   |
| 646.13 | 1.9  | 16.79  |
| 647.16 | 0.3  | 2.38   |

SPECTRUM - MS

4-26-13\_HMO-49\_1148\_MS3\_486\_01.raw

ITMS + p ESI E Full ms3 1149.40@cid35.00 487.00@cid35.00 [130.00-500.00]

Scan #: 1-50

RT: 0.00-2.23

AV: 50

m/z Intensity Relative

|        |      |      |
|--------|------|------|
| 177.93 | 14.5 | 1.08 |
| 207.99 | 73.5 | 5.47 |
| 208.92 | 4.5  | 0.33 |
| 209.07 | 4.7  | 0.35 |
| 217.90 | 8.3  | 0.62 |
| 218.07 | 5.7  | 0.42 |
| 220.02 | 6.6  | 0.49 |
| 241.00 | 66.5 | 4.95 |
| 242.06 | 5.2  | 0.39 |

|        |        |       |        |
|--------|--------|-------|--------|
| 249.96 | 102.5  | 7.63  |        |
| 250.99 | 12.3   | 0.92  |        |
| 252.00 | 171.8  | 12.79 |        |
| 253.00 | 17.8   | 1.33  |        |
| 256.95 | 18.0   | 1.34  |        |
| 259.00 | 1338.4 |       | 99.65  |
| 260.01 | 108.9  | 8.11  |        |
| 268.01 | 40.4   | 3.00  |        |
| 300.84 | 3.5    | 0.26  |        |
| 301.06 | 7.1    | 0.53  |        |
| 312.05 | 3.7    | 0.27  |        |
| 314.08 | 3.5    | 0.26  |        |
| 329.04 | 74.8   | 5.57  |        |
| 330.05 | 12.5   | 0.93  |        |
| 338.03 | 4.0    | 0.30  |        |
| 338.95 | 3.7    | 0.28  |        |
| 341.02 | 7.9    | 0.59  |        |
| 356.06 | 6.2    | 0.46  |        |
| 370.14 | 5.0    | 0.37  |        |
| 380.07 | 3.7    | 0.27  |        |
| 382.06 | 14.6   | 1.09  |        |
| 384.01 | 37.9   | 2.82  |        |
| 384.97 | 3.4    | 0.25  |        |
| 385.17 | 3.8    | 0.29  |        |
| 394.02 | 4.0    | 0.29  |        |
| 410.03 | 11.5   | 0.86  |        |
| 411.06 | 3.5    | 0.26  |        |
| 412.07 | 1343.2 |       | 100.00 |
| 413.04 | 252.5  | 18.80 |        |
| 414.99 | 17.9   | 1.33  |        |
| 415.14 | 11.0   | 0.82  |        |
| 416.07 | 4.1    | 0.31  |        |
| 426.12 | 4.3    | 0.32  |        |
| 440.06 | 4.6    | 0.34  |        |
| 444.10 | 739.6  | 55.07 |        |
| 445.09 | 129.6  | 9.65  |        |
| 454.08 | 8.9    | 0.67  |        |
| 456.13 | 38.9   | 2.90  |        |
| 457.16 | 7.5    | 0.56  |        |
| 486.07 | 334.2  | 24.88 |        |
| 487.09 | 60.6   | 4.51  |        |

HMG 51 Mass spectral peak lists

SPECTRUM - MS

12-17-13\_HMG51\_1149\_MS2\_01.raw

ITMS + p ESI E Full ms2 1149.00@cid35.00 [315.00-2000.00]

Scan #: 1-20

RT: 0.00-2.05

AV: 20

| m/z     | Intensity | Relative |
|---------|-----------|----------|
| 433.24  | 88.2      | 7.34     |
| 486.29  | 92.6      | 7.71     |
| 534.35  | 72.9      | 6.07     |
| 660.34  | 434.3     | 36.14    |
| 661.35  | 115.8     | 9.64     |
| 738.43  | 549.5     | 45.73    |
| 739.44  | 189.8     | 15.80    |
| 778.42  | 65.1      | 5.42     |
| 780.42  | 94.5      | 7.87     |
| 829.97  | 265.9     | 22.13    |
| 830.47  | 215.6     | 17.94    |
| 830.97  | 95.2      | 7.92     |
| 916.99  | 538.5     | 44.81    |
| 917.49  | 468.6     | 39.00    |
| 917.99  | 219.7     | 18.28    |
| 918.49  | 65.4      | 5.45     |
| 952.20  | 62.7      | 5.22     |
| 954.20  | 310.5     | 25.84    |
| 993.50  | 331.4     | 27.58    |
| 994.01  | 305.2     | 25.40    |
| 994.51  | 159.5     | 13.27    |
| 1012.13 | 460.9     | 38.35    |
| 1030.53 | 1201.8    | 100.00   |
| 1031.02 | 1083.3    | 90.15    |
| 1031.52 | 595.3     | 49.53    |
| 1032.11 | 343.0     | 28.54    |
| 1045.49 | 64.2      | 5.34     |
| 1046.01 | 61.8      | 5.14     |
| 1079.19 | 118.0     | 9.82     |
| 1080.19 | 61.4      | 5.11     |
| 1089.21 | 59.4      | 4.94     |
| 1090.18 | 89.7      | 7.47     |
| 1118.19 | 53.4      | 4.45     |
| 1148.08 | 181.8     | 15.13    |
| 1148.60 | 491.5     | 40.90    |
| 1149.08 | 581.0     | 48.35    |
| 1149.55 | 376.1     | 31.29    |
| 1150.06 | 185.1     | 15.40    |
| 1173.59 | 88.0      | 7.33     |
| 1174.58 | 50.5      | 4.20     |
| 1187.59 | 68.7      | 5.72     |

|         |       |       |
|---------|-------|-------|
| 1558.72 | 264.9 | 22.04 |
| 1559.72 | 182.7 | 15.20 |
| 1560.70 | 71.0  | 5.91  |
| 1636.77 | 628.6 | 52.30 |
| 1637.78 | 468.5 | 38.99 |
| 1638.79 | 193.7 | 16.12 |
| 1639.80 | 53.1  | 4.42  |
| 1863.89 | 113.7 | 9.46  |
| 1864.91 | 97.9  | 8.14  |

SPECTRUM - MS

12-18-13\_HMG51\_1149\_MS3\_917\_01.raw

ITMS + p ESI E Full ms3 1149.00@cid35.00 917.40@cid35.00 [250.00-2000.00]

Scan #: 1-20

RT: 0.00-1.93

AV: 20

m/z Intensity Relative

|        |       |       |
|--------|-------|-------|
| 385.18 | 4.0   | 2.36  |
| 433.24 | 24.6  | 14.62 |
| 440.18 | 4.2   | 2.47  |
| 458.26 | 4.1   | 2.44  |
| 472.28 | 8.1   | 4.79  |
| 534.36 | 11.5  | 6.82  |
| 586.32 | 5.6   | 3.35  |
| 605.33 | 9.3   | 5.53  |
| 605.85 | 6.1   | 3.63  |
| 646.33 | 96.4  | 57.27 |
| 647.33 | 23.2  | 13.78 |
| 660.33 | 73.9  | 43.88 |
| 661.36 | 18.4  | 10.93 |
| 711.90 | 12.6  | 7.51  |
| 712.40 | 7.3   | 4.32  |
| 724.40 | 15.0  | 8.92  |
| 725.45 | 4.3   | 2.55  |
| 738.43 | 129.2 | 76.76 |
| 739.44 | 38.9  | 23.09 |
| 740.45 | 7.9   | 4.71  |
| 761.88 | 4.5   | 2.65  |
| 776.88 | 6.8   | 4.06  |
| 777.41 | 6.5   | 3.88  |
| 798.92 | 15.1  | 8.98  |
| 799.45 | 9.6   | 5.68  |
| 799.92 | 3.8   | 2.23  |
| 813.93 | 124.2 | 73.76 |
| 814.42 | 96.2  | 57.14 |
| 814.93 | 38.2  | 22.69 |
| 815.43 | 11.4  | 6.77  |
| 822.95 | 4.2   | 2.52  |
| 867.47 | 5.0   | 2.98  |
| 917.01 | 51.3  | 30.47 |

|         |      |       |        |
|---------|------|-------|--------|
| 917.50  | 42.5 | 25.25 |        |
| 917.99  | 21.4 | 12.71 |        |
| 918.50  | 5.4  | 3.21  |        |
| 1065.48 |      | 5.1   | 3.05   |
| 1079.41 |      | 6.1   | 3.61   |
| 1095.52 |      | 51.8  | 30.77  |
| 1096.51 |      | 22.3  | 13.28  |
| 1097.53 |      | 6.1   | 3.61   |
| 1109.53 |      | 6.7   | 4.01   |
| 1173.61 |      | 104.5 | 62.07  |
| 1174.62 |      | 49.8  | 29.61  |
| 1175.59 |      | 14.3  | 8.48   |
| 1187.61 |      | 168.3 | 100.00 |
| 1188.61 |      | 88.2  | 52.40  |
| 1189.56 |      | 17.8  | 10.56  |
| 1400.84 |      | 12.7  | 7.56   |
| 1401.69 |      | 15.2  | 9.05   |

SPECTRUM - MS

12-18-13\_HMG51\_1149\_MS4\_917\_1173\_01.raw

ITMS + p ESI E Full ms4 1149.00@cid35.00 917.40@cid35.00 1174.00@cid35.00 [320.00-1200.00]

Scan #: 1-20

RT: 0.00-2.74

AV: 20

| m/z    | Intensity | Relative |
|--------|-----------|----------|
| 435.24 | 0.6       | 1.74     |
| 458.29 | 0.1       | 0.38     |
| 470.22 | 0.2       | 0.46     |
| 472.22 | 0.5       | 1.37     |
| 472.41 | 0.2       | 0.52     |
| 474.36 | 0.2       | 0.58     |
| 486.33 | 0.7       | 1.94     |
| 487.32 | 0.1       | 0.27     |
| 502.24 | 0.2       | 0.60     |
| 502.39 | 0.2       | 0.53     |
| 516.38 | 0.1       | 0.35     |
| 534.34 | 13.6      | 38.02    |
| 535.34 | 3.2       | 8.83     |
| 536.32 | 0.4       | 0.99     |
| 590.34 | 0.3       | 0.74     |
| 625.36 | 0.3       | 0.82     |
| 626.35 | 0.1       | 0.28     |
| 639.40 | 0.3       | 0.82     |
| 662.12 | 0.1       | 0.28     |
| 662.37 | 0.3       | 0.72     |
| 690.40 | 0.1       | 0.29     |
| 692.37 | 0.1       | 0.25     |
| 692.51 | 0.1       | 0.28     |
| 706.46 | 0.1       | 0.32     |
| 724.41 | 35.7      | 100.00   |



|         |      |       |       |
|---------|------|-------|-------|
| 725.41  | 9.6  | 27.02 |       |
| 726.43  | 1.2  | 3.31  |       |
| 738.44  | 23.5 | 65.89 |       |
| 739.45  | 6.2  | 17.47 |       |
| 740.48  | 0.6  | 1.82  |       |
| 969.55  | 0.8  | 2.33  |       |
| 970.56  | 0.2  | 0.66  |       |
| 970.70  | 0.2  | 0.46  |       |
| 983.43  | 0.7  | 1.90  |       |
| 983.62  | 0.8  | 2.31  |       |
| 984.55  | 0.4  | 1.23  |       |
| 1067.56 |      | 0.3   | 0.76  |
| 1068.45 |      | 0.1   | 0.39  |
| 1074.25 |      | 0.1   | 0.24  |
| 1074.54 |      | 0.5   | 1.43  |
| 1075.51 |      | 0.1   | 0.32  |
| 1075.69 |      | 0.1   | 0.24  |
| 1141.52 |      | 1.0   | 2.83  |
| 1142.53 |      | 0.3   | 0.83  |
| 1143.48 |      | 0.2   | 0.58  |
| 1143.67 |      | 0.1   | 0.33  |
| 1173.62 |      | 5.7   | 15.83 |
| 1174.64 |      | 2.6   | 7.22  |
| 1175.54 |      | 0.6   | 1.61  |
| 1175.70 |      | 0.4   | 0.99  |

SPECTRUM - MS

12-18-13\_HMG51\_1149\_MS4\_917\_1187\_01.raw

ITMS + p ESI E Full ms4 1149.00@cid35.00 917.40@cid35.00 1188.00@cid35.00 [325.00-1200.00]

Scan #: 1-21

RT: 0.00-2.77

AV: 21

m/z Intensity Relative

|        |      |       |
|--------|------|-------|
| 435.24 | 0.7  | 0.68  |
| 456.37 | 0.2  | 0.18  |
| 457.32 | 0.1  | 0.09  |
| 470.29 | 0.1  | 0.10  |
| 472.30 | 0.7  | 0.68  |
| 473.26 | 0.1  | 0.13  |
| 474.34 | 0.1  | 0.14  |
| 486.33 | 0.8  | 0.80  |
| 487.30 | 0.1  | 0.10  |
| 492.43 | 0.1  | 0.09  |
| 502.27 | 0.2  | 0.20  |
| 516.25 | 0.2  | 0.23  |
| 516.44 | 0.1  | 0.12  |
| 517.34 | 0.1  | 0.09  |
| 534.35 | 14.8 | 14.89 |
| 535.35 | 3.0  | 3.01  |
| 536.31 | 0.3  | 0.30  |

|         |      |        |       |
|---------|------|--------|-------|
| 562.29  | 0.1  | 0.15   |       |
| 590.39  | 0.2  | 0.21   |       |
| 620.41  | 0.1  | 0.07   |       |
| 621.44  | 0.1  | 0.08   |       |
| 639.26  | 1.1  | 1.12   |       |
| 639.44  | 0.9  | 0.87   |       |
| 640.38  | 0.4  | 0.44   |       |
| 665.39  | 0.1  | 0.09   |       |
| 676.45  | 0.1  | 0.07   |       |
| 688.35  | 0.1  | 0.07   |       |
| 690.32  | 0.1  | 0.09   |       |
| 690.50  | 0.1  | 0.08   |       |
| 706.37  | 0.5  | 0.52   |       |
| 707.56  | 0.1  | 0.08   |       |
| 720.36  | 0.1  | 0.07   |       |
| 738.43  | 99.1 | 100.00 |       |
| 739.43  | 27.6 | 27.85  |       |
| 740.44  | 3.2  | 3.28   |       |
| 896.50  | 0.1  | 0.08   |       |
| 965.49  | 0.3  | 0.26   |       |
| 983.51  | 1.4  | 1.37   |       |
| 984.55  | 0.4  | 0.40   |       |
| 1081.61 |      | 0.1    | 0.10  |
| 1082.41 |      | 0.1    | 0.08  |
| 1088.54 |      | 0.6    | 0.60  |
| 1089.49 |      | 0.3    | 0.29  |
| 1089.73 |      | 0.1    | 0.08  |
| 1155.61 |      | 0.6    | 0.57  |
| 1156.53 |      | 0.4    | 0.37  |
| 1157.64 |      | 0.1    | 0.09  |
| 1187.61 |      | 16.1   | 16.29 |
| 1188.60 |      | 9.1    | 9.23  |
| 1189.60 |      | 2.6    | 2.63  |

SPECTRUM - MS

12-17-13\_HMG51\_1149\_MS3\_1558\_01.raw

ITMS + p ESI E Full ms3 1149.00@cid35.00 1559.40@cid35.00 [425.00-1600.00]

Scan #: 1-20

RT: 0.00-1.89

AV: 20

m/z Intensity Relative

|        |     |      |
|--------|-----|------|
| 458.17 | 0.7 | 1.73 |
| 458.33 | 0.8 | 2.05 |
| 472.34 | 0.3 | 0.71 |
| 486.27 | 1.9 | 4.87 |
| 574.38 | 0.2 | 0.61 |
| 620.29 | 0.3 | 0.85 |
| 646.29 | 1.8 | 4.78 |
| 660.43 | 1.9 | 5.02 |
| 661.39 | 0.7 | 1.96 |

|         |      |             |
|---------|------|-------------|
| 676.37  | 0.5  | 1.20        |
| 694.31  | 0.3  | 0.77        |
| 764.27  | 0.4  | 1.11        |
| 764.43  | 0.4  | 0.99        |
| 785.35  | 0.2  | 0.65        |
| 859.38  | 1.0  | 2.54        |
| 873.46  | 1.0  | 2.53        |
| 874.39  | 0.3  | 0.77        |
| 889.42  | 0.4  | 1.16        |
| 920.97  | 0.2  | 0.64        |
| 921.44  | 24.9 | 65.22       |
| 922.44  | 7.1  | 18.57       |
| 923.43  | 1.0  | 2.74        |
| 1095.49 |      | 8.8 22.94   |
| 1096.51 |      | 2.9 7.70    |
| 1097.53 |      | 0.4 1.03    |
| 1109.50 |      | 3.0 7.73    |
| 1110.50 |      | 0.7 1.91    |
| 1110.67 |      | 0.4 1.14    |
| 1116.59 |      | 0.2 0.59    |
| 1165.56 |      | 0.6 1.54    |
| 1248.66 |      | 4.5 11.89   |
| 1249.58 |      | 3.8 9.96    |
| 1250.67 |      | 0.4 0.93    |
| 1322.60 |      | 38.2 100.00 |
| 1323.61 |      | 18.7 48.86  |
| 1324.73 |      | 3.1 8.03    |
| 1331.62 |      | 0.7 1.72    |
| 1332.57 |      | 0.3 0.81    |
| 1340.52 |      | 0.6 1.47    |
| 1352.67 |      | 2.1 5.62    |
| 1353.63 |      | 1.1 2.98    |
| 1354.69 |      | 0.3 0.67    |
| 1401.59 |      | 2.4 6.35    |
| 1401.79 |      | 1.4 3.65    |
| 1402.66 |      | 1.6 4.26    |
| 1403.67 |      | 0.5 1.21    |
| 1528.77 |      | 0.7 1.77    |
| 1558.72 |      | 14.4 37.76  |
| 1559.73 |      | 9.5 24.86   |
| 1560.72 |      | 3.4 8.83    |

SPECTRUM - MS

12-17-13\_HMG51\_1149\_MS4\_1558\_660\_01.raw

ITMS + p ESI E Full ms4 1149.00@cid35.00 1559.40@cid35.00 661.00@cid35.00 [180.00-700.00]

Scan #: 1-50

RT: 0.00-21.03

AV: 50

| m/z | Intensity | Relative |
|-----|-----------|----------|
|-----|-----------|----------|

|        |     |      |
|--------|-----|------|
| 229.07 | 0.0 | 7.98 |
|--------|-----|------|

|        |     |        |
|--------|-----|--------|
| 236.06 | 0.0 | 2.93   |
| 241.06 | 0.0 | 1.58   |
| 259.12 | 0.2 | 79.02  |
| 260.05 | 0.0 | 6.64   |
| 260.22 | 0.0 | 2.62   |
| 302.12 | 0.0 | 1.82   |
| 325.14 | 0.0 | 1.60   |
| 364.16 | 0.0 | 2.79   |
| 367.98 | 0.0 | 1.70   |
| 382.19 | 0.0 | 2.51   |
| 384.19 | 0.0 | 1.82   |
| 398.23 | 0.0 | 2.62   |
| 400.28 | 0.0 | 2.14   |
| 412.43 | 0.0 | 1.70   |
| 413.16 | 0.0 | 2.08   |
| 424.18 | 0.0 | 5.39   |
| 424.33 | 0.0 | 2.41   |
| 425.25 | 0.0 | 1.92   |
| 426.20 | 0.0 | 9.95   |
| 442.22 | 0.0 | 20.62  |
| 443.32 | 0.0 | 1.73   |
| 454.27 | 0.0 | 5.52   |
| 456.23 | 0.0 | 1.73   |
| 457.28 | 0.0 | 1.63   |
| 472.31 | 0.0 | 17.42  |
| 473.23 | 0.0 | 1.57   |
| 473.42 | 0.0 | 4.06   |
| 486.33 | 0.0 | 2.56   |
| 515.35 | 0.0 | 2.19   |
| 516.35 | 0.0 | 1.63   |
| 523.86 | 0.0 | 21.55  |
| 554.20 | 0.0 | 1.64   |
| 556.24 | 0.0 | 1.79   |
| 586.28 | 0.2 | 100.00 |
| 587.29 | 0.0 | 19.18  |
| 588.25 | 0.0 | 2.14   |
| 588.99 | 0.0 | 1.54   |
| 589.33 | 0.0 | 18.07  |
| 590.35 | 0.0 | 5.64   |
| 614.22 | 0.0 | 3.38   |
| 614.37 | 0.0 | 5.31   |
| 615.25 | 0.0 | 1.71   |
| 616.42 | 0.0 | 2.99   |
| 618.31 | 0.1 | 35.52  |
| 619.37 | 0.0 | 12.31  |
| 660.09 | 0.0 | 13.27  |
| 660.22 | 0.0 | 8.26   |
| 660.42 | 0.2 | 77.16  |
| 661.24 | 0.0 | 13.68  |

SPECTRUM - MS

12-18-13\_HMG51\_1149\_MS4\_1558\_1109\_01.raw

ITMS + p ESI E Full ms4 1149.00@cid35.00 1559.40@cid35.00 1110.00@cid35.00 [305.00-1200.00]

Scan #: 1-51

RT: 0.00-30.52

AV: 51

| m/z    | Intensity | Relative |
|--------|-----------|----------|
| 385.17 | 0.0       | 5.22     |
| 398.23 | 0.0       | 1.09     |
| 412.24 | 0.0       | 1.08     |
| 440.06 | 0.0       | 0.47     |
| 440.18 | 0.0       | 0.43     |
| 442.20 | 0.0       | 0.78     |
| 454.17 | 0.0       | 0.36     |
| 458.27 | 0.0       | 0.40     |
| 458.37 | 0.0       | 0.36     |
| 472.23 | 0.0       | 0.71     |
| 486.26 | 0.1       | 15.12    |
| 487.24 | 0.0       | 1.63     |
| 572.24 | 0.0       | 1.11     |
| 572.42 | 0.0       | 0.41     |
| 573.10 | 0.0       | 0.35     |
| 573.40 | 0.0       | 0.46     |
| 575.34 | 0.0       | 1.30     |
| 598.23 | 0.0       | 1.25     |
| 598.49 | 0.0       | 0.41     |
| 611.33 | 0.0       | 0.37     |
| 646.31 | 0.7       | 100.00   |
| 647.32 | 0.1       | 17.13    |
| 648.24 | 0.0       | 1.36     |
| 648.37 | 0.0       | 0.75     |
| 660.41 | 0.0       | 0.41     |
| 690.31 | 0.0       | 1.00     |
| 690.52 | 0.0       | 0.38     |
| 706.25 | 0.0       | 0.49     |
| 706.39 | 0.0       | 0.44     |
| 708.42 | 0.0       | 4.82     |
| 709.33 | 0.0       | 0.79     |
| 709.52 | 0.0       | 0.48     |
| 778.42 | 0.0       | 0.41     |
| 799.37 | 0.1       | 10.93    |
| 800.41 | 0.0       | 1.56     |
| 831.40 | 0.0       | 0.38     |
| 873.41 | 0.6       | 81.53    |
| 874.40 | 0.1       | 18.96    |
| 875.46 | 0.0       | 2.25     |
| 891.46 | 0.0       | 0.49     |
| 903.48 | 0.0       | 0.86     |
| 905.41 | 0.0       | 2.79     |
| 906.51 | 0.0       | 0.76     |
| 921.50 | 0.0       | 0.37     |

|         |     |       |
|---------|-----|-------|
| 1067.37 | 0.0 | 0.65  |
| 1068.47 | 0.0 | 0.33  |
| 1109.51 | 0.3 | 41.88 |
| 1110.50 | 0.1 | 18.08 |
| 1111.50 | 0.0 | 2.78  |
| 1111.68 | 0.0 | 0.66  |

SPECTRUM - MS

12-18-13\_HMG51\_1149\_MS3\_1109\_01.raw

ITMS + p ESI E Full ms3 1149.00@cid35.00 1109.40@cid35.00 [305.00-1200.00]

Scan #: 1-20

RT: 0.00-5.55

AV: 20

m/z Intensity Relative

|        |     |        |
|--------|-----|--------|
| 385.24 | 0.1 | 1.43   |
| 398.27 | 0.0 | 1.11   |
| 433.24 | 0.2 | 5.12   |
| 472.27 | 0.7 | 17.91  |
| 473.27 | 0.0 | 0.87   |
| 486.28 | 0.5 | 13.45  |
| 487.25 | 0.0 | 1.10   |
| 572.31 | 0.1 | 2.61   |
| 575.32 | 0.0 | 1.27   |
| 586.26 | 0.1 | 1.77   |
| 598.21 | 0.1 | 1.74   |
| 598.38 | 0.0 | 0.60   |
| 625.29 | 0.2 | 5.13   |
| 646.33 | 3.9 | 100.00 |
| 647.35 | 0.5 | 12.66  |
| 660.33 | 1.2 | 31.40  |
| 661.37 | 0.1 | 2.12   |
| 699.36 | 1.3 | 33.56  |
| 700.31 | 0.1 | 2.46   |
| 700.51 | 0.1 | 1.39   |
| 706.41 | 0.0 | 0.80   |
| 708.32 | 0.4 | 9.56   |
| 709.26 | 0.0 | 0.76   |
| 709.48 | 0.0 | 0.97   |
| 738.45 | 0.1 | 3.03   |
| 778.40 | 0.0 | 0.74   |
| 799.40 | 0.3 | 7.98   |
| 800.35 | 0.1 | 1.33   |
| 873.43 | 2.2 | 56.66  |
| 874.45 | 0.4 | 11.50  |
| 882.50 | 0.0 | 0.76   |
| 903.42 | 0.0 | 1.09   |
| 903.55 | 0.0 | 1.00   |
| 905.45 | 0.2 | 4.79   |
| 906.44 | 0.0 | 0.69   |
| 921.41 | 0.0 | 1.06   |

|         |     |      |       |
|---------|-----|------|-------|
| 927.47  | 0.0 | 0.60 |       |
| 928.00  | 0.0 | 0.72 |       |
| 928.41  | 0.0 | 0.69 |       |
| 952.46  | 0.1 | 1.40 |       |
| 992.47  | 0.0 | 1.21 |       |
| 993.24  | 0.0 | 0.64 |       |
| 1011.49 |     | 0.3  | 6.89  |
| 1012.55 |     | 0.1  | 1.33  |
| 1038.47 |     | 0.0  | 0.61  |
| 1067.50 |     | 0.0  | 1.22  |
| 1109.01 |     | 0.0  | 1.04  |
| 1109.53 |     | 2.2  | 55.72 |
| 1109.95 |     | 0.1  | 1.49  |
| 1110.51 |     | 0.9  | 22.15 |

SPECTRUM - MS

12-18-13\_HMG51\_1149\_MS4\_1109\_660\_01.raw

ITMS + p ESI E Full ms4 1149.00@cid35.00 1109.40@cid35.00 661.00@cid35.00 [180.00-700.00]

Scan #: 1-50

RT: 0.00-45.44

AV: 50

m/z Intensity Relative

|        |     |        |
|--------|-----|--------|
| 180.83 | 0.0 | 0.59   |
| 201.39 | 0.0 | 0.56   |
| 211.03 | 0.0 | 0.89   |
| 211.27 | 0.0 | 0.68   |
| 229.11 | 0.0 | 1.02   |
| 244.82 | 0.0 | 0.76   |
| 245.25 | 0.0 | 0.77   |
| 250.12 | 0.0 | 0.89   |
| 259.06 | 0.0 | 1.30   |
| 259.17 | 0.0 | 1.08   |
| 260.20 | 0.0 | 0.64   |
| 297.17 | 0.0 | 0.61   |
| 313.21 | 0.0 | 0.62   |
| 323.26 | 0.0 | 1.12   |
| 350.18 | 0.0 | 0.59   |
| 352.30 | 0.0 | 0.93   |
| 353.28 | 0.0 | 2.18   |
| 368.23 | 0.0 | 0.62   |
| 380.14 | 0.0 | 0.76   |
| 383.21 | 0.0 | 1.54   |
| 398.18 | 0.0 | 7.23   |
| 399.30 | 0.0 | 0.65   |
| 415.29 | 0.0 | 7.49   |
| 424.25 | 0.0 | 1.60   |
| 431.32 | 0.0 | 1.93   |
| 433.24 | 0.1 | 100.00 |
| 434.19 | 0.0 | 6.18   |
| 472.34 | 0.0 | 15.17  |

|        |     |       |
|--------|-----|-------|
| 473.26 | 0.0 | 1.52  |
| 486.19 | 0.0 | 0.57  |
| 512.33 | 0.0 | 1.40  |
| 515.08 | 0.0 | 1.42  |
| 515.29 | 0.0 | 1.12  |
| 554.07 | 0.0 | 0.64  |
| 557.97 | 0.0 | 0.66  |
| 586.31 | 0.1 | 45.76 |
| 587.23 | 0.0 | 1.55  |
| 589.26 | 0.0 | 2.07  |
| 614.27 | 0.0 | 0.82  |
| 614.46 | 0.0 | 1.19  |
| 615.25 | 0.0 | 0.81  |
| 618.32 | 0.0 | 10.07 |
| 618.45 | 0.0 | 6.54  |
| 619.31 | 0.0 | 1.54  |
| 619.46 | 0.0 | 0.65  |
| 660.39 | 0.0 | 20.73 |
| 661.24 | 0.0 | 1.39  |
| 661.43 | 0.0 | 0.60  |
| 698.51 | 0.0 | 0.90  |
| 699.06 | 0.0 | 1.23  |

SPECTRUM - MS

12-18-13\_HMG51\_1149\_MS4\_1109\_646\_01.raw

ITMS + p ESI E Full ms4 1149.00@cid35.00 1109.40@cid35.00 647.00@cid35.00 [175.00-700.00]

Scan #: 1-43

RT: 0.00-21.39

AV: 43

| m/z    | Intensity | Relative |
|--------|-----------|----------|
| 193.93 | 0.0       | 1.00     |
| 204.00 | 0.0       | 4.96     |
| 211.05 | 0.0       | 1.04     |
| 218.09 | 0.0       | 1.24     |
| 220.14 | 0.0       | 1.29     |
| 227.06 | 0.0       | 9.56     |
| 229.11 | 0.0       | 6.03     |
| 232.00 | 0.0       | 0.82     |
| 236.13 | 0.0       | 3.98     |
| 243.05 | 0.0       | 0.94     |
| 245.08 | 0.1       | 37.41    |
| 246.16 | 0.0       | 1.36     |
| 287.10 | 0.0       | 3.25     |
| 308.18 | 0.0       | 0.96     |
| 315.18 | 0.0       | 4.00     |
| 324.05 | 0.0       | 1.14     |
| 343.14 | 0.0       | 1.74     |
| 353.14 | 0.0       | 1.15     |
| 366.21 | 0.0       | 1.74     |
| 368.24 | 0.0       | 2.35     |



|        |     |        |
|--------|-----|--------|
| 369.13 | 0.0 | 1.01   |
| 378.20 | 0.0 | 1.66   |
| 380.20 | 0.0 | 4.35   |
| 382.06 | 0.0 | 1.50   |
| 382.26 | 0.0 | 3.55   |
| 383.21 | 0.0 | 1.01   |
| 384.12 | 0.0 | 3.14   |
| 384.26 | 0.0 | 2.92   |
| 385.17 | 0.1 | 62.09  |
| 386.12 | 0.0 | 3.23   |
| 386.29 | 0.0 | 3.37   |
| 399.14 | 0.0 | 1.03   |
| 424.23 | 0.0 | 7.26   |
| 433.20 | 0.0 | 1.97   |
| 440.22 | 0.0 | 16.70  |
| 441.19 | 0.0 | 2.88   |
| 442.22 | 0.0 | 21.34  |
| 443.19 | 0.0 | 1.88   |
| 443.34 | 0.0 | 1.27   |
| 458.06 | 0.0 | 1.02   |
| 458.26 | 0.0 | 7.27   |
| 542.33 | 0.0 | 0.91   |
| 572.27 | 0.2 | 100.00 |
| 573.29 | 0.0 | 19.59  |
| 575.33 | 0.0 | 21.30  |
| 576.41 | 0.0 | 1.98   |
| 604.37 | 0.0 | 3.39   |
| 646.38 | 0.0 | 21.63  |
| 647.33 | 0.0 | 1.32   |
| 666.89 | 0.0 | 0.82   |

SPECTRUM - MS

12-18-13\_HMG51\_1149\_MS4\_1109\_486\_01.raw

ITMS + p ESI E Full ms4 1149.00@cid35.00 1109.40@cid35.00 487.00@cid35.00 [130.00-500.00]

Scan #: 1-50

RT: 0.00-42.49

AV: 50

| m/z    | Intensity | Relative |
|--------|-----------|----------|
| 133.46 | 0.0       | 1.80     |
| 168.07 | 0.0       | 2.06     |
| 176.16 | 0.0       | 1.50     |
| 180.28 | 0.0       | 0.32     |
| 207.98 | 0.0       | 6.16     |
| 218.11 | 0.0       | 2.91     |
| 219.96 | 0.0       | 0.90     |
| 229.72 | 0.0       | 1.02     |
| 241.02 | 0.0       | 0.54     |
| 242.05 | 0.0       | 0.96     |
| 245.52 | 0.0       | 0.26     |
| 249.99 | 0.0       | 2.23     |

|        |     |        |
|--------|-----|--------|
| 250.13 | 0.0 | 1.02   |
| 252.11 | 0.0 | 14.68  |
| 252.99 | 0.0 | 3.55   |
| 257.05 | 0.0 | 1.41   |
| 257.26 | 0.0 | 2.73   |
| 259.10 | 0.0 | 100.00 |
| 259.51 | 0.0 | 0.00   |
| 259.64 | 0.0 | 0.00   |
| 260.10 | 0.0 | 4.66   |
| 268.03 | 0.0 | 2.43   |
| 268.15 | 0.0 | 6.97   |
| 284.81 | 0.0 | 1.30   |
| 341.23 | 0.0 | 0.38   |
| 357.20 | 0.0 | 1.55   |
| 382.24 | 0.0 | 1.70   |
| 385.30 | 0.0 | 0.87   |
| 390.30 | 0.0 | 0.23   |
| 393.97 | 0.0 | 2.20   |
| 412.14 | 0.0 | 83.38  |
| 412.29 | 0.0 | 39.04  |
| 412.67 | 0.0 | 0.00   |
| 413.17 | 0.0 | 4.51   |
| 413.38 | 0.0 | 1.15   |
| 421.38 | 0.0 | 2.30   |
| 438.94 | 0.0 | 0.45   |
| 444.23 | 0.0 | 49.15  |
| 444.64 | 0.0 | 0.00   |
| 445.27 | 0.0 | 1.33   |
| 454.27 | 0.0 | 4.15   |
| 454.93 | 0.0 | 0.49   |
| 455.33 | 0.0 | 3.49   |
| 456.01 | 0.0 | 1.04   |
| 456.42 | 0.0 | 0.85   |
| 476.08 | 0.0 | 0.38   |
| 486.03 | 0.0 | 6.38   |
| 486.29 | 0.0 | 22.15  |
| 486.70 | 0.0 | 0.00   |
| 487.26 | 0.0 | 2.38   |

SPECTRUM - MS

12-18-13\_HMG51\_1149\_MS4\_1109\_472\_03.raw

ITMS + p ESI E Full ms4 1149.00@cid35.00 1109.40@cid35.00 473.00@cid35.00 [130.00-500.00]

Scan #: 1-100

RT: 0.00-87.25

AV: 100

| m/z    | Intensity | Relative |
|--------|-----------|----------|
| 133.18 | 0.0       | 5.90     |
| 137.57 | 0.0       | 3.06     |
| 165.18 | 0.0       | 4.04     |
| 171.02 | 0.0       | 2.85     |

|        |     |        |
|--------|-----|--------|
| 179.97 | 0.0 | 7.91   |
| 181.76 | 0.0 | 4.16   |
| 187.98 | 0.0 | 2.61   |
| 198.00 | 0.0 | 3.08   |
| 203.99 | 0.0 | 2.78   |
| 208.11 | 0.0 | 2.89   |
| 220.11 | 0.0 | 7.46   |
| 224.08 | 0.0 | 1.41   |
| 226.34 | 0.0 | 5.20   |
| 227.02 | 0.0 | 82.46  |
| 228.09 | 0.0 | 11.24  |
| 230.92 | 0.0 | 3.11   |
| 236.09 | 0.0 | 6.44   |
| 236.20 | 0.0 | 3.76   |
| 236.98 | 0.0 | 5.61   |
| 240.50 | 0.0 | 4.28   |
| 245.03 | 0.0 | 25.52  |
| 245.21 | 0.0 | 6.52   |
| 252.76 | 0.0 | 1.43   |
| 268.11 | 0.0 | 100.00 |
| 269.23 | 0.0 | 9.84   |
| 309.02 | 0.0 | 3.00   |
| 314.85 | 0.0 | 4.02   |
| 315.23 | 0.0 | 40.56  |
| 316.14 | 0.0 | 2.31   |
| 324.12 | 0.0 | 4.21   |
| 325.26 | 0.0 | 1.61   |
| 327.22 | 0.0 | 2.67   |
| 380.10 | 0.0 | 2.19   |
| 381.18 | 0.0 | 4.13   |
| 381.33 | 0.0 | 2.62   |
| 396.36 | 0.0 | 1.75   |
| 398.17 | 0.0 | 97.25  |
| 399.10 | 0.0 | 8.81   |
| 399.29 | 0.0 | 6.54   |
| 412.27 | 0.0 | 1.68   |
| 430.30 | 0.0 | 10.31  |
| 440.14 | 0.0 | 9.87   |
| 440.31 | 0.0 | 6.22   |
| 442.25 | 0.0 | 9.11   |
| 442.64 | 0.0 | 2.58   |
| 443.25 | 0.0 | 4.33   |
| 472.27 | 0.0 | 16.20  |
| 476.51 | 0.0 | 6.84   |
| 485.85 | 0.0 | 3.56   |
| 496.94 | 0.0 | 3.50   |

SPECTRUM - MS

12-17-13\_HMG51\_1149\_MS3\_830\_01.raw

ITMS + p ESI E Full ms3 1149.00@cid35.00 830.40@cid35.00 [225.00-2000.00]

Scan #: 1-20

RT: 0.00-4.90

AV: 20

| m/z     | Intensity | Relative |
|---------|-----------|----------|
| 386.16  | 0.8       | 1.30     |
| 444.25  | 2.2       | 3.70     |
| 458.25  | 2.3       | 3.86     |
| 486.28  | 45.7      | 77.63    |
| 487.27  | 9.8       | 16.70    |
| 488.27  | 1.4       | 2.35     |
| 514.27  | 0.8       | 1.43     |
| 534.34  | 1.4       | 2.45     |
| 598.30  | 4.2       | 7.13     |
| 598.82  | 2.9       | 4.94     |
| 599.34  | 1.0       | 1.71     |
| 630.30  | 1.7       | 2.91     |
| 676.32  | 2.0       | 3.34     |
| 677.31  | 0.7       | 1.15     |
| 718.34  | 2.4       | 4.09     |
| 719.35  | 0.9       | 1.55     |
| 720.90  | 1.4       | 2.44     |
| 721.39  | 1.3       | 2.14     |
| 738.43  | 29.9      | 50.83    |
| 739.43  | 11.0      | 18.65    |
| 740.45  | 2.0       | 3.36     |
| 760.33  | 1.4       | 2.39     |
| 776.87  | 1.0       | 1.67     |
| 777.38  | 0.9       | 1.56     |
| 780.43  | 1.3       | 2.19     |
| 780.94  | 1.1       | 1.92     |
| 813.91  | 1.9       | 3.24     |
| 814.41  | 1.5       | 2.51     |
| 814.93  | 2.5       | 4.20     |
| 815.43  | 2.2       | 3.72     |
| 815.96  | 1.0       | 1.70     |
| 829.96  | 11.7      | 19.94    |
| 830.46  | 10.1      | 17.19    |
| 830.96  | 5.2       | 8.82     |
| 831.45  | 1.1       | 1.86     |
| 921.43  | 12.4      | 21.07    |
| 922.45  | 5.4       | 9.18     |
| 923.45  | 1.8       | 3.13     |
| 983.50  | 4.6       | 7.80     |
| 984.50  | 2.3       | 3.94     |
| 1065.46 | 4.2       | 7.14     |
| 1066.47 | 2.2       | 3.81     |
| 1153.48 | 1.1       | 1.92     |
| 1173.59 | 58.9      | 100.00   |
| 1174.59 | 34.8      | 59.01    |
| 1175.57 | 10.3      | 17.55    |
| 1176.58 | 1.2       | 2.10     |

|         |     |      |
|---------|-----|------|
| 1636.78 | 1.9 | 3.17 |
| 1637.79 | 1.7 | 2.85 |
| 1638.81 | 0.9 | 1.49 |

SPECTRUM - MS

12-17-13\_HMG51\_1149\_MS4\_830\_921\_01.raw

ITMS + p ESI E Full ms4 1149.00@cid35.00 830.40@cid35.00 922.00@cid35.00 [250.00-1000.00]

Scan #: 1-50

RT: 0.00-25.24

AV: 50

| m/z | Intensity | Relative |
|-----|-----------|----------|
|-----|-----------|----------|

|        |     |        |
|--------|-----|--------|
| 268.10 | 0.0 | 1.27   |
| 301.16 | 0.0 | 0.54   |
| 329.17 | 0.0 | 0.63   |
| 444.25 | 0.1 | 1.95   |
| 454.22 | 0.0 | 0.61   |
| 458.24 | 3.5 | 100.00 |
| 459.24 | 0.6 | 17.42  |
| 460.21 | 0.1 | 2.01   |
| 486.28 | 2.1 | 60.03  |
| 487.26 | 0.4 | 12.20  |
| 488.28 | 0.1 | 1.50   |
| 546.25 | 0.1 | 3.11   |
| 547.27 | 0.0 | 0.54   |
| 574.31 | 0.3 | 7.26   |
| 575.33 | 0.1 | 1.96   |
| 620.29 | 0.1 | 2.93   |
| 621.31 | 0.0 | 0.67   |
| 646.29 | 0.1 | 1.43   |
| 676.31 | 0.5 | 14.28  |
| 677.32 | 0.2 | 4.30   |
| 678.34 | 0.0 | 1.01   |
| 692.31 | 0.0 | 1.28   |
| 694.33 | 0.4 | 10.31  |
| 695.32 | 0.1 | 2.44   |
| 696.39 | 0.2 | 6.74   |
| 703.34 | 0.1 | 2.85   |
| 704.31 | 0.0 | 0.77   |
| 724.40 | 0.3 | 7.47   |
| 764.37 | 1.0 | 27.60  |
| 765.37 | 0.3 | 8.65   |
| 766.38 | 0.1 | 1.54   |
| 793.43 | 0.0 | 0.66   |
| 815.31 | 0.1 | 1.67   |
| 815.48 | 0.0 | 1.36   |
| 816.41 | 0.1 | 2.00   |
| 829.32 | 0.0 | 0.85   |
| 829.49 | 0.0 | 0.87   |
| 847.37 | 0.1 | 4.00   |
| 848.37 | 0.1 | 3.20   |

|        |     |      |
|--------|-----|------|
| 850.43 | 0.2 | 4.55 |
| 851.51 | 0.0 | 0.67 |
| 879.56 | 0.1 | 2.25 |
| 880.43 | 0.1 | 1.82 |
| 889.39 | 0.3 | 9.86 |
| 890.39 | 0.1 | 3.65 |
| 891.40 | 0.2 | 5.34 |
| 892.52 | 0.0 | 1.10 |
| 921.42 | 0.2 | 4.68 |
| 922.46 | 0.1 | 2.13 |
| 923.36 | 0.0 | 0.64 |

SPECTRUM - MS

12-17-13\_HMG51\_1149\_MS5\_830\_921\_486\_01.raw

ITMS + p ESI E Full ms5 1149.00@cid35.00 830.40@cid35.00 922.00@cid35.00 487.00@cid35.00  
[130.00-500.00]

Scan #: 1-18

RT: 0.00-8.23

AV: 18

m/z Intensity Relative

|        |     |       |
|--------|-----|-------|
| 146.82 | 0.0 | 0.91  |
| 161.91 | 0.0 | 0.23  |
| 178.11 | 0.0 | 0.92  |
| 179.05 | 0.0 | 0.31  |
| 194.21 | 0.0 | 0.27  |
| 198.98 | 0.0 | 0.30  |
| 220.09 | 0.0 | 5.21  |
| 226.99 | 0.0 | 0.46  |
| 241.12 | 0.0 | 4.12  |
| 242.09 | 0.0 | 1.38  |
| 243.27 | 0.0 | 0.67  |
| 256.92 | 0.0 | 1.34  |
| 257.11 | 0.0 | 1.73  |
| 259.08 | 0.1 | 18.07 |
| 260.00 | 0.0 | 1.14  |
| 268.09 | 0.0 | 3.94  |
| 269.09 | 0.0 | 0.53  |
| 281.94 | 0.0 | 0.39  |
| 283.40 | 0.0 | 1.54  |
| 297.21 | 0.0 | 2.19  |
| 300.89 | 0.0 | 0.31  |
| 301.05 | 0.0 | 0.63  |
| 303.88 | 0.0 | 1.41  |
| 326.47 | 0.0 | 0.37  |
| 329.14 | 0.1 | 30.74 |
| 329.40 | 0.0 | 1.38  |
| 330.05 | 0.0 | 0.75  |
| 330.21 | 0.0 | 0.85  |
| 330.33 | 0.0 | 0.49  |
| 331.14 | 0.0 | 0.55  |

|        |     |        |
|--------|-----|--------|
| 353.12 | 0.0 | 0.27   |
| 373.10 | 0.0 | 1.48   |
| 382.15 | 0.0 | 0.62   |
| 398.03 | 0.0 | 1.71   |
| 411.97 | 0.0 | 1.04   |
| 415.25 | 0.0 | 2.66   |
| 415.43 | 0.0 | 0.52   |
| 424.12 | 0.0 | 0.61   |
| 431.17 | 0.0 | 1.56   |
| 444.27 | 0.3 | 100.00 |
| 445.24 | 0.0 | 12.00  |
| 445.45 | 0.0 | 2.00   |
| 446.18 | 0.0 | 1.36   |
| 446.29 | 0.0 | 0.93   |
| 455.19 | 0.0 | 0.65   |
| 456.25 | 0.0 | 6.88   |
| 479.54 | 0.0 | 0.31   |
| 486.29 | 0.2 | 54.24  |
| 487.27 | 0.0 | 14.52  |
| 488.34 | 0.0 | 2.20   |

SPECTRUM - MS

12-17-13\_HMG51\_1149\_MS5\_830\_921\_458\_01.raw

ITMS + p ESI E Full ms5 1149.00@cid35.00 830.40@cid35.00 922.00@cid35.00 459.00@cid35.00

[125.00-500.00]

Scan #: 1-50

RT: 0.00-20.32

AV: 50

| m/z    | Intensity | Relative |
|--------|-----------|----------|
| 149.02 | 0.0       | 1.36     |
| 178.07 | 0.0       | 0.41     |
| 179.76 | 0.0       | 0.48     |
| 180.01 | 0.0       | 3.48     |
| 181.11 | 0.0       | 0.40     |
| 188.01 | 0.0       | 1.09     |
| 190.09 | 0.0       | 0.47     |
| 193.91 | 0.0       | 0.34     |
| 194.11 | 0.0       | 0.51     |
| 196.09 | 0.0       | 0.35     |
| 204.04 | 0.0       | 1.93     |
| 213.04 | 0.0       | 12.13    |
| 214.03 | 0.0       | 0.54     |
| 217.97 | 0.0       | 0.46     |
| 218.14 | 0.0       | 0.82     |
| 220.04 | 0.0       | 8.50     |
| 220.89 | 0.0       | 0.66     |
| 231.06 | 0.1       | 12.71    |
| 232.01 | 0.0       | 0.50     |
| 236.15 | 0.0       | 4.65     |
| 236.99 | 0.0       | 0.37     |

|        |     |        |
|--------|-----|--------|
| 240.55 | 0.0 | 0.38   |
| 262.80 | 0.0 | 0.34   |
| 268.11 | 0.4 | 100.00 |
| 269.09 | 0.0 | 7.90   |
| 270.13 | 0.0 | 0.67   |
| 273.24 | 0.0 | 0.54   |
| 287.14 | 0.0 | 0.43   |
| 301.14 | 0.1 | 28.13  |
| 302.02 | 0.0 | 1.92   |
| 302.27 | 0.0 | 1.29   |
| 303.07 | 0.0 | 0.50   |
| 313.10 | 0.0 | 0.36   |
| 352.17 | 0.0 | 0.47   |
| 353.14 | 0.0 | 0.33   |
| 366.16 | 0.0 | 2.23   |
| 371.06 | 0.0 | 0.31   |
| 371.26 | 0.0 | 0.36   |
| 384.22 | 0.0 | 2.06   |
| 385.10 | 0.0 | 1.09   |
| 385.21 | 0.0 | 0.73   |
| 416.08 | 0.0 | 0.77   |
| 422.52 | 0.0 | 0.45   |
| 426.12 | 0.0 | 4.59   |
| 427.27 | 0.0 | 1.23   |
| 428.18 | 0.0 | 4.36   |
| 429.27 | 0.0 | 1.10   |
| 458.23 | 0.1 | 21.53  |
| 459.32 | 0.0 | 1.84   |
| 460.22 | 0.0 | 0.60   |

SPECTRUM - MS

12-20-13\_HMG51\_MS4\_1149\_1558\_1095\_01.raw

ITMS + p ESI E Full ms4 1149.00@cid35.00 1559.40@cid35.00 1096.00@cid35.00 [300.00-1100.00]

Scan #: 1-21

RT: 0.00-9.38

AV: 21

m/z Intensity Relative

|        |     |       |
|--------|-----|-------|
| 385.21 | 0.0 | 2.27  |
| 410.08 | 0.0 | 1.36  |
| 422.00 | 0.0 | 0.71  |
| 440.15 | 0.0 | 1.24  |
| 458.25 | 0.2 | 24.03 |
| 459.12 | 0.0 | 0.97  |
| 459.37 | 0.0 | 1.07  |
| 472.26 | 0.2 | 36.20 |
| 473.17 | 0.0 | 1.63  |
| 473.31 | 0.0 | 1.76  |
| 572.28 | 0.0 | 1.91  |
| 575.30 | 0.0 | 0.97  |
| 612.25 | 0.0 | 2.26  |



|         |     |        |
|---------|-----|--------|
| 646.39  | 0.2 | 37.52  |
| 647.29  | 0.1 | 9.21   |
| 660.32  | 0.3 | 51.65  |
| 661.36  | 0.1 | 9.85   |
| 678.10  | 0.0 | 0.83   |
| 785.30  | 0.0 | 4.29   |
| 785.50  | 0.0 | 0.98   |
| 794.50  | 0.0 | 0.85   |
| 795.29  | 0.0 | 0.75   |
| 815.41  | 0.0 | 4.08   |
| 836.37  | 0.0 | 1.71   |
| 859.40  | 0.1 | 20.32  |
| 860.35  | 0.0 | 3.95   |
| 861.49  | 0.0 | 0.91   |
| 864.26  | 0.0 | 0.75   |
| 866.16  | 0.0 | 0.88   |
| 866.38  | 0.0 | 2.70   |
| 866.57  | 0.0 | 2.51   |
| 867.57  | 0.0 | 1.46   |
| 868.45  | 0.0 | 1.19   |
| 889.33  | 0.1 | 20.28  |
| 889.52  | 0.1 | 16.53  |
| 890.41  | 0.0 | 6.63   |
| 891.41  | 0.0 | 5.07   |
| 927.38  | 0.0 | 0.71   |
| 938.53  | 0.0 | 3.19   |
| 939.46  | 0.0 | 0.87   |
| 1017.40 | 0.0 | 0.94   |
| 1022.49 | 0.0 | 0.86   |
| 1023.36 | 0.0 | 1.54   |
| 1024.41 | 0.0 | 5.31   |
| 1063.57 | 0.0 | 1.42   |
| 1095.47 | 0.7 | 100.00 |
| 1096.45 | 0.2 | 27.15  |
| 1096.64 | 0.1 | 20.61  |
| 1097.33 | 0.0 | 2.23   |
| 1097.66 | 0.0 | 2.01   |

SPECTRUM - MS

12-20-13\_HMG51\_MS5\_1149\_1558\_1095\_472\_02.raw

ITMS + p ESI E Full ms5 1149.00@cid35.00 1559.40@cid35.00 1096.00@cid35.00 473.00@cid35.00  
[130.00-500.00]

Scan #: 1-76

RT: 0.00-173.92

AV: 76

| m/z    | Intensity | Relative |
|--------|-----------|----------|
| 148.91 | 0.0       | 3.16     |
| 161.97 | 0.0       | 2.07     |
| 165.16 | 0.0       | 2.14     |
| 170.98 | 0.0       | 3.46     |

|        |     |        |
|--------|-----|--------|
| 178.07 | 0.0 | 2.29   |
| 194.05 | 0.0 | 5.17   |
| 204.12 | 0.0 | 5.86   |
| 220.05 | 0.0 | 8.65   |
| 227.08 | 0.0 | 49.60  |
| 228.13 | 0.0 | 7.41   |
| 236.12 | 0.0 | 8.17   |
| 240.04 | 0.0 | 3.08   |
| 245.06 | 0.0 | 34.73  |
| 250.13 | 0.0 | 5.10   |
| 268.09 | 0.0 | 100.00 |
| 269.15 | 0.0 | 5.02   |
| 276.83 | 0.0 | 2.89   |
| 283.16 | 0.0 | 4.98   |
| 286.00 | 0.0 | 1.96   |
| 287.14 | 0.0 | 4.24   |
| 315.08 | 0.0 | 44.35  |
| 315.22 | 0.0 | 35.37  |
| 322.35 | 0.0 | 2.25   |
| 323.69 | 0.0 | 3.45   |
| 327.09 | 0.0 | 2.28   |
| 330.16 | 0.0 | 4.05   |
| 357.24 | 0.0 | 2.76   |
| 367.23 | 0.0 | 2.66   |
| 368.82 | 0.0 | 3.15   |
| 374.65 | 0.0 | 2.90   |
| 379.90 | 0.0 | 1.99   |
| 380.20 | 0.0 | 4.02   |
| 396.10 | 0.0 | 3.30   |
| 398.18 | 0.0 | 11.05  |
| 398.30 | 0.0 | 10.97  |
| 399.17 | 0.0 | 6.10   |
| 401.10 | 0.0 | 3.82   |
| 408.24 | 0.0 | 4.24   |
| 430.25 | 0.0 | 5.78   |
| 437.55 | 0.0 | 1.93   |
| 440.02 | 0.0 | 12.13  |
| 440.28 | 0.0 | 22.13  |
| 441.12 | 0.0 | 9.46   |
| 441.39 | 0.0 | 9.89   |
| 441.97 | 0.0 | 2.28   |
| 442.21 | 0.0 | 2.10   |
| 454.99 | 0.0 | 3.29   |
| 456.28 | 0.0 | 2.05   |
| 467.20 | 0.0 | 2.50   |
| 472.33 | 0.0 | 2.90   |

HMG 54 Mass spectral peak lists

SPECTRUM - MS

12-18-13\_HMG54\_1235\_MS2\_01.raw

ITMS + p ESI E Full ms2 1236.00@cid35.00 [340.00-2000.00]

Scan #: 1-20

RT: 0.00-1.50

AV: 20

| m/z     | Intensity | Relative |
|---------|-----------|----------|
| 486.27  | 6743.1    | 7.35     |
| 646.30  | 5244.1    | 5.72     |
| 660.34  | 5121.1    | 5.58     |
| 685.38  | 3999.4    | 4.36     |
| 685.89  | 2799.4    | 3.05     |
| 692.39  | 5575.2    | 6.08     |
| 692.89  | 3952.5    | 4.31     |
| 693.39  | 1712.6    | 1.87     |
| 724.38  | 2590.2    | 2.82     |
| 738.41  | 4093.4    | 4.46     |
| 900.94  | 6998.8    | 7.63     |
| 901.45  | 6366.0    | 6.94     |
| 901.94  | 4034.6    | 4.40     |
| 902.45  | 1684.8    | 1.84     |
| 916.96  | 7600.2    | 8.29     |
| 917.45  | 6455.0    | 7.04     |
| 917.96  | 3066.1    | 3.34     |
| 1003.99 | 91701.4   | 100.00   |
| 1004.50 | 84882.0   | 92.56    |
| 1004.98 | 44477.3   | 48.50    |
| 1005.50 | 15524.1   | 16.93    |
| 1006.01 | 2791.7    | 3.04     |
| 1109.48 | 4689.8    | 5.11     |
| 1110.49 | 2274.7    | 2.48     |
| 1117.53 | 1719.0    | 1.87     |
| 1118.05 | 2210.1    | 2.41     |
| 1132.54 | 9841.1    | 10.73    |
| 1133.04 | 9972.8    | 10.88    |
| 1133.54 | 6640.8    | 7.24     |
| 1134.02 | 2988.6    | 3.26     |
| 1141.51 | 2349.9    | 2.56     |
| 1142.03 | 2115.4    | 2.31     |
| 1235.64 | 17456.2   | 19.04    |
| 1236.11 | 21173.9   | 23.09    |
| 1236.58 | 15104.1   | 16.47    |
| 1237.07 | 7590.8    | 8.28     |
| 1237.56 | 1977.0    | 2.16     |
| 1347.59 | 3108.0    | 3.39     |
| 1348.61 | 2128.1    | 2.32     |
| 1361.62 | 13506.7   | 14.73    |
| 1362.63 | 8789.4    | 9.58     |

|         |        |      |
|---------|--------|------|
| 1363.64 | 3331.8 | 3.63 |
| 1732.74 | 1881.3 | 2.05 |
| 1778.83 | 1948.3 | 2.12 |
| 1779.84 | 1662.2 | 1.81 |
| 1810.83 | 3484.0 | 3.80 |
| 1811.84 | 2764.8 | 3.02 |
| 1984.99 | 9089.0 | 9.91 |
| 1986.00 | 8202.8 | 8.95 |
| 1986.98 | 4295.8 | 4.68 |

SPECTRUM - MS

12-18-13\_HMG54\_1235\_MS3\_1004\_01.raw

ITMS + p ESI E Full ms3 1236.00@cid35.00 1004.60@cid35.00 [275.00-2000.00]

Scan #: 1-20

RT: 0.00-1.73

AV: 20

m/z Intensity Relative

|        |         |       |
|--------|---------|-------|
| 385.15 | 360.1   | 2.50  |
| 534.33 | 839.6   | 5.82  |
| 589.33 | 428.7   | 2.97  |
| 646.30 | 8102.7  | 56.16 |
| 647.31 | 1873.9  | 12.99 |
| 660.33 | 4156.3  | 28.81 |
| 661.34 | 1000.8  | 6.94  |
| 664.38 | 418.6   | 2.90  |
| 685.37 | 3316.4  | 22.99 |
| 685.88 | 1981.3  | 13.73 |
| 686.37 | 571.1   | 3.96  |
| 692.38 | 11591.5 | 80.35 |
| 692.88 | 6533.6  | 45.29 |
| 693.37 | 2110.2  | 14.63 |
| 693.87 | 421.3   | 2.92  |
| 704.30 | 580.6   | 4.02  |
| 706.38 | 1358.4  | 9.42  |
| 724.38 | 2154.8  | 14.94 |
| 725.39 | 649.2   | 4.50  |
| 738.41 | 2279.1  | 15.80 |
| 739.40 | 651.8   | 4.52  |
| 746.29 | 451.5   | 3.13  |
| 798.91 | 584.7   | 4.05  |
| 799.39 | 423.9   | 2.94  |
| 863.91 | 559.6   | 3.88  |
| 864.42 | 432.4   | 3.00  |
| 900.93 | 13568.4 | 94.05 |
| 901.44 | 10195.2 | 70.67 |
| 901.93 | 5397.8  | 37.42 |
| 902.44 | 2061.9  | 14.29 |
| 902.96 | 542.8   | 3.76  |
| 909.95 | 1137.6  | 7.89  |
| 910.45 | 766.3   | 5.31  |

|         |         |        |
|---------|---------|--------|
| 1003.99 | 5054.6  | 35.04  |
| 1004.49 | 4773.6  | 33.09  |
| 1004.97 | 2592.3  | 17.97  |
| 1005.49 | 927.6   | 6.43   |
| 1141.50 | 391.7   | 2.72   |
| 1155.52 | 803.0   | 5.57   |
| 1156.53 | 356.7   | 2.47   |
| 1253.52 | 747.9   | 5.18   |
| 1254.54 | 373.6   | 2.59   |
| 1269.55 | 975.7   | 6.76   |
| 1270.56 | 456.4   | 3.16   |
| 1347.60 | 4216.2  | 29.23  |
| 1348.62 | 2170.9  | 15.05  |
| 1349.61 | 603.1   | 4.18   |
| 1361.62 | 14426.6 | 100.00 |
| 1362.63 | 7847.4  | 54.39  |
| 1363.64 | 2260.5  | 15.67  |

SPECTRUM - MS

12-18-13\_HMG54\_1235\_MS4\_1004\_1347\_01.raw

ITMS + p ESI E Full ms4 1236.00@cid35.00 1004.60@cid35.00 1348.00@cid35.00 [370.00-1400.00]

Scan #: 1-20

RT: 0.00-4.56

AV: 20

m/z Intensity Relative

|        |       |       |
|--------|-------|-------|
| 435.26 | 7.2   | 0.84  |
| 436.25 | 1.3   | 0.15  |
| 456.31 | 1.3   | 0.16  |
| 470.28 | 1.3   | 0.15  |
| 472.30 | 0.9   | 0.11  |
| 474.29 | 3.1   | 0.36  |
| 486.33 | 4.7   | 0.55  |
| 487.33 | 0.9   | 0.10  |
| 492.34 | 1.5   | 0.18  |
| 502.30 | 2.3   | 0.26  |
| 516.32 | 2.1   | 0.24  |
| 534.35 | 193.1 | 22.45 |
| 535.35 | 36.5  | 4.24  |
| 536.32 | 3.0   | 0.35  |
| 562.32 | 1.0   | 0.12  |
| 572.30 | 0.7   | 0.08  |
| 590.33 | 1.8   | 0.21  |
| 625.34 | 8.5   | 0.99  |
| 626.35 | 1.9   | 0.22  |
| 646.33 | 19.4  | 2.25  |
| 647.34 | 3.8   | 0.44  |
| 676.34 | 1.7   | 0.20  |
| 692.48 | 1.2   | 0.14  |
| 706.41 | 0.9   | 0.11  |
| 722.40 | 0.9   | 0.11  |

|         |       |        |
|---------|-------|--------|
| 724.41  | 860.2 | 100.00 |
| 725.42  | 209.1 | 24.30  |
| 726.43  | 25.1  | 2.92   |
| 752.43  | 0.8   | 0.09   |
| 836.43  | 4.8   | 0.56   |
| 837.41  | 1.2   | 0.14   |
| 877.48  | 0.7   | 0.08   |
| 898.51  | 0.6   | 0.07   |
| 919.46  | 1.7   | 0.19   |
| 921.49  | 0.9   | 0.10   |
| 1067.53 | 7.8   | 0.90   |
| 1068.51 | 3.1   | 0.36   |
| 1141.55 | 45.8  | 5.33   |
| 1142.56 | 18.4  | 2.14   |
| 1143.58 | 20.7  | 2.40   |
| 1144.59 | 6.6   | 0.77   |
| 1145.59 | 1.4   | 0.17   |
| 1159.58 | 2.8   | 0.33   |
| 1160.59 | 1.4   | 0.16   |
| 1248.60 | 4.5   | 0.52   |
| 1249.71 | 1.1   | 0.13   |
| 1315.64 | 1.9   | 0.22   |
| 1347.66 | 124.5 | 14.47  |
| 1348.66 | 76.8  | 8.93   |
| 1349.67 | 21.4  | 2.49   |

SPECTRUM - MS

12-18-13\_HMG54\_1235\_MS4\_1004\_1361\_01.raw

ITMS + p ESI E Full ms4 1236.00@cid35.00 1004.60@cid35.00 1362.00@cid35.00 [370.00-2000.00]

Scan #: 1-20

RT: 0.00-5.34

AV: 20

| m/z    | Intensity | Relative |
|--------|-----------|----------|
| 435.26 | 19.8      | 1.16     |
| 474.30 | 8.2       | 0.48     |
| 486.33 | 20.0      | 1.18     |
| 502.30 | 7.4       | 0.44     |
| 516.31 | 9.1       | 0.53     |
| 534.35 | 534.2     | 31.41    |
| 535.35 | 110.9     | 6.52     |
| 536.34 | 10.4      | 0.61     |
| 562.33 | 15.0      | 0.88     |
| 590.34 | 9.8       | 0.57     |
| 625.34 | 22.9      | 1.35     |
| 639.35 | 10.8      | 0.64     |
| 644.33 | 7.9       | 0.46     |
| 646.33 | 15.7      | 0.92     |
| 660.35 | 81.5      | 4.80     |
| 661.36 | 17.6      | 1.04     |
| 662.36 | 11.4      | 0.67     |

|         |        |       |        |
|---------|--------|-------|--------|
| 706.41  | 12.0   | 0.71  |        |
| 720.38  | 8.3    | 0.49  |        |
| 724.41  | 1700.4 |       | 100.00 |
| 725.42  | 441.2  | 25.95 |        |
| 726.43  | 55.9   | 3.28  |        |
| 738.44  | 585.2  | 34.42 |        |
| 739.44  | 152.1  | 8.94  |        |
| 740.45  | 19.4   | 1.14  |        |
| 748.41  | 10.7   | 0.63  |        |
| 850.43  | 39.4   | 2.32  |        |
| 851.42  | 11.5   | 0.68  |        |
| 863.46  | 11.2   | 0.66  |        |
| 877.48  | 11.4   | 0.67  |        |
| 919.48  | 18.6   | 1.09  |        |
| 921.47  | 9.4    | 0.55  |        |
| 1081.52 |        | 114.1 | 6.71   |
| 1082.53 |        | 48.1  | 2.83   |
| 1083.54 |        | 10.8  | 0.63   |
| 1143.58 |        | 43.0  | 2.53   |
| 1144.59 |        | 19.4  | 1.14   |
| 1155.57 |        | 306.3 | 18.01  |
| 1156.57 |        | 129.2 | 7.60   |
| 1157.58 |        | 83.8  | 4.93   |
| 1158.60 |        | 25.2  | 1.48   |
| 1173.59 |        | 32.2  | 1.90   |
| 1174.59 |        | 14.4  | 0.85   |
| 1262.62 |        | 29.1  | 1.71   |
| 1263.62 |        | 14.2  | 0.84   |
| 1329.66 |        | 18.2  | 1.07   |
| 1330.68 |        | 8.4   | 0.49   |
| 1361.70 |        | 430.0 | 25.29  |
| 1362.68 |        | 258.7 | 15.22  |
| 1363.68 |        | 76.0  | 4.47   |

SPECTRUM - MS

12-18-13\_HMG54\_1235\_MS3\_1732\_01.raw

ITMS + p ESI E Full ms3 1236.00@cid35.00 1733.40@cid35.00 [475.00-1800.00]

Scan #: 1-20

RT: 0.00-3.43

AV: 20

m/z Intensity Relative

|        |      |       |
|--------|------|-------|
| 486.38 | 0.6  | 0.56  |
| 646.31 | 41.4 | 40.13 |
| 647.31 | 9.6  | 9.28  |
| 648.30 | 1.5  | 1.47  |
| 708.36 | 0.6  | 0.59  |
| 868.47 | 1.2  | 1.19  |
| 873.49 | 1.9  | 1.85  |
| 874.31 | 0.6  | 0.57  |
| 903.44 | 0.6  | 0.59  |

|         |     |              |
|---------|-----|--------------|
| 989.45  | 0.8 | 0.79         |
| 1063.49 |     | 15.8 15.30   |
| 1064.51 |     | 7.3 7.08     |
| 1065.49 |     | 2.8 2.67     |
| 1109.50 |     | 40.1 38.83   |
| 1110.50 |     | 16.7 16.15   |
| 1111.57 |     | 2.4 2.33     |
| 1269.56 |     | 103.2 100.00 |
| 1270.57 |     | 49.5 48.02   |
| 1271.55 |     | 11.9 11.54   |
| 1283.53 |     | 0.6 0.58     |
| 1290.57 |     | 1.8 1.79     |
| 1291.62 |     | 0.5 0.50     |
| 1313.47 |     | 1.3 1.22     |
| 1313.68 |     | 0.8 0.81     |
| 1314.61 |     | 0.9 0.88     |
| 1329.47 |     | 0.9 0.85     |
| 1329.69 |     | 0.9 0.88     |
| 1331.57 |     | 12.9 12.55   |
| 1332.59 |     | 6.5 6.30     |
| 1333.70 |     | 1.0 1.00     |
| 1401.73 |     | 2.7 2.66     |
| 1402.48 |     | 0.8 0.74     |
| 1402.68 |     | 1.2 1.17     |
| 1496.67 |     | 8.3 8.05     |
| 1497.81 |     | 2.2 2.15     |
| 1498.80 |     | 0.9 0.89     |
| 1526.63 |     | 38.2 37.01   |
| 1527.64 |     | 22.8 22.08   |
| 1528.65 |     | 13.4 12.95   |
| 1529.73 |     | 1.7 1.61     |
| 1530.50 |     | 0.6 0.54     |
| 1530.74 |     | 0.7 0.64     |
| 1544.65 |     | 1.8 1.70     |
| 1545.68 |     | 1.1 1.02     |
| 1658.61 |     | 1.0 0.93     |
| 1658.81 |     | 0.7 0.68     |
| 1659.73 |     | 0.6 0.62     |
| 1732.77 |     | 43.5 42.19   |
| 1733.77 |     | 37.8 36.64   |
| 1734.78 |     | 18.9 18.32   |

SPECTRUM - MS

12-18-13\_HMG54\_1235\_MS4\_1732\_1109\_01.raw

ITMS + p ESI E Full ms4 1236.00@cid35.00 1733.40@cid35.00 1110.00@cid35.00 [305.00-1200.00]

Scan #: 1-20

RT: 0.00-3.29

AV: 20

m/z Intensity Relative

384.18 0.1 0.83



|         |      |        |       |
|---------|------|--------|-------|
| 385.15  | 0.4  | 3.81   |       |
| 440.12  | 0.1  | 0.65   |       |
| 442.31  | 0.1  | 0.71   |       |
| 454.14  | 0.1  | 0.57   |       |
| 458.32  | 0.1  | 0.95   |       |
| 472.36  | 0.1  | 0.53   |       |
| 486.32  | 1.8  | 17.53  |       |
| 487.35  | 0.1  | 1.18   |       |
| 504.39  | 0.1  | 0.56   |       |
| 572.22  | 0.1  | 1.16   |       |
| 573.32  | 0.1  | 1.05   |       |
| 575.31  | 0.2  | 1.44   |       |
| 598.13  | 0.1  | 0.64   |       |
| 598.36  | 0.1  | 0.66   |       |
| 634.28  | 0.1  | 0.55   |       |
| 646.32  | 10.5 | 100.00 |       |
| 647.34  | 1.4  | 13.20  |       |
| 648.36  | 0.1  | 1.03   |       |
| 660.37  | 0.1  | 0.67   |       |
| 690.22  | 0.1  | 0.74   |       |
| 690.34  | 0.1  | 0.80   |       |
| 690.47  | 0.1  | 0.91   |       |
| 708.25  | 0.3  | 2.84   |       |
| 708.41  | 0.4  | 3.41   |       |
| 709.24  | 0.1  | 0.71   |       |
| 709.48  | 0.1  | 0.72   |       |
| 778.26  | 0.1  | 1.15   |       |
| 799.17  | 0.1  | 1.11   |       |
| 799.45  | 0.3  | 2.60   |       |
| 800.15  | 0.1  | 0.79   |       |
| 873.29  | 1.6  | 15.49  |       |
| 873.50  | 1.6  | 15.25  |       |
| 874.01  | 0.0  | 0.47   |       |
| 874.47  | 0.5  | 4.92   |       |
| 875.38  | 0.1  | 0.73   |       |
| 875.50  | 0.0  | 0.47   |       |
| 891.54  | 0.1  | 0.59   |       |
| 904.52  | 0.1  | 0.53   |       |
| 905.30  | 0.2  | 1.75   |       |
| 905.46  | 0.1  | 0.91   |       |
| 905.57  | 0.1  | 0.74   |       |
| 906.35  | 0.1  | 0.53   |       |
| 921.45  | 0.1  | 0.64   |       |
| 1038.56 |      | 0.1    | 0.51  |
| 1068.65 |      | 0.1    | 0.63  |
| 1080.44 |      | 0.0    | 0.47  |
| 1109.49 |      | 1.9    | 17.78 |
| 1110.39 |      | 0.5    | 4.49  |
| 1110.57 |      | 0.4    | 3.84  |

SPECTRUM - MS

12-18-13\_HMG54\_1235\_MS5\_1732\_1109\_486\_02.raw

ITMS + p ESI E Full ms5 1236.00@cid35.00 1733.40@cid35.00 1110.00@cid35.00 487.00@cid35.00  
[130.00-500.00]

Scan #: 1-100

RT: 0.00-46.04

AV: 100

| m/z | Intensity | Relative |
|-----|-----------|----------|
|-----|-----------|----------|

|        |     |        |
|--------|-----|--------|
| 179.96 | 0.0 | 0.34   |
| 187.10 | 0.0 | 0.48   |
| 197.14 | 0.0 | 0.66   |
| 208.08 | 0.0 | 1.50   |
| 208.24 | 0.0 | 0.33   |
| 220.03 | 0.0 | 3.73   |
| 221.16 | 0.0 | 0.76   |
| 227.15 | 0.0 | 0.44   |
| 235.53 | 0.0 | 0.68   |
| 235.98 | 0.0 | 0.77   |
| 241.08 | 0.0 | 7.57   |
| 242.05 | 0.0 | 0.84   |
| 245.03 | 0.0 | 0.42   |
| 250.10 | 0.0 | 1.89   |
| 251.58 | 0.0 | 0.73   |
| 252.10 | 0.0 | 2.63   |
| 257.06 | 0.0 | 0.78   |
| 259.11 | 0.2 | 46.06  |
| 259.47 | 0.0 | 0.50   |
| 259.97 | 0.0 | 1.05   |
| 260.20 | 0.0 | 1.77   |
| 268.11 | 0.1 | 16.17  |
| 269.15 | 0.0 | 2.00   |
| 286.45 | 0.0 | 0.91   |
| 297.15 | 0.0 | 0.64   |
| 301.04 | 0.0 | 0.98   |
| 329.16 | 0.1 | 43.28  |
| 330.04 | 0.0 | 0.62   |
| 330.25 | 0.0 | 1.42   |
| 366.21 | 0.0 | 1.76   |
| 371.17 | 0.0 | 0.59   |
| 377.76 | 0.0 | 0.59   |
| 384.19 | 0.0 | 0.70   |
| 394.03 | 0.0 | 0.51   |
| 412.18 | 0.1 | 31.77  |
| 413.13 | 0.0 | 1.74   |
| 413.28 | 0.0 | 2.28   |
| 415.10 | 0.0 | 0.54   |
| 415.35 | 0.0 | 0.72   |
| 418.35 | 0.0 | 0.96   |
| 431.23 | 0.0 | 1.00   |
| 440.10 | 0.0 | 0.44   |
| 444.25 | 0.3 | 100.00 |

|        |     |       |
|--------|-----|-------|
| 445.26 | 0.0 | 11.41 |
| 454.08 | 0.0 | 0.35  |
| 454.32 | 0.0 | 1.30  |
| 456.31 | 0.0 | 3.87  |
| 468.60 | 0.0 | 0.73  |
| 486.26 | 0.1 | 17.38 |
| 487.30 | 0.0 | 1.49  |

SPECTRUM - MS

12-18-13\_HMG54\_1235\_MS5\_1732\_1109\_646\_01.raw

ITMS + p ESI E Full ms5 1236.00@cid35.00 1733.40@cid35.00 1110.00@cid35.00 647.00@cid35.00  
[175.00-700.00]

Scan #: 1-50

RT: 0.00-11.33

AV: 50

| m/z | Intensity | Relative |
|-----|-----------|----------|
|-----|-----------|----------|

|        |     |        |
|--------|-----|--------|
| 194.01 | 0.0 | 0.96   |
| 204.00 | 0.0 | 3.13   |
| 218.07 | 0.0 | 0.90   |
| 220.08 | 0.0 | 1.24   |
| 227.04 | 0.1 | 8.70   |
| 229.08 | 0.1 | 4.66   |
| 236.06 | 0.1 | 7.71   |
| 245.10 | 0.3 | 25.35  |
| 246.04 | 0.0 | 0.78   |
| 287.08 | 0.0 | 2.09   |
| 287.27 | 0.0 | 0.91   |
| 315.05 | 0.0 | 1.77   |
| 315.24 | 0.0 | 1.69   |
| 324.22 | 0.0 | 0.93   |
| 343.15 | 0.1 | 5.17   |
| 353.15 | 0.0 | 1.01   |
| 366.20 | 0.0 | 1.66   |
| 366.98 | 0.0 | 0.99   |
| 367.11 | 0.0 | 1.00   |
| 368.18 | 0.0 | 0.79   |
| 369.18 | 0.0 | 2.54   |
| 371.30 | 0.0 | 0.77   |
| 378.21 | 0.0 | 1.78   |
| 380.17 | 0.0 | 2.95   |
| 382.22 | 0.1 | 7.92   |
| 384.19 | 0.1 | 8.05   |
| 385.17 | 1.3 | 100.00 |
| 386.17 | 0.1 | 9.82   |
| 397.04 | 0.0 | 0.78   |
| 397.26 | 0.0 | 0.87   |
| 398.23 | 0.0 | 2.46   |
| 424.27 | 0.1 | 4.43   |
| 433.12 | 0.0 | 1.06   |
| 440.18 | 0.3 | 21.62  |

|        |     |       |
|--------|-----|-------|
| 441.22 | 0.0 | 1.66  |
| 442.21 | 0.2 | 17.71 |
| 443.30 | 0.0 | 1.39  |
| 458.22 | 0.2 | 11.77 |
| 530.21 | 0.0 | 0.84  |
| 542.43 | 0.0 | 1.05  |
| 545.47 | 0.0 | 0.75  |
| 572.29 | 0.8 | 65.75 |
| 572.83 | 0.0 | 0.74  |
| 573.31 | 0.3 | 23.60 |
| 574.29 | 0.0 | 0.78  |
| 575.32 | 0.3 | 26.07 |
| 576.28 | 0.0 | 2.59  |
| 604.31 | 0.1 | 6.64  |
| 646.31 | 0.3 | 25.58 |
| 647.40 | 0.0 | 2.86  |

SPECTRUM - MS

1-16-14\_HMG54\_1235\_MS4\_1732\_646\_02.raw

ITMS + p ESI E Full ms4 1236.00@cid35.00 1733.40@cid35.00 647.00@cid35.00 [175.00-700.00]

Scan #: 1-100

RT: 0.00-15.06

AV: 100

m/z Intensity Relative

|        |     |       |
|--------|-----|-------|
| 204.10 | 0.1 | 1.40  |
| 211.15 | 0.1 | 0.95  |
| 218.09 | 0.1 | 1.19  |
| 220.04 | 0.1 | 2.06  |
| 227.07 | 0.7 | 13.42 |
| 229.09 | 0.3 | 5.32  |
| 236.17 | 0.3 | 5.73  |
| 245.11 | 1.7 | 30.32 |
| 246.14 | 0.1 | 1.31  |
| 287.18 | 0.1 | 2.21  |
| 315.30 | 0.1 | 1.44  |
| 324.15 | 0.1 | 1.41  |
| 336.31 | 0.1 | 0.96  |
| 343.15 | 0.2 | 4.08  |
| 366.18 | 0.2 | 3.99  |
| 367.21 | 0.2 | 2.91  |
| 368.20 | 0.2 | 3.16  |
| 368.37 | 0.1 | 0.92  |
| 369.16 | 0.1 | 1.05  |
| 369.33 | 0.1 | 1.06  |
| 371.24 | 0.1 | 0.98  |
| 378.24 | 0.1 | 1.69  |
| 380.08 | 0.1 | 1.57  |
| 380.28 | 0.2 | 3.18  |
| 382.18 | 0.2 | 4.53  |
| 382.34 | 0.2 | 3.01  |

|        |     |        |
|--------|-----|--------|
| 383.26 | 0.1 | 2.31   |
| 384.21 | 0.6 | 10.40  |
| 385.21 | 5.5 | 100.00 |
| 386.21 | 0.7 | 12.99  |
| 398.29 | 0.1 | 1.76   |
| 424.24 | 0.3 | 6.36   |
| 440.25 | 1.1 | 20.86  |
| 441.22 | 0.1 | 1.88   |
| 442.25 | 1.2 | 21.82  |
| 443.27 | 0.2 | 4.05   |
| 458.22 | 0.3 | 5.80   |
| 458.39 | 0.2 | 3.70   |
| 459.29 | 0.1 | 1.54   |
| 498.19 | 0.1 | 1.11   |
| 542.35 | 0.1 | 0.98   |
| 572.33 | 4.2 | 77.12  |
| 573.33 | 1.5 | 26.86  |
| 574.29 | 0.3 | 5.18   |
| 574.49 | 0.1 | 1.30   |
| 575.37 | 1.7 | 31.30  |
| 576.41 | 0.3 | 5.63   |
| 604.37 | 0.2 | 4.31   |
| 646.38 | 0.6 | 11.57  |
| 647.42 | 0.1 | 1.26   |

SPECTRUM - MS

12-18-13\_HMG54\_1235\_MS3\_660\_01.raw

ITMS + p ESI E Full ms3 1236.00@cid35.00 661.00@cid35.00 [180.00-700.00]

Scan #: 1-50

RT: 0.00-6.22

AV: 50

m/z Intensity Relative

|        |      |       |
|--------|------|-------|
| 211.07 | 2.3  | 0.95  |
| 229.07 | 10.0 | 4.16  |
| 236.03 | 4.6  | 1.89  |
| 241.07 | 6.3  | 2.60  |
| 257.06 | 2.5  | 1.02  |
| 259.11 | 72.4 | 29.98 |
| 260.10 | 7.3  | 3.02  |
| 301.11 | 3.7  | 1.53  |
| 329.16 | 7.5  | 3.12  |
| 355.17 | 3.2  | 1.31  |
| 380.16 | 5.9  | 2.44  |
| 382.20 | 11.5 | 4.75  |
| 383.19 | 4.5  | 1.88  |
| 384.21 | 5.9  | 2.44  |
| 385.19 | 3.6  | 1.48  |
| 394.20 | 6.9  | 2.87  |
| 398.18 | 10.3 | 4.28  |
| 399.18 | 6.2  | 2.57  |

|        |       |        |
|--------|-------|--------|
| 412.17 | 5.2   | 2.17   |
| 424.20 | 6.6   | 2.72   |
| 430.23 | 16.3  | 6.75   |
| 431.24 | 3.0   | 1.23   |
| 442.22 | 6.6   | 2.74   |
| 447.24 | 7.1   | 2.94   |
| 454.19 | 13.9  | 5.75   |
| 455.21 | 2.5   | 1.03   |
| 456.21 | 28.8  | 11.94  |
| 457.22 | 5.3   | 2.19   |
| 470.21 | 4.4   | 1.83   |
| 472.25 | 241.4 | 100.00 |
| 473.25 | 50.5  | 20.94  |
| 474.23 | 7.4   | 3.06   |
| 486.27 | 8.9   | 3.69   |
| 515.26 | 2.7   | 1.12   |
| 556.28 | 2.3   | 0.94   |
| 562.30 | 5.7   | 2.34   |
| 584.23 | 9.9   | 4.09   |
| 586.28 | 86.9  | 35.99  |
| 587.27 | 24.3  | 10.08  |
| 588.29 | 5.0   | 2.07   |
| 589.30 | 29.7  | 12.32  |
| 590.31 | 10.0  | 4.15   |
| 614.27 | 8.3   | 3.42   |
| 618.32 | 138.7 | 57.46  |
| 619.33 | 39.7  | 16.44  |
| 620.34 | 7.1   | 2.94   |
| 630.30 | 5.2   | 2.15   |
| 660.33 | 51.5  | 21.34  |
| 661.34 | 15.1  | 6.24   |
| 662.34 | 3.4   | 1.39   |

SPECTRUM - MS

1-16-14\_HMG54\_1235\_MS3\_917\_01.raw

ITMS + p ESI E Full ms3 1236.00@cid35.00 918.00@cid35.00 [250.00-2000.00]

Scan #: 1-20

RT: 0.00-1.76

AV: 20

m/z Intensity Relative

|        |       |       |
|--------|-------|-------|
| 444.30 | 13.7  | 0.63  |
| 486.30 | 447.5 | 20.78 |
| 487.28 | 95.9  | 4.45  |
| 488.32 | 10.6  | 0.49  |
| 514.33 | 20.2  | 0.94  |
| 534.39 | 44.3  | 2.06  |
| 535.33 | 12.5  | 0.58  |
| 582.34 | 57.3  | 2.66  |
| 582.90 | 22.7  | 1.05  |
| 583.33 | 13.8  | 0.64  |

|         |        |       |        |
|---------|--------|-------|--------|
| 616.32  | 28.1   | 1.31  |        |
| 646.33  | 49.0   | 2.28  |        |
| 685.41  | 2153.5 |       | 100.00 |
| 685.92  | 1407.9 |       | 65.38  |
| 686.41  | 497.0  | 23.08 |        |
| 686.90  | 80.8   | 3.75  |        |
| 687.30  | 10.7   | 0.50  |        |
| 704.36  | 62.8   | 2.92  |        |
| 705.28  | 10.0   | 0.47  |        |
| 706.34  | 16.4   | 0.76  |        |
| 706.51  | 12.6   | 0.59  |        |
| 724.43  | 406.0  | 18.85 |        |
| 725.43  | 139.0  | 6.46  |        |
| 726.44  | 20.8   | 0.97  |        |
| 746.36  | 48.1   | 2.23  |        |
| 794.53  | 11.6   | 0.54  |        |
| 807.97  | 14.8   | 0.69  |        |
| 813.95  | 83.0   | 3.85  |        |
| 814.47  | 66.4   | 3.08  |        |
| 814.95  | 36.6   | 1.70  |        |
| 822.94  | 50.9   | 2.36  |        |
| 823.46  | 51.9   | 2.41  |        |
| 901.87  | 11.6   | 0.54  |        |
| 902.03  | 11.0   | 0.51  |        |
| 902.48  | 9.9    | 0.46  |        |
| 917.01  | 304.3  | 14.13 |        |
| 917.49  | 270.3  | 12.55 |        |
| 918.01  | 132.7  | 6.16  |        |
| 918.53  | 37.2   | 1.73  |        |
| 1109.54 |        | 121.9 | 5.66   |
| 1110.56 |        | 58.7  | 2.72   |
| 1141.62 |        | 59.7  | 2.77   |
| 1142.58 |        | 30.6  | 1.42   |
| 1143.60 |        | 19.0  | 0.88   |
| 1143.77 |        | 17.8  | 0.83   |
| 1144.65 |        | 10.1  | 0.47   |
| 1347.68 |        | 571.0 | 26.51  |
| 1348.70 |        | 347.3 | 16.13  |
| 1349.72 |        | 112.6 | 5.23   |
| 1350.67 |        | 13.8  | 0.64   |

SPECTRUM - MS

1-16-14\_HMG54\_1235\_MS4\_917\_1109\_01.raw

ITMS + p ESI E Full ms4 1236.00@cid35.00 918.00@cid35.00 1110.00@cid35.00 [305.00-1200.00]

Scan #: 1-20

RT: 0.00-1.50

AV: 20

m/z Intensity Relative

|        |     |      |
|--------|-----|------|
| 364.16 | 0.2 | 0.48 |
| 384.29 | 0.2 | 0.41 |

|         |      |        |       |
|---------|------|--------|-------|
| 385.19  | 1.7  | 3.68   |       |
| 412.19  | 0.2  | 0.53   |       |
| 424.19  | 0.3  | 0.56   |       |
| 442.23  | 0.2  | 0.46   |       |
| 458.11  | 0.2  | 0.52   |       |
| 458.35  | 0.5  | 1.05   |       |
| 486.30  | 11.1 | 23.74  |       |
| 487.06  | 0.2  | 0.51   |       |
| 487.29  | 0.7  | 1.41   |       |
| 487.44  | 0.6  | 1.38   |       |
| 488.10  | 0.3  | 0.54   |       |
| 572.30  | 1.0  | 2.04   |       |
| 573.23  | 0.6  | 1.34   |       |
| 575.37  | 0.4  | 0.82   |       |
| 604.33  | 0.2  | 0.46   |       |
| 614.23  | 0.3  | 0.56   |       |
| 646.35  | 46.7 | 100.00 |       |
| 647.38  | 9.1  | 19.46  |       |
| 648.44  | 0.3  | 0.63   |       |
| 675.07  | 0.2  | 0.41   |       |
| 690.13  | 0.4  | 0.83   |       |
| 708.44  | 1.4  | 3.06   |       |
| 709.23  | 0.3  | 0.57   |       |
| 709.42  | 0.2  | 0.50   |       |
| 799.40  | 0.2  | 0.42   |       |
| 802.59  | 0.2  | 0.43   |       |
| 848.33  | 0.3  | 0.59   |       |
| 891.62  | 0.6  | 1.19   |       |
| 892.46  | 0.4  | 0.89   |       |
| 905.43  | 0.6  | 1.18   |       |
| 906.51  | 0.2  | 0.48   |       |
| 922.35  | 0.2  | 0.49   |       |
| 926.79  | 0.2  | 0.38   |       |
| 989.13  | 0.3  | 0.73   |       |
| 990.44  | 0.3  | 0.54   |       |
| 1003.40 |      | 0.3    | 0.59  |
| 1036.59 |      | 0.3    | 0.65  |
| 1067.73 |      | 0.2    | 0.44  |
| 1068.57 |      | 0.3    | 0.66  |
| 1077.50 |      | 0.2    | 0.53  |
| 1078.43 |      | 0.3    | 0.71  |
| 1079.59 |      | 1.2    | 2.51  |
| 1080.57 |      | 0.6    | 1.30  |
| 1109.59 |      | 7.4    | 15.93 |
| 1110.56 |      | 4.3    | 9.24  |
| 1110.85 |      | 0.3    | 0.61  |
| 1111.42 |      | 0.3    | 0.68  |
| 1111.68 |      | 0.3    | 0.69  |

SPECTRUM - MS

1-16-14\_HMG54\_1235\_MS5\_917\_1109\_486\_03.raw



ITMS + p ESI E Full ms5 1236.00@cid35.00 918.00@cid35.00 1110.00@cid35.00 487.00@cid35.00  
[130.00-500.00]

Scan #: 1-106

RT: 0.00-17.45

AV: 106

| m/z    | Intensity | Relative |
|--------|-----------|----------|
| 151.58 | 0.0       | 0.81     |
| 179.90 | 0.0       | 1.00     |
| 187.15 | 0.0       | 0.71     |
| 204.05 | 0.0       | 0.61     |
| 211.19 | 0.0       | 1.21     |
| 219.98 | 0.0       | 2.26     |
| 220.13 | 0.0       | 3.79     |
| 229.21 | 0.0       | 0.56     |
| 229.81 | 0.0       | 0.58     |
| 241.04 | 0.0       | 4.89     |
| 251.35 | 0.0       | 1.48     |
| 254.42 | 0.0       | 0.64     |
| 258.69 | 0.0       | 0.52     |
| 259.13 | 0.2       | 24.02    |
| 260.06 | 0.0       | 0.85     |
| 268.14 | 0.1       | 16.80    |
| 269.09 | 0.0       | 1.85     |
| 278.14 | 0.0       | 0.86     |
| 293.24 | 0.0       | 0.63     |
| 301.03 | 0.0       | 0.95     |
| 315.29 | 0.0       | 0.81     |
| 329.18 | 0.3       | 50.21    |
| 329.55 | 0.0       | 1.38     |
| 330.12 | 0.0       | 4.02     |
| 330.28 | 0.0       | 5.24     |
| 331.34 | 0.0       | 1.12     |
| 338.90 | 0.0       | 1.07     |
| 353.08 | 0.0       | 0.53     |
| 362.08 | 0.0       | 1.19     |
| 390.28 | 0.0       | 1.79     |
| 394.16 | 0.0       | 0.57     |
| 410.31 | 0.0       | 0.77     |
| 412.24 | 0.0       | 0.87     |
| 415.23 | 0.0       | 5.40     |
| 424.39 | 0.0       | 1.09     |
| 426.57 | 0.0       | 0.58     |
| 431.21 | 0.0       | 1.05     |
| 434.95 | 0.0       | 0.65     |
| 444.30 | 0.7       | 100.00   |
| 445.34 | 0.1       | 14.91    |
| 446.29 | 0.0       | 0.73     |
| 448.03 | 0.0       | 0.65     |
| 454.31 | 0.0       | 1.32     |
| 455.15 | 0.0       | 0.67     |

|        |     |      |
|--------|-----|------|
| 456.22 | 0.0 | 7.22 |
| 456.37 | 0.0 | 2.37 |
| 486.24 | 0.0 | 6.01 |
| 486.38 | 0.0 | 4.34 |
| 488.38 | 0.0 | 1.02 |
| 489.50 | 0.0 | 0.71 |

SPECTRUM - MS

1-16-14\_HMG54\_1235\_MS5\_917\_1109\_646\_03.raw

ITMS + p ESI E Full ms5 1236.00@cid35.00 918.00@cid35.00 1110.00@cid35.00 647.00@cid35.00  
[175.00-700.00]

Scan #: 1-286

RT: 0.00-48.81

AV: 286

| m/z | Intensity | Relative |
|-----|-----------|----------|
|-----|-----------|----------|

|        |     |        |
|--------|-----|--------|
| 194.06 | 0.0 | 0.76   |
| 204.05 | 0.0 | 2.07   |
| 211.07 | 0.0 | 0.75   |
| 220.09 | 0.0 | 1.33   |
| 227.06 | 0.2 | 10.43  |
| 229.05 | 0.1 | 3.72   |
| 236.05 | 0.2 | 8.16   |
| 243.02 | 0.0 | 1.00   |
| 245.11 | 0.4 | 17.36  |
| 246.15 | 0.0 | 1.53   |
| 287.24 | 0.0 | 1.96   |
| 315.15 | 0.1 | 2.39   |
| 343.17 | 0.1 | 4.95   |
| 353.19 | 0.0 | 0.73   |
| 366.15 | 0.1 | 2.62   |
| 367.20 | 0.0 | 1.13   |
| 368.21 | 0.1 | 2.26   |
| 369.20 | 0.0 | 1.42   |
| 371.19 | 0.0 | 1.07   |
| 378.22 | 0.1 | 3.99   |
| 379.21 | 0.0 | 0.96   |
| 380.21 | 0.1 | 3.40   |
| 382.23 | 0.1 | 3.94   |
| 384.19 | 0.1 | 5.34   |
| 385.19 | 2.4 | 100.00 |
| 386.19 | 0.3 | 12.41  |
| 387.18 | 0.0 | 1.46   |
| 398.15 | 0.1 | 2.43   |
| 424.28 | 0.1 | 3.12   |
| 433.15 | 0.0 | 0.90   |
| 433.32 | 0.0 | 0.91   |
| 440.19 | 0.4 | 15.44  |
| 441.22 | 0.1 | 3.60   |
| 442.23 | 0.3 | 10.86  |
| 458.28 | 0.2 | 7.86   |

|        |     |       |
|--------|-----|-------|
| 459.29 | 0.0 | 0.77  |
| 498.26 | 0.0 | 0.77  |
| 530.39 | 0.0 | 0.76  |
| 572.30 | 1.2 | 50.97 |
| 573.31 | 0.6 | 23.76 |
| 574.26 | 0.1 | 2.82  |
| 574.44 | 0.0 | 2.07  |
| 575.34 | 0.8 | 32.43 |
| 576.31 | 0.2 | 7.57  |
| 577.22 | 0.0 | 0.73  |
| 604.34 | 0.2 | 6.57  |
| 605.31 | 0.0 | 1.57  |
| 646.38 | 0.2 | 7.86  |
| 647.24 | 0.0 | 1.56  |
| 647.50 | 0.0 | 1.08  |

HMG 55 Mass spectral peak lists

SPECTRUM - MS

7-22-13\_HMG55\_1236\_MS2\_01.raw

ITMS + p ESI E Full ms2 1236.10@cid35.00 [340.00-2000.00]

Scan #: 1-20

RT: 0.00-3.69

AV: 20

| m/z     | Intensity | Relative |
|---------|-----------|----------|
| 486.28  | 149.1     | 8.94     |
| 646.36  | 58.2      | 3.49     |
| 660.38  | 387.0     | 23.20    |
| 661.39  | 108.9     | 6.53     |
| 685.40  | 160.0     | 9.59     |
| 685.91  | 107.2     | 6.43     |
| 692.41  | 88.7      | 5.32     |
| 692.92  | 58.7      | 3.52     |
| 724.45  | 86.9      | 5.21     |
| 885.99  | 79.6      | 4.77     |
| 886.51  | 69.0      | 4.13     |
| 901.02  | 62.0      | 3.72     |
| 901.51  | 56.2      | 3.37     |
| 917.03  | 437.3     | 26.22    |
| 917.53  | 378.2     | 22.68    |
| 918.03  | 159.9     | 9.59     |
| 918.54  | 46.0      | 2.76     |
| 1004.09 | 1667.8    | 100.00   |
| 1004.58 | 1549.3    | 92.89    |
| 1005.09 | 778.8     | 46.70    |
| 1005.57 | 227.1     | 13.61    |
| 1080.59 | 67.9      | 4.07     |
| 1081.08 | 64.5      | 3.87     |
| 1109.56 | 106.7     | 6.40     |
| 1110.57 | 51.4      | 3.08     |
| 1117.63 | 679.0     | 40.71    |
| 1118.13 | 713.2     | 42.76    |
| 1118.63 | 405.5     | 24.31    |
| 1119.14 | 147.6     | 8.85     |
| 1132.61 | 123.8     | 7.42     |
| 1133.10 | 125.5     | 7.52     |
| 1133.61 | 76.5      | 4.59     |
| 1141.62 | 67.9      | 4.07     |
| 1142.11 | 62.1      | 3.72     |
| 1142.62 | 42.5      | 2.55     |
| 1235.69 | 598.3     | 35.87    |
| 1236.18 | 754.8     | 45.25    |
| 1236.66 | 524.8     | 31.46    |
| 1237.16 | 230.3     | 13.81    |
| 1347.73 | 209.4     | 12.55    |
| 1348.74 | 132.2     | 7.92     |

|         |       |       |
|---------|-------|-------|
| 1349.74 | 43.3  | 2.60  |
| 1361.72 | 176.2 | 10.57 |
| 1362.73 | 105.2 | 6.31  |
| 1811.06 | 336.8 | 20.19 |
| 1812.06 | 276.9 | 16.60 |
| 1813.07 | 130.6 | 7.83  |
| 1985.27 | 208.8 | 12.52 |
| 1986.28 | 199.4 | 11.96 |
| 1987.28 | 94.0  | 5.64  |

SPECTRUM - MS

7-22-13\_HMG55\_1236\_MS3\_1109\_01.raw

ITMS + p ESI E Full ms3 1236.10@cid35.00 1110.00@cid35.00 [305.00-1200.00]

Scan #: 1-20

RT: 0.00-3.44

AV: 20

m/z Intensity Relative

|        |      |        |
|--------|------|--------|
| 385.19 | 2.5  | 3.44   |
| 386.17 | 0.3  | 0.45   |
| 398.19 | 0.5  | 0.69   |
| 412.25 | 0.7  | 0.97   |
| 440.21 | 0.5  | 0.72   |
| 442.20 | 0.4  | 0.55   |
| 454.26 | 0.3  | 0.42   |
| 458.27 | 0.3  | 0.44   |
| 472.27 | 0.4  | 0.52   |
| 486.26 | 13.7 | 18.67  |
| 487.28 | 2.3  | 3.09   |
| 572.30 | 1.4  | 1.89   |
| 573.22 | 0.5  | 0.62   |
| 573.41 | 0.4  | 0.57   |
| 575.32 | 1.1  | 1.49   |
| 598.29 | 1.2  | 1.68   |
| 599.32 | 0.5  | 0.66   |
| 646.34 | 73.3 | 100.00 |
| 647.36 | 17.2 | 23.41  |
| 648.35 | 2.4  | 3.31   |
| 660.38 | 0.3  | 0.43   |
| 690.40 | 0.8  | 1.03   |
| 708.36 | 4.7  | 6.34   |
| 709.38 | 0.8  | 1.05   |
| 778.37 | 0.4  | 0.50   |
| 780.48 | 0.6  | 0.81   |
| 782.54 | 1.1  | 1.56   |
| 784.45 | 2.5  | 3.35   |
| 786.44 | 0.5  | 0.73   |
| 799.41 | 5.4  | 7.41   |
| 800.41 | 1.9  | 2.56   |
| 872.39 | 0.4  | 0.57   |
| 873.46 | 39.2 | 53.48  |

|         |      |       |       |
|---------|------|-------|-------|
| 874.46  | 16.2 | 22.15 |       |
| 875.47  | 2.5  | 3.41  |       |
| 876.37  | 1.0  | 1.33  |       |
| 891.43  | 0.4  | 0.52  |       |
| 903.41  | 0.6  | 0.76  |       |
| 905.43  | 1.6  | 2.14  |       |
| 921.47  | 0.7  | 0.94  |       |
| 958.23  | 1.6  | 2.17  |       |
| 960.25  | 0.5  | 0.67  |       |
| 1035.51 |      | 0.7   | 0.92  |
| 1050.27 |      | 0.4   | 0.54  |
| 1067.53 |      | 1.1   | 1.56  |
| 1079.58 |      | 0.3   | 0.44  |
| 1108.26 |      | 1.9   | 2.60  |
| 1109.56 |      | 15.4  | 20.99 |
| 1110.54 |      | 9.1   | 12.41 |
| 1111.60 |      | 2.3   | 3.17  |

SPECTRUM - MS

7-22-13\_HMG55\_1236\_MS4\_1109\_486\_02.raw

ITMS + p ESI E Full ms4 1236.10@cid35.00 1110.00@cid35.00 487.00@cid35.00 [130.00-500.00]

Scan #: 1-50

RT: 0.00-9.67

AV: 50

| m/z    | Intensity | Relative |
|--------|-----------|----------|
| 149.01 | 0.0       | 0.74     |
| 154.01 | 0.0       | 0.88     |
| 178.01 | 0.0       | 1.37     |
| 208.08 | 0.0       | 4.22     |
| 211.10 | 0.0       | 0.84     |
| 218.00 | 0.0       | 0.60     |
| 220.03 | 0.0       | 2.08     |
| 221.05 | 0.0       | 0.90     |
| 241.04 | 0.0       | 2.58     |
| 241.19 | 0.0       | 1.75     |
| 248.06 | 0.0       | 0.60     |
| 250.15 | 0.1       | 6.36     |
| 252.03 | 0.1       | 8.15     |
| 252.18 | 0.1       | 5.21     |
| 252.97 | 0.0       | 0.67     |
| 257.12 | 0.0       | 1.29     |
| 257.26 | 0.0       | 0.76     |
| 259.10 | 1.1       | 97.07    |
| 260.08 | 0.1       | 5.59     |
| 260.22 | 0.0       | 4.09     |
| 268.15 | 0.1       | 10.41    |
| 268.99 | 0.0       | 1.70     |
| 273.99 | 0.0       | 0.64     |
| 297.15 | 0.0       | 0.60     |
| 301.16 | 0.0       | 1.85     |

|        |     |        |
|--------|-----|--------|
| 325.79 | 0.0 | 1.06   |
| 326.12 | 0.0 | 0.71   |
| 329.18 | 0.3 | 29.27  |
| 330.19 | 0.0 | 3.44   |
| 336.13 | 0.0 | 0.69   |
| 352.24 | 0.0 | 1.08   |
| 382.30 | 0.0 | 0.61   |
| 383.86 | 0.0 | 0.77   |
| 384.13 | 0.0 | 2.01   |
| 384.46 | 0.0 | 0.62   |
| 412.22 | 1.2 | 100.00 |
| 413.23 | 0.1 | 11.19  |
| 414.20 | 0.0 | 0.66   |
| 415.13 | 0.0 | 1.49   |
| 415.29 | 0.0 | 2.57   |
| 416.12 | 0.0 | 0.69   |
| 430.92 | 0.0 | 0.65   |
| 444.26 | 1.0 | 82.59  |
| 445.12 | 0.1 | 7.19   |
| 445.31 | 0.1 | 11.19  |
| 454.32 | 0.0 | 0.94   |
| 456.29 | 0.0 | 1.15   |
| 484.16 | 0.0 | 0.66   |
| 486.30 | 0.4 | 32.36  |
| 487.46 | 0.0 | 2.46   |

SPECTRUM - MS

7-22-13\_HMG55\_1236\_MS4\_1109\_646\_01.raw

ITMS + p ESI E Full ms4 1236.10@cid35.00 1110.00@cid35.00 647.00@cid35.00 [175.00-700.00]

Scan #: 1-50

RT: 0.00-9.68

AV: 50

m/z Intensity Relative

|        |     |       |
|--------|-----|-------|
| 194.02 | 0.1 | 1.09  |
| 203.99 | 0.2 | 1.74  |
| 211.06 | 0.1 | 0.96  |
| 220.08 | 0.1 | 1.05  |
| 227.08 | 1.0 | 11.25 |
| 228.12 | 0.1 | 0.63  |
| 229.10 | 0.4 | 4.38  |
| 236.07 | 0.6 | 7.00  |
| 245.08 | 1.8 | 19.20 |
| 246.08 | 0.1 | 1.26  |
| 287.12 | 0.1 | 1.60  |
| 292.05 | 0.1 | 0.63  |
| 315.14 | 0.2 | 2.52  |
| 343.16 | 0.4 | 4.67  |
| 366.17 | 0.3 | 2.81  |
| 367.19 | 0.2 | 1.73  |
| 368.19 | 0.2 | 2.36  |

|        |     |        |
|--------|-----|--------|
| 369.27 | 0.1 | 0.71   |
| 371.18 | 0.1 | 1.35   |
| 378.19 | 0.4 | 3.91   |
| 379.17 | 0.1 | 0.60   |
| 380.19 | 0.3 | 3.71   |
| 381.17 | 0.1 | 0.75   |
| 382.21 | 0.5 | 5.45   |
| 383.21 | 0.1 | 1.16   |
| 384.17 | 0.5 | 5.50   |
| 385.17 | 9.2 | 100.00 |
| 386.19 | 1.0 | 10.42  |
| 396.30 | 0.1 | 0.81   |
| 398.23 | 0.1 | 1.15   |
| 408.26 | 0.1 | 0.78   |
| 424.19 | 0.5 | 5.54   |
| 433.34 | 0.1 | 0.77   |
| 440.21 | 1.7 | 18.37  |
| 441.23 | 0.3 | 3.33   |
| 442.23 | 1.3 | 13.76  |
| 443.28 | 0.1 | 1.15   |
| 458.22 | 0.8 | 8.28   |
| 459.18 | 0.1 | 1.14   |
| 498.19 | 0.1 | 0.76   |
| 530.24 | 0.1 | 0.68   |
| 572.29 | 5.4 | 58.66  |
| 573.30 | 2.1 | 22.38  |
| 574.31 | 0.2 | 2.60   |
| 575.32 | 2.8 | 30.80  |
| 576.34 | 0.6 | 6.10   |
| 604.34 | 0.6 | 6.83   |
| 605.37 | 0.1 | 0.96   |
| 646.32 | 1.5 | 16.12  |
| 647.34 | 0.4 | 3.99   |

SPECTRUM - MS

7-22-13\_HMG55\_1236\_MS3\_660\_01.raw

ITMS + p ESI E Full ms3 1236.10@cid35.00 661.00@cid35.00 [180.00-700.00]

Scan #: 1-50

RT: 0.00-11.58

AV: 50

m/z Intensity Relative

|        |      |        |
|--------|------|--------|
| 229.11 | 1.7  | 6.93   |
| 236.07 | 1.0  | 3.89   |
| 241.10 | 0.9  | 3.77   |
| 259.11 | 24.6 | 100.00 |
| 260.12 | 2.1  | 8.35   |
| 287.12 | 0.4  | 1.69   |
| 301.14 | 0.4  | 1.47   |
| 325.17 | 0.3  | 1.42   |
| 338.20 | 0.4  | 1.68   |



|        |      |       |
|--------|------|-------|
| 350.19 | 0.3  | 1.39  |
| 364.19 | 1.0  | 4.18  |
| 368.19 | 0.4  | 1.44  |
| 369.21 | 0.4  | 1.45  |
| 382.22 | 0.8  | 3.06  |
| 398.21 | 0.6  | 2.34  |
| 400.23 | 0.7  | 2.71  |
| 412.23 | 1.3  | 5.45  |
| 424.20 | 2.1  | 8.55  |
| 426.22 | 2.0  | 8.05  |
| 430.25 | 0.6  | 2.38  |
| 440.20 | 0.4  | 1.78  |
| 442.26 | 8.3  | 33.63 |
| 443.26 | 1.4  | 5.78  |
| 447.26 | 0.5  | 1.99  |
| 454.23 | 1.2  | 4.79  |
| 456.25 | 1.2  | 4.95  |
| 472.24 | 11.4 | 46.07 |
| 473.24 | 2.1  | 8.57  |
| 486.26 | 1.1  | 4.39  |
| 515.29 | 0.9  | 3.70  |
| 540.25 | 0.5  | 1.96  |
| 554.31 | 0.4  | 1.65  |
| 556.33 | 0.7  | 2.76  |
| 562.33 | 0.8  | 3.19  |
| 570.30 | 0.6  | 2.45  |
| 584.29 | 1.0  | 3.87  |
| 586.31 | 15.2 | 61.72 |
| 587.32 | 3.9  | 15.97 |
| 589.33 | 6.7  | 27.26 |
| 590.35 | 1.6  | 6.62  |
| 597.36 | 0.9  | 3.45  |
| 597.84 | 0.3  | 1.41  |
| 614.32 | 3.0  | 12.00 |
| 615.32 | 0.8  | 3.05  |
| 618.35 | 19.2 | 77.76 |
| 619.36 | 4.8  | 19.37 |
| 624.36 | 0.5  | 1.85  |
| 630.34 | 0.7  | 2.79  |
| 660.38 | 9.6  | 38.81 |
| 661.40 | 1.9  | 7.91  |

HMG 56 Mass spectral peak lists

SPECTRUM - MS

6-27-13\_HMG56\_1235\_MS2\_01.raw

ITMS + p ESI E Full ms2 1236.00@cid35.00 [340.00-2000.00]

Scan #: 1-20

RT: 0.00-1.68

AV: 20

| m/z     | Intensity | Relative |
|---------|-----------|----------|
| 433.28  | 426.4     | 11.58    |
| 486.31  | 391.3     | 10.63    |
| 646.41  | 145.0     | 3.94     |
| 660.42  | 1624.8    | 44.15    |
| 661.43  | 442.8     | 12.03    |
| 685.45  | 465.5     | 12.65    |
| 685.96  | 296.2     | 8.05     |
| 692.46  | 133.2     | 3.62     |
| 724.49  | 279.1     | 7.58     |
| 799.01  | 344.4     | 9.36     |
| 799.52  | 246.5     | 6.70     |
| 901.07  | 137.7     | 3.74     |
| 917.10  | 1314.4    | 35.71    |
| 917.59  | 1070.6    | 29.09    |
| 918.09  | 459.5     | 12.48    |
| 1004.15 | 3680.6    | 100.00   |
| 1004.65 | 3443.7    | 93.56    |
| 1005.15 | 1688.1    | 45.87    |
| 1005.66 | 287.2     | 7.80     |
| 1030.66 | 1100.6    | 29.90    |
| 1031.15 | 1021.1    | 27.74    |
| 1031.65 | 518.0     | 14.07    |
| 1109.64 | 317.6     | 8.63     |
| 1110.64 | 142.1     | 3.86     |
| 1117.70 | 1031.0    | 28.01    |
| 1118.20 | 1082.2    | 29.40    |
| 1118.70 | 633.2     | 17.20    |
| 1132.69 | 357.8     | 9.72     |
| 1133.18 | 399.4     | 10.85    |
| 1133.68 | 238.4     | 6.48     |
| 1141.69 | 167.1     | 4.54     |
| 1142.19 | 160.9     | 4.37     |
| 1235.24 | 139.8     | 3.80     |
| 1235.78 | 2186.0    | 59.39    |
| 1236.26 | 2741.5    | 74.49    |
| 1236.74 | 1798.0    | 48.85    |
| 1237.25 | 362.9     | 9.86     |
| 1347.82 | 865.9     | 23.53    |
| 1348.82 | 529.5     | 14.39    |
| 1349.82 | 156.0     | 4.24     |
| 1361.82 | 442.9     | 12.03    |

|         |        |       |
|---------|--------|-------|
| 1362.82 | 252.7  | 6.87  |
| 1574.96 | 462.3  | 12.56 |
| 1575.95 | 357.1  | 9.70  |
| 1811.18 | 1566.9 | 42.57 |
| 1812.19 | 1333.2 | 36.22 |
| 1813.19 | 575.5  | 15.64 |
| 1985.39 | 602.5  | 16.37 |
| 1986.41 | 541.1  | 14.70 |
| 1987.41 | 263.5  | 7.16  |

SPECTRUM - MS

6-27-13\_HMG56\_1235\_MS3\_1109\_01.raw

ITMS + p ESI E Full ms3 1236.00@cid35.00 1110.00@cid35.00 [305.00-1200.00]

Scan #: 1-50

RT: 0.00-4.82

AV: 50

m/z Intensity Relative

|        |      |        |
|--------|------|--------|
| 343.27 | 0.1  | 0.26   |
| 384.19 | 0.2  | 0.38   |
| 385.20 | 1.8  | 3.38   |
| 386.21 | 0.2  | 0.40   |
| 398.24 | 0.4  | 0.78   |
| 412.22 | 0.3  | 0.66   |
| 412.40 | 0.2  | 0.37   |
| 440.24 | 0.3  | 0.61   |
| 442.27 | 0.3  | 0.62   |
| 454.25 | 0.3  | 0.50   |
| 458.31 | 0.3  | 0.65   |
| 470.34 | 0.1  | 0.23   |
| 472.27 | 0.4  | 0.73   |
| 486.30 | 8.5  | 16.20  |
| 487.31 | 1.3  | 2.39   |
| 524.24 | 0.1  | 0.28   |
| 572.36 | 0.8  | 1.53   |
| 573.30 | 0.3  | 0.66   |
| 575.37 | 0.6  | 1.22   |
| 598.42 | 0.7  | 1.34   |
| 599.25 | 0.1  | 0.28   |
| 599.40 | 0.2  | 0.29   |
| 604.47 | 0.1  | 0.23   |
| 646.39 | 52.8 | 100.00 |
| 647.40 | 9.3  | 17.58  |
| 660.48 | 0.2  | 0.31   |
| 669.48 | 0.1  | 0.24   |
| 690.42 | 0.3  | 0.63   |
| 691.40 | 0.1  | 0.23   |
| 706.40 | 0.2  | 0.28   |
| 708.42 | 3.2  | 5.97   |
| 709.40 | 0.6  | 1.10   |
| 778.40 | 0.1  | 0.25   |

|         |      |       |      |
|---------|------|-------|------|
| 778.56  | 0.1  | 0.20  |      |
| 799.45  | 6.1  | 11.61 |      |
| 800.47  | 1.8  | 3.35  |      |
| 873.52  | 42.6 | 80.63 |      |
| 874.53  | 11.7 | 22.12 |      |
| 891.55  | 0.4  | 0.75  |      |
| 903.43  | 0.3  | 0.51  |      |
| 903.61  | 0.3  | 0.54  |      |
| 905.61  | 0.7  | 1.25  |      |
| 906.59  | 0.2  | 0.37  |      |
| 1035.50 |      | 0.2   | 0.37 |
| 1035.70 |      | 0.3   | 0.52 |
| 1038.57 |      | 0.2   | 0.30 |
| 1067.62 |      | 0.6   | 1.21 |
| 1068.63 |      | 0.3   | 0.60 |
| 1109.63 |      | 5.2   | 9.76 |
| 1110.63 |      | 2.1   | 3.93 |

SPECTRUM - MS

1-16-14\_HMG56\_1235\_MS4\_1109\_486\_02.raw

ITMS + p ESI E Full ms4 1236.00@cid35.00 1110.00@cid35.00 487.00@cid35.00 [130.00-500.00]

Scan #: 1-100

RT: 0.00-30.87

AV: 100

| m/z    | Intensity | Relative |
|--------|-----------|----------|
| 178.04 | 0.0       | 1.46     |
| 208.11 | 0.0       | 2.71     |
| 209.06 | 0.0       | 0.51     |
| 210.04 | 0.0       | 0.62     |
| 211.12 | 0.0       | 0.86     |
| 217.37 | 0.0       | 1.39     |
| 227.24 | 0.0       | 0.35     |
| 241.06 | 0.0       | 7.15     |
| 250.08 | 0.0       | 5.66     |
| 251.06 | 0.0       | 0.56     |
| 252.11 | 0.0       | 13.04    |
| 253.11 | 0.0       | 2.87     |
| 254.02 | 0.0       | 0.50     |
| 257.04 | 0.0       | 0.29     |
| 257.20 | 0.0       | 0.61     |
| 259.10 | 0.3       | 94.19    |
| 260.02 | 0.0       | 3.15     |
| 260.16 | 0.0       | 3.86     |
| 268.13 | 0.0       | 1.82     |
| 289.89 | 0.0       | 0.53     |
| 301.23 | 0.0       | 0.59     |
| 314.09 | 0.0       | 0.44     |
| 324.04 | 0.0       | 0.53     |
| 329.14 | 0.0       | 0.46     |
| 329.26 | 0.0       | 0.40     |

|        |     |        |
|--------|-----|--------|
| 330.02 | 0.0 | 0.43   |
| 338.13 | 0.0 | 0.26   |
| 339.06 | 0.0 | 0.45   |
| 341.04 | 0.0 | 0.48   |
| 362.03 | 0.0 | 0.34   |
| 366.92 | 0.0 | 0.36   |
| 367.23 | 0.0 | 0.79   |
| 368.29 | 0.0 | 0.35   |
| 370.26 | 0.0 | 0.40   |
| 383.97 | 0.0 | 0.79   |
| 384.25 | 0.0 | 2.10   |
| 391.38 | 0.0 | 1.09   |
| 395.08 | 0.0 | 0.48   |
| 408.37 | 0.0 | 0.50   |
| 412.18 | 0.3 | 100.00 |
| 413.21 | 0.0 | 12.82  |
| 415.21 | 0.0 | 1.95   |
| 432.15 | 0.0 | 0.54   |
| 444.26 | 0.1 | 29.95  |
| 445.12 | 0.0 | 2.81   |
| 445.28 | 0.0 | 2.96   |
| 454.24 | 0.0 | 0.38   |
| 456.37 | 0.0 | 0.36   |
| 486.22 | 0.0 | 7.39   |
| 487.24 | 0.0 | 2.13   |

SPECTRUM - MS

6-27-13\_HMG56\_1235\_MS4\_1109\_646\_01.raw

ITMS + p ESI E Full ms4 1236.00@cid35.00 1110.00@cid35.00 647.00@cid35.00 [175.00-700.00]

Scan #: 1-100

RT: 0.00-9.83

AV: 100

m/z Intensity Relative

|        |     |       |
|--------|-----|-------|
| 194.14 | 0.0 | 0.63  |
| 204.01 | 0.0 | 1.02  |
| 218.06 | 0.0 | 0.83  |
| 220.16 | 0.0 | 0.65  |
| 227.09 | 0.6 | 12.41 |
| 229.11 | 0.2 | 5.38  |
| 236.09 | 0.4 | 8.89  |
| 245.10 | 0.9 | 20.35 |
| 287.18 | 0.0 | 0.94  |
| 315.26 | 0.0 | 1.00  |
| 324.22 | 0.0 | 0.81  |
| 343.29 | 0.1 | 2.32  |
| 344.14 | 0.0 | 0.59  |
| 353.25 | 0.0 | 0.91  |
| 366.13 | 0.1 | 1.39  |
| 366.30 | 0.0 | 0.76  |
| 367.12 | 0.1 | 1.21  |

|        |     |        |
|--------|-----|--------|
| 368.30 | 0.1 | 1.35   |
| 369.23 | 0.1 | 1.41   |
| 369.38 | 0.0 | 0.76   |
| 371.20 | 0.0 | 0.97   |
| 378.25 | 0.2 | 3.53   |
| 380.21 | 0.2 | 3.91   |
| 382.27 | 0.2 | 4.56   |
| 384.24 | 0.3 | 5.54   |
| 385.21 | 4.6 | 100.00 |
| 386.21 | 0.5 | 9.72   |
| 398.27 | 0.1 | 2.15   |
| 408.27 | 0.1 | 1.08   |
| 424.25 | 0.3 | 6.05   |
| 440.26 | 0.8 | 16.60  |
| 441.19 | 0.1 | 2.48   |
| 442.29 | 0.7 | 15.46  |
| 443.24 | 0.1 | 1.57   |
| 443.38 | 0.0 | 0.97   |
| 458.26 | 0.4 | 9.70   |
| 498.27 | 0.0 | 0.66   |
| 501.38 | 0.0 | 0.83   |
| 517.30 | 0.0 | 0.98   |
| 530.37 | 0.0 | 0.64   |
| 542.24 | 0.0 | 0.66   |
| 572.34 | 2.9 | 61.94  |
| 573.36 | 0.9 | 19.35  |
| 574.40 | 0.1 | 1.19   |
| 575.36 | 1.5 | 32.18  |
| 576.45 | 0.1 | 3.23   |
| 604.40 | 0.3 | 6.59   |
| 605.47 | 0.0 | 0.93   |
| 646.46 | 0.3 | 6.40   |
| 647.51 | 0.1 | 1.30   |

SPECTRUM - MS

6-27-13\_HMG56\_1235\_MS3\_660\_01.raw

ITMS + p ESI E Full ms3 1236.00@cid35.00 661.00@cid35.00 [180.00-700.00]

Scan #: 1-50

RT: 0.00-3.68

AV: 50

m/z Intensity Relative

|        |      |      |
|--------|------|------|
| 208.09 | 1.3  | 0.43 |
| 211.09 | 1.0  | 0.35 |
| 227.09 | 0.8  | 0.29 |
| 229.12 | 1.1  | 0.39 |
| 245.10 | 10.6 | 3.59 |
| 250.11 | 1.8  | 0.59 |
| 259.13 | 4.2  | 1.40 |
| 285.14 | 1.5  | 0.50 |
| 313.16 | 2.0  | 0.68 |

|        |       |        |
|--------|-------|--------|
| 323.20 | 1.4   | 0.46   |
| 353.21 | 6.6   | 2.24   |
| 354.22 | 0.8   | 0.27   |
| 382.23 | 1.0   | 0.33   |
| 383.24 | 5.4   | 1.83   |
| 384.21 | 1.0   | 0.33   |
| 387.27 | 4.0   | 1.34   |
| 398.24 | 12.4  | 4.17   |
| 399.23 | 2.0   | 0.68   |
| 415.27 | 40.2  | 13.58  |
| 416.28 | 6.4   | 2.15   |
| 417.26 | 1.3   | 0.44   |
| 424.24 | 1.5   | 0.51   |
| 430.29 | 2.3   | 0.79   |
| 431.24 | 10.6  | 3.58   |
| 432.27 | 1.2   | 0.40   |
| 433.28 | 296.0 | 100.00 |
| 434.28 | 44.9  | 15.16  |
| 454.21 | 0.8   | 0.27   |
| 456.33 | 1.6   | 0.55   |
| 472.28 | 70.4  | 23.77  |
| 473.30 | 11.8  | 3.99   |
| 486.29 | 1.1   | 0.37   |
| 515.32 | 4.3   | 1.44   |
| 516.35 | 1.1   | 0.36   |
| 554.36 | 0.9   | 0.31   |
| 558.24 | 5.1   | 1.73   |
| 559.36 | 0.9   | 0.30   |
| 562.45 | 1.9   | 0.63   |
| 586.36 | 138.6 | 46.83  |
| 587.37 | 33.7  | 11.37  |
| 589.38 | 4.3   | 1.45   |
| 590.41 | 1.1   | 0.39   |
| 597.40 | 2.3   | 0.77   |
| 597.89 | 1.2   | 0.41   |
| 614.36 | 2.3   | 0.76   |
| 618.39 | 46.4  | 15.67  |
| 619.39 | 11.3  | 3.81   |
| 624.39 | 1.3   | 0.42   |
| 660.42 | 41.6  | 14.06  |
| 661.43 | 8.9   | 3.01   |

SPECTRUM - MS

6-27-13\_HMG56\_1235\_MS3\_486\_01.raw

ITMS + p ESI E Full ms3 1236.00@cid35.00 487.00@cid35.00 [130.00-500.00]

Scan #: 1-50

RT: 0.00-3.67

AV: 50

| m/z | Intensity | Relative |
|-----|-----------|----------|
|-----|-----------|----------|

|        |     |      |
|--------|-----|------|
| 177.04 | 0.1 | 0.19 |
|--------|-----|------|

|        |      |        |
|--------|------|--------|
| 178.05 | 0.4  | 1.10   |
| 208.09 | 2.1  | 5.56   |
| 209.12 | 0.2  | 0.52   |
| 211.12 | 0.1  | 0.21   |
| 218.10 | 0.2  | 0.61   |
| 227.08 | 0.1  | 0.19   |
| 241.12 | 1.3  | 3.54   |
| 242.11 | 0.1  | 0.31   |
| 250.11 | 3.4  | 8.99   |
| 251.10 | 0.5  | 1.23   |
| 252.13 | 5.3  | 14.07  |
| 253.15 | 0.6  | 1.61   |
| 257.11 | 0.7  | 1.83   |
| 259.13 | 36.9 | 98.12  |
| 260.14 | 2.8  | 7.40   |
| 268.17 | 0.6  | 1.50   |
| 301.29 | 0.1  | 0.33   |
| 312.16 | 0.1  | 0.38   |
| 314.20 | 0.4  | 0.95   |
| 326.18 | 0.1  | 0.32   |
| 329.22 | 0.1  | 0.38   |
| 338.15 | 0.1  | 0.26   |
| 339.21 | 0.1  | 0.32   |
| 341.19 | 0.3  | 0.68   |
| 352.22 | 0.1  | 0.23   |
| 356.23 | 0.1  | 0.40   |
| 357.25 | 0.1  | 0.35   |
| 370.28 | 0.2  | 0.57   |
| 380.21 | 0.1  | 0.19   |
| 382.27 | 0.3  | 0.72   |
| 384.17 | 1.5  | 3.87   |
| 385.23 | 0.2  | 0.50   |
| 387.19 | 0.1  | 0.28   |
| 410.20 | 0.2  | 0.60   |
| 410.33 | 0.1  | 0.40   |
| 412.25 | 37.6 | 100.00 |
| 413.26 | 6.2  | 16.51  |
| 415.28 | 0.5  | 1.27   |
| 426.13 | 0.1  | 0.22   |
| 426.33 | 0.3  | 0.73   |
| 427.35 | 0.1  | 0.23   |
| 444.29 | 12.4 | 33.13  |
| 445.29 | 2.1  | 5.61   |
| 454.31 | 0.6  | 1.64   |
| 455.35 | 0.1  | 0.33   |
| 456.35 | 3.1  | 8.34   |
| 457.35 | 0.7  | 1.78   |
| 486.29 | 8.1  | 21.63  |
| 487.33 | 1.5  | 3.97   |



HMG 60 Mass spectral peak lists

SPECTRUM - MS

12-17-13\_HMG60\_1236\_MS2\_01.raw

ITMS + p ESI E Full ms2 1236.10@cid35.00 [340.00-2000.00]

Scan #: 1-20

RT: 0.00-1.98

AV: 20

| m/z | Intensity | Relative |
|-----|-----------|----------|
|-----|-----------|----------|

|         |       |       |
|---------|-------|-------|
| 433.22  | 139.6 | 33.88 |
| 434.23  | 24.5  | 5.94  |
| 486.25  | 19.0  | 4.60  |
| 586.28  | 23.1  | 5.61  |
| 660.31  | 280.9 | 68.16 |
| 661.32  | 79.8  | 19.36 |
| 724.38  | 28.0  | 6.80  |
| 779.42  | 20.7  | 5.03  |
| 834.39  | 73.8  | 17.89 |
| 835.39  | 29.9  | 7.25  |
| 916.97  | 153.3 | 37.19 |
| 917.46  | 143.0 | 34.69 |
| 917.96  | 75.0  | 18.19 |
| 918.47  | 22.6  | 5.48  |
| 935.40  | 20.0  | 4.86  |
| 993.46  | 27.2  | 6.60  |
| 993.98  | 29.0  | 7.04  |
| 1003.98 | 96.1  | 23.31 |
| 1004.49 | 92.4  | 22.42 |
| 1004.98 | 51.2  | 12.41 |
| 1030.51 | 297.1 | 72.09 |
| 1030.99 | 297.2 | 72.12 |
| 1031.48 | 176.1 | 42.74 |
| 1031.99 | 61.9  | 15.02 |
| 1062.16 | 33.7  | 8.17  |
| 1117.53 | 72.3  | 17.54 |
| 1118.04 | 99.2  | 24.07 |
| 1118.54 | 57.1  | 13.85 |
| 1119.07 | 22.3  | 5.41  |
| 1120.09 | 32.2  | 7.82  |
| 1173.56 | 66.1  | 16.05 |
| 1174.57 | 38.0  | 9.23  |
| 1235.62 | 296.0 | 71.83 |
| 1236.10 | 397.7 | 96.48 |
| 1236.58 | 283.2 | 68.70 |
| 1237.08 | 150.9 | 36.62 |
| 1361.60 | 23.1  | 5.61  |
| 1400.65 | 69.0  | 16.73 |
| 1401.66 | 45.9  | 11.13 |
| 1402.64 | 21.0  | 5.10  |
| 1535.69 | 29.3  | 7.11  |

|         |       |        |
|---------|-------|--------|
| 1536.70 | 22.0  | 5.33   |
| 1636.74 | 84.0  | 20.38  |
| 1637.75 | 68.2  | 16.55  |
| 1638.76 | 31.2  | 7.58   |
| 1810.85 | 412.1 | 100.00 |
| 1811.86 | 351.6 | 85.32  |
| 1812.86 | 178.6 | 43.33  |
| 1813.88 | 51.4  | 12.47  |
| 1984.98 | 36.3  | 8.82   |

SPECTRUM - MS

12-17-13\_HMG60\_1236\_MS3\_917\_01.raw

ITMS + p ESI E Full ms3 1236.10@cid35.00 917.50@cid35.00 [250.00-2000.00]

Scan #: 1-21

RT: 0.00-4.30

AV: 21

m/z Intensity Relative

|        |      |       |
|--------|------|-------|
| 415.21 | 0.7  | 1.08  |
| 433.22 | 21.2 | 35.07 |
| 434.23 | 3.9  | 6.47  |
| 435.23 | 0.6  | 0.94  |
| 472.26 | 1.5  | 2.43  |
| 534.34 | 1.6  | 2.73  |
| 586.28 | 3.7  | 6.10  |
| 587.27 | 1.0  | 1.58  |
| 660.31 | 40.7 | 67.42 |
| 661.32 | 12.4 | 20.62 |
| 662.32 | 2.3  | 3.79  |
| 664.40 | 0.8  | 1.36  |
| 674.85 | 1.2  | 1.96  |
| 675.33 | 0.9  | 1.56  |
| 692.38 | 6.5  | 10.78 |
| 692.89 | 4.3  | 7.21  |
| 693.38 | 1.8  | 3.03  |
| 699.34 | 0.6  | 0.92  |
| 704.33 | 0.6  | 1.04  |
| 706.40 | 2.4  | 3.97  |
| 707.39 | 0.9  | 1.44  |
| 711.84 | 1.2  | 1.95  |
| 712.35 | 0.8  | 1.34  |
| 724.38 | 11.5 | 19.04 |
| 725.40 | 4.3  | 7.08  |
| 726.41 | 0.8  | 1.32  |
| 814.92 | 0.6  | 1.07  |
| 822.92 | 0.6  | 0.97  |
| 823.45 | 0.6  | 0.94  |
| 916.97 | 18.0 | 29.90 |
| 917.47 | 18.9 | 31.29 |
| 917.97 | 11.0 | 18.28 |
| 918.47 | 3.3  | 5.47  |

|         |      |        |
|---------|------|--------|
| 1065.45 | 1.3  | 2.15   |
| 1066.44 | 0.8  | 1.31   |
| 1109.50 | 3.7  | 6.08   |
| 1110.49 | 1.8  | 2.99   |
| 1173.58 | 60.3 | 100.00 |
| 1174.58 | 35.3 | 58.52  |
| 1175.56 | 11.1 | 18.36  |
| 1176.55 | 1.5  | 2.44   |
| 1326.61 | 0.5  | 0.75   |
| 1361.62 | 1.6  | 2.71   |
| 1362.63 | 1.2  | 2.00   |
| 1363.63 | 0.5  | 0.77   |
| 1400.67 | 20.3 | 33.66  |
| 1401.68 | 14.4 | 23.88  |
| 1402.65 | 5.2  | 8.59   |
| 1403.66 | 0.9  | 1.56   |
| 1418.65 | 0.5  | 0.79   |

SPECTRUM - MS

12-17-13\_HMG60\_1236\_MS4\_917\_1173\_01.raw

ITMS + p ESI E Full ms4 1236.10@cid35.00 917.50@cid35.00 1174.00@cid35.00 [320.00-1200.00]

Scan #: 1-20

RT: 0.00-3.77

AV: 20

m/z Intensity Relative

|        |      |       |
|--------|------|-------|
| 384.15 | 0.0  | 0.11  |
| 384.34 | 0.0  | 0.13  |
| 435.30 | 0.3  | 0.80  |
| 436.27 | 0.1  | 0.20  |
| 456.31 | 0.1  | 0.14  |
| 470.39 | 0.0  | 0.11  |
| 472.20 | 0.3  | 0.76  |
| 472.40 | 0.2  | 0.44  |
| 473.27 | 0.0  | 0.12  |
| 474.26 | 0.2  | 0.44  |
| 486.32 | 0.3  | 0.93  |
| 487.30 | 0.1  | 0.23  |
| 492.27 | 0.1  | 0.18  |
| 502.30 | 0.1  | 0.22  |
| 516.26 | 0.1  | 0.23  |
| 534.33 | 10.5 | 29.30 |
| 535.33 | 2.1  | 5.80  |
| 536.06 | 0.0  | 0.11  |
| 536.34 | 0.1  | 0.40  |
| 562.34 | 0.1  | 0.37  |
| 590.31 | 0.2  | 0.55  |
| 625.35 | 0.4  | 0.98  |
| 626.31 | 0.1  | 0.31  |
| 651.33 | 0.0  | 0.12  |
| 662.29 | 0.3  | 0.94  |

|         |      |           |
|---------|------|-----------|
| 663.36  | 0.1  | 0.39      |
| 692.35  | 0.1  | 0.27      |
| 724.39  | 36.0 | 100.00    |
| 725.39  | 9.7  | 26.87     |
| 726.41  | 1.2  | 3.39      |
| 752.46  | 0.0  | 0.12      |
| 877.42  | 0.1  | 0.17      |
| 921.45  | 0.1  | 0.21      |
| 969.48  | 1.4  | 3.75      |
| 970.47  | 0.5  | 1.44      |
| 971.57  | 0.1  | 0.20      |
| 1067.52 |      | 0.3 0.96  |
| 1068.50 |      | 0.1 0.38  |
| 1074.49 |      | 0.4 1.10  |
| 1075.58 |      | 0.1 0.30  |
| 1100.56 |      | 0.0 0.11  |
| 1131.63 |      | 0.1 0.16  |
| 1141.55 |      | 0.4 1.05  |
| 1142.46 |      | 0.2 0.58  |
| 1142.69 |      | 0.1 0.32  |
| 1143.53 |      | 0.2 0.65  |
| 1144.51 |      | 0.1 0.16  |
| 1173.59 |      | 3.7 10.27 |
| 1174.57 |      | 2.0 5.62  |
| 1175.53 |      | 0.7 1.85  |

SPECTRUM - MS

12-17-13\_HMG60\_1236\_MS3\_1109\_01.raw

ITMS + p ESI E Full ms3 1236.10@cid35.00 1110.00@cid35.00 [305.00-1200.00]

Scan #: 1-50

RT: 0.00-35.61

AV: 50

m/z Intensity Relative

|        |     |        |
|--------|-----|--------|
| 424.25 | 0.0 | 1.25   |
| 433.21 | 0.2 | 11.16  |
| 434.32 | 0.0 | 0.96   |
| 472.25 | 0.6 | 33.48  |
| 473.24 | 0.1 | 6.10   |
| 586.28 | 0.1 | 4.32   |
| 625.26 | 0.2 | 10.53  |
| 626.29 | 0.0 | 1.50   |
| 657.44 | 0.0 | 1.14   |
| 660.31 | 1.3 | 72.96  |
| 661.31 | 0.3 | 18.18  |
| 662.34 | 0.0 | 1.05   |
| 699.34 | 1.8 | 100.00 |
| 700.34 | 0.5 | 25.57  |
| 701.40 | 0.0 | 0.94   |
| 948.47 | 0.0 | 0.72   |
| 952.41 | 0.1 | 2.88   |

|         |     |       |      |
|---------|-----|-------|------|
| 980.44  | 0.2 | 12.84 |      |
| 981.35  | 0.0 | 2.41  |      |
| 1021.38 |     | 0.0   | 0.66 |
| 1028.32 |     | 0.0   | 0.72 |
| 1034.53 |     | 0.0   | 1.52 |
| 1036.38 |     | 0.0   | 1.17 |
| 1036.61 |     | 0.0   | 0.68 |
| 1040.47 |     | 0.0   | 0.76 |
| 1048.33 |     | 0.0   | 0.73 |
| 1048.61 |     | 0.0   | 0.86 |
| 1049.17 |     | 0.0   | 0.72 |
| 1050.51 |     | 0.0   | 0.67 |
| 1051.44 |     | 0.0   | 0.67 |
| 1058.47 |     | 0.0   | 0.78 |
| 1064.44 |     | 0.0   | 1.32 |
| 1070.64 |     | 0.0   | 2.08 |
| 1072.51 | 0.2 | 13.17 |      |
| 1073.38 | 0.0 | 0.78  |      |
| 1073.58 | 0.0 | 0.68  |      |
| 1076.43 | 0.2 | 12.51 |      |
| 1077.35 | 0.0 | 1.11  |      |
| 1077.56 | 0.0 | 0.71  |      |
| 1078.59 | 0.0 | 1.84  |      |
| 1079.27 | 0.0 | 1.01  |      |
| 1079.44 | 0.0 | 0.87  |      |
| 1079.63 | 0.0 | 1.02  |      |
| 1080.05 | 0.0 | 0.66  |      |
| 1080.31 | 0.0 | 1.34  |      |
| 1090.56 | 0.1 | 5.47  |      |
| 1108.45 | 0.1 | 4.53  |      |
| 1109.47 | 0.3 | 14.65 |      |
| 1110.46 | 0.1 | 7.48  |      |
| 1111.44 | 0.0 | 0.71  |      |

SPECTRUM - MS

12-17-13\_HMG60\_1236\_MS4\_1109\_472\_01.raw

ITMS + p ESI E Full ms4 1236.10@cid35.00 1110.00@cid35.00 473.00@cid35.00 [130.00-500.00]

Scan #: 1-50

RT: 0.00-81.63

AV: 50

| m/z    | Intensity | Relative |
|--------|-----------|----------|
| 148.96 | 0.0       | 1.70     |
| 154.81 | 0.0       | 0.78     |
| 170.99 | 0.0       | 4.14     |
| 179.96 | 0.0       | 4.03     |
| 180.13 | 0.0       | 1.12     |
| 193.97 | 0.0       | 5.22     |
| 203.87 | 0.0       | 1.05     |
| 204.09 | 0.0       | 2.30     |
| 218.06 | 0.0       | 2.52     |

|        |     |        |
|--------|-----|--------|
| 220.07 | 0.0 | 15.12  |
| 221.13 | 0.0 | 0.80   |
| 227.06 | 0.0 | 63.90  |
| 228.13 | 0.0 | 1.27   |
| 236.03 | 0.0 | 11.65  |
| 237.05 | 0.0 | 1.05   |
| 237.98 | 0.0 | 1.42   |
| 243.12 | 0.0 | 2.89   |
| 245.08 | 0.0 | 23.51  |
| 245.99 | 0.0 | 1.42   |
| 250.07 | 0.0 | 1.12   |
| 252.11 | 0.0 | 0.87   |
| 268.10 | 0.0 | 100.00 |
| 269.19 | 0.0 | 11.13  |
| 286.93 | 0.0 | 0.83   |
| 287.11 | 0.0 | 2.27   |
| 315.15 | 0.0 | 97.43  |
| 316.17 | 0.0 | 7.92   |
| 324.14 | 0.0 | 2.59   |
| 325.31 | 0.0 | 1.21   |
| 327.20 | 0.0 | 1.08   |
| 353.14 | 0.0 | 1.02   |
| 366.20 | 0.0 | 1.26   |
| 368.12 | 0.0 | 1.11   |
| 369.88 | 0.0 | 1.14   |
| 380.21 | 0.0 | 4.00   |
| 396.33 | 0.0 | 1.68   |
| 398.26 | 0.0 | 9.28   |
| 399.16 | 0.0 | 2.44   |
| 408.26 | 0.0 | 1.17   |
| 430.12 | 0.0 | 1.56   |
| 430.33 | 0.0 | 1.17   |
| 439.87 | 0.0 | 1.13   |
| 440.20 | 0.0 | 13.78  |
| 442.12 | 0.0 | 4.21   |
| 442.28 | 0.0 | 4.46   |
| 442.54 | 0.0 | 0.82   |
| 455.28 | 0.0 | 0.90   |
| 472.30 | 0.0 | 10.48  |
| 473.31 | 0.0 | 1.41   |
| 480.96 | 0.0 | 1.19   |

SPECTRUM - MS

12-17-13\_HMG60\_1236\_MS4\_1109\_660\_01.raw

ITMS + p ESI E Full ms4 1236.10@cid35.00 1110.00@cid35.00 661.00@cid35.00 [180.00-700.00]

Scan #: 1-51

RT: 0.00-28.05

AV: 51

| m/z | Intensity | Relative |
|-----|-----------|----------|
|-----|-----------|----------|

|        |     |      |
|--------|-----|------|
| 210.97 | 0.0 | 0.50 |
|--------|-----|------|

|        |     |        |
|--------|-----|--------|
| 211.93 | 0.0 | 0.26   |
| 245.08 | 0.0 | 3.21   |
| 246.01 | 0.0 | 0.27   |
| 246.19 | 0.0 | 0.46   |
| 313.13 | 0.0 | 0.48   |
| 323.16 | 0.0 | 0.51   |
| 353.02 | 0.0 | 0.57   |
| 353.19 | 0.0 | 1.39   |
| 366.25 | 0.0 | 0.51   |
| 368.17 | 0.0 | 0.33   |
| 383.23 | 0.0 | 1.38   |
| 387.22 | 0.0 | 0.63   |
| 398.20 | 0.0 | 2.10   |
| 415.21 | 0.0 | 9.64   |
| 416.25 | 0.0 | 0.77   |
| 431.27 | 0.0 | 1.38   |
| 432.27 | 0.0 | 0.41   |
| 433.22 | 0.5 | 100.00 |
| 434.20 | 0.0 | 9.29   |
| 435.23 | 0.0 | 0.33   |
| 472.24 | 0.1 | 12.27  |
| 473.21 | 0.0 | 1.07   |
| 473.37 | 0.0 | 0.40   |
| 475.49 | 0.0 | 0.34   |
| 513.24 | 0.0 | 0.34   |
| 515.28 | 0.0 | 1.07   |
| 530.27 | 0.0 | 0.30   |
| 544.27 | 0.0 | 0.37   |
| 556.27 | 0.0 | 0.49   |
| 557.32 | 0.0 | 0.25   |
| 558.22 | 0.0 | 1.36   |
| 559.18 | 0.0 | 0.51   |
| 584.27 | 0.0 | 0.32   |
| 586.27 | 0.2 | 45.49  |
| 586.98 | 0.0 | 0.39   |
| 587.29 | 0.0 | 8.68   |
| 587.61 | 0.0 | 0.42   |
| 588.29 | 0.0 | 0.71   |
| 589.43 | 0.0 | 0.54   |
| 614.30 | 0.0 | 0.25   |
| 617.96 | 0.0 | 0.25   |
| 618.34 | 0.0 | 9.20   |
| 619.22 | 0.0 | 0.70   |
| 619.39 | 0.0 | 1.28   |
| 628.30 | 0.0 | 0.41   |
| 659.98 | 0.0 | 0.89   |
| 660.32 | 0.1 | 18.95  |
| 661.07 | 0.0 | 0.56   |
| 661.44 | 0.0 | 1.67   |

SPECTRUM - MS

12-17-13\_HMG60\_1236\_MS3\_1004\_01.raw

ITMS + p ESI E Full ms3 1236.10@cid35.00 1004.60@cid35.00 [275.00-2000.00]

Scan #: 1-20

RT: 0.00-4.21

AV: 20

m/z Intensity Relative

|         |      |        |
|---------|------|--------|
| 433.22  | 6.7  | 34.37  |
| 434.22  | 1.1  | 5.54   |
| 472.27  | 1.6  | 8.23   |
| 514.28  | 0.6  | 3.18   |
| 534.33  | 0.7  | 3.32   |
| 664.38  | 1.5  | 7.42   |
| 685.37  | 0.6  | 3.23   |
| 704.31  | 1.0  | 5.26   |
| 706.39  | 3.8  | 19.39  |
| 707.39  | 1.3  | 6.78   |
| 724.39  | 3.4  | 17.42  |
| 725.40  | 1.2  | 6.19   |
| 760.45  | 0.6  | 3.28   |
| 768.49  | 0.6  | 3.03   |
| 770.41  | 0.8  | 4.10   |
| 779.42  | 19.6 | 100.00 |
| 779.92  | 14.4 | 73.40  |
| 780.43  | 5.7  | 29.05  |
| 780.93  | 1.3  | 6.43   |
| 798.88  | 0.9  | 4.84   |
| 799.40  | 0.7  | 3.73   |
| 834.40  | 11.3 | 57.58  |
| 835.42  | 4.1  | 20.96  |
| 836.41  | 0.8  | 4.04   |
| 886.35  | 1.1  | 5.36   |
| 888.27  | 1.6  | 8.10   |
| 901.95  | 1.1  | 5.55   |
| 902.46  | 1.1  | 5.83   |
| 902.95  | 0.5  | 2.58   |
| 909.96  | 1.6  | 8.30   |
| 910.46  | 1.7  | 8.50   |
| 910.97  | 0.8  | 4.12   |
| 946.22  | 1.2  | 5.99   |
| 1004.00 | 6.9  | 34.99  |
| 1004.51 | 7.4  | 37.52  |
| 1004.99 | 4.5  | 22.98  |
| 1005.53 | 1.8  | 9.30   |
| 1065.45 | 2.1  | 10.78  |
| 1066.45 | 0.9  | 4.71   |
| 1125.56 | 1.6  | 8.03   |
| 1126.57 | 0.9  | 4.38   |
| 1173.59 | 16.3 | 83.01  |
| 1174.58 | 9.3  | 47.25  |
| 1175.56 | 2.7  | 13.63  |



|         |     |       |
|---------|-----|-------|
| 1535.70 | 2.4 | 12.42 |
| 1536.72 | 1.7 | 8.60  |
| 1574.73 | 9.4 | 47.76 |
| 1575.76 | 7.9 | 40.20 |
| 1576.76 | 2.6 | 13.21 |
| 1577.70 | 0.5 | 2.73  |

SPECTRUM - MS

12-17-13\_HMG60\_1236\_MS4\_1004\_1174\_01.raw

ITMS + p ESI E Full ms4 1236.10@cid35.00 1004.60@cid35.00 1174.00@cid35.00 [320.00-1200.00]

Scan #: 1-20

RT: 0.00-4.22

AV: 20

m/z Intensity Relative

|         |     |        |
|---------|-----|--------|
| 435.24  | 0.1 | 1.43   |
| 470.32  | 0.0 | 0.35   |
| 472.30  | 0.1 | 1.57   |
| 474.27  | 0.0 | 0.37   |
| 486.17  | 0.0 | 0.24   |
| 486.37  | 0.0 | 0.32   |
| 487.22  | 0.0 | 0.41   |
| 492.38  | 0.0 | 0.23   |
| 502.15  | 0.0 | 0.28   |
| 516.30  | 0.0 | 0.37   |
| 534.33  | 2.0 | 28.24  |
| 535.33  | 0.4 | 5.30   |
| 536.32  | 0.0 | 0.27   |
| 562.28  | 0.0 | 0.31   |
| 590.49  | 0.0 | 0.22   |
| 591.35  | 0.0 | 0.19   |
| 625.37  | 0.1 | 1.93   |
| 626.30  | 0.0 | 0.21   |
| 637.43  | 0.0 | 0.28   |
| 662.25  | 0.0 | 0.62   |
| 692.30  | 0.0 | 0.27   |
| 706.38  | 0.0 | 0.25   |
| 724.38  | 7.1 | 100.00 |
| 725.40  | 1.8 | 25.40  |
| 726.39  | 0.1 | 1.81   |
| 726.58  | 0.1 | 0.76   |
| 863.22  | 0.0 | 0.19   |
| 951.43  | 0.0 | 0.46   |
| 952.52  | 0.0 | 0.22   |
| 969.47  | 0.1 | 1.77   |
| 969.61  | 0.1 | 0.95   |
| 970.48  | 0.1 | 1.05   |
| 971.58  | 0.0 | 0.22   |
| 1014.09 | 0.0 | 0.22   |
| 1067.43 | 0.0 | 0.48   |
| 1067.62 | 0.0 | 0.51   |

|         |     |       |
|---------|-----|-------|
| 1074.53 | 0.0 | 0.48  |
| 1075.34 | 0.0 | 0.24  |
| 1075.54 | 0.0 | 0.31  |
| 1141.42 | 0.1 | 0.89  |
| 1141.67 | 0.0 | 0.37  |
| 1142.42 | 0.0 | 0.44  |
| 1142.68 | 0.0 | 0.56  |
| 1143.55 | 0.0 | 0.70  |
| 1144.58 | 0.0 | 0.22  |
| 1173.59 | 0.8 | 10.73 |
| 1174.50 | 0.3 | 4.06  |
| 1174.68 | 0.2 | 3.13  |
| 1174.94 | 0.0 | 0.19  |
| 1175.68 | 0.0 | 0.65  |

SPECTRUM - MS

12-17-13\_HMG60\_1236\_MS3\_834\_01.raw

ITMS + p ESI E Full ms3 1236.10@cid35.00 835.00@cid35.00 [225.00-900.00]

Scan #: 1-50

RT: 0.00-12.82

AV: 50

m/z Intensity Relative

|        |      |        |
|--------|------|--------|
| 245.15 | 0.1  | 0.69   |
| 299.12 | 0.0  | 0.41   |
| 353.14 | 0.1  | 1.09   |
| 364.16 | 0.1  | 0.91   |
| 368.16 | 0.1  | 1.04   |
| 383.16 | 0.1  | 1.35   |
| 384.15 | 0.0  | 0.45   |
| 387.20 | 0.0  | 0.38   |
| 401.16 | 0.0  | 0.45   |
| 415.21 | 0.9  | 8.07   |
| 416.23 | 0.1  | 1.18   |
| 424.19 | 0.2  | 2.18   |
| 426.21 | 0.1  | 1.02   |
| 431.23 | 0.2  | 1.44   |
| 433.21 | 10.6 | 100.00 |
| 434.22 | 1.8  | 17.51  |
| 435.23 | 0.2  | 2.08   |
| 442.22 | 0.5  | 4.90   |
| 443.21 | 0.1  | 0.91   |
| 558.21 | 0.1  | 0.67   |
| 572.25 | 0.4  | 3.45   |
| 573.24 | 0.1  | 1.11   |
| 586.28 | 0.2  | 1.84   |
| 604.28 | 0.1  | 0.57   |
| 621.32 | 0.1  | 0.87   |
| 628.29 | 0.1  | 1.19   |
| 632.29 | 0.0  | 0.40   |
| 646.28 | 4.5  | 42.15  |

|        |     |       |
|--------|-----|-------|
| 647.30 | 1.2 | 11.81 |
| 648.29 | 0.2 | 2.08  |
| 660.28 | 0.2 | 1.83  |
| 689.32 | 0.1 | 1.40  |
| 690.32 | 0.1 | 0.49  |
| 730.34 | 0.1 | 0.50  |
| 758.32 | 0.1 | 0.78  |
| 759.39 | 0.0 | 0.38  |
| 760.34 | 5.3 | 50.55 |
| 761.35 | 1.9 | 17.82 |
| 762.36 | 0.3 | 2.92  |
| 763.31 | 0.4 | 3.41  |
| 764.40 | 0.1 | 0.79  |
| 788.32 | 0.2 | 1.99  |
| 789.25 | 0.0 | 0.37  |
| 792.38 | 1.0 | 9.89  |
| 793.40 | 0.4 | 3.43  |
| 794.41 | 0.1 | 0.88  |
| 804.27 | 0.0 | 0.46  |
| 834.38 | 1.6 | 15.29 |
| 835.41 | 0.6 | 5.21  |
| 836.46 | 0.1 | 0.87  |

SPECTRUM - MS

12-17-13\_HMG60\_1236\_MS4\_834\_646\_01.raw

ITMS + p ESI E Full ms4 1236.10@cid35.00 835.00@cid35.00 647.00@cid35.00 [175.00-700.00]

Scan #: 1-50

RT: 0.00-12.18

AV: 50

| m/z    | Intensity | Relative |
|--------|-----------|----------|
| 204.95 | 0.0       | 1.01     |
| 218.11 | 0.0       | 1.64     |
| 220.13 | 0.0       | 1.37     |
| 227.10 | 0.0       | 1.32     |
| 229.05 | 0.0       | 8.00     |
| 230.03 | 0.0       | 1.12     |
| 236.09 | 0.0       | 5.22     |
| 237.09 | 0.0       | 0.94     |
| 245.10 | 0.1       | 13.11    |
| 246.08 | 0.0       | 1.15     |
| 335.93 | 0.0       | 1.21     |
| 350.05 | 0.0       | 1.44     |
| 364.11 | 0.0       | 3.55     |
| 364.31 | 0.0       | 2.11     |
| 365.10 | 0.0       | 1.09     |
| 365.28 | 0.0       | 1.21     |
| 366.22 | 0.0       | 1.20     |
| 368.15 | 0.0       | 6.29     |
| 369.12 | 0.0       | 3.66     |
| 382.15 | 0.0       | 1.21     |

|        |     |        |
|--------|-----|--------|
| 384.12 | 0.0 | 2.49   |
| 385.23 | 0.0 | 1.32   |
| 396.14 | 0.0 | 0.85   |
| 398.16 | 0.0 | 3.26   |
| 398.34 | 0.0 | 0.98   |
| 408.12 | 0.0 | 1.13   |
| 415.17 | 0.0 | 2.85   |
| 417.21 | 0.0 | 3.12   |
| 424.20 | 0.1 | 11.62  |
| 425.31 | 0.0 | 1.51   |
| 426.23 | 0.0 | 3.86   |
| 433.22 | 0.5 | 100.00 |
| 434.22 | 0.1 | 18.13  |
| 435.24 | 0.0 | 2.14   |
| 440.16 | 0.0 | 2.20   |
| 442.18 | 0.0 | 4.62   |
| 442.42 | 0.0 | 1.13   |
| 458.24 | 0.0 | 7.80   |
| 459.26 | 0.0 | 0.97   |
| 475.08 | 0.0 | 2.69   |
| 540.19 | 0.0 | 2.54   |
| 554.26 | 0.0 | 1.37   |
| 572.25 | 0.5 | 89.54  |
| 573.17 | 0.1 | 17.80  |
| 573.38 | 0.0 | 8.13   |
| 574.34 | 0.0 | 3.17   |
| 576.18 | 0.0 | 1.06   |
| 604.30 | 0.0 | 3.30   |
| 646.38 | 0.1 | 10.04  |
| 647.28 | 0.0 | 4.75   |

SPECTRUM - MS

12-17-13\_HMG60\_1236\_MS3\_935\_01.raw

ITMS + p ESI E Full ms3 1236.10@cid35.00 936.00@cid35.00 [255.00-1000.00]

Scan #: 1-20

RT: 0.00-3.96

AV: 20

m/z      Intensity      Relative

|        |     |       |
|--------|-----|-------|
| 398.16 | 0.0 | 0.76  |
| 412.15 | 0.1 | 2.21  |
| 413.22 | 0.0 | 0.51  |
| 424.21 | 0.1 | 1.48  |
| 430.15 | 0.0 | 0.46  |
| 440.23 | 0.0 | 0.51  |
| 472.25 | 4.5 | 98.60 |
| 473.35 | 0.5 | 10.10 |
| 474.25 | 0.1 | 1.81  |
| 486.26 | 2.3 | 50.25 |
| 487.24 | 0.5 | 11.06 |
| 488.19 | 0.0 | 0.81  |

|        |     |        |
|--------|-----|--------|
| 625.28 | 0.8 | 17.30  |
| 626.39 | 0.1 | 3.09   |
| 627.31 | 0.0 | 0.89   |
| 657.24 | 0.0 | 0.98   |
| 699.34 | 4.6 | 100.00 |
| 700.33 | 1.3 | 28.35  |
| 701.29 | 0.3 | 6.33   |
| 708.21 | 0.0 | 0.33   |
| 712.41 | 0.0 | 0.37   |
| 724.19 | 0.0 | 0.35   |
| 724.31 | 0.0 | 0.50   |
| 724.52 | 0.0 | 1.04   |
| 778.40 | 0.0 | 0.63   |
| 780.48 | 0.0 | 0.48   |
| 788.39 | 0.0 | 0.44   |
| 818.25 | 0.0 | 0.39   |
| 825.76 | 0.0 | 0.39   |
| 830.00 | 0.0 | 0.41   |
| 859.46 | 0.0 | 0.44   |
| 864.32 | 0.0 | 0.97   |
| 864.55 | 0.0 | 0.49   |
| 875.43 | 0.0 | 0.52   |
| 889.40 | 0.0 | 0.42   |
| 893.41 | 0.1 | 1.22   |
| 899.32 | 0.0 | 1.03   |
| 899.50 | 0.1 | 1.80   |
| 899.98 | 0.1 | 1.27   |
| 900.35 | 0.0 | 0.65   |
| 903.34 | 0.0 | 0.48   |
| 904.30 | 0.0 | 0.89   |
| 905.30 | 0.0 | 0.48   |
| 917.30 | 0.0 | 0.35   |
| 919.34 | 0.0 | 0.40   |
| 935.40 | 1.2 | 25.26  |
| 936.42 | 0.6 | 13.91  |
| 936.99 | 0.0 | 0.37   |
| 937.40 | 0.1 | 2.50   |
| 937.60 | 0.0 | 0.98   |

SPECTRUM - MS

12-17-13\_HMG60\_1236\_MS4\_935\_486\_01.raw

ITMS + p ESI E Full ms4 1236.10@cid35.00 936.00@cid35.00 487.00@cid35.00 [130.00-500.00]

Scan #: 1-50

RT: 0.00-36.36

AV: 50

| m/z    | Intensity | Relative |
|--------|-----------|----------|
| 177.90 | 0.0       | 0.57     |
| 190.01 | 0.0       | 0.40     |
| 208.05 | 0.0       | 5.42     |
| 208.76 | 0.0       | 0.27     |

|        |     |        |
|--------|-----|--------|
| 209.06 | 0.0 | 0.59   |
| 210.11 | 0.0 | 0.31   |
| 211.16 | 0.0 | 0.33   |
| 213.05 | 0.0 | 0.80   |
| 218.08 | 0.0 | 0.53   |
| 227.00 | 0.0 | 0.38   |
| 241.08 | 0.0 | 6.35   |
| 242.14 | 0.0 | 0.40   |
| 243.09 | 0.0 | 0.42   |
| 250.09 | 0.0 | 8.52   |
| 251.07 | 0.0 | 1.35   |
| 252.18 | 0.0 | 9.08   |
| 253.04 | 0.0 | 0.69   |
| 257.08 | 0.0 | 1.97   |
| 259.10 | 0.1 | 91.64  |
| 260.14 | 0.0 | 8.67   |
| 268.11 | 0.0 | 3.40   |
| 273.12 | 0.0 | 0.59   |
| 286.92 | 0.0 | 0.32   |
| 298.22 | 0.0 | 0.36   |
| 301.07 | 0.0 | 0.58   |
| 337.99 | 0.0 | 0.29   |
| 341.30 | 0.0 | 0.27   |
| 342.29 | 0.0 | 0.29   |
| 365.74 | 0.0 | 0.29   |
| 370.25 | 0.0 | 0.66   |
| 378.99 | 0.0 | 0.53   |
| 382.20 | 0.0 | 2.48   |
| 384.05 | 0.0 | 3.71   |
| 384.23 | 0.0 | 1.64   |
| 385.21 | 0.0 | 1.03   |
| 393.98 | 0.0 | 0.66   |
| 410.25 | 0.0 | 1.35   |
| 412.20 | 0.1 | 100.00 |
| 413.21 | 0.0 | 18.70  |
| 414.25 | 0.0 | 2.20   |
| 415.18 | 0.0 | 3.24   |
| 431.15 | 0.0 | 0.41   |
| 444.24 | 0.1 | 62.51  |
| 445.26 | 0.0 | 10.52  |
| 446.29 | 0.0 | 1.63   |
| 453.98 | 0.0 | 0.30   |
| 462.50 | 0.0 | 0.43   |
| 486.26 | 0.1 | 40.55  |
| 487.25 | 0.0 | 3.90   |
| 487.52 | 0.0 | 0.39   |

SPECTRUM - MS

12-17-13\_HMG60\_1236\_MS4\_935\_472\_01.raw

ITMS + p ESI E Full ms4 1236.10@cid35.00 936.00@cid35.00 473.00@cid35.00 [130.00-500.00]

Scan #: 1-50

RT: 0.00-54.93

AV: 50

| m/z    | Intensity | Relative |
|--------|-----------|----------|
| 148.95 | 0.0       | 3.07     |
| 170.99 | 0.0       | 1.61     |
| 178.06 | 0.0       | 1.02     |
| 187.97 | 0.0       | 1.96     |
| 193.99 | 0.0       | 6.49     |
| 203.93 | 0.0       | 5.06     |
| 204.09 | 0.0       | 7.35     |
| 218.07 | 0.0       | 1.42     |
| 220.05 | 0.0       | 12.34    |
| 220.98 | 0.0       | 0.89     |
| 227.05 | 0.1       | 67.65    |
| 228.07 | 0.0       | 5.08     |
| 232.08 | 0.0       | 1.81     |
| 236.09 | 0.0       | 16.23    |
| 237.01 | 0.0       | 1.24     |
| 243.06 | 0.0       | 1.02     |
| 245.10 | 0.0       | 38.21    |
| 246.11 | 0.0       | 1.09     |
| 250.10 | 0.0       | 2.16     |
| 268.10 | 0.1       | 100.00   |
| 269.13 | 0.0       | 6.70     |
| 287.09 | 0.0       | 2.85     |
| 315.14 | 0.1       | 80.98    |
| 316.18 | 0.0       | 6.50     |
| 317.11 | 0.0       | 0.91     |
| 317.24 | 0.0       | 1.04     |
| 324.17 | 0.0       | 1.36     |
| 339.18 | 0.0       | 1.35     |
| 365.95 | 0.0       | 1.30     |
| 367.23 | 0.0       | 1.48     |
| 380.01 | 0.0       | 1.03     |
| 380.23 | 0.0       | 6.27     |
| 381.11 | 0.0       | 1.03     |
| 385.10 | 0.0       | 0.95     |
| 396.20 | 0.0       | 1.97     |
| 398.16 | 0.0       | 15.64    |
| 399.14 | 0.0       | 5.36     |
| 408.21 | 0.0       | 1.17     |
| 430.27 | 0.0       | 5.19     |
| 431.23 | 0.0       | 0.94     |
| 440.15 | 0.0       | 34.71    |
| 441.12 | 0.0       | 3.86     |
| 441.33 | 0.0       | 1.09     |
| 442.23 | 0.0       | 7.85     |
| 443.26 | 0.0       | 1.36     |
| 471.94 | 0.0       | 1.36     |
| 472.25 | 0.1       | 54.67    |

|        |     |      |
|--------|-----|------|
| 473.01 | 0.0 | 1.36 |
| 473.27 | 0.0 | 7.23 |
| 474.36 | 0.0 | 1.67 |



## HMG 62 Mass spectral peak lists

Mass spectra were acquired in profile mode, then centroided using the valley detection algorithm. The top 50 peaks are shown. Isolation mass and width are adjusted to capture an entire isotopic envelope, where possible.

### SPECTRUM - MS

6-28-13\_HMG62\_1235\_MS2\_01.raw

ITMS + p ESI E Full ms2 1236.50@cid35.00 [340.00-2000.00]

Scan #: 1-20

RT: 0.00-1.65

AV: 20

| m/z     | Intensity | Relative |
|---------|-----------|----------|
| 433.28  | 588.7     | 40.62    |
| 434.28  | 98.8      | 6.82     |
| 486.31  | 84.4      | 5.82     |
| 660.40  | 557.6     | 38.47    |
| 661.42  | 152.7     | 10.53    |
| 724.49  | 151.4     | 10.45    |
| 760.46  | 83.4      | 5.76     |
| 799.00  | 91.1      | 6.28     |
| 834.50  | 778.9     | 53.74    |
| 835.51  | 270.4     | 18.65    |
| 917.09  | 337.3     | 23.27    |
| 917.58  | 295.2     | 20.37    |
| 918.08  | 162.4     | 11.20    |
| 993.58  | 103.9     | 7.17     |
| 994.10  | 103.2     | 7.12     |
| 1004.15 | 1449.5    | 100.00   |
| 1004.65 | 1347.3    | 92.95    |
| 1005.14 | 746.2     | 51.48    |
| 1005.63 | 282.8     | 19.51    |
| 1030.64 | 655.6     | 45.23    |
| 1031.14 | 633.9     | 43.73    |
| 1031.64 | 354.4     | 24.45    |
| 1032.13 | 132.2     | 9.12     |
| 1117.69 | 390.1     | 26.91    |
| 1118.19 | 441.0     | 30.43    |
| 1118.70 | 294.5     | 20.32    |
| 1119.20 | 157.5     | 10.86    |
| 1173.68 | 161.1     | 11.11    |
| 1174.71 | 95.1      | 6.56     |
| 1187.70 | 168.4     | 11.62    |
| 1188.69 | 93.4      | 6.44     |
| 1207.72 | 110.1     | 7.60     |
| 1235.76 | 1057.8    | 72.98    |
| 1236.26 | 1288.9    | 88.92    |
| 1236.75 | 966.8     | 66.70    |
| 1237.24 | 533.6     | 36.81    |
| 1237.75 | 87.6      | 6.05     |

|         |        |       |       |
|---------|--------|-------|-------|
| 1283.72 | 92.7   | 6.40  |       |
| 1347.81 | 162.8  | 11.23 |       |
| 1348.81 | 109.1  | 7.53  |       |
| 1574.94 | 213.2  | 14.71 |       |
| 1575.93 | 164.1  | 11.32 |       |
| 1636.98 | 1135.6 |       | 78.35 |
| 1637.99 | 837.5  | 57.78 |       |
| 1639.00 | 391.7  | 27.02 |       |
| 1639.99 | 108.1  | 7.46  |       |
| 1811.15 | 812.5  | 56.06 |       |
| 1812.16 | 675.3  | 46.59 |       |
| 1813.16 | 365.9  | 25.25 |       |
| 1814.15 | 118.2  | 8.15  |       |

SPECTRUM - MS

6-28-13\_HMG62\_1235\_MS3\_486\_01.raw

ITMS + p ESI E Full ms3 1236.50@cid35.00 487.00@cid35.00 [130.00-500.00]

Scan #: 1-50

RT: 0.00-7.93

AV: 50

m/z Intensity Relative

|        |     |       |
|--------|-----|-------|
| 178.06 | 0.1 | 0.99  |
| 208.09 | 0.3 | 6.43  |
| 209.15 | 0.0 | 0.66  |
| 218.14 | 0.0 | 0.45  |
| 241.17 | 0.2 | 4.86  |
| 250.04 | 0.2 | 4.52  |
| 250.19 | 0.2 | 4.19  |
| 251.17 | 0.0 | 0.85  |
| 252.13 | 0.7 | 13.71 |
| 253.12 | 0.1 | 1.70  |
| 257.11 | 0.1 | 1.58  |
| 259.13 | 5.1 | 99.29 |
| 260.14 | 0.5 | 9.88  |
| 268.26 | 0.1 | 1.51  |
| 282.21 | 0.1 | 1.07  |
| 298.06 | 0.0 | 0.40  |
| 301.16 | 0.0 | 0.97  |
| 312.18 | 0.1 | 1.77  |
| 314.22 | 0.1 | 2.45  |
| 315.25 | 0.0 | 0.39  |
| 326.15 | 0.1 | 1.20  |
| 329.21 | 0.1 | 2.33  |
| 341.12 | 0.0 | 0.85  |
| 356.33 | 0.0 | 0.38  |
| 370.18 | 0.0 | 0.45  |
| 380.24 | 0.0 | 0.47  |
| 382.09 | 0.0 | 0.43  |
| 382.29 | 0.1 | 1.18  |

|        |     |        |
|--------|-----|--------|
| 384.17 | 0.2 | 4.54   |
| 385.29 | 0.0 | 0.43   |
| 387.16 | 0.0 | 0.42   |
| 387.31 | 0.0 | 0.39   |
| 410.25 | 0.1 | 1.45   |
| 411.15 | 0.0 | 0.38   |
| 412.24 | 5.1 | 100.00 |
| 413.26 | 0.9 | 17.78  |
| 415.23 | 0.1 | 2.00   |
| 416.19 | 0.0 | 0.58   |
| 426.33 | 0.1 | 1.14   |
| 427.26 | 0.1 | 1.10   |
| 429.19 | 0.0 | 0.38   |
| 444.29 | 3.1 | 60.18  |
| 445.27 | 0.7 | 13.25  |
| 454.34 | 0.2 | 3.50   |
| 455.32 | 0.0 | 0.61   |
| 456.35 | 1.0 | 19.95  |
| 457.37 | 0.2 | 4.77   |
| 471.21 | 0.0 | 0.76   |
| 486.30 | 1.5 | 30.28  |
| 487.33 | 0.4 | 7.08   |

SPECTRUM - MS

6-28-13\_HMG62\_1235\_MS3\_1283\_01.raw

ITMS + p ESI E Full ms3 1236.50@cid35.00 1284.40@cid35.00 [350.00-1300.00]

Scan #: 1-20

RT: 0.00-4.82

AV: 20

| m/z    | Intensity | Relative |
|--------|-----------|----------|
| 415.28 | 0.0       | 0.25     |
| 424.29 | 0.1       | 0.63     |
| 433.26 | 1.3       | 6.96     |
| 434.30 | 0.1       | 0.73     |
| 472.27 | 1.6       | 9.04     |
| 473.30 | 0.3       | 1.79     |
| 572.39 | 0.1       | 0.45     |
| 586.36 | 0.2       | 0.94     |
| 598.34 | 0.2       | 0.94     |
| 628.42 | 0.1       | 0.45     |
| 646.39 | 1.7       | 9.54     |
| 647.45 | 0.3       | 1.56     |
| 648.45 | 0.1       | 0.51     |
| 660.42 | 1.9       | 10.78    |
| 661.41 | 0.4       | 2.14     |
| 667.55 | 0.0       | 0.27     |
| 685.41 | 0.0       | 0.26     |
| 716.49 | 0.0       | 0.24     |
| 760.47 | 0.4       | 2.47     |
| 761.36 | 0.1       | 0.51     |

|         |      |        |
|---------|------|--------|
| 761.54  | 0.0  | 0.26   |
| 799.45  | 1.4  | 7.64   |
| 800.30  | 0.2  | 1.00   |
| 800.52  | 0.3  | 1.58   |
| 801.51  | 0.1  | 0.41   |
| 802.33  | 0.1  | 0.42   |
| 821.49  | 0.0  | 0.26   |
| 831.57  | 0.1  | 0.53   |
| 834.51  | 8.5  | 46.98  |
| 835.51  | 2.9  | 16.06  |
| 836.37  | 0.2  | 0.97   |
| 836.58  | 0.5  | 2.51   |
| 873.51  | 18.0 | 100.00 |
| 874.51  | 5.4  | 30.02  |
| 875.52  | 1.2  | 6.76   |
| 880.47  | 0.0  | 0.27   |
| 882.45  | 0.2  | 1.22   |
| 882.68  | 0.1  | 0.54   |
| 883.50  | 0.1  | 0.48   |
| 952.63  | 0.1  | 0.31   |
| 1077.54 | 0.0  | 0.27   |
| 1079.41 | 0.1  | 0.28   |
| 1079.55 | 0.1  | 0.31   |
| 1095.66 | 0.2  | 1.01   |
| 1126.74 | 0.2  | 1.17   |
| 1127.64 | 0.1  | 0.62   |
| 1253.67 | 0.1  | 0.32   |
| 1283.71 | 3.1  | 17.20  |
| 1284.73 | 2.0  | 11.17  |
| 1285.77 | 0.8  | 4.18   |

SPECTRUM - MS

6-28-13\_HMG62\_1235\_MS5\_1284\_472\_01.raw

ITMS + p ESI E Full ms4 1236.50@cid35.00 1284.40@cid35.00 473.00@cid35.00 [130.00-500.00]

Scan #: 1-50

RT: 0.00-33.10

AV: 50

| m/z    | Intensity | Relative |
|--------|-----------|----------|
| 134.10 | 0.0       | 1.62     |
| 136.83 | 0.0       | 1.46     |
| 184.10 | 0.0       | 1.73     |
| 187.97 | 0.0       | 3.02     |
| 188.10 | 0.0       | 1.54     |
| 192.79 | 0.0       | 1.49     |
| 196.30 | 0.0       | 2.41     |
| 204.13 | 0.0       | 2.95     |
| 215.36 | 0.0       | 1.58     |
| 220.08 | 0.0       | 24.09    |
| 227.10 | 0.1       | 61.21    |
| 228.12 | 0.0       | 3.12     |

|        |     |        |
|--------|-----|--------|
| 234.91 | 0.0 | 3.22   |
| 236.06 | 0.0 | 4.12   |
| 236.21 | 0.0 | 2.20   |
| 245.10 | 0.0 | 28.82  |
| 246.14 | 0.0 | 1.43   |
| 251.84 | 0.0 | 2.82   |
| 260.86 | 0.0 | 2.16   |
| 262.82 | 0.0 | 2.62   |
| 268.15 | 0.1 | 100.00 |
| 269.08 | 0.0 | 1.84   |
| 269.24 | 0.0 | 2.57   |
| 271.48 | 0.0 | 1.43   |
| 287.18 | 0.0 | 4.08   |
| 287.33 | 0.0 | 1.41   |
| 300.67 | 0.0 | 2.03   |
| 315.22 | 0.1 | 67.70  |
| 315.59 | 0.0 | 1.92   |
| 316.19 | 0.0 | 6.48   |
| 327.35 | 0.0 | 3.21   |
| 343.02 | 0.0 | 1.84   |
| 354.61 | 0.0 | 1.76   |
| 355.06 | 0.0 | 2.90   |
| 368.24 | 0.0 | 2.31   |
| 380.27 | 0.0 | 2.18   |
| 398.26 | 0.0 | 20.71  |
| 399.10 | 0.0 | 2.46   |
| 399.25 | 0.0 | 3.54   |
| 422.12 | 0.0 | 1.83   |
| 440.14 | 0.0 | 8.50   |
| 440.33 | 0.0 | 5.56   |
| 441.33 | 0.0 | 1.98   |
| 441.89 | 0.0 | 3.30   |
| 442.18 | 0.0 | 1.53   |
| 442.31 | 0.0 | 1.80   |
| 472.27 | 0.0 | 31.25  |
| 473.25 | 0.0 | 4.93   |
| 476.20 | 0.0 | 2.13   |
| 485.80 | 0.0 | 1.37   |

SPECTRUM - MS

6-28-13\_HMG62\_1235\_MS4\_1284\_834\_01.raw

ITMS + p ESI E Full ms4 1236.50@cid35.00 1284.40@cid35.00 835.00@cid35.00 [225.00-900.00]

Scan #: 1-40

RT: 0.00-8.93

AV: 40

| m/z    | Intensity | Relative |
|--------|-----------|----------|
| 245.12 | 0.0       | 1.29     |
| 271.09 | 0.0       | 0.57     |
| 353.33 | 0.0       | 0.84     |
| 354.34 | 0.0       | 0.72     |

|        |     |        |
|--------|-----|--------|
| 368.31 | 0.0 | 1.33   |
| 383.30 | 0.0 | 1.24   |
| 402.30 | 0.0 | 0.86   |
| 415.27 | 0.2 | 10.30  |
| 416.31 | 0.0 | 1.32   |
| 424.04 | 0.0 | 0.91   |
| 424.25 | 0.0 | 1.02   |
| 424.41 | 0.0 | 0.78   |
| 426.35 | 0.0 | 0.75   |
| 431.33 | 0.0 | 1.30   |
| 433.28 | 1.9 | 100.00 |
| 434.30 | 0.3 | 17.54  |
| 435.30 | 0.0 | 0.62   |
| 442.27 | 0.1 | 5.31   |
| 442.50 | 0.0 | 1.23   |
| 443.33 | 0.0 | 1.01   |
| 572.14 | 0.0 | 0.91   |
| 572.40 | 0.0 | 2.35   |
| 573.25 | 0.0 | 0.99   |
| 573.49 | 0.0 | 0.94   |
| 586.39 | 0.0 | 0.60   |
| 587.43 | 0.0 | 1.05   |
| 621.50 | 0.0 | 0.80   |
| 628.21 | 0.0 | 0.86   |
| 628.35 | 0.0 | 0.88   |
| 646.40 | 0.9 | 46.79  |
| 647.44 | 0.2 | 9.40   |
| 648.26 | 0.0 | 1.24   |
| 648.40 | 0.0 | 1.60   |
| 689.46 | 0.0 | 1.10   |
| 690.45 | 0.0 | 0.93   |
| 760.46 | 0.9 | 46.46  |
| 761.48 | 0.2 | 11.82  |
| 762.47 | 0.0 | 1.10   |
| 763.55 | 0.1 | 3.82   |
| 788.49 | 0.0 | 1.46   |
| 789.43 | 0.0 | 0.88   |
| 792.21 | 0.0 | 1.24   |
| 792.41 | 0.1 | 5.30   |
| 792.58 | 0.1 | 6.02   |
| 793.45 | 0.1 | 3.69   |
| 805.45 | 0.0 | 0.71   |
| 834.45 | 0.2 | 9.82   |
| 834.64 | 0.1 | 7.65   |
| 835.60 | 0.1 | 2.69   |
| 835.79 | 0.0 | 0.95   |

SPECTRUM - MS

6-28-13\_HMG62\_1235\_MS4\_1283\_660\_01.raw

ITMS + p ESI E Full ms4 1236.50@cid35.00 1284.40@cid35.00 661.00@cid35.00 [180.00-700.00]

Scan #: 1-40

RT: 0.00-9.88

AV: 40

| m/z    | Intensity | Relative |
|--------|-----------|----------|
| 208.05 | 0.0       | 0.96     |
| 217.20 | 0.0       | 0.95     |
| 239.43 | 0.0       | 0.94     |
| 245.12 | 0.0       | 1.51     |
| 250.42 | 0.0       | 0.49     |
| 259.03 | 0.0       | 0.94     |
| 313.89 | 0.0       | 0.93     |
| 353.39 | 0.0       | 0.79     |
| 369.74 | 0.0       | 0.91     |
| 380.29 | 0.0       | 0.63     |
| 395.02 | 0.0       | 1.10     |
| 398.06 | 0.0       | 1.25     |
| 398.28 | 0.0       | 1.88     |
| 401.40 | 0.0       | 0.60     |
| 415.14 | 0.0       | 1.91     |
| 415.34 | 0.0       | 10.34    |
| 416.30 | 0.0       | 0.85     |
| 417.34 | 0.0       | 0.86     |
| 431.27 | 0.0       | 5.93     |
| 432.22 | 0.0       | 1.86     |
| 433.29 | 0.5       | 100.00   |
| 434.21 | 0.1       | 11.21    |
| 434.39 | 0.0       | 9.42     |
| 442.98 | 0.0       | 0.56     |
| 472.17 | 0.0       | 3.44     |
| 472.33 | 0.0       | 5.00     |
| 473.06 | 0.0       | 0.59     |
| 473.33 | 0.0       | 1.84     |
| 490.53 | 0.0       | 0.61     |
| 497.31 | 0.0       | 0.59     |
| 514.02 | 0.0       | 0.68     |
| 514.58 | 0.0       | 0.50     |
| 524.09 | 0.0       | 0.56     |
| 558.28 | 0.0       | 1.61     |
| 558.54 | 0.0       | 0.78     |
| 562.49 | 0.0       | 0.87     |
| 568.21 | 0.0       | 1.58     |
| 571.50 | 0.0       | 0.61     |
| 586.35 | 0.2       | 38.10    |
| 587.37 | 0.1       | 15.26    |
| 589.44 | 0.0       | 1.33     |
| 600.40 | 0.0       | 0.72     |
| 614.20 | 0.0       | 1.65     |
| 614.43 | 0.0       | 0.75     |
| 615.48 | 0.0       | 1.80     |
| 618.28 | 0.0       | 4.79     |
| 618.48 | 0.0       | 1.81     |

|        |     |       |
|--------|-----|-------|
| 619.48 | 0.0 | 2.31  |
| 660.38 | 0.0 | 10.82 |
| 661.46 | 0.0 | 3.40  |

SPECTRUM - MS

6-28-13\_HMG62\_1235\_MS5\_1284\_834\_646\_01.raw

ITMS + p ESI E Full ms5 1236.50@cid35.00 1284.40@cid35.00 835.00@cid35.00 647.00@cid35.00  
[175.00-700.00]

Scan #: 1-50

RT: 0.00-26.86

AV: 50

| m/z | Intensity | Relative |
|-----|-----------|----------|
|-----|-----------|----------|

|        |     |        |
|--------|-----|--------|
| 211.09 | 0.0 | 1.51   |
| 218.03 | 0.0 | 1.43   |
| 220.02 | 0.0 | 1.68   |
| 229.14 | 0.0 | 5.20   |
| 236.10 | 0.0 | 2.82   |
| 245.14 | 0.0 | 12.15  |
| 265.63 | 0.0 | 1.69   |
| 269.31 | 0.0 | 1.52   |
| 271.14 | 0.0 | 1.39   |
| 274.24 | 0.0 | 1.53   |
| 276.82 | 0.0 | 1.74   |
| 332.34 | 0.0 | 1.76   |
| 364.19 | 0.0 | 3.37   |
| 368.22 | 0.0 | 4.37   |
| 369.26 | 0.0 | 1.34   |
| 382.19 | 0.0 | 1.38   |
| 384.18 | 0.0 | 2.79   |
| 384.85 | 0.0 | 1.72   |
| 398.21 | 0.0 | 3.12   |
| 398.41 | 0.0 | 2.35   |
| 417.24 | 0.0 | 1.60   |
| 424.31 | 0.0 | 2.93   |
| 426.17 | 0.0 | 3.03   |
| 426.31 | 0.0 | 1.97   |
| 433.28 | 0.1 | 100.00 |
| 434.27 | 0.0 | 13.07  |
| 435.36 | 0.0 | 4.31   |
| 439.09 | 0.0 | 3.28   |
| 439.98 | 0.0 | 1.94   |
| 442.22 | 0.0 | 2.34   |
| 456.13 | 0.0 | 3.83   |
| 458.07 | 0.0 | 1.59   |
| 458.29 | 0.0 | 4.54   |
| 461.46 | 0.0 | 2.70   |
| 482.70 | 0.0 | 1.47   |
| 504.06 | 0.0 | 1.39   |
| 521.18 | 0.0 | 1.92   |
| 544.52 | 0.0 | 1.36   |



|        |     |       |
|--------|-----|-------|
| 571.99 | 0.0 | 2.53  |
| 572.36 | 0.1 | 65.90 |
| 573.19 | 0.0 | 8.66  |
| 573.35 | 0.0 | 18.08 |
| 582.23 | 0.0 | 1.78  |
| 623.90 | 0.0 | 1.66  |
| 625.09 | 0.0 | 3.45  |
| 632.13 | 0.0 | 1.98  |
| 646.34 | 0.0 | 9.93  |
| 646.44 | 0.0 | 7.09  |
| 646.62 | 0.0 | 2.00  |
| 697.05 | 0.0 | 3.07  |

SPECTRUM - MS

6-28-13\_HMG62\_1235\_MS4\_1283\_646\_02.raw

ITMS + p ESI E Full ms4 1236.50@cid35.00 1284.40@cid35.00 647.00@cid35.00 [175.00-700.00]

Scan #: 1-100

RT: 0.00-28.20

AV: 100

m/z Intensity Relative

|        |     |       |
|--------|-----|-------|
| 196.38 | 0.0 | 1.50  |
| 213.36 | 0.0 | 1.39  |
| 227.13 | 0.0 | 11.19 |
| 229.10 | 0.0 | 3.79  |
| 236.12 | 0.0 | 5.51  |
| 245.11 | 0.1 | 29.27 |
| 245.99 | 0.0 | 1.95  |
| 283.14 | 0.0 | 1.42  |
| 315.11 | 0.0 | 4.15  |
| 343.23 | 0.0 | 3.40  |
| 356.67 | 0.0 | 1.42  |
| 363.46 | 0.0 | 1.88  |
| 366.30 | 0.0 | 1.80  |
| 368.47 | 0.0 | 1.81  |
| 371.18 | 0.0 | 1.40  |
| 378.15 | 0.0 | 2.14  |
| 380.26 | 0.0 | 2.73  |
| 382.24 | 0.0 | 8.71  |
| 383.31 | 0.0 | 2.26  |
| 384.23 | 0.0 | 13.37 |
| 384.41 | 0.0 | 2.94  |
| 385.20 | 0.1 | 58.65 |
| 386.06 | 0.0 | 1.53  |
| 386.25 | 0.0 | 6.57  |
| 398.23 | 0.0 | 1.49  |
| 398.41 | 0.0 | 2.28  |
| 424.29 | 0.0 | 4.36  |
| 425.28 | 0.0 | 1.41  |
| 430.65 | 0.0 | 2.25  |
| 433.35 | 0.0 | 15.50 |

|        |     |        |
|--------|-----|--------|
| 434.23 | 0.0 | 2.31   |
| 440.27 | 0.0 | 19.92  |
| 442.30 | 0.1 | 23.89  |
| 442.90 | 0.0 | 1.63   |
| 443.36 | 0.0 | 2.27   |
| 458.28 | 0.0 | 8.74   |
| 459.26 | 0.0 | 1.86   |
| 486.60 | 0.0 | 1.37   |
| 530.26 | 0.0 | 2.27   |
| 558.25 | 0.0 | 1.67   |
| 571.95 | 0.0 | 1.71   |
| 572.35 | 0.2 | 100.00 |
| 573.34 | 0.1 | 32.71  |
| 574.29 | 0.0 | 4.65   |
| 574.56 | 0.0 | 1.44   |
| 575.04 | 0.0 | 1.53   |
| 575.37 | 0.0 | 11.36  |
| 576.35 | 0.0 | 5.84   |
| 604.42 | 0.0 | 2.47   |
| 646.48 | 0.0 | 4.72   |

SPECTRUM - MS

6-28-13\_HMG62\_1235\_MS4\_834\_646\_01.raw

ITMS + p ESI E Full ms4 1236.50@cid35.00 835.00@cid35.00 647.00@cid35.00 [175.00-700.00]

Scan #: 1-50

RT: 0.00-9.22

AV: 50

| m/z    | Intensity | Relative |
|--------|-----------|----------|
| 204.04 | 0.0       | 0.66     |
| 218.01 | 0.1       | 1.67     |
| 219.94 | 0.0       | 0.57     |
| 220.14 | 0.1       | 1.92     |
| 227.14 | 0.1       | 1.20     |
| 229.10 | 0.4       | 9.09     |
| 236.07 | 0.2       | 5.12     |
| 245.11 | 0.6       | 11.65    |
| 246.07 | 0.0       | 0.71     |
| 311.09 | 0.0       | 0.50     |
| 332.17 | 0.0       | 0.84     |
| 350.15 | 0.1       | 1.12     |
| 351.25 | 0.0       | 0.51     |
| 364.22 | 0.3       | 5.25     |
| 365.18 | 0.0       | 0.63     |
| 366.15 | 0.0       | 0.62     |
| 366.39 | 0.0       | 0.58     |
| 368.20 | 0.4       | 7.90     |
| 369.23 | 0.1       | 2.23     |
| 382.16 | 0.1       | 1.77     |
| 382.34 | 0.0       | 0.86     |
| 384.16 | 0.1       | 1.84     |

|        |     |        |
|--------|-----|--------|
| 384.34 | 0.0 | 0.56   |
| 385.11 | 0.0 | 0.87   |
| 385.28 | 0.0 | 0.63   |
| 398.24 | 0.2 | 3.36   |
| 415.25 | 0.1 | 2.47   |
| 417.27 | 0.1 | 2.59   |
| 424.24 | 0.5 | 10.00  |
| 425.21 | 0.1 | 1.51   |
| 426.21 | 0.1 | 3.07   |
| 426.39 | 0.1 | 1.56   |
| 427.25 | 0.1 | 1.15   |
| 433.27 | 4.9 | 100.00 |
| 434.29 | 0.7 | 14.14  |
| 440.34 | 0.1 | 2.48   |
| 442.35 | 0.2 | 3.81   |
| 457.99 | 0.0 | 0.71   |
| 458.27 | 0.3 | 7.03   |
| 459.37 | 0.0 | 0.52   |
| 475.24 | 0.0 | 0.53   |
| 540.13 | 0.0 | 0.53   |
| 540.34 | 0.1 | 1.22   |
| 572.32 | 3.8 | 78.15  |
| 573.34 | 0.9 | 17.44  |
| 575.29 | 0.0 | 1.02   |
| 575.43 | 0.0 | 0.95   |
| 604.41 | 0.0 | 0.67   |
| 646.36 | 0.6 | 12.03  |
| 647.41 | 0.2 | 3.91   |

SPECTRUM - MS

6-28-13\_HMG62\_1235\_MS3\_1109\_01.raw

ITMS + p ESI E Full ms3 1236.50@cid35.00 1110.40@cid35.00 [305.00-1200.00]

Scan #: 1-20

RT: 0.00-9.90

AV: 20

m/z      Intensity      Relative

|        |     |        |
|--------|-----|--------|
| 433.21 | 0.0 | 3.66   |
| 472.29 | 0.6 | 52.84  |
| 473.35 | 0.1 | 7.58   |
| 646.25 | 0.0 | 2.79   |
| 646.49 | 0.0 | 3.16   |
| 660.42 | 1.1 | 100.00 |
| 661.43 | 0.3 | 29.58  |
| 830.54 | 0.0 | 2.84   |
| 873.63 | 0.0 | 2.81   |
| 874.53 | 0.0 | 2.41   |
| 903.55 | 0.6 | 56.08  |
| 904.49 | 0.2 | 16.32  |
| 904.70 | 0.2 | 14.06  |
| 914.47 | 0.0 | 2.53   |

|         |     |      |       |
|---------|-----|------|-------|
| 952.63  | 0.0 | 4.45 |       |
| 964.11  | 0.1 | 5.86 |       |
| 965.04  | 0.0 | 4.33 |       |
| 987.06  | 0.0 | 4.20 |       |
| 987.63  | 0.0 | 3.33 |       |
| 988.25  | 0.0 | 3.31 |       |
| 1042.27 |     | 0.0  | 2.58  |
| 1051.77 |     | 0.1  | 11.75 |
| 1052.37 |     | 0.1  | 6.36  |
| 1067.36 |     | 0.0  | 3.28  |
| 1067.58 |     | 0.0  | 2.92  |
| 1072.63 |     | 0.1  | 6.18  |
| 1073.10 |     | 0.1  | 7.45  |
| 1073.67 |     | 0.1  | 12.79 |
| 1074.16 |     | 0.0  | 2.38  |
| 1077.46 |     | 0.1  | 4.68  |
| 1077.74 |     | 0.1  | 12.72 |
| 1078.44 |     | 0.0  | 2.71  |
| 1078.62 |     | 0.0  | 3.35  |
| 1079.70 |     | 0.1  | 9.44  |
| 1080.13 |     | 0.0  | 2.42  |
| 1080.43 |     | 0.0  | 3.37  |
| 1080.89 |     | 0.0  | 3.90  |
| 1081.11 |     | 0.0  | 4.10  |
| 1081.35 |     | 0.1  | 7.54  |
| 1081.63 |     | 0.0  | 3.52  |
| 1089.21 |     | 0.0  | 3.26  |
| 1090.72 |     | 0.0  | 4.29  |
| 1091.73 |     | 0.0  | 3.33  |
| 1109.57 |     | 0.1  | 11.59 |
| 1109.79 |     | 0.2  | 14.91 |
| 1109.97 |     | 0.1  | 4.74  |
| 1110.32 |     | 0.2  | 21.64 |
| 1110.81 |     | 0.2  | 14.13 |
| 1111.25 |     | 0.1  | 5.15  |
| 1111.78 |     | 0.0  | 2.61  |

SPECTRUM - MS

6-28-13\_HMG62\_1235\_MS4\_1109\_660\_01.raw

ITMS + p ESI E Full ms4 1236.50@cid35.00 1110.40@cid35.00 661.00@cid35.00 [180.00-700.00]

Scan #: 1-112

RT: 0.00-89.52

AV: 112

| m/z    | Intensity | Relative |
|--------|-----------|----------|
| 211.07 | 0.0       | 1.87     |
| 217.54 | 0.0       | 1.23     |
| 227.07 | 0.0       | 1.18     |
| 229.14 | 0.0       | 3.27     |
| 236.16 | 0.0       | 1.96     |
| 241.06 | 0.0       | 1.77     |

|        |     |        |
|--------|-----|--------|
| 259.13 | 0.0 | 27.36  |
| 260.17 | 0.0 | 3.26   |
| 309.07 | 0.0 | 1.21   |
| 329.10 | 0.0 | 1.85   |
| 329.25 | 0.0 | 2.88   |
| 338.26 | 0.0 | 1.89   |
| 359.21 | 0.0 | 1.19   |
| 380.29 | 0.0 | 3.00   |
| 382.22 | 0.0 | 11.27  |
| 384.27 | 0.0 | 3.02   |
| 394.17 | 0.0 | 3.07   |
| 394.37 | 0.0 | 1.91   |
| 398.22 | 0.0 | 4.60   |
| 424.31 | 0.0 | 2.02   |
| 430.31 | 0.0 | 6.62   |
| 431.20 | 0.0 | 1.28   |
| 433.29 | 0.0 | 6.00   |
| 434.27 | 0.0 | 1.28   |
| 442.37 | 0.0 | 1.40   |
| 454.26 | 0.0 | 7.80   |
| 456.28 | 0.0 | 11.78  |
| 457.31 | 0.0 | 2.56   |
| 470.32 | 0.0 | 1.19   |
| 472.29 | 0.1 | 100.00 |
| 473.33 | 0.0 | 12.03  |
| 504.53 | 0.0 | 1.51   |
| 542.39 | 0.0 | 1.63   |
| 556.28 | 0.0 | 1.19   |
| 558.22 | 0.0 | 1.18   |
| 572.27 | 0.0 | 1.25   |
| 584.06 | 0.0 | 1.46   |
| 584.43 | 0.0 | 2.72   |
| 586.36 | 0.0 | 35.28  |
| 587.36 | 0.0 | 5.38   |
| 589.38 | 0.0 | 16.09  |
| 590.46 | 0.0 | 3.01   |
| 614.51 | 0.0 | 2.55   |
| 618.38 | 0.1 | 63.00  |
| 619.36 | 0.0 | 12.01  |
| 630.46 | 0.0 | 1.37   |
| 644.68 | 0.0 | 1.11   |
| 660.42 | 0.0 | 10.85  |
| 661.40 | 0.0 | 1.19   |
| 661.58 | 0.0 | 1.20   |

SPECTRUM - MS

6-28-13\_HMG62\_1235\_MS4\_1109\_472\_01.raw

ITMS + p ESI E Full ms4 1236.50@cid35.00 1110.40@cid35.00 473.00@cid35.00 [130.00-500.00]

Scan #: 1-88

RT: 0.00-56.29

AV: 88

| m/z    | Intensity | Relative |
|--------|-----------|----------|
| 130.78 | 0.0       | 2.82     |
| 148.95 | 0.0       | 3.20     |
| 151.34 | 0.0       | 2.56     |
| 163.07 | 0.0       | 2.68     |
| 169.85 | 0.0       | 4.68     |
| 172.07 | 0.0       | 3.25     |
| 175.86 | 0.0       | 2.91     |
| 180.10 | 0.0       | 4.39     |
| 203.93 | 0.0       | 2.91     |
| 212.77 | 0.0       | 3.30     |
| 216.31 | 0.0       | 3.48     |
| 218.03 | 0.0       | 2.79     |
| 220.09 | 0.0       | 7.51     |
| 220.25 | 0.0       | 2.61     |
| 227.08 | 0.0       | 61.46    |
| 228.14 | 0.0       | 3.65     |
| 236.02 | 0.0       | 5.67     |
| 245.11 | 0.0       | 40.80    |
| 250.44 | 0.0       | 9.49     |
| 255.87 | 0.0       | 2.60     |
| 267.77 | 0.0       | 3.10     |
| 268.14 | 0.0       | 97.24    |
| 268.99 | 0.0       | 4.03     |
| 269.29 | 0.0       | 2.95     |
| 287.14 | 0.0       | 5.07     |
| 312.64 | 0.0       | 3.09     |
| 315.20 | 0.0       | 100.00   |
| 316.18 | 0.0       | 2.94     |
| 321.48 | 0.0       | 3.30     |
| 324.12 | 0.0       | 3.56     |
| 334.16 | 0.0       | 3.38     |
| 346.89 | 0.0       | 3.69     |
| 380.29 | 0.0       | 6.33     |
| 381.97 | 0.0       | 3.12     |
| 391.46 | 0.0       | 4.00     |
| 396.38 | 0.0       | 3.22     |
| 397.05 | 0.0       | 4.69     |
| 398.23 | 0.0       | 5.54     |
| 399.20 | 0.0       | 8.61     |
| 428.55 | 0.0       | 2.57     |
| 430.27 | 0.0       | 28.86    |
| 440.08 | 0.0       | 5.93     |
| 440.24 | 0.0       | 9.00     |
| 441.46 | 0.0       | 3.68     |
| 442.07 | 0.0       | 4.99     |
| 442.30 | 0.0       | 4.39     |
| 472.18 | 0.0       | 8.86     |
| 472.30 | 0.0       | 11.01    |
| 472.44 | 0.0       | 15.26    |

483.40 0.0 2.92

HMG 65 Mass spectral peak lists

SPECTRUM - MS

10-23-13\_HMG65\_1286\_MS2\_01.raw

ITMS + p ESI E Full ms2 1287.00@cid35.00 [350.00-2000.00]

Scan #: 1-20

RT: 0.00-1.79

AV: 20

| m/z     | Intensity | Relative |
|---------|-----------|----------|
| 486.27  | 333.8     | 16.13    |
| 487.28  | 73.6      | 3.56     |
| 724.43  | 86.8      | 4.19     |
| 725.41  | 30.7      | 1.48     |
| 822.97  | 360.0     | 17.40    |
| 823.48  | 300.2     | 14.50    |
| 823.98  | 145.4     | 7.03     |
| 824.47  | 52.8      | 2.55     |
| 921.46  | 40.2      | 1.94     |
| 936.52  | 114.9     | 5.55     |
| 937.02  | 99.8      | 4.82     |
| 937.53  | 57.3      | 2.77     |
| 1054.57 | 2069.8    | 100.00   |
| 1055.06 | 2002.1    | 96.73    |
| 1055.57 | 1163.2    | 56.20    |
| 1056.07 | 495.8     | 23.96    |
| 1056.58 | 161.3     | 7.79     |
| 1092.15 | 31.9      | 1.54     |
| 1131.11 | 66.2      | 3.20     |
| 1131.59 | 79.1      | 3.82     |
| 1132.10 | 45.3      | 2.19     |
| 1150.14 | 45.5      | 2.20     |
| 1159.58 | 67.8      | 3.28     |
| 1160.57 | 39.2      | 1.90     |
| 1168.11 | 420.9     | 20.34    |
| 1168.61 | 445.9     | 21.54    |
| 1169.12 | 293.4     | 14.18    |
| 1169.62 | 131.2     | 6.34     |
| 1170.13 | 86.1      | 4.16     |
| 1177.11 | 32.7      | 1.58     |
| 1177.62 | 31.8      | 1.54     |
| 1187.58 | 88.3      | 4.27     |
| 1188.63 | 47.3      | 2.29     |
| 1217.16 | 41.1      | 1.99     |
| 1218.13 | 54.0      | 2.61     |
| 1219.13 | 48.7      | 2.35     |
| 1228.06 | 61.1      | 2.95     |
| 1285.08 | 67.6      | 3.27     |
| 1285.78 | 378.3     | 18.28    |
| 1286.22 | 695.0     | 33.58    |
| 1286.69 | 883.7     | 42.70    |



|         |       |       |
|---------|-------|-------|
| 1287.15 | 675.3 | 32.63 |
| 1287.67 | 378.8 | 18.30 |
| 1288.14 | 195.6 | 9.45  |
| 1288.69 | 41.2  | 1.99  |
| 1384.68 | 78.1  | 3.77  |
| 1385.69 | 49.5  | 2.39  |
| 1622.85 | 215.3 | 10.40 |
| 1623.85 | 174.6 | 8.43  |
| 1624.86 | 86.7  | 4.19  |

SPECTRUM - MS

10-23-13\_HMG65\_1286\_MS3\_1054\_01.raw

ITMS + p ESI E Full ms3 1287.00@cid35.00 1055.20@cid35.00 [290.00-2000.00]

Scan #: 1-20

RT: 0.00-2.22

AV: 20

m/z Intensity Relative

|         |       |        |  |
|---------|-------|--------|--|
| 486.27  | 167.5 | 34.05  |  |
| 487.27  | 29.0  | 5.88   |  |
| 534.32  | 27.1  | 5.50   |  |
| 535.35  | 5.8   | 1.19   |  |
| 706.38  | 8.6   | 1.75   |  |
| 724.42  | 83.8  | 17.04  |  |
| 725.40  | 23.4  | 4.76   |  |
| 822.97  | 492.0 | 100.00 |  |
| 823.47  | 302.3 | 61.45  |  |
| 823.97  | 116.9 | 23.76  |  |
| 824.47  | 31.6  | 6.42   |  |
| 824.96  | 6.1   | 1.24   |  |
| 855.36  | 7.4   | 1.51   |  |
| 899.48  | 18.5  | 3.77   |  |
| 899.98  | 14.3  | 2.91   |  |
| 900.48  | 6.1   | 1.23   |  |
| 921.47  | 33.0  | 6.71   |  |
| 922.49  | 12.6  | 2.57   |  |
| 936.51  | 83.0  | 16.87  |  |
| 937.03  | 61.4  | 12.48  |  |
| 937.53  | 22.5  | 4.57   |  |
| 938.04  | 9.7   | 1.96   |  |
| 945.51  | 12.1  | 2.47   |  |
| 945.99  | 8.5   | 1.72   |  |
| 969.53  | 7.2   | 1.45   |  |
| 1001.52 | 6.3   | 1.28   |  |
| 1038.55 | 8.0   | 1.62   |  |
| 1039.05 | 6.2   | 1.27   |  |
| 1039.53 | 9.1   | 1.85   |  |
| 1040.04 | 6.6   | 1.34   |  |
| 1054.58 | 107.0 | 21.76  |  |
| 1055.07 | 97.3  | 19.79  |  |
| 1055.57 | 59.6  | 12.11  |  |

|         |       |       |
|---------|-------|-------|
| 1056.07 | 24.6  | 5.00  |
| 1056.57 | 7.8   | 1.58  |
| 1159.59 | 67.4  | 13.70 |
| 1160.60 | 30.6  | 6.21  |
| 1161.60 | 9.2   | 1.87  |
| 1187.63 | 19.4  | 3.95  |
| 1188.61 | 8.7   | 1.77  |
| 1384.70 | 35.4  | 7.19  |
| 1385.69 | 17.3  | 3.52  |
| 1386.70 | 10.3  | 2.09  |
| 1514.72 | 6.8   | 1.39  |
| 1574.74 | 8.6   | 1.74  |
| 1622.85 | 175.5 | 35.67 |
| 1623.86 | 109.3 | 22.21 |
| 1624.97 | 21.3  | 4.32  |
| 1625.88 | 9.5   | 1.93  |
| 1850.04 | 7.3   | 1.48  |

SPECTRUM - MS

10-23-13\_HMG65\_1286\_MS4\_1054\_823\_01.raw

ITMS + p ESI E Full ms4 1287.00@cid35.00 1055.20@cid35.00 823.40@cid35.00 [225.00-2000.00]

Scan #: 1-21

RT: 0.00-4.36

AV: 21

m/z Intensity Relative

|        |      |       |
|--------|------|-------|
| 444.27 | 3.2  | 3.72  |
| 458.23 | 2.9  | 3.45  |
| 486.27 | 68.4 | 80.63 |
| 487.28 | 12.4 | 14.56 |
| 488.28 | 1.4  | 1.68  |
| 514.29 | 1.7  | 2.00  |
| 534.33 | 12.1 | 14.27 |
| 535.32 | 2.5  | 2.98  |
| 591.33 | 7.4  | 8.68  |
| 591.80 | 3.0  | 3.51  |
| 592.32 | 1.1  | 1.31  |
| 616.30 | 1.6  | 1.84  |
| 664.41 | 2.9  | 3.36  |
| 676.36 | 2.9  | 3.41  |
| 704.35 | 3.2  | 3.80  |
| 705.35 | 1.8  | 2.06  |
| 706.40 | 7.6  | 8.90  |
| 707.41 | 2.6  | 3.05  |
| 713.90 | 1.9  | 2.28  |
| 714.39 | 1.8  | 2.16  |
| 724.42 | 32.1 | 37.85 |
| 725.40 | 9.5  | 11.17 |
| 726.41 | 1.6  | 1.85  |
| 746.33 | 2.6  | 3.05  |
| 769.92 | 1.6  | 1.88  |

|         |      |             |
|---------|------|-------------|
| 773.42  | 1.6  | 1.87        |
| 806.94  | 2.7  | 3.23        |
| 807.45  | 1.7  | 1.95        |
| 807.95  | 3.9  | 4.64        |
| 808.45  | 2.7  | 3.18        |
| 822.97  | 37.0 | 43.60       |
| 823.47  | 28.0 | 32.98       |
| 823.97  | 10.7 | 12.56       |
| 824.48  | 2.9  | 3.43        |
| 921.46  | 14.7 | 17.35       |
| 922.48  | 5.3  | 6.26        |
| 923.50  | 1.4  | 1.64        |
| 969.53  | 6.5  | 7.67        |
| 970.53  | 2.6  | 3.06        |
| 981.49  | 1.3  | 1.50        |
| 1051.48 |      | 5.5 6.52    |
| 1052.46 |      | 2.3 2.76    |
| 1111.54 |      | 6.1 7.13    |
| 1112.54 |      | 2.7 3.21    |
| 1159.59 |      | 84.9 100.00 |
| 1160.60 |      | 40.5 47.67  |
| 1161.61 |      | 10.0 11.81  |
| 1187.61 |      | 1.8 2.13    |
| 1622.85 |      | 5.9 6.96    |
| 1623.86 |      | 4.3 5.08    |

SPECTRUM - MS

11-5-13\_HMG65\_1286\_MS3\_486\_02.raw

ITMS + p ESI E Full ms3 1287.00@cid35.00 487.00@cid35.00 [130.00-500.00]

Scan #: 1-100

RT: 0.00-29.37

AV: 100

m/z Intensity Relative

|        |     |       |
|--------|-----|-------|
| 178.04 | 0.1 | 0.33  |
| 180.02 | 0.2 | 0.71  |
| 188.03 | 0.1 | 0.42  |
| 208.07 | 0.3 | 1.14  |
| 211.07 | 0.1 | 0.34  |
| 218.05 | 0.1 | 0.36  |
| 220.07 | 1.0 | 3.57  |
| 221.08 | 0.1 | 0.43  |
| 227.06 | 0.2 | 0.55  |
| 236.06 | 0.1 | 0.29  |
| 241.09 | 1.4 | 5.01  |
| 242.11 | 0.2 | 0.61  |
| 250.08 | 0.4 | 1.60  |
| 252.10 | 0.7 | 2.48  |
| 257.09 | 0.2 | 0.57  |
| 259.10 | 9.8 | 35.82 |
| 260.11 | 1.1 | 3.84  |

|        |      |        |
|--------|------|--------|
| 261.12 | 0.2  | 0.61   |
| 268.12 | 3.2  | 11.56  |
| 269.12 | 0.4  | 1.54   |
| 297.12 | 0.2  | 0.83   |
| 301.11 | 0.3  | 1.24   |
| 314.16 | 0.1  | 0.35   |
| 315.17 | 0.1  | 0.29   |
| 329.18 | 10.1 | 36.83  |
| 330.18 | 1.6  | 5.86   |
| 331.17 | 0.2  | 0.89   |
| 353.17 | 0.1  | 0.48   |
| 382.20 | 0.2  | 0.57   |
| 384.16 | 0.2  | 0.80   |
| 394.22 | 0.1  | 0.40   |
| 410.20 | 0.1  | 0.53   |
| 412.20 | 5.7  | 20.75  |
| 413.21 | 1.2  | 4.41   |
| 414.23 | 0.2  | 0.77   |
| 415.24 | 0.5  | 1.84   |
| 416.24 | 0.1  | 0.45   |
| 426.25 | 0.1  | 0.51   |
| 440.20 | 0.1  | 0.29   |
| 444.25 | 27.4 | 100.00 |
| 445.25 | 6.2  | 22.65  |
| 446.25 | 1.0  | 3.78   |
| 454.25 | 0.4  | 1.31   |
| 455.23 | 0.1  | 0.38   |
| 456.26 | 1.9  | 6.91   |
| 457.26 | 0.5  | 1.78   |
| 458.26 | 0.1  | 0.39   |
| 486.26 | 1.8  | 6.48   |
| 487.27 | 0.4  | 1.52   |
| 488.27 | 0.1  | 0.31   |

SPECTRUM - MS

10-23-13\_HMG65\_1286\_MS3\_1384\_01.raw

ITMS + p ESI E Full ms3 1287.00@cid35.00 1385.40@cid35.00 [380.00-1400.00]

Scan #: 1-20

RT: 0.00-5.15

AV: 20

m/z Intensity Relative

|        |     |       |
|--------|-----|-------|
| 458.22 | 1.6 | 10.01 |
| 459.24 | 0.3 | 1.92  |
| 486.27 | 2.6 | 15.90 |
| 487.27 | 0.4 | 2.45  |
| 534.35 | 0.2 | 1.04  |
| 546.26 | 0.1 | 0.66  |
| 574.32 | 0.2 | 1.47  |
| 620.34 | 0.1 | 0.52  |
| 676.34 | 0.3 | 2.10  |

|         |      |        |       |
|---------|------|--------|-------|
| 677.35  | 0.1  | 0.43   |       |
| 694.24  | 0.1  | 0.49   |       |
| 694.43  | 0.1  | 0.57   |       |
| 703.44  | 0.1  | 0.48   |       |
| 724.42  | 0.3  | 2.17   |       |
| 764.40  | 0.5  | 2.94   |       |
| 765.38  | 0.2  | 1.03   |       |
| 850.42  | 0.1  | 0.46   |       |
| 877.48  | 0.1  | 0.42   |       |
| 879.49  | 0.1  | 0.69   |       |
| 889.40  | 0.2  | 1.07   |       |
| 921.46  | 16.1 | 100.00 |       |
| 922.47  | 5.4  | 33.50  |       |
| 923.49  | 1.1  | 6.98   |       |
| 951.51  | 0.5  | 3.23   |       |
| 1074.49 |      | 0.4    | 2.18  |
| 1075.57 |      | 0.1    | 0.48  |
| 1111.57 |      | 0.1    | 0.49  |
| 1139.65 |      | 0.1    | 0.60  |
| 1140.61 |      | 0.1    | 0.52  |
| 1148.57 |      | 1.5    | 9.40  |
| 1149.65 |      | 0.5    | 3.14  |
| 1150.43 |      | 0.1    | 0.45  |
| 1157.58 |      | 0.3    | 1.64  |
| 1166.35 |      | 0.1    | 0.44  |
| 1166.61 |      | 0.2    | 1.09  |
| 1196.63 |      | 0.2    | 0.96  |
| 1227.62 |      | 1.0    | 6.25  |
| 1228.68 |      | 0.3    | 1.84  |
| 1229.60 |      | 0.1    | 0.42  |
| 1278.64 |      | 0.2    | 0.97  |
| 1312.63 |      | 0.5    | 3.26  |
| 1342.54 |      | 0.1    | 0.84  |
| 1343.64 |      | 0.1    | 0.50  |
| 1352.61 |      | 0.2    | 1.02  |
| 1354.61 |      | 0.1    | 0.58  |
| 1354.76 |      | 0.1    | 0.57  |
| 1355.80 |      | 0.1    | 0.53  |
| 1384.69 |      | 2.5    | 15.45 |
| 1385.69 |      | 1.7    | 10.79 |
| 1386.70 |      | 1.0    | 6.11  |

SPECTRUM - MS

10-23-13\_HMG65\_1286\_MS4\_1384\_921\_01.raw

ITMS + p ESI E Full ms4 1287.00@cid35.00 1385.40@cid35.00 922.00@cid35.00 [250.00-1000.00]

Scan #: 1-50

RT: 0.00-29.17

AV: 50

| m/z | Intensity | Relative |
|-----|-----------|----------|
|-----|-----------|----------|

|        |     |      |
|--------|-----|------|
| 268.10 | 0.0 | 1.23 |
|--------|-----|------|

|        |     |        |
|--------|-----|--------|
| 426.13 | 0.0 | 0.58   |
| 444.24 | 0.1 | 2.88   |
| 445.27 | 0.0 | 0.51   |
| 454.24 | 0.0 | 0.67   |
| 458.23 | 1.9 | 100.00 |
| 459.23 | 0.2 | 11.45  |
| 460.31 | 0.0 | 0.74   |
| 486.26 | 1.6 | 82.70  |
| 487.28 | 0.2 | 10.61  |
| 546.31 | 0.1 | 2.66   |
| 547.21 | 0.0 | 0.54   |
| 574.33 | 0.2 | 8.02   |
| 575.38 | 0.0 | 1.15   |
| 620.30 | 0.1 | 3.72   |
| 621.20 | 0.0 | 0.48   |
| 621.37 | 0.0 | 0.53   |
| 646.32 | 0.0 | 2.07   |
| 655.32 | 0.0 | 0.64   |
| 676.34 | 0.3 | 15.48  |
| 677.34 | 0.1 | 2.96   |
| 692.32 | 0.0 | 1.83   |
| 694.36 | 0.2 | 9.75   |
| 695.41 | 0.0 | 0.91   |
| 703.42 | 0.0 | 1.84   |
| 724.55 | 0.0 | 0.49   |
| 734.39 | 0.0 | 0.51   |
| 752.39 | 0.0 | 0.75   |
| 764.41 | 0.4 | 23.06  |
| 765.39 | 0.1 | 4.61   |
| 815.41 | 0.1 | 3.30   |
| 816.27 | 0.0 | 0.78   |
| 816.41 | 0.0 | 0.49   |
| 816.56 | 0.0 | 0.49   |
| 829.37 | 0.0 | 1.32   |
| 829.55 | 0.0 | 0.83   |
| 847.41 | 0.1 | 6.49   |
| 848.41 | 0.0 | 2.61   |
| 850.45 | 0.1 | 6.33   |
| 851.55 | 0.0 | 1.06   |
| 857.36 | 0.0 | 0.53   |
| 879.42 | 0.1 | 5.07   |
| 880.43 | 0.0 | 1.22   |
| 889.42 | 0.2 | 12.26  |
| 890.42 | 0.1 | 2.67   |
| 891.46 | 0.1 | 3.71   |
| 892.40 | 0.0 | 0.93   |
| 921.47 | 0.3 | 15.89  |
| 922.46 | 0.1 | 5.04   |
| 923.45 | 0.0 | 0.49   |

SPECTRUM - MS

10-23-13\_HMG65\_1286\_MS5\_1384\_921\_486\_01.raw

ITMS + p ESI E Full ms5 1287.00@cid35.00 1385.40@cid35.00 922.00@cid35.00 487.00@cid35.00

[130.00-500.00]

Scan #: 1-51

RT: 0.00-55.35

AV: 51

m/z Intensity Relative

|        |     |        |
|--------|-----|--------|
| 155.09 | 0.0 | 0.19   |
| 179.97 | 0.0 | 0.59   |
| 180.18 | 0.0 | 0.19   |
| 192.18 | 0.0 | 0.37   |
| 199.15 | 0.0 | 0.17   |
| 200.08 | 0.0 | 0.26   |
| 220.10 | 0.0 | 2.14   |
| 227.09 | 0.0 | 0.41   |
| 235.94 | 0.0 | 0.17   |
| 241.09 | 0.0 | 3.44   |
| 242.08 | 0.0 | 0.26   |
| 250.13 | 0.0 | 0.26   |
| 257.09 | 0.0 | 0.18   |
| 259.10 | 0.0 | 13.43  |
| 260.11 | 0.0 | 1.15   |
| 268.11 | 0.0 | 8.41   |
| 269.01 | 0.0 | 0.16   |
| 269.18 | 0.0 | 0.18   |
| 297.22 | 0.0 | 0.23   |
| 301.13 | 0.0 | 1.19   |
| 312.33 | 0.0 | 0.28   |
| 325.07 | 0.0 | 0.17   |
| 329.18 | 0.1 | 25.21  |
| 330.18 | 0.0 | 1.84   |
| 331.14 | 0.0 | 0.32   |
| 353.18 | 0.0 | 1.61   |
| 384.16 | 0.0 | 0.38   |
| 394.18 | 0.0 | 0.54   |
| 410.23 | 0.0 | 0.17   |
| 412.13 | 0.0 | 1.19   |
| 412.31 | 0.0 | 0.72   |
| 413.24 | 0.0 | 0.27   |
| 414.98 | 0.0 | 0.27   |
| 415.18 | 0.0 | 1.75   |
| 415.33 | 0.0 | 0.77   |
| 416.31 | 0.0 | 0.17   |
| 424.35 | 0.0 | 0.27   |
| 431.13 | 0.0 | 0.20   |
| 441.26 | 0.0 | 0.20   |
| 444.25 | 0.2 | 100.00 |
| 445.26 | 0.0 | 15.92  |
| 446.16 | 0.0 | 0.79   |
| 446.39 | 0.0 | 0.34   |

|        |     |       |
|--------|-----|-------|
| 453.97 | 0.0 | 0.20  |
| 454.26 | 0.0 | 0.26  |
| 456.21 | 0.0 | 2.95  |
| 457.25 | 0.0 | 0.19  |
| 486.25 | 0.1 | 29.37 |
| 487.29 | 0.0 | 4.54  |
| 488.24 | 0.0 | 0.55  |

SPECTRUM - MS

10-23-13\_HMG65\_1286\_MS5\_1384\_921\_458\_01.raw

ITMS + p ESI E Full ms5 1287.00@cid35.00 1385.40@cid35.00 922.00@cid35.00 459.00@cid35.00  
[125.00-500.00]

Scan #: 1-50

RT: 0.00-50.04

AV: 50

| m/z | Intensity | Relative |
|-----|-----------|----------|
|-----|-----------|----------|

|        |     |        |
|--------|-----|--------|
| 149.08 | 0.0 | 1.15   |
| 156.95 | 0.0 | 0.43   |
| 177.96 | 0.0 | 0.33   |
| 180.08 | 0.0 | 0.80   |
| 188.04 | 0.0 | 0.81   |
| 189.14 | 0.0 | 0.47   |
| 194.04 | 0.0 | 0.82   |
| 194.16 | 0.0 | 0.32   |
| 204.00 | 0.0 | 3.21   |
| 204.16 | 0.0 | 0.59   |
| 209.59 | 0.0 | 0.44   |
| 213.06 | 0.0 | 13.29  |
| 214.06 | 0.0 | 0.41   |
| 218.10 | 0.0 | 0.95   |
| 220.08 | 0.0 | 7.70   |
| 221.15 | 0.0 | 0.40   |
| 228.10 | 0.0 | 0.35   |
| 231.06 | 0.0 | 15.53  |
| 232.17 | 0.0 | 0.37   |
| 236.06 | 0.0 | 6.84   |
| 237.06 | 0.0 | 0.63   |
| 243.69 | 0.0 | 0.60   |
| 250.12 | 0.0 | 0.90   |
| 268.11 | 0.2 | 100.00 |
| 269.11 | 0.0 | 7.26   |
| 273.05 | 0.0 | 1.06   |
| 301.13 | 0.1 | 24.53  |
| 302.03 | 0.0 | 1.14   |
| 302.19 | 0.0 | 0.63   |
| 310.14 | 0.0 | 0.35   |
| 324.17 | 0.0 | 0.47   |
| 329.24 | 0.0 | 0.64   |
| 336.17 | 0.0 | 0.37   |
| 352.26 | 0.0 | 0.37   |



|        |     |       |
|--------|-----|-------|
| 354.31 | 0.0 | 0.53  |
| 362.15 | 0.0 | 0.33  |
| 366.09 | 0.0 | 0.58  |
| 366.24 | 0.0 | 0.53  |
| 371.25 | 0.0 | 0.34  |
| 384.13 | 0.0 | 5.16  |
| 385.19 | 0.0 | 1.86  |
| 416.24 | 0.0 | 1.44  |
| 426.11 | 0.0 | 4.67  |
| 426.28 | 0.0 | 3.41  |
| 427.18 | 0.0 | 1.29  |
| 427.35 | 0.0 | 0.74  |
| 428.23 | 0.0 | 4.42  |
| 458.22 | 0.0 | 12.83 |
| 459.09 | 0.0 | 0.39  |
| 459.22 | 0.0 | 0.33  |

HMG 66 Mass spectral peak lists

SPECTRUM - MS

11-5-13\_HMG66\_1286\_MS2\_01.raw

ITMS + p ESI E Full ms2 1287.00@cid35.00 [350.00-2000.00]

Scan #: 1-20

RT: 0.00-4.60

AV: 20

| m/z     | Intensity | Relative  |
|---------|-----------|-----------|
| 486.28  | 228.6     | 17.07     |
| 487.29  | 51.1      | 3.82      |
| 534.35  | 15.7      | 1.17      |
| 724.43  | 78.0      | 5.82      |
| 725.40  | 31.0      | 2.32      |
| 822.96  | 167.3     | 12.49     |
| 823.45  | 150.4     | 11.23     |
| 823.96  | 78.4      | 5.85      |
| 824.46  | 32.1      | 2.40      |
| 921.45  | 57.3      | 4.28      |
| 922.47  | 26.6      | 1.99      |
| 1040.54 |           | 15.2 1.14 |
| 1041.06 |           | 13.6 1.02 |
| 1053.53 |           | 13.0 0.97 |
| 1054.01 |           | 19.0 1.42 |
| 1054.56 | 1233.9    | 92.12     |
| 1055.02 | 1339.4    | 100.00    |
| 1055.52 | 769.0     | 57.41     |
| 1056.03 | 328.4     | 24.52     |
| 1056.53 | 105.1     | 7.85      |
| 1057.03 | 20.7      | 1.55      |
| 1159.54 | 29.2      | 2.18      |
| 1160.53 | 18.1      | 1.35      |
| 1170.14 | 14.4      | 1.07      |
| 1177.08 | 26.9      | 2.01      |
| 1177.57 | 33.9      | 2.53      |
| 1178.09 | 24.5      | 1.83      |
| 1187.58 | 155.0     | 11.57     |
| 1188.58 | 91.7      | 6.85      |
| 1189.57 | 38.4      | 2.87      |
| 1228.03 | 14.4      | 1.07      |
| 1233.07 | 14.1      | 1.05      |
| 1233.56 | 16.2      | 1.21      |
| 1270.10 | 21.8      | 1.62      |
| 1270.60 | 26.6      | 1.99      |
| 1271.10 | 25.5      | 1.90      |
| 1271.62 | 17.5      | 1.31      |
| 1286.18 | 153.2     | 11.44     |
| 1286.64 | 235.9     | 17.61     |
| 1287.08 | 155.1     | 11.58     |
| 1287.60 | 85.3      | 6.37      |

|         |       |       |
|---------|-------|-------|
| 1288.09 | 40.5  | 3.02  |
| 1384.62 | 90.2  | 6.73  |
| 1385.63 | 59.2  | 4.42  |
| 1386.62 | 25.6  | 1.91  |
| 1432.69 | 15.8  | 1.18  |
| 1622.77 | 160.3 | 11.97 |
| 1623.77 | 132.9 | 9.92  |
| 1624.77 | 65.7  | 4.90  |
| 1625.78 | 23.3  | 1.74  |

SPECTRUM - MS

11-5-13\_HMG66\_1286\_MS3\_1055\_01.raw

ITMS + p ESI E Full ms3 1287.00@cid35.00 1055.00@cid35.00 [290.00-2000.00]

Scan #: 1-20

RT: 0.00-3.97

AV: 20

| m/z     | Intensity | Relative |
|---------|-----------|----------|
| 444.26  | 25.1      | 2.24     |
| 458.22  | 60.7      | 5.43     |
| 486.27  | 638.6     | 57.12    |
| 487.28  | 142.8     | 12.77    |
| 488.28  | 24.6      | 2.20     |
| 534.33  | 72.1      | 6.45     |
| 605.33  | 21.9      | 1.96     |
| 676.34  | 24.9      | 2.22     |
| 704.34  | 34.6      | 3.10     |
| 706.38  | 43.9      | 3.93     |
| 724.41  | 390.4     | 34.92    |
| 725.40  | 143.9     | 12.87    |
| 726.40  | 35.0      | 3.13     |
| 822.96  | 1118.0    | 100.00   |
| 823.45  | 957.6     | 85.65    |
| 823.96  | 453.2     | 40.54    |
| 824.46  | 135.5     | 12.12    |
| 824.96  | 26.5      | 2.37     |
| 921.45  | 305.8     | 27.35    |
| 922.46  | 133.0     | 11.90    |
| 923.47  | 35.8      | 3.20     |
| 945.50  | 41.8      | 3.73     |
| 945.98  | 41.2      | 3.69     |
| 946.49  | 25.3      | 2.26     |
| 1002.02 | 22.5      | 2.02     |
| 1038.53 | 34.1      | 3.05     |
| 1039.02 | 38.6      | 3.46     |
| 1039.52 | 46.8      | 4.18     |
| 1040.02 | 37.4      | 3.35     |
| 1054.59 | 325.1     | 29.08    |
| 1055.06 | 378.0     | 33.81    |
| 1055.54 | 253.8     | 22.70    |
| 1056.04 | 118.9     | 10.63    |

|         |       |       |
|---------|-------|-------|
| 1056.55 | 38.1  | 3.40  |
| 1159.55 | 155.5 | 13.91 |
| 1160.56 | 94.4  | 8.45  |
| 1161.57 | 34.4  | 3.08  |
| 1187.60 | 346.1 | 30.95 |
| 1188.60 | 206.3 | 18.45 |
| 1189.61 | 79.5  | 7.11  |
| 1384.66 | 128.5 | 11.50 |
| 1385.65 | 89.8  | 8.03  |
| 1386.65 | 34.1  | 3.05  |
| 1432.73 | 33.5  | 3.00  |
| 1433.71 | 24.4  | 2.18  |
| 1514.67 | 29.5  | 2.64  |
| 1622.80 | 628.1 | 56.18 |
| 1623.81 | 518.2 | 46.35 |
| 1624.82 | 248.0 | 22.18 |
| 1625.82 | 72.4  | 6.48  |

SPECTRUM - MS

11-5-13\_HMG66\_1286\_MS4\_1055\_823\_01.raw

ITMS + p ESI E Full ms4 1287.00@cid35.00 1055.00@cid35.00 823.40@cid35.00 [225.00-1800.00]

Scan #: 1-20

RT: 0.00-2.85

AV: 20

m/z Intensity Relative

|        |       |       |
|--------|-------|-------|
| 386.16 | 3.1   | 2.41  |
| 444.26 | 6.7   | 5.21  |
| 458.22 | 24.1  | 18.61 |
| 459.23 | 4.4   | 3.43  |
| 486.26 | 122.1 | 94.46 |
| 487.27 | 25.0  | 19.37 |
| 488.27 | 3.6   | 2.77  |
| 514.26 | 6.2   | 4.80  |
| 534.32 | 9.8   | 7.62  |
| 591.32 | 11.0  | 8.54  |
| 591.80 | 6.4   | 4.97  |
| 605.31 | 14.1  | 10.92 |
| 605.82 | 8.3   | 6.41  |
| 606.32 | 3.1   | 2.42  |
| 616.28 | 7.6   | 5.85  |
| 664.40 | 4.5   | 3.48  |
| 676.34 | 5.0   | 3.84  |
| 704.34 | 17.7  | 13.68 |
| 705.30 | 6.1   | 4.72  |
| 706.37 | 7.0   | 5.44  |
| 713.89 | 4.2   | 3.22  |
| 714.37 | 3.6   | 2.76  |
| 724.41 | 119.3 | 92.33 |
| 725.39 | 39.1  | 30.28 |
| 726.41 | 8.8   | 6.78  |

|         |      |              |
|---------|------|--------------|
| 746.31  | 12.3 | 9.50         |
| 747.30  | 3.7  | 2.89         |
| 806.90  | 5.1  | 3.91         |
| 807.42  | 4.2  | 3.25         |
| 807.93  | 8.3  | 6.45         |
| 808.43  | 5.4  | 4.15         |
| 822.96  | 40.6 | 31.37        |
| 823.45  | 32.8 | 25.35        |
| 823.95  | 15.7 | 12.15        |
| 824.44  | 5.3  | 4.13         |
| 921.44  | 50.2 | 38.85        |
| 922.46  | 21.1 | 16.35        |
| 923.47  | 4.9  | 3.82         |
| 969.49  | 8.3  | 6.42         |
| 970.49  | 4.4  | 3.38         |
| 1051.45 |      | 5.6 4.30     |
| 1159.55 |      | 129.3 100.00 |
| 1160.55 |      | 69.8 54.03   |
| 1161.56 |      | 21.3 16.48   |
| 1162.56 |      | 3.2 2.47     |
| 1187.60 |      | 32.3 24.98   |
| 1188.60 |      | 17.8 13.75   |
| 1189.61 |      | 4.9 3.79     |
| 1622.81 |      | 7.5 5.81     |
| 1623.80 |      | 5.1 3.98     |

SPECTRUM - MS

11-5-13\_HMG66\_1286\_MS5\_1055\_823\_1160\_01.raw

ITMS + p ESI E Full ms5 1287.00@cid35.00 1055.00@cid35.00 823.40@cid35.00 1160.20@cid35.00 [315.00-1200.00]

Scan #: 1-20

RT: 0.00-2.63

AV: 20

m/z Intensity Relative

|        |     |      |
|--------|-----|------|
| 370.11 | 0.0 | 0.06 |
| 384.11 | 0.1 | 0.07 |
| 433.20 | 0.1 | 0.16 |
| 435.25 | 0.6 | 0.83 |
| 436.29 | 0.1 | 0.07 |
| 444.22 | 0.1 | 0.08 |
| 456.37 | 0.1 | 0.11 |
| 458.23 | 0.2 | 0.30 |
| 470.31 | 0.1 | 0.08 |
| 472.27 | 0.1 | 0.14 |
| 474.22 | 0.1 | 0.12 |
| 474.38 | 0.2 | 0.26 |
| 475.34 | 0.1 | 0.11 |
| 486.32 | 0.5 | 0.63 |
| 502.21 | 0.1 | 0.15 |
| 502.35 | 0.1 | 0.15 |

|         |      |          |
|---------|------|----------|
| 516.34  | 0.1  | 0.19     |
| 534.32  | 16.3 | 21.63    |
| 535.33  | 3.7  | 4.86     |
| 536.35  | 0.3  | 0.36     |
| 562.30  | 0.0  | 0.06     |
| 563.37  | 0.1  | 0.07     |
| 590.30  | 0.1  | 0.19     |
| 590.46  | 0.1  | 0.11     |
| 616.28  | 0.0  | 0.07     |
| 620.44  | 0.0  | 0.06     |
| 625.33  | 0.8  | 1.03     |
| 626.43  | 0.1  | 0.07     |
| 676.32  | 0.1  | 0.11     |
| 692.15  | 0.1  | 0.07     |
| 692.40  | 0.1  | 0.10     |
| 723.45  | 0.1  | 0.09     |
| 724.40  | 75.4 | 100.00   |
| 725.39  | 18.9 | 25.05    |
| 726.40  | 2.5  | 3.30     |
| 969.48  | 2.0  | 2.71     |
| 970.43  | 0.5  | 0.62     |
| 970.63  | 0.5  | 0.68     |
| 971.53  | 0.1  | 0.08     |
| 1054.41 |      | 0.1 0.07 |
| 1060.48 |      | 0.2 0.24 |
| 1060.67 |      | 0.1 0.14 |
| 1061.54 |      | 0.1 0.10 |
| 1127.48 |      | 0.2 0.25 |
| 1127.67 |      | 0.1 0.09 |
| 1129.40 |      | 0.1 0.07 |
| 1129.67 |      | 0.1 0.08 |
| 1159.54 |      | 5.7 7.56 |
| 1160.55 |      | 3.0 3.97 |
| 1161.57 |      | 0.7 0.97 |

SPECTRUM - MS

11-5-13\_HMG66\_1286\_MS3\_1384\_01.raw

ITMS + p ESI E Full ms3 1287.00@cid35.00 1385.40@cid35.00 [380.00-1400.00]

Scan #: 1-20

RT: 0.00-5.83

AV: 20

m/z Intensity Relative

|        |     |       |
|--------|-----|-------|
| 444.20 | 0.1 | 0.53  |
| 458.21 | 2.1 | 11.45 |
| 459.25 | 0.3 | 1.74  |
| 486.25 | 2.4 | 13.40 |
| 487.32 | 0.3 | 1.72  |
| 546.17 | 0.1 | 0.62  |
| 546.30 | 0.1 | 0.36  |
| 574.33 | 0.2 | 1.08  |

|         |      |        |
|---------|------|--------|
| 676.39  | 0.3  | 1.55   |
| 677.28  | 0.1  | 0.37   |
| 694.29  | 0.2  | 0.89   |
| 694.47  | 0.1  | 0.34   |
| 695.44  | 0.1  | 0.50   |
| 764.44  | 0.4  | 2.20   |
| 765.37  | 0.1  | 0.72   |
| 815.36  | 0.1  | 0.42   |
| 850.38  | 0.2  | 1.18   |
| 873.43  | 0.1  | 0.32   |
| 879.50  | 0.1  | 0.44   |
| 880.43  | 0.1  | 0.31   |
| 889.48  | 0.1  | 0.47   |
| 891.33  | 0.1  | 0.32   |
| 921.42  | 18.2 | 100.00 |
| 922.44  | 5.6  | 30.95  |
| 923.49  | 0.6  | 3.16   |
| 1074.51 | 0.1  | 0.55   |
| 1139.56 | 0.1  | 0.44   |
| 1157.46 | 0.4  | 2.00   |
| 1158.48 | 0.1  | 0.32   |
| 1166.37 | 0.1  | 0.65   |
| 1166.60 | 0.1  | 0.76   |
| 1187.62 | 0.1  | 0.38   |
| 1227.53 | 1.3  | 7.26   |
| 1228.47 | 0.4  | 2.35   |
| 1228.62 | 0.3  | 1.86   |
| 1228.76 | 0.1  | 0.60   |
| 1229.47 | 0.1  | 0.47   |
| 1278.46 | 0.1  | 0.73   |
| 1278.60 | 0.1  | 0.71   |
| 1279.52 | 0.1  | 0.79   |
| 1313.69 | 0.1  | 0.34   |
| 1342.68 | 0.1  | 0.40   |
| 1343.61 | 0.1  | 0.64   |
| 1352.35 | 0.1  | 0.43   |
| 1352.61 | 0.3  | 1.51   |
| 1354.60 | 0.3  | 1.66   |
| 1355.57 | 0.1  | 0.62   |
| 1384.62 | 1.3  | 7.04   |
| 1385.64 | 1.1  | 5.89   |
| 1386.66 | 0.4  | 2.12   |

SPECTRUM - MS

11-5-13\_HMG66\_1286\_MS4\_1384\_921\_01.raw

ITMS + p ESI E Full ms4 1287.00@cid35.00 1385.40@cid35.00 922.00@cid35.00 [250.00-1000.00]

Scan #: 1-20

RT: 0.00-5.37

AV: 20

m/z Intensity Relative

|        |     |        |
|--------|-----|--------|
| 268.19 | 0.0 | 0.48   |
| 301.12 | 0.0 | 0.56   |
| 329.24 | 0.0 | 0.46   |
| 444.26 | 0.2 | 2.30   |
| 456.23 | 0.0 | 0.45   |
| 458.21 | 7.6 | 100.00 |
| 459.22 | 1.0 | 13.41  |
| 460.23 | 0.1 | 1.41   |
| 486.26 | 4.9 | 64.52  |
| 487.26 | 0.8 | 10.88  |
| 488.28 | 0.1 | 1.15   |
| 546.29 | 0.1 | 1.64   |
| 547.25 | 0.0 | 0.52   |
| 574.31 | 0.5 | 6.28   |
| 575.34 | 0.1 | 1.27   |
| 620.27 | 0.2 | 2.59   |
| 646.25 | 0.1 | 0.83   |
| 646.45 | 0.0 | 0.58   |
| 655.26 | 0.0 | 0.59   |
| 676.32 | 1.1 | 14.65  |
| 677.39 | 0.1 | 1.94   |
| 678.36 | 0.1 | 0.83   |
| 692.32 | 0.1 | 1.47   |
| 694.34 | 0.6 | 8.27   |
| 695.35 | 0.1 | 1.82   |
| 703.36 | 0.1 | 1.65   |
| 704.41 | 0.1 | 0.71   |
| 764.37 | 1.6 | 21.53  |
| 765.35 | 0.5 | 6.28   |
| 766.41 | 0.1 | 0.75   |
| 815.38 | 0.2 | 2.67   |
| 816.38 | 0.1 | 1.35   |
| 829.32 | 0.1 | 0.72   |
| 829.48 | 0.1 | 0.82   |
| 847.43 | 0.2 | 3.07   |
| 848.42 | 0.1 | 1.56   |
| 849.38 | 0.0 | 0.59   |
| 850.39 | 0.4 | 4.90   |
| 851.46 | 0.1 | 1.07   |
| 879.34 | 0.2 | 2.03   |
| 879.54 | 0.1 | 1.81   |
| 880.43 | 0.1 | 1.54   |
| 889.38 | 0.8 | 10.15  |
| 890.33 | 0.1 | 1.19   |
| 890.49 | 0.1 | 1.41   |
| 891.42 | 0.3 | 4.26   |
| 892.43 | 0.1 | 1.36   |
| 921.42 | 2.0 | 26.07  |
| 922.42 | 0.6 | 8.04   |
| 923.49 | 0.1 | 1.49   |



SPECTRUM - MS

11-5-13\_HMG66\_1286\_MS5\_1384\_921\_486\_01.raw

ITMS + p ESI E Full ms5 1287.00@cid35.00 1385.40@cid35.00 922.00@cid35.00 487.00@cid35.00  
[130.00-500.00]

Scan #: 1-50

RT: 0.00-17.47

AV: 50

| m/z | Intensity | Relative |
|-----|-----------|----------|
|-----|-----------|----------|

|        |     |        |
|--------|-----|--------|
| 167.98 | 0.0 | 0.18   |
| 168.11 | 0.0 | 0.18   |
| 184.95 | 0.0 | 0.28   |
| 213.03 | 0.0 | 0.24   |
| 220.09 | 0.0 | 2.89   |
| 221.06 | 0.0 | 0.17   |
| 226.91 | 0.0 | 0.36   |
| 227.13 | 0.0 | 0.22   |
| 236.19 | 0.0 | 0.44   |
| 241.05 | 0.0 | 2.59   |
| 242.25 | 0.0 | 0.17   |
| 243.17 | 0.0 | 0.20   |
| 244.96 | 0.0 | 0.23   |
| 259.11 | 0.1 | 12.24  |
| 260.05 | 0.0 | 0.61   |
| 260.31 | 0.0 | 0.30   |
| 268.10 | 0.1 | 6.80   |
| 269.06 | 0.0 | 0.80   |
| 297.10 | 0.0 | 0.30   |
| 297.23 | 0.0 | 0.29   |
| 301.20 | 0.0 | 0.64   |
| 329.15 | 0.2 | 27.56  |
| 330.05 | 0.0 | 1.33   |
| 330.20 | 0.0 | 1.78   |
| 353.09 | 0.0 | 0.30   |
| 371.25 | 0.0 | 0.19   |
| 382.26 | 0.0 | 0.21   |
| 383.09 | 0.0 | 0.17   |
| 385.29 | 0.0 | 0.21   |
| 394.09 | 0.0 | 0.37   |
| 410.24 | 0.0 | 0.19   |
| 412.21 | 0.0 | 1.09   |
| 415.03 | 0.0 | 0.86   |
| 415.26 | 0.0 | 1.09   |
| 416.25 | 0.0 | 0.94   |
| 426.23 | 0.0 | 0.30   |
| 440.23 | 0.0 | 0.40   |
| 444.24 | 0.8 | 100.00 |
| 445.25 | 0.1 | 15.62  |
| 446.24 | 0.0 | 0.55   |
| 446.37 | 0.0 | 0.28   |
| 454.34 | 0.0 | 0.23   |

|        |     |       |
|--------|-----|-------|
| 455.20 | 0.0 | 0.40  |
| 456.31 | 0.0 | 3.29  |
| 458.09 | 0.0 | 0.35  |
| 458.35 | 0.0 | 0.23  |
| 486.26 | 0.2 | 24.34 |
| 487.35 | 0.0 | 1.66  |
| 488.30 | 0.0 | 0.47  |
| 488.40 | 0.0 | 0.24  |

SPECTRUM - MS

11-5-13\_HMG66\_1286\_MS5\_1384\_921\_458\_01.raw

ITMS + p ESI E Full ms5 1287.00@cid35.00 1385.40@cid35.00 922.00@cid35.00 459.00@cid35.00

[125.00-500.00]

Scan #: 1-50

RT: 0.00-38.75

AV: 50

| m/z | Intensity | Relative |
|-----|-----------|----------|
|-----|-----------|----------|

|        |     |        |
|--------|-----|--------|
| 148.99 | 0.0 | 2.07   |
| 180.13 | 0.0 | 0.61   |
| 181.05 | 0.0 | 0.22   |
| 188.07 | 0.0 | 0.37   |
| 194.04 | 0.0 | 2.30   |
| 195.14 | 0.0 | 0.36   |
| 203.86 | 0.0 | 0.47   |
| 204.05 | 0.0 | 1.43   |
| 206.15 | 0.0 | 0.30   |
| 213.05 | 0.0 | 12.83  |
| 214.06 | 0.0 | 0.69   |
| 219.97 | 0.0 | 3.41   |
| 220.13 | 0.0 | 3.64   |
| 221.03 | 0.0 | 0.33   |
| 231.05 | 0.0 | 11.46  |
| 232.10 | 0.0 | 0.61   |
| 236.06 | 0.0 | 4.31   |
| 237.06 | 0.0 | 0.49   |
| 250.14 | 0.0 | 1.07   |
| 268.11 | 0.4 | 100.00 |
| 269.13 | 0.0 | 8.03   |
| 270.17 | 0.0 | 0.91   |
| 273.04 | 0.0 | 0.56   |
| 284.05 | 0.0 | 0.34   |
| 301.13 | 0.1 | 29.44  |
| 302.13 | 0.0 | 1.97   |
| 313.19 | 0.0 | 0.47   |
| 324.05 | 0.0 | 0.41   |
| 326.13 | 0.0 | 0.33   |
| 353.97 | 0.0 | 0.43   |
| 354.15 | 0.0 | 0.57   |
| 366.21 | 0.0 | 0.35   |
| 371.12 | 0.0 | 0.34   |

|        |     |      |
|--------|-----|------|
| 384.01 | 0.0 | 1.07 |
| 384.20 | 0.0 | 2.52 |
| 385.22 | 0.0 | 1.08 |
| 386.08 | 0.0 | 0.27 |
| 387.27 | 0.0 | 0.42 |
| 396.30 | 0.0 | 0.31 |
| 416.22 | 0.0 | 1.09 |
| 426.18 | 0.0 | 6.67 |
| 427.05 | 0.0 | 0.63 |
| 427.28 | 0.0 | 0.29 |
| 427.90 | 0.0 | 0.23 |
| 428.16 | 0.0 | 2.64 |
| 428.34 | 0.0 | 1.00 |
| 429.15 | 0.0 | 0.49 |
| 458.20 | 0.0 | 9.47 |
| 459.21 | 0.0 | 2.09 |
| 460.18 | 0.0 | 0.27 |

SPECTRUM - MS

11-5-13\_HMG66\_1286\_MS3\_486\_03.raw

ITMS + p ESI E Full ms3 1287.00@cid35.00 487.00@cid35.00 [130.00-500.00]

Scan #: 1-50

RT: 0.00-4.38

AV: 50

m/z Intensity Relative

|        |      |       |
|--------|------|-------|
| 178.02 | 0.2  | 0.19  |
| 180.01 | 0.7  | 0.79  |
| 188.06 | 0.5  | 0.51  |
| 211.10 | 0.2  | 0.20  |
| 213.08 | 0.2  | 0.26  |
| 218.04 | 0.2  | 0.21  |
| 220.07 | 3.5  | 3.84  |
| 221.07 | 0.4  | 0.41  |
| 227.05 | 0.5  | 0.56  |
| 236.07 | 0.2  | 0.27  |
| 241.09 | 4.0  | 4.39  |
| 242.10 | 0.4  | 0.45  |
| 250.12 | 0.2  | 0.24  |
| 257.09 | 0.2  | 0.22  |
| 259.10 | 18.5 | 20.27 |
| 260.11 | 2.0  | 2.18  |
| 261.12 | 0.3  | 0.33  |
| 268.12 | 11.9 | 13.04 |
| 269.12 | 1.5  | 1.68  |
| 297.14 | 0.7  | 0.81  |
| 301.11 | 1.3  | 1.39  |
| 302.14 | 0.2  | 0.21  |
| 315.18 | 0.3  | 0.29  |
| 329.17 | 37.8 | 41.36 |
| 330.18 | 5.9  | 6.48  |

|        |      |        |
|--------|------|--------|
| 331.17 | 0.9  | 1.01   |
| 353.17 | 0.5  | 0.55   |
| 380.19 | 0.2  | 0.27   |
| 382.26 | 0.3  | 0.30   |
| 384.22 | 0.2  | 0.19   |
| 394.22 | 0.5  | 0.56   |
| 410.20 | 0.3  | 0.38   |
| 411.21 | 0.2  | 0.17   |
| 412.19 | 1.7  | 1.89   |
| 413.26 | 0.3  | 0.31   |
| 415.24 | 1.5  | 1.63   |
| 416.24 | 0.5  | 0.54   |
| 426.14 | 0.2  | 0.25   |
| 431.19 | 0.2  | 0.26   |
| 444.25 | 91.3 | 100.00 |
| 445.25 | 20.6 | 22.51  |
| 446.25 | 3.7  | 4.06   |
| 454.23 | 1.1  | 1.15   |
| 455.25 | 0.2  | 0.27   |
| 456.25 | 5.5  | 6.02   |
| 457.26 | 1.5  | 1.63   |
| 458.15 | 0.2  | 0.17   |
| 486.26 | 15.9 | 17.41  |
| 487.26 | 4.0  | 4.43   |
| 488.27 | 0.7  | 0.79   |

HMG 67 Mass spectral peak lists

SPECTRUM - MS

12-16-13\_HMG67\_1286\_MS2\_01.raw

ITMS + p ESI E Full ms2 1287.00@cid35.00 [350.00-2000.00]

Scan #: 1-20

RT: 0.00-1.62

AV: 20

| m/z     | Intensity | Relative |
|---------|-----------|----------|
| 486.33  | 564.8     | 14.72    |
| 487.32  | 115.0     | 3.00     |
| 724.47  | 224.8     | 5.86     |
| 823.02  | 422.2     | 11.00    |
| 823.53  | 335.5     | 8.74     |
| 824.03  | 159.7     | 4.16     |
| 899.55  | 129.6     | 3.38     |
| 900.04  | 117.1     | 3.05     |
| 921.51  | 156.4     | 4.08     |
| 936.56  | 357.6     | 9.32     |
| 937.06  | 319.3     | 8.32     |
| 937.57  | 185.0     | 4.82     |
| 938.10  | 78.3      | 2.04     |
| 1054.63 | 3838.3    | 100.00   |
| 1055.13 | 3655.0    | 95.23    |
| 1055.62 | 1997.9    | 52.05    |
| 1056.13 | 841.4     | 21.92    |
| 1056.62 | 257.3     | 6.70     |
| 1131.15 | 804.5     | 20.96    |
| 1131.66 | 817.7     | 21.30    |
| 1132.16 | 501.9     | 13.08    |
| 1132.66 | 224.4     | 5.85     |
| 1133.15 | 83.3      | 2.17     |
| 1148.60 | 109.3     | 2.85     |
| 1150.29 | 118.1     | 3.08     |
| 1167.20 | 82.5      | 2.15     |
| 1168.17 | 2915.7    | 75.96    |
| 1168.66 | 3063.9    | 79.82    |
| 1169.16 | 1871.4    | 48.76    |
| 1169.67 | 841.1     | 21.91    |
| 1170.17 | 415.1     | 10.81    |
| 1177.16 | 89.7      | 2.34     |
| 1177.67 | 101.3     | 2.64     |
| 1187.70 | 537.9     | 14.01    |
| 1188.69 | 323.4     | 8.43     |
| 1189.65 | 121.2     | 3.16     |
| 1228.18 | 139.6     | 3.64     |
| 1286.25 | 1355.4    | 35.31    |
| 1286.73 | 1649.2    | 42.97    |
| 1287.21 | 1288.2    | 33.56    |
| 1287.72 | 719.3     | 18.74    |

|         |       |       |
|---------|-------|-------|
| 1288.22 | 319.2 | 8.32  |
| 1384.73 | 312.5 | 8.14  |
| 1385.74 | 181.4 | 4.73  |
| 1386.75 | 86.4  | 2.25  |
| 1622.88 | 456.1 | 11.88 |
| 1623.89 | 352.7 | 9.19  |
| 1624.89 | 170.2 | 4.43  |
| 1850.01 | 121.9 | 3.18  |
| 1851.04 | 96.0  | 2.50  |

SPECTRUM - MS

12-16-13\_HMG67\_1286\_MS3\_486\_01.raw

ITMS + p ESI E Full ms3 1287.00@cid35.00 487.00@cid35.00 [130.00-500.00]

Scan #: 1-50

RT: 0.00-4.69

AV: 50

m/z Intensity Relative

|        |      |       |
|--------|------|-------|
| 178.02 | 0.2  | 0.67  |
| 180.02 | 0.3  | 0.82  |
| 208.09 | 1.1  | 3.11  |
| 211.07 | 0.2  | 0.54  |
| 218.09 | 0.2  | 0.51  |
| 220.06 | 1.4  | 4.06  |
| 221.09 | 0.2  | 0.61  |
| 227.01 | 0.1  | 0.40  |
| 241.10 | 2.0  | 5.74  |
| 242.12 | 0.2  | 0.60  |
| 250.06 | 1.0  | 2.69  |
| 250.21 | 0.5  | 1.32  |
| 252.13 | 1.8  | 5.13  |
| 253.14 | 0.1  | 0.39  |
| 257.12 | 0.4  | 1.19  |
| 259.14 | 22.4 | 62.88 |
| 260.13 | 2.3  | 6.43  |
| 261.11 | 0.3  | 0.85  |
| 268.12 | 4.2  | 11.72 |
| 269.09 | 0.4  | 1.10  |
| 269.25 | 0.2  | 0.52  |
| 297.24 | 0.3  | 0.75  |
| 301.14 | 0.6  | 1.81  |
| 329.20 | 13.3 | 37.45 |
| 330.18 | 1.7  | 4.77  |
| 331.22 | 0.2  | 0.53  |
| 338.19 | 0.1  | 0.36  |
| 352.13 | 0.1  | 0.38  |
| 353.21 | 0.2  | 0.67  |
| 380.24 | 0.2  | 0.65  |
| 382.22 | 0.2  | 0.68  |
| 382.43 | 0.1  | 0.35  |
| 384.19 | 0.6  | 1.67  |

|        |      |        |
|--------|------|--------|
| 385.20 | 0.1  | 0.40   |
| 410.27 | 0.2  | 0.52   |
| 412.24 | 16.4 | 46.15  |
| 413.24 | 3.2  | 8.87   |
| 414.26 | 0.3  | 0.94   |
| 415.27 | 0.6  | 1.73   |
| 416.29 | 0.2  | 0.48   |
| 426.38 | 0.1  | 0.36   |
| 444.30 | 35.6 | 100.00 |
| 445.32 | 7.6  | 21.43  |
| 446.27 | 1.1  | 3.01   |
| 454.26 | 0.4  | 1.06   |
| 456.28 | 2.2  | 6.24   |
| 457.31 | 0.5  | 1.45   |
| 486.31 | 11.4 | 32.04  |
| 487.33 | 2.7  | 7.52   |
| 488.28 | 0.4  | 0.99   |

SPECTRUM - MS

12-16-13\_HMG67\_1286\_MS3\_1385\_01.raw

ITMS + p ESI E Full ms3 1287.00@cid35.00 1385.40@cid35.00 [380.00-1400.00]

Scan #: 1-20

RT: 0.00-3.13

AV: 20

| m/z     | Intensity | Relative  |
|---------|-----------|-----------|
| 458.29  | 3.0       | 11.90     |
| 459.27  | 0.5       | 1.97      |
| 486.32  | 2.7       | 10.63     |
| 487.31  | 0.6       | 2.39      |
| 534.44  | 0.2       | 0.62      |
| 546.31  | 0.2       | 0.86      |
| 574.39  | 0.3       | 1.11      |
| 611.30  | 0.1       | 0.50      |
| 676.39  | 0.6       | 2.30      |
| 677.42  | 0.2       | 0.75      |
| 685.44  | 0.4       | 1.42      |
| 694.39  | 0.3       | 1.27      |
| 724.47  | 1.2       | 4.57      |
| 764.45  | 1.1       | 4.41      |
| 765.50  | 0.1       | 0.57      |
| 850.45  | 0.2       | 0.65      |
| 873.23  | 0.1       | 0.52      |
| 873.48  | 0.4       | 1.53      |
| 889.49  | 0.2       | 0.79      |
| 921.50  | 25.5      | 100.00    |
| 922.51  | 9.6       | 37.54     |
| 923.51  | 2.1       | 8.20      |
| 991.55  | 0.5       | 1.88      |
| 992.58  | 0.2       | 0.73      |
| 1074.55 |           | 3.7 14.52 |

|         |      |       |
|---------|------|-------|
| 1075.58 | 1.4  | 5.33  |
| 1076.63 | 0.3  | 1.18  |
| 1139.59 | 0.3  | 1.34  |
| 1148.60 | 15.2 | 59.49 |
| 1149.62 | 7.0  | 27.50 |
| 1150.63 | 2.3  | 8.81  |
| 1157.75 | 0.3  | 1.04  |
| 1158.64 | 0.2  | 0.69  |
| 1166.68 | 0.3  | 1.27  |
| 1167.76 | 0.1  | 0.57  |
| 1187.76 | 0.2  | 0.92  |
| 1188.68 | 0.1  | 0.53  |
| 1215.69 | 0.7  | 2.82  |
| 1216.65 | 0.5  | 1.96  |
| 1217.68 | 0.2  | 0.69  |
| 1227.74 | 1.5  | 5.98  |
| 1228.68 | 1.1  | 4.31  |
| 1229.53 | 0.2  | 0.71  |
| 1229.76 | 0.2  | 0.88  |
| 1352.71 | 0.1  | 0.53  |
| 1354.73 | 0.4  | 1.49  |
| 1355.66 | 0.1  | 0.58  |
| 1384.73 | 7.6  | 29.95 |
| 1385.74 | 6.0  | 23.46 |
| 1386.75 | 2.8  | 11.15 |

SPECTRUM - MS

12-16-13\_HMG67\_1286\_MS4\_1385\_921\_01.raw

ITMS + p ESI E Full ms4 1287.00@cid35.00 1385.40@cid35.00 922.00@cid35.00 [250.00-1000.00]

Scan #: 1-50

RT: 0.00-13.20

AV: 50

m/z Intensity Relative

|        |      |        |
|--------|------|--------|
| 268.11 | 0.1  | 0.85   |
| 301.18 | 0.1  | 0.62   |
| 329.19 | 0.1  | 0.52   |
| 426.22 | 0.1  | 0.44   |
| 444.30 | 0.2  | 1.40   |
| 454.24 | 0.1  | 0.51   |
| 458.28 | 13.6 | 100.00 |
| 459.27 | 1.8  | 13.06  |
| 460.24 | 0.1  | 1.08   |
| 486.31 | 7.1  | 51.99  |
| 487.30 | 1.1  | 7.91   |
| 546.29 | 0.3  | 2.25   |
| 574.35 | 0.7  | 5.47   |
| 575.38 | 0.1  | 1.02   |
| 620.33 | 0.4  | 2.78   |
| 621.32 | 0.1  | 0.44   |
| 646.43 | 0.1  | 0.97   |



|        |     |       |
|--------|-----|-------|
| 655.35 | 0.1 | 0.52  |
| 676.36 | 1.6 | 12.07 |
| 677.36 | 0.3 | 2.01  |
| 685.38 | 0.5 | 3.52  |
| 686.38 | 0.1 | 0.54  |
| 692.44 | 0.2 | 1.20  |
| 694.38 | 1.2 | 8.56  |
| 695.38 | 0.2 | 1.73  |
| 703.34 | 0.2 | 1.59  |
| 703.51 | 0.1 | 1.03  |
| 704.42 | 0.1 | 0.57  |
| 724.44 | 0.3 | 1.92  |
| 725.46 | 0.1 | 0.52  |
| 752.49 | 0.1 | 0.46  |
| 764.41 | 3.1 | 23.02 |
| 765.43 | 0.8 | 5.56  |
| 766.39 | 0.1 | 0.46  |
| 815.42 | 0.3 | 2.17  |
| 816.43 | 0.2 | 1.31  |
| 829.45 | 0.2 | 1.34  |
| 847.43 | 0.5 | 3.72  |
| 848.43 | 0.3 | 1.94  |
| 850.45 | 0.5 | 3.54  |
| 851.58 | 0.1 | 0.46  |
| 879.47 | 0.4 | 2.95  |
| 880.62 | 0.1 | 0.58  |
| 889.43 | 1.1 | 7.82  |
| 890.43 | 0.3 | 1.91  |
| 891.46 | 0.5 | 3.71  |
| 892.46 | 0.1 | 0.73  |
| 921.49 | 2.3 | 17.05 |
| 922.49 | 0.8 | 5.91  |
| 923.52 | 0.1 | 0.90  |

SPECTRUM - MS

12-16-13\_HMG67\_1286\_MS5\_1385\_921\_486\_01.raw

ITMS + p ESI E Full ms5 1287.00@cid35.00 1385.40@cid35.00 922.00@cid35.00 487.00@cid35.00

[130.00-500.00]

Scan #: 1-50

RT: 0.00-27.54

AV: 50

m/z Intensity Relative

|        |     |      |
|--------|-----|------|
| 175.23 | 0.0 | 0.26 |
| 178.04 | 0.0 | 0.45 |
| 180.07 | 0.0 | 0.71 |
| 207.97 | 0.0 | 0.48 |
| 218.14 | 0.0 | 0.61 |
| 220.17 | 0.0 | 2.04 |
| 241.10 | 0.0 | 3.71 |
| 242.11 | 0.0 | 0.74 |

|        |     |        |
|--------|-----|--------|
| 250.02 | 0.0 | 0.28   |
| 252.15 | 0.0 | 0.54   |
| 257.15 | 0.0 | 0.66   |
| 259.13 | 0.1 | 18.16  |
| 260.13 | 0.0 | 0.92   |
| 268.12 | 0.0 | 11.86  |
| 269.11 | 0.0 | 0.99   |
| 293.11 | 0.0 | 0.23   |
| 297.13 | 0.0 | 0.57   |
| 297.25 | 0.0 | 0.23   |
| 301.08 | 0.0 | 0.33   |
| 301.23 | 0.0 | 0.33   |
| 315.15 | 0.0 | 0.24   |
| 329.20 | 0.1 | 32.09  |
| 330.24 | 0.0 | 1.99   |
| 353.23 | 0.0 | 0.39   |
| 367.90 | 0.0 | 0.48   |
| 381.15 | 0.0 | 0.53   |
| 382.29 | 0.0 | 0.96   |
| 394.24 | 0.0 | 0.91   |
| 395.17 | 0.0 | 0.49   |
| 410.24 | 0.0 | 0.45   |
| 412.18 | 0.0 | 4.50   |
| 412.37 | 0.0 | 0.95   |
| 412.86 | 0.0 | 0.22   |
| 413.14 | 0.0 | 0.49   |
| 415.26 | 0.0 | 1.45   |
| 416.20 | 0.0 | 0.37   |
| 416.37 | 0.0 | 0.47   |
| 431.27 | 0.0 | 0.80   |
| 440.22 | 0.0 | 0.28   |
| 444.28 | 0.4 | 100.00 |
| 445.32 | 0.0 | 9.76   |
| 446.15 | 0.0 | 0.32   |
| 446.39 | 0.0 | 0.83   |
| 456.35 | 0.0 | 2.54   |
| 456.98 | 0.0 | 0.25   |
| 457.38 | 0.0 | 0.47   |
| 479.94 | 0.0 | 0.34   |
| 486.30 | 0.1 | 28.58  |
| 487.10 | 0.0 | 0.37   |
| 487.34 | 0.0 | 4.05   |

SPECTRUM - MS

12-16-13\_HMG67\_1286\_MS5\_1385\_921\_458\_01.raw

ITMS + p ESI E Full ms5 1287.00@cid35.00 1385.40@cid35.00 922.00@cid35.00 459.00@cid35.00

[125.00-500.00]

Scan #: 1-50

RT: 0.00-17.47

AV: 50

m/z      Intensity      Relative

|        |     |        |
|--------|-----|--------|
| 143.21 | 0.0 | 1.02   |
| 145.10 | 0.0 | 0.32   |
| 148.93 | 0.0 | 0.62   |
| 156.94 | 0.0 | 0.69   |
| 178.02 | 0.0 | 0.37   |
| 179.99 | 0.0 | 1.63   |
| 194.01 | 0.0 | 0.55   |
| 194.21 | 0.0 | 0.85   |
| 194.98 | 0.0 | 0.34   |
| 203.89 | 0.0 | 0.55   |
| 204.11 | 0.0 | 0.53   |
| 213.04 | 0.1 | 11.30  |
| 214.03 | 0.0 | 0.45   |
| 218.00 | 0.0 | 0.51   |
| 218.14 | 0.0 | 0.35   |
| 220.09 | 0.0 | 4.28   |
| 231.09 | 0.1 | 12.52  |
| 232.15 | 0.0 | 0.58   |
| 236.02 | 0.0 | 3.68   |
| 236.96 | 0.0 | 0.30   |
| 250.03 | 0.0 | 0.44   |
| 258.25 | 0.0 | 0.36   |
| 258.53 | 0.0 | 0.23   |
| 268.12 | 0.9 | 100.00 |
| 269.09 | 0.1 | 8.79   |
| 270.06 | 0.0 | 0.62   |
| 273.07 | 0.0 | 1.30   |
| 273.24 | 0.0 | 1.09   |
| 299.79 | 0.0 | 0.23   |
| 301.16 | 0.2 | 23.65  |
| 302.20 | 0.0 | 1.85   |
| 324.16 | 0.0 | 0.28   |
| 354.19 | 0.0 | 0.52   |
| 366.18 | 0.0 | 0.38   |
| 382.16 | 0.0 | 0.36   |
| 384.08 | 0.0 | 0.95   |
| 384.27 | 0.0 | 1.57   |
| 385.17 | 0.0 | 0.90   |
| 416.28 | 0.0 | 0.56   |
| 426.14 | 0.0 | 1.04   |
| 426.29 | 0.0 | 1.92   |
| 426.45 | 0.0 | 0.92   |
| 427.24 | 0.0 | 0.23   |
| 428.36 | 0.0 | 2.35   |
| 429.14 | 0.0 | 0.26   |
| 429.26 | 0.0 | 0.41   |
| 458.27 | 0.5 | 60.54  |
| 459.30 | 0.1 | 10.77  |
| 459.61 | 0.0 | 0.25   |
| 460.19 | 0.0 | 1.36   |

SPECTRUM - MS

12-16-13\_HMG67\_1286\_MS3\_1054\_01.raw

ITMS + p ESI E Full ms3 1287.00@cid35.00 1055.20@cid35.00 [290.00-2000.00]

Scan #: 1-20

RT: 0.00-3.84

AV: 20

m/z Intensity Relative

|         |       |        |
|---------|-------|--------|
| 458.27  | 14.8  | 5.67   |
| 486.31  | 141.8 | 54.12  |
| 487.30  | 31.8  | 12.12  |
| 534.37  | 12.7  | 4.83   |
| 676.36  | 7.1   | 2.71   |
| 704.36  | 8.2   | 3.13   |
| 706.43  | 12.0  | 4.59   |
| 724.43  | 80.2  | 30.60  |
| 725.44  | 29.7  | 11.33  |
| 822.99  | 262.1 | 100.00 |
| 823.49  | 220.3 | 84.07  |
| 823.99  | 103.0 | 39.31  |
| 824.47  | 31.0  | 11.85  |
| 899.52  | 35.0  | 13.36  |
| 900.00  | 35.0  | 13.36  |
| 900.48  | 18.2  | 6.96   |
| 921.46  | 79.3  | 30.28  |
| 922.48  | 34.7  | 13.26  |
| 923.48  | 9.2   | 3.51   |
| 936.52  | 95.1  | 36.30  |
| 937.03  | 91.5  | 34.91  |
| 937.54  | 47.3  | 18.04  |
| 938.04  | 18.2  | 6.93   |
| 945.53  | 10.7  | 4.09   |
| 946.03  | 10.6  | 4.05   |
| 1038.53 | 8.5   | 3.24   |
| 1039.05 | 9.3   | 3.55   |
| 1039.54 | 9.4   | 3.58   |
| 1040.06 | 7.4   | 2.83   |
| 1054.61 | 62.1  | 23.70  |
| 1055.09 | 75.9  | 28.95  |
| 1055.58 | 48.5  | 18.49  |
| 1056.07 | 22.4  | 8.54   |
| 1159.61 | 34.7  | 13.23  |
| 1160.61 | 21.4  | 8.16   |
| 1161.60 | 6.9   | 2.63   |
| 1187.65 | 100.0 | 38.14  |
| 1188.65 | 60.8  | 23.21  |
| 1189.63 | 20.9  | 7.96   |
| 1384.69 | 24.3  | 9.28   |
| 1385.69 | 16.7  | 6.39   |
| 1386.70 | 8.5   | 3.26   |

|         |       |       |
|---------|-------|-------|
| 1432.75 | 8.9   | 3.41  |
| 1514.72 | 7.7   | 2.93  |
| 1622.83 | 177.5 | 67.73 |
| 1623.84 | 141.3 | 53.93 |
| 1624.85 | 64.3  | 24.55 |
| 1625.85 | 17.6  | 6.72  |
| 1849.95 | 7.9   | 3.02  |
| 1850.96 | 7.0   | 2.67  |

SPECTRUM - MS

12-16-13\_HMG67\_1286\_MS4\_1054\_823\_01.raw

ITMS + p ESI E Full ms4 1287.00@cid35.00 1055.20@cid35.00 823.40@cid35.00 [225.00-2000.00]

Scan #: 1-20

RT: 0.00-3.65

AV: 20

m/z Intensity Relative

|        |      |       |
|--------|------|-------|
| 444.28 | 2.1  | 3.96  |
| 458.26 | 10.8 | 20.30 |
| 459.27 | 1.9  | 3.58  |
| 486.30 | 45.5 | 85.32 |
| 487.30 | 9.1  | 17.16 |
| 514.30 | 2.5  | 4.63  |
| 534.36 | 4.0  | 7.45  |
| 591.32 | 3.9  | 7.31  |
| 591.81 | 2.8  | 5.18  |
| 605.35 | 6.2  | 11.71 |
| 605.85 | 3.7  | 7.02  |
| 606.36 | 1.4  | 2.55  |
| 616.31 | 3.2  | 5.98  |
| 664.41 | 1.8  | 3.30  |
| 676.35 | 2.2  | 4.06  |
| 704.36 | 7.4  | 13.98 |
| 705.36 | 2.9  | 5.40  |
| 706.42 | 3.3  | 6.19  |
| 713.95 | 1.6  | 2.96  |
| 714.42 | 1.4  | 2.53  |
| 724.43 | 47.6 | 89.34 |
| 725.44 | 16.6 | 31.07 |
| 726.44 | 2.8  | 5.21  |
| 727.94 | 1.6  | 3.03  |
| 728.40 | 1.3  | 2.49  |
| 746.35 | 4.8  | 9.06  |
| 747.35 | 1.4  | 2.62  |
| 773.46 | 1.3  | 2.47  |
| 806.95 | 2.0  | 3.75  |
| 807.45 | 1.7  | 3.27  |
| 807.97 | 2.9  | 5.53  |
| 808.46 | 2.0  | 3.68  |
| 822.99 | 15.3 | 28.78 |
| 823.49 | 13.6 | 25.56 |

|         |      |       |        |
|---------|------|-------|--------|
| 823.98  | 6.1  | 11.36 |        |
| 824.47  | 1.9  | 3.59  |        |
| 921.47  | 19.6 | 36.74 |        |
| 922.48  | 8.7  | 16.31 |        |
| 923.46  | 1.7  | 3.25  |        |
| 969.61  | 2.0  | 3.66  |        |
| 970.52  | 1.9  | 3.54  |        |
| 1051.47 |      | 2.3   | 4.40   |
| 1159.60 |      | 53.3  | 100.00 |
| 1160.61 |      | 28.3  | 53.08  |
| 1161.60 |      | 8.0   | 14.94  |
| 1187.66 |      | 16.2  | 30.44  |
| 1188.66 |      | 8.9   | 16.61  |
| 1189.63 |      | 2.7   | 5.15   |
| 1622.82 |      | 3.1   | 5.74   |
| 1623.82 |      | 2.3   | 4.27   |

SPECTRUM - MS

12-16-13\_HMG67\_1286\_MS5\_1054\_823\_1160\_01.raw

ITMS + p ESI E Full ms5 1287.00@cid35.00 1055.20@cid35.00 823.40@cid35.00 1160.40@cid35.00  
[315.00-1200.00]

Scan #: 1-20

RT: 0.00-4.65

AV: 20

| m/z    | Intensity | Relative |
|--------|-----------|----------|
| 384.30 | 0.0       | 0.07     |
| 426.32 | 0.0       | 0.06     |
| 435.23 | 0.4       | 0.51     |
| 435.42 | 0.1       | 0.20     |
| 436.30 | 0.1       | 0.08     |
| 438.24 | 0.0       | 0.05     |
| 444.37 | 0.0       | 0.07     |
| 454.25 | 0.0       | 0.06     |
| 456.37 | 0.1       | 0.10     |
| 458.28 | 0.3       | 0.48     |
| 472.30 | 0.1       | 0.08     |
| 474.31 | 0.1       | 0.20     |
| 475.35 | 0.1       | 0.09     |
| 486.48 | 0.2       | 0.27     |
| 487.39 | 0.0       | 0.05     |
| 502.31 | 0.1       | 0.14     |
| 516.34 | 0.1       | 0.18     |
| 534.36 | 13.4      | 19.43    |
| 535.36 | 2.7       | 3.83     |
| 536.33 | 0.3       | 0.47     |
| 562.31 | 0.1       | 0.14     |
| 578.34 | 0.0       | 0.05     |
| 590.30 | 0.1       | 0.13     |
| 590.47 | 0.1       | 0.08     |
| 591.47 | 0.1       | 0.08     |

|         |      |        |      |
|---------|------|--------|------|
| 625.40  | 0.4  | 0.60   |      |
| 626.34  | 0.1  | 0.14   |      |
| 676.41  | 0.2  | 0.28   |      |
| 682.53  | 0.0  | 0.05   |      |
| 692.50  | 0.1  | 0.18   |      |
| 696.43  | 0.1  | 0.11   |      |
| 706.29  | 0.0  | 0.05   |      |
| 724.42  | 69.2 | 100.00 |      |
| 725.44  | 18.0 | 25.99  |      |
| 726.45  | 2.5  | 3.64   |      |
| 969.52  | 1.6  | 2.38   |      |
| 970.53  | 0.7  | 1.04   |      |
| 971.51  | 0.1  | 0.13   |      |
| 971.66  | 0.1  | 0.08   |      |
| 1053.53 |      | 0.1    | 0.09 |
| 1060.73 |      | 0.1    | 0.10 |
| 1061.57 |      | 0.1    | 0.07 |
| 1127.40 |      | 0.1    | 0.11 |
| 1127.63 |      | 0.2    | 0.29 |
| 1128.65 |      | 0.1    | 0.11 |
| 1129.57 |      | 0.1    | 0.12 |
| 1130.56 |      | 0.0    | 0.07 |
| 1159.59 |      | 6.4    | 9.22 |
| 1160.61 |      | 3.2    | 4.66 |
| 1161.70 |      | 0.6    | 0.87 |

SPECTRUM - MS

7-22-13\_HMG69\_1323\_MS2\_01.raw

ITMS + p ESI E Full ms2 1323.00@cid35.00 [360.00-2000.00]

Scan #: 1-20

RT: 0.00-3.02

AV: 20

| m/z     | Intensity | Relative |
|---------|-----------|----------|
| 433.28  | 702.0     | 10.37    |
| 486.31  | 479.1     | 7.08     |
| 646.39  | 310.2     | 4.58     |
| 660.41  | 434.8     | 6.42     |
| 685.44  | 323.9     | 4.78     |
| 724.49  | 513.5     | 7.58     |
| 779.50  | 439.8     | 6.50     |
| 780.01  | 314.4     | 4.64     |
| 834.51  | 3241.7    | 47.88    |
| 835.51  | 1126.5    | 16.64    |
| 886.04  | 496.4     | 7.33     |
| 886.56  | 504.6     | 7.45     |
| 917.08  | 871.3     | 12.87    |
| 917.58  | 683.3     | 10.09    |
| 1004.14 | 1167.5    | 17.25    |
| 1004.64 | 1033.8    | 15.27    |
| 1005.14 | 506.1     | 7.48     |
| 1091.18 | 5729.7    | 84.64    |
| 1091.68 | 5882.9    | 86.90    |
| 1092.18 | 3120.1    | 46.09    |
| 1092.68 | 538.8     | 7.96     |
| 1109.63 | 683.5     | 10.10    |
| 1110.64 | 344.9     | 5.09     |
| 1117.68 | 2598.9    | 38.39    |
| 1118.18 | 2705.0    | 39.96    |
| 1118.69 | 1522.7    | 22.49    |
| 1204.75 | 938.4     | 13.86    |
| 1205.25 | 1135.6    | 16.77    |
| 1205.75 | 719.5     | 10.63    |
| 1219.72 | 1035.7    | 15.30    |
| 1220.21 | 1196.8    | 17.68    |
| 1220.73 | 802.0     | 11.85    |
| 1228.72 | 376.9     | 5.57     |
| 1229.23 | 461.6     | 6.82     |
| 1229.73 | 320.4     | 4.73     |
| 1322.81 | 5194.0    | 76.72    |
| 1323.28 | 6769.7    | 100.00   |
| 1323.77 | 5221.7    | 77.13    |
| 1324.27 | 1394.6    | 20.60    |
| 1347.79 | 765.0     | 11.30    |
| 1348.80 | 490.1     | 7.24     |



|         |        |       |
|---------|--------|-------|
| 1535.90 | 865.1  | 12.78 |
| 1536.90 | 599.1  | 8.85  |
| 1749.08 | 587.9  | 8.68  |
| 1750.09 | 542.7  | 8.02  |
| 1811.15 | 3351.9 | 49.51 |
| 1812.16 | 2736.3 | 40.42 |
| 1813.17 | 1184.5 | 17.50 |
| 1985.38 | 424.7  | 6.27  |
| 1986.38 | 390.1  | 5.76  |

SPECTRUM - MS

7-23-13\_HMG69\_1323\_MS3\_660\_01.raw

ITMS + p ESI E Full ms3 1323.00@cid35.00 661.00@cid35.00 [180.00-700.00]

Scan #: 1-50

RT: 0.00-5.92

AV: 50

m/z Intensity Relative

|        |      |        |
|--------|------|--------|
| 229.09 | 3.4  | 4.68   |
| 236.07 | 1.9  | 2.62   |
| 241.08 | 2.1  | 2.91   |
| 257.10 | 0.9  | 1.26   |
| 259.10 | 27.5 | 37.59  |
| 260.10 | 2.0  | 2.76   |
| 301.15 | 1.4  | 1.91   |
| 329.18 | 3.4  | 4.63   |
| 350.19 | 1.7  | 2.35   |
| 355.22 | 0.8  | 1.16   |
| 380.17 | 2.0  | 2.75   |
| 381.19 | 0.9  | 1.28   |
| 382.22 | 5.2  | 7.17   |
| 383.21 | 1.5  | 2.12   |
| 384.11 | 0.8  | 1.06   |
| 384.29 | 0.8  | 1.14   |
| 385.23 | 0.9  | 1.27   |
| 394.22 | 3.6  | 4.93   |
| 398.20 | 4.8  | 6.52   |
| 399.22 | 2.2  | 2.99   |
| 412.19 | 2.2  | 3.04   |
| 424.22 | 7.3  | 10.01  |
| 425.18 | 1.0  | 1.34   |
| 430.25 | 4.7  | 6.38   |
| 431.22 | 0.9  | 1.18   |
| 442.24 | 2.2  | 2.95   |
| 447.28 | 2.2  | 3.07   |
| 454.22 | 5.7  | 7.76   |
| 456.24 | 11.6 | 15.85  |
| 457.26 | 1.8  | 2.44   |
| 470.25 | 1.7  | 2.31   |
| 472.24 | 73.1 | 100.00 |
| 473.26 | 13.6 | 18.58  |

|        |      |       |
|--------|------|-------|
| 486.27 | 6.7  | 9.22  |
| 562.31 | 7.9  | 10.83 |
| 563.31 | 1.2  | 1.67  |
| 584.27 | 2.5  | 3.44  |
| 586.30 | 39.7 | 54.27 |
| 587.30 | 9.4  | 12.92 |
| 589.32 | 9.2  | 12.55 |
| 590.33 | 2.0  | 2.71  |
| 597.31 | 2.0  | 2.78  |
| 614.30 | 2.6  | 3.58  |
| 616.34 | 1.2  | 1.64  |
| 618.34 | 41.2 | 56.38 |
| 619.34 | 10.0 | 13.65 |
| 624.32 | 1.2  | 1.64  |
| 630.37 | 1.1  | 1.56  |
| 660.36 | 24.7 | 33.75 |
| 661.37 | 6.9  | 9.45  |

SPECTRUM - MS

7-22-13\_HMG69\_1323\_MS3\_834\_01.raw

ITMS + p ESI E Full ms3 1323.00@cid35.00 835.00@cid35.00 [225.00-900.00]

Scan #: 1-50

RT: 0.00-8.13

AV: 50

| m/z | Intensity | Relative |
|-----|-----------|----------|
|-----|-----------|----------|

|        |       |        |
|--------|-------|--------|
| 245.11 | 5.4   | 1.13   |
| 353.22 | 6.0   | 1.26   |
| 364.23 | 4.8   | 1.02   |
| 368.23 | 4.1   | 0.86   |
| 369.23 | 2.1   | 0.43   |
| 383.24 | 6.7   | 1.41   |
| 384.23 | 2.0   | 0.43   |
| 387.27 | 3.0   | 0.64   |
| 401.25 | 2.0   | 0.42   |
| 415.28 | 39.5  | 8.33   |
| 416.29 | 5.7   | 1.20   |
| 417.31 | 2.2   | 0.46   |
| 424.24 | 7.6   | 1.61   |
| 426.27 | 4.1   | 0.86   |
| 431.25 | 6.7   | 1.40   |
| 433.29 | 474.2 | 100.00 |
| 434.30 | 68.8  | 14.50  |
| 435.31 | 5.1   | 1.07   |
| 442.31 | 26.5  | 5.59   |
| 443.32 | 4.1   | 0.86   |
| 458.28 | 1.9   | 0.41   |
| 558.28 | 2.2   | 0.47   |
| 572.36 | 17.2  | 3.63   |
| 573.36 | 4.6   | 0.97   |
| 586.39 | 7.6   | 1.61   |

|        |       |       |
|--------|-------|-------|
| 604.41 | 2.7   | 0.57  |
| 621.43 | 4.8   | 1.02  |
| 628.39 | 5.4   | 1.13  |
| 630.39 | 2.2   | 0.47  |
| 644.42 | 2.2   | 0.46  |
| 646.41 | 209.7 | 44.21 |
| 647.42 | 49.5  | 10.44 |
| 648.43 | 4.8   | 1.02  |
| 660.40 | 6.1   | 1.29  |
| 689.45 | 8.6   | 1.80  |
| 730.49 | 2.7   | 0.57  |
| 758.47 | 3.8   | 0.80  |
| 760.48 | 196.7 | 41.48 |
| 761.48 | 56.6  | 11.92 |
| 762.48 | 4.6   | 0.98  |
| 763.48 | 14.6  | 3.09  |
| 764.49 | 4.6   | 0.96  |
| 788.48 | 10.1  | 2.14  |
| 789.48 | 2.9   | 0.60  |
| 792.51 | 52.6  | 11.08 |
| 793.52 | 16.3  | 3.43  |
| 804.50 | 3.3   | 0.69  |
| 834.54 | 57.9  | 12.21 |
| 835.54 | 20.0  | 4.22  |
| 836.56 | 3.2   | 0.68  |

SPECTRUM - MS

7-22-13\_HMG69\_1323\_MS4\_834\_646\_01.raw

ITMS + p ESI E Full ms4 1323.00@cid35.00 835.00@cid35.00 647.00@cid35.00 [175.00-700.00]

Scan #: 1-50

RT: 0.00-8.55

AV: 50

m/z Intensity Relative

|        |     |       |
|--------|-----|-------|
| 197.14 | 0.1 | 0.40  |
| 204.04 | 0.2 | 0.70  |
| 218.10 | 0.3 | 1.06  |
| 220.11 | 0.5 | 1.93  |
| 227.11 | 0.2 | 0.91  |
| 229.13 | 2.3 | 8.31  |
| 236.12 | 1.0 | 3.80  |
| 243.15 | 0.1 | 0.42  |
| 245.12 | 3.1 | 11.52 |
| 246.14 | 0.2 | 0.77  |
| 287.14 | 0.1 | 0.48  |
| 295.15 | 0.2 | 0.60  |
| 350.23 | 0.4 | 1.42  |
| 353.20 | 0.1 | 0.52  |
| 364.25 | 1.1 | 4.19  |
| 365.24 | 0.2 | 0.57  |
| 366.17 | 0.2 | 0.62  |

|        |      |        |
|--------|------|--------|
| 368.24 | 1.4  | 5.24   |
| 369.23 | 0.5  | 1.87   |
| 382.22 | 0.6  | 2.28   |
| 382.41 | 0.2  | 0.63   |
| 383.30 | 0.1  | 0.48   |
| 384.30 | 0.3  | 1.25   |
| 385.23 | 0.3  | 0.99   |
| 392.25 | 0.1  | 0.52   |
| 398.36 | 0.6  | 2.17   |
| 415.29 | 0.7  | 2.54   |
| 417.31 | 0.9  | 3.20   |
| 424.27 | 2.5  | 9.04   |
| 425.26 | 0.3  | 1.09   |
| 426.29 | 1.3  | 4.59   |
| 427.28 | 0.1  | 0.41   |
| 433.30 | 27.3 | 100.00 |
| 434.32 | 3.3  | 12.22  |
| 440.28 | 0.8  | 2.94   |
| 442.30 | 1.4  | 5.28   |
| 443.32 | 0.1  | 0.44   |
| 458.29 | 2.0  | 7.36   |
| 459.29 | 0.3  | 1.24   |
| 475.37 | 0.1  | 0.51   |
| 499.25 | 0.1  | 0.44   |
| 540.42 | 0.5  | 1.96   |
| 541.35 | 0.2  | 0.63   |
| 572.37 | 23.2 | 85.02  |
| 573.37 | 4.8  | 17.66  |
| 575.39 | 0.4  | 1.57   |
| 604.45 | 0.4  | 1.61   |
| 614.33 | 0.2  | 0.58   |
| 646.41 | 4.0  | 14.71  |
| 647.43 | 1.2  | 4.39   |

SPECTRUM - MS

7-22-13\_HMG69\_1323\_MS3\_1109\_01.raw

ITMS + p ESI E Full ms3 1323.00@cid35.00 1110.00@cid35.00 [305.00-1200.00]

Scan #: 1-20

RT: 0.00-2.91

AV: 20

m/z Intensity Relative

|        |     |      |
|--------|-----|------|
| 378.27 | 0.3 | 0.24 |
| 382.29 | 0.3 | 0.25 |
| 385.21 | 6.2 | 4.37 |
| 386.30 | 0.3 | 0.25 |
| 398.26 | 0.7 | 0.51 |
| 412.27 | 1.0 | 0.68 |
| 440.25 | 1.6 | 1.11 |
| 442.39 | 0.5 | 0.38 |
| 444.35 | 0.3 | 0.22 |

|         |       |          |
|---------|-------|----------|
| 454.30  | 0.4   | 0.27     |
| 458.29  | 1.0   | 0.73     |
| 470.33  | 0.4   | 0.29     |
| 472.28  | 0.4   | 0.29     |
| 486.31  | 27.4  | 19.39    |
| 487.33  | 4.5   | 3.19     |
| 572.34  | 3.1   | 2.16     |
| 573.36  | 1.0   | 0.74     |
| 575.38  | 2.5   | 1.73     |
| 598.32  | 2.5   | 1.74     |
| 599.35  | 0.5   | 0.33     |
| 604.47  | 0.4   | 0.28     |
| 646.39  | 141.5 | 100.00   |
| 647.40  | 24.5  | 17.34    |
| 660.28  | 0.3   | 0.22     |
| 690.20  | 0.4   | 0.27     |
| 690.42  | 0.9   | 0.65     |
| 708.43  | 7.7   | 5.41     |
| 709.44  | 1.7   | 1.17     |
| 778.53  | 1.0   | 0.68     |
| 799.46  | 10.5  | 7.39     |
| 800.53  | 2.1   | 1.49     |
| 873.52  | 72.1  | 50.94    |
| 874.53  | 19.9  | 14.04    |
| 891.56  | 0.5   | 0.33     |
| 903.62  | 0.7   | 0.48     |
| 905.34  | 0.9   | 0.63     |
| 905.57  | 1.8   | 1.30     |
| 906.42  | 0.4   | 0.30     |
| 906.56  | 0.5   | 0.32     |
| 921.62  | 0.6   | 0.42     |
| 922.60  | 0.4   | 0.25     |
| 1035.48 |       | 0.5 0.38 |
| 1035.69 |       | 0.4 0.31 |
| 1067.66 |       | 1.7 1.18 |
| 1068.53 |       | 0.6 0.42 |
| 1073.64 |       | 1.1 0.77 |
| 1074.10 |       | 0.9 0.63 |
| 1077.52 |       | 0.3 0.24 |
| 1109.63 | 42.8  | 30.23    |
| 1110.64 | 23.1  | 16.35    |

SPECTRUM - MS

7-22-13\_HMG69\_1323\_MS4\_1109\_646\_01.raw

ITMS + p ESI E Full ms4 1323.00@cid35.00 1110.00@cid35.00 647.00@cid35.00 [175.00-700.00]

Scan #: 1-50

RT: 0.00-8.60

AV: 50

m/z Intensity Relative

194.03 0.1 0.76

|        |      |        |
|--------|------|--------|
| 204.03 | 0.3  | 1.70   |
| 211.07 | 0.1  | 0.66   |
| 220.12 | 0.2  | 1.02   |
| 227.10 | 1.6  | 9.78   |
| 228.13 | 0.1  | 0.66   |
| 229.13 | 0.6  | 3.39   |
| 236.11 | 1.1  | 6.41   |
| 243.13 | 0.1  | 0.57   |
| 245.11 | 2.9  | 17.49  |
| 287.07 | 0.1  | 0.80   |
| 315.19 | 0.4  | 2.14   |
| 324.20 | 0.1  | 0.78   |
| 339.19 | 0.1  | 0.59   |
| 343.21 | 0.8  | 5.05   |
| 353.16 | 0.2  | 0.95   |
| 366.23 | 0.3  | 2.02   |
| 367.20 | 0.3  | 1.89   |
| 368.22 | 0.3  | 1.58   |
| 369.26 | 0.2  | 1.21   |
| 371.26 | 0.1  | 0.65   |
| 378.23 | 0.7  | 4.40   |
| 380.25 | 0.6  | 3.69   |
| 382.27 | 0.8  | 4.76   |
| 384.23 | 0.7  | 4.02   |
| 385.22 | 16.6 | 100.00 |
| 386.23 | 1.3  | 7.92   |
| 396.24 | 0.1  | 0.63   |
| 398.25 | 0.2  | 1.44   |
| 408.25 | 0.1  | 0.80   |
| 424.31 | 0.6  | 3.64   |
| 425.22 | 0.1  | 0.68   |
| 433.32 | 0.3  | 1.54   |
| 440.26 | 2.6  | 15.49  |
| 441.26 | 0.4  | 2.13   |
| 442.29 | 2.0  | 12.08  |
| 443.30 | 0.3  | 1.70   |
| 458.28 | 1.3  | 7.91   |
| 459.31 | 0.2  | 1.15   |
| 498.21 | 0.1  | 0.59   |
| 530.38 | 0.2  | 1.16   |
| 572.36 | 8.5  | 51.36  |
| 573.36 | 3.5  | 21.23  |
| 574.30 | 0.1  | 0.70   |
| 574.45 | 0.1  | 0.86   |
| 575.38 | 5.0  | 30.01  |
| 576.41 | 0.9  | 5.19   |
| 604.39 | 1.1  | 6.71   |
| 646.41 | 5.3  | 32.08  |
| 647.42 | 0.9  | 5.29   |

SPECTRUM - MS

7-22-13\_HMG69\_1323\_MS4\_1109\_486\_02.raw

ITMS + p ESI E Full ms4 1323.00@cid35.00 1110.00@cid35.00 487.00@cid35.00 [130.00-500.00]

Scan #: 1-100

RT: 0.00-13.80

AV: 100

m/z Intensity Relative

|        |     |        |
|--------|-----|--------|
| 161.40 | 0.0 | 0.44   |
| 178.15 | 0.0 | 0.60   |
| 188.04 | 0.0 | 0.49   |
| 190.42 | 0.0 | 0.43   |
| 198.14 | 0.0 | 0.61   |
| 208.15 | 0.0 | 2.06   |
| 211.01 | 0.0 | 0.79   |
| 218.29 | 0.0 | 0.51   |
| 220.07 | 0.0 | 2.23   |
| 237.32 | 0.0 | 0.49   |
| 238.03 | 0.0 | 0.74   |
| 241.13 | 0.2 | 8.17   |
| 250.12 | 0.1 | 6.04   |
| 250.99 | 0.0 | 0.44   |
| 251.98 | 0.1 | 2.67   |
| 252.16 | 0.1 | 6.46   |
| 253.15 | 0.0 | 1.40   |
| 257.16 | 0.0 | 2.05   |
| 259.13 | 1.4 | 71.58  |
| 260.12 | 0.1 | 5.53   |
| 267.89 | 0.0 | 0.71   |
| 268.25 | 0.1 | 4.89   |
| 269.20 | 0.0 | 0.48   |
| 286.99 | 0.0 | 0.43   |
| 297.19 | 0.0 | 0.95   |
| 301.19 | 0.0 | 2.27   |
| 329.21 | 0.8 | 39.72  |
| 330.17 | 0.0 | 2.35   |
| 330.42 | 0.0 | 0.56   |
| 338.33 | 0.0 | 0.47   |
| 369.98 | 0.0 | 0.50   |
| 382.24 | 0.0 | 0.96   |
| 384.03 | 0.0 | 0.68   |
| 384.19 | 0.1 | 2.82   |
| 389.26 | 0.0 | 0.53   |
| 394.28 | 0.0 | 0.61   |
| 412.26 | 1.4 | 69.15  |
| 413.30 | 0.1 | 5.07   |
| 415.26 | 0.0 | 1.75   |
| 436.78 | 0.0 | 0.48   |
| 440.40 | 0.0 | 0.50   |
| 442.00 | 0.0 | 0.46   |
| 444.30 | 2.0 | 100.00 |
| 445.30 | 0.3 | 14.71  |

|        |     |       |
|--------|-----|-------|
| 454.36 | 0.0 | 0.43  |
| 456.33 | 0.0 | 1.62  |
| 456.47 | 0.0 | 1.34  |
| 457.26 | 0.0 | 0.67  |
| 486.29 | 0.2 | 12.55 |
| 487.27 | 0.0 | 1.14  |

SPECTRUM - MS

7-23-13\_HMG69\_1323\_MS3\_1004\_01.raw

ITMS + p ESI E Full ms3 1323.00@cid35.00 1004.50@cid35.00 [275.00-2000.00]

Scan #: 1-50

RT: 0.00-10.71

AV: 50

| m/z | Intensity | Relative |
|-----|-----------|----------|
|-----|-----------|----------|

|         |       |           |
|---------|-------|-----------|
| 472.24  | 6.1   | 2.58      |
| 534.33  | 30.1  | 12.80     |
| 535.34  | 6.7   | 2.86      |
| 646.34  | 26.9  | 11.44     |
| 647.35  | 6.8   | 2.91      |
| 660.37  | 148.9 | 63.31     |
| 661.38  | 37.7  | 16.03     |
| 662.39  | 5.7   | 2.41      |
| 664.42  | 5.1   | 2.19      |
| 685.39  | 74.8  | 31.82     |
| 685.90  | 46.7  | 19.85     |
| 686.39  | 13.7  | 5.84      |
| 692.39  | 44.4  | 18.90     |
| 692.90  | 27.7  | 11.78     |
| 693.41  | 7.9   | 3.37      |
| 704.36  | 6.3   | 2.67      |
| 706.40  | 17.5  | 7.46      |
| 707.40  | 5.1   | 2.15      |
| 724.43  | 131.7 | 56.03     |
| 725.41  | 38.0  | 16.16     |
| 726.41  | 6.1   | 2.59      |
| 797.96  | 5.2   | 2.19      |
| 863.98  | 9.4   | 4.00      |
| 864.48  | 8.0   | 3.42      |
| 901.00  | 235.1 | 100.00    |
| 901.50  | 208.9 | 88.85     |
| 902.00  | 92.0  | 39.12     |
| 902.50  | 23.8  | 10.11     |
| 902.99  | 5.2   | 2.21      |
| 910.02  | 15.5  | 6.59      |
| 910.51  | 13.5  | 5.75      |
| 911.00  | 4.9   | 2.07      |
| 954.52  | 4.3   | 1.84      |
| 1004.07 |       | 21.6 9.19 |
| 1004.57 |       | 20.7 8.80 |
| 1005.06 |       | 12.0 5.10 |



|         |       |       |
|---------|-------|-------|
| 1077.55 | 7.4   | 3.16  |
| 1141.58 | 5.7   | 2.44  |
| 1143.62 | 5.0   | 2.14  |
| 1239.58 | 9.1   | 3.86  |
| 1240.59 | 4.9   | 2.09  |
| 1283.64 | 55.0  | 23.38 |
| 1284.65 | 29.1  | 12.37 |
| 1285.66 | 7.2   | 3.05  |
| 1347.71 | 184.1 | 78.29 |
| 1348.72 | 110.9 | 47.16 |
| 1349.72 | 29.7  | 12.65 |
| 1361.70 | 26.4  | 11.24 |
| 1362.71 | 13.9  | 5.93  |
| 1363.72 | 4.5   | 1.92  |

SPECTRUM - MS

7-23-13\_HMG69\_1323\_MS4\_1004\_1283\_01.raw

ITMS + p ESI E Full ms4 1323.00@cid35.00 1004.50@cid35.00 1284.00@cid35.00 [350.00-1300.00]

Scan #: 1-50

RT: 0.00-8.44

AV: 50

m/z Intensity Relative

|         |     |        |
|---------|-----|--------|
| 384.08  | 0.1 | 0.71   |
| 385.12  | 0.0 | 0.56   |
| 385.32  | 0.0 | 0.68   |
| 454.37  | 0.1 | 1.03   |
| 472.25  | 0.2 | 3.06   |
| 572.34  | 0.1 | 1.68   |
| 573.40  | 0.1 | 0.77   |
| 575.34  | 0.2 | 2.16   |
| 586.31  | 0.1 | 1.30   |
| 589.40  | 0.0 | 0.61   |
| 598.26  | 0.0 | 0.65   |
| 602.23  | 0.1 | 0.85   |
| 604.32  | 0.1 | 1.30   |
| 618.37  | 0.1 | 1.08   |
| 632.47  | 0.0 | 0.61   |
| 646.33  | 6.2 | 84.25  |
| 647.34  | 1.1 | 14.99  |
| 660.36  | 7.3 | 100.00 |
| 661.44  | 0.7 | 8.87   |
| 841.49  | 0.0 | 0.59   |
| 842.54  | 0.1 | 0.77   |
| 864.41  | 0.1 | 0.90   |
| 880.61  | 0.1 | 0.75   |
| 882.46  | 0.7 | 9.77   |
| 883.63  | 0.1 | 1.29   |
| 952.48  | 0.1 | 1.44   |
| 952.61  | 0.1 | 1.01   |
| 1003.48 | 0.4 | 6.00   |

|         |     |       |
|---------|-----|-------|
| 1004.50 | 0.1 | 1.44  |
| 1008.79 | 0.1 | 0.72  |
| 1017.50 | 0.1 | 1.16  |
| 1036.46 | 0.1 | 0.68  |
| 1077.54 | 5.4 | 73.45 |
| 1078.55 | 1.8 | 24.50 |
| 1079.56 | 0.3 | 4.75  |
| 1080.29 | 0.1 | 0.82  |
| 1080.59 | 0.1 | 1.88  |
| 1095.67 | 0.1 | 1.96  |
| 1209.67 | 0.0 | 0.62  |
| 1212.62 | 0.1 | 0.89  |
| 1212.77 | 0.1 | 0.81  |
| 1241.45 | 0.1 | 0.76  |
| 1241.58 | 0.0 | 0.60  |
| 1241.75 | 0.1 | 1.31  |
| 1242.69 | 0.1 | 1.04  |
| 1251.49 | 0.0 | 0.57  |
| 1283.60 | 1.1 | 14.32 |
| 1283.81 | 0.4 | 5.28  |
| 1284.68 | 0.3 | 4.76  |
| 1284.82 | 0.2 | 3.36  |

SPECTRUM - MS

7-23-13\_HMG69\_1323\_MS5\_1004\_1283\_646\_02.raw

ITMS + p ESI E Full ms5 1323.00@cid35.00 1004.50@cid35.00 1284.00@cid35.00 647.00@cid35.00  
[175.00-700.00]

Scan #: 1-116

RT: 0.00-24.60

AV: 116

| m/z    | Intensity | Relative |
|--------|-----------|----------|
| 193.97 | 0.0       | 0.98     |
| 203.98 | 0.0       | 2.02     |
| 227.10 | 0.1       | 11.51    |
| 229.03 | 0.0       | 3.31     |
| 236.04 | 0.0       | 3.66     |
| 236.18 | 0.0       | 3.02     |
| 245.09 | 0.1       | 20.40    |
| 292.24 | 0.0       | 1.02     |
| 315.21 | 0.0       | 1.94     |
| 343.18 | 0.0       | 3.07     |
| 343.95 | 0.0       | 1.14     |
| 344.11 | 0.0       | 0.85     |
| 366.09 | 0.0       | 0.90     |
| 367.18 | 0.0       | 1.72     |
| 368.04 | 0.0       | 0.88     |
| 368.25 | 0.0       | 1.23     |
| 371.20 | 0.0       | 1.14     |
| 378.16 | 0.0       | 3.69     |
| 378.42 | 0.0       | 1.13     |

|        |     |        |
|--------|-----|--------|
| 380.21 | 0.0 | 1.95   |
| 380.33 | 0.0 | 1.29   |
| 382.25 | 0.0 | 1.46   |
| 384.21 | 0.0 | 4.81   |
| 385.19 | 0.5 | 100.00 |
| 386.20 | 0.0 | 8.06   |
| 398.11 | 0.0 | 1.29   |
| 408.19 | 0.0 | 1.61   |
| 412.32 | 0.0 | 2.52   |
| 424.23 | 0.0 | 5.56   |
| 440.03 | 0.0 | 2.69   |
| 440.28 | 0.0 | 6.84   |
| 440.98 | 0.0 | 1.76   |
| 441.31 | 0.0 | 1.10   |
| 442.09 | 0.0 | 2.43   |
| 442.29 | 0.0 | 8.43   |
| 458.27 | 0.0 | 4.44   |
| 492.54 | 0.0 | 1.35   |
| 499.16 | 0.0 | 1.02   |
| 572.32 | 0.2 | 41.30  |
| 573.31 | 0.1 | 20.00  |
| 574.31 | 0.0 | 1.44   |
| 574.47 | 0.0 | 1.20   |
| 575.40 | 0.1 | 21.05  |
| 576.32 | 0.0 | 2.22   |
| 576.51 | 0.0 | 0.92   |
| 604.34 | 0.0 | 6.76   |
| 604.57 | 0.0 | 1.23   |
| 646.14 | 0.0 | 1.40   |
| 646.37 | 0.0 | 7.06   |
| 647.40 | 0.0 | 3.14   |

SPECTRUM - MS

7-23-13\_HMG69\_1323\_MS5\_1004\_1283\_660\_02.raw

ITMS + p ESI E Full ms5 1323.00@cid35.00 1004.50@cid35.00 1284.00@cid35.00 661.00@cid35.00  
[180.00-700.00]

Scan #: 1-100

RT: 0.00-19.59

AV: 100

m/z Intensity Relative

|        |     |       |
|--------|-----|-------|
| 218.12 | 0.0 | 1.29  |
| 229.17 | 0.0 | 3.14  |
| 241.09 | 0.0 | 3.49  |
| 241.29 | 0.0 | 1.17  |
| 259.12 | 0.2 | 29.81 |
| 301.16 | 0.0 | 1.55  |
| 329.14 | 0.0 | 1.36  |
| 329.32 | 0.0 | 1.20  |
| 330.26 | 0.0 | 1.25  |
| 332.11 | 0.0 | 1.34  |

|        |     |        |
|--------|-----|--------|
| 368.36 | 0.0 | 1.31   |
| 371.10 | 0.0 | 1.26   |
| 371.29 | 0.0 | 1.20   |
| 380.23 | 0.0 | 3.60   |
| 382.22 | 0.0 | 6.41   |
| 382.37 | 0.0 | 2.88   |
| 383.31 | 0.0 | 1.83   |
| 384.18 | 0.0 | 5.03   |
| 394.10 | 0.0 | 1.23   |
| 394.29 | 0.0 | 4.20   |
| 398.12 | 0.0 | 4.89   |
| 424.19 | 0.0 | 2.78   |
| 430.24 | 0.0 | 8.59   |
| 430.45 | 0.0 | 1.38   |
| 431.25 | 0.0 | 1.51   |
| 442.31 | 0.0 | 1.33   |
| 447.26 | 0.0 | 1.71   |
| 454.20 | 0.0 | 3.67   |
| 456.16 | 0.0 | 7.56   |
| 456.35 | 0.0 | 4.31   |
| 457.34 | 0.0 | 1.74   |
| 470.26 | 0.0 | 2.49   |
| 472.25 | 0.6 | 100.00 |
| 473.26 | 0.1 | 10.87  |
| 540.28 | 0.0 | 1.21   |
| 584.41 | 0.0 | 2.30   |
| 586.23 | 0.2 | 28.30  |
| 586.45 | 0.1 | 21.31  |
| 587.28 | 0.1 | 9.64   |
| 588.36 | 0.0 | 2.43   |
| 589.27 | 0.1 | 15.25  |
| 614.14 | 0.0 | 1.91   |
| 614.30 | 0.0 | 3.68   |
| 618.36 | 0.3 | 58.54  |
| 619.38 | 0.0 | 6.31   |
| 619.56 | 0.0 | 3.39   |
| 628.36 | 0.0 | 2.06   |
| 628.50 | 0.0 | 1.68   |
| 660.42 | 0.0 | 5.58   |
| 661.38 | 0.0 | 3.31   |

HMG 76 Mass spectral peak lists

SPECTRUM - MS

7-23-13\_HMG76\_981\_MS2\_01.raw

ITMS + p ESI E Full ms2 981.80@cid35.00 [270.00-2000.00]

Scan #: 1-20

RT: 0.00-1.73

AV: 20

| m/z     | Intensity | Relative |
|---------|-----------|----------|
| 486.28  | 2145.7    | 31.12    |
| 487.29  | 446.1     | 6.47     |
| 646.36  | 169.7     | 2.46     |
| 685.41  | 245.5     | 3.56     |
| 826.82  | 2743.6    | 39.79    |
| 827.15  | 3682.8    | 53.42    |
| 827.48  | 2291.5    | 33.24    |
| 827.83  | 1119.7    | 16.24    |
| 828.23  | 389.9     | 5.66     |
| 902.52  | 504.7     | 7.32     |
| 902.86  | 746.7     | 10.83    |
| 903.19  | 452.0     | 6.56     |
| 903.52  | 312.6     | 4.53     |
| 912.52  | 178.6     | 2.59     |
| 912.85  | 262.9     | 3.81     |
| 913.20  | 177.9     | 2.58     |
| 917.05  | 980.9     | 14.23    |
| 917.54  | 836.0     | 12.13    |
| 918.05  | 418.1     | 6.06     |
| 918.54  | 249.8     | 3.62     |
| 918.88  | 190.5     | 2.76     |
| 981.26  | 1326.4    | 19.24    |
| 981.58  | 2349.2    | 34.07    |
| 981.90  | 1544.6    | 22.40    |
| 982.22  | 986.4     | 14.31    |
| 982.58  | 523.6     | 7.60     |
| 997.08  | 438.7     | 6.36     |
| 997.59  | 451.7     | 6.55     |
| 998.09  | 249.4     | 3.62     |
| 1109.58 | 630.1     | 9.14     |
| 1110.60 | 633.3     | 9.18     |
| 1111.14 | 361.6     | 5.24     |
| 1111.63 | 295.7     | 4.29     |
| 1174.60 | 398.0     | 5.77     |
| 1175.11 | 459.8     | 6.67     |
| 1175.61 | 307.9     | 4.47     |
| 1228.69 | 5624.0    | 81.57    |
| 1229.18 | 6894.6    | 100.00   |
| 1229.68 | 4062.3    | 58.92    |
| 1230.19 | 1977.5    | 28.68    |
| 1230.69 | 528.1     | 7.66     |

|         |        |       |
|---------|--------|-------|
| 1342.24 | 1421.7 | 20.62 |
| 1342.74 | 1974.2 | 28.63 |
| 1343.24 | 1236.9 | 17.94 |
| 1343.75 | 631.1  | 9.15  |
| 1344.26 | 191.1  | 2.77  |
| 1460.30 | 607.4  | 8.81  |
| 1460.80 | 957.2  | 13.88 |
| 1461.31 | 644.4  | 9.35  |
| 1461.80 | 387.7  | 5.62  |

SPECTRUM - MS

7-23-13\_HMG76\_981\_MS3\_1229\_01.raw

ITMS + p ESI E Full ms3 981.80@cid35.00 1229.00@cid35.00 [335.00-2000.00]

Scan #: 1-50

RT: 0.00-4.77

AV: 50

m/z Intensity Relative

|         |        |        |
|---------|--------|--------|
| 486.29  | 78.4   | 7.23   |
| 646.36  | 148.5  | 13.69  |
| 647.37  | 34.8   | 3.21   |
| 685.41  | 150.5  | 13.88  |
| 685.92  | 88.0   | 8.11   |
| 686.43  | 27.1   | 2.50   |
| 706.43  | 19.1   | 1.76   |
| 724.45  | 45.2   | 4.17   |
| 798.96  | 16.5   | 1.52   |
| 894.02  | 73.6   | 6.79   |
| 894.52  | 64.4   | 5.94   |
| 895.02  | 45.8   | 4.22   |
| 895.53  | 20.6   | 1.90   |
| 917.05  | 205.6  | 18.96  |
| 917.56  | 157.6  | 14.54  |
| 918.05  | 62.3   | 5.75   |
| 997.10  | 1084.3 | 100.00 |
| 997.60  | 889.3  | 82.02  |
| 998.10  | 407.1  | 37.54  |
| 998.59  | 101.6  | 9.37   |
| 1073.60 | 31.2   | 2.88   |
| 1074.08 | 25.5   | 2.35   |
| 1074.57 | 14.4   | 1.33   |
| 1109.59 | 51.2   | 4.72   |
| 1110.63 | 242.7  | 22.39  |
| 1111.14 | 205.0  | 18.91  |
| 1111.65 | 118.3  | 10.91  |
| 1112.15 | 30.1   | 2.77   |
| 1125.64 | 142.0  | 13.10  |
| 1126.13 | 123.6  | 11.39  |
| 1126.62 | 98.1   | 9.04   |
| 1127.13 | 36.1   | 3.32   |
| 1134.64 | 28.4   | 2.62   |

|         |       |       |
|---------|-------|-------|
| 1135.13 | 27.7  | 2.55  |
| 1228.68 | 150.7 | 13.89 |
| 1229.17 | 182.1 | 16.80 |
| 1229.69 | 119.4 | 11.01 |
| 1230.21 | 42.4  | 3.91  |
| 1347.75 | 212.8 | 19.63 |
| 1348.75 | 126.3 | 11.65 |
| 1349.78 | 38.9  | 3.59  |
| 1574.87 | 15.9  | 1.47  |
| 1765.02 | 21.2  | 1.96  |
| 1766.05 | 14.5  | 1.34  |
| 1811.08 | 105.3 | 9.71  |
| 1812.09 | 75.1  | 6.93  |
| 1813.11 | 29.7  | 2.73  |
| 1971.27 | 138.8 | 12.80 |
| 1972.29 | 109.1 | 10.06 |
| 1973.30 | 47.6  | 4.39  |

SPECTRUM - MS

7-23-13\_HMG76\_981\_MS4\_1229\_997\_01.raw

ITMS + p ESI E Full ms4 981.80@cid35.00 1229.00@cid35.00 997.50@cid35.00 [270.00-2000.00]

Scan #: 1-51

RT: 0.00-5.33

AV: 51

m/z Intensity Relative

|        |       |       |
|--------|-------|-------|
| 385.19 | 3.2   | 2.15  |
| 440.23 | 2.4   | 1.64  |
| 458.26 | 2.6   | 1.76  |
| 514.28 | 2.5   | 1.66  |
| 534.39 | 5.9   | 3.95  |
| 572.32 | 1.9   | 1.30  |
| 582.36 | 4.8   | 3.21  |
| 582.91 | 1.9   | 1.30  |
| 591.35 | 1.5   | 1.02  |
| 616.30 | 2.4   | 1.64  |
| 646.38 | 90.9  | 61.02 |
| 647.48 | 9.5   | 6.37  |
| 648.43 | 1.9   | 1.29  |
| 664.44 | 4.3   | 2.91  |
| 685.43 | 121.1 | 81.35 |
| 685.94 | 48.4  | 32.49 |
| 686.22 | 1.9   | 1.29  |
| 686.44 | 12.2  | 8.18  |
| 704.40 | 5.5   | 3.69  |
| 706.43 | 12.7  | 8.54  |
| 707.47 | 2.8   | 1.87  |
| 724.46 | 18.9  | 12.72 |
| 725.45 | 5.1   | 3.45  |
| 746.38 | 4.5   | 3.00  |
| 791.03 | 1.7   | 1.15  |

|         |      |              |
|---------|------|--------------|
| 791.95  | 6.1  | 4.11         |
| 792.47  | 3.0  | 2.01         |
| 857.02  | 6.2  | 4.13         |
| 886.03  | 3.5  | 2.36         |
| 894.04  | 95.6 | 64.18        |
| 894.54  | 53.8 | 36.16        |
| 895.05  | 36.0 | 24.20        |
| 895.54  | 16.0 | 10.73        |
| 896.07  | 3.6  | 2.40         |
| 903.03  | 10.9 | 7.32         |
| 903.52  | 4.1  | 2.78         |
| 904.06  | 1.9  | 1.30         |
| 947.55  | 2.1  | 1.44         |
| 997.12  | 40.2 | 27.02        |
| 997.60  | 34.2 | 22.95        |
| 998.10  | 16.0 | 10.72        |
| 1141.64 |      | 6.8 4.59     |
| 1143.68 |      | 2.2 1.47     |
| 1239.62 |      | 8.0 5.35     |
| 1240.63 |      | 2.5 1.69     |
| 1347.78 |      | 148.9 100.00 |
| 1348.79 |      | 58.5 39.29   |
| 1349.78 |      | 11.2 7.50    |
| 1766.13 |      | 2.1 1.38     |
| 1971.41 |      | 1.7 1.16     |

SPECTRUM - MS

7-23-13\_HMG76\_981\_MS5\_1229\_997\_646\_02.raw

ITMS + p ESI E Full ms5 981.80@cid35.00 1229.00@cid35.00 997.50@cid35.00 647.00@cid35.00  
[175.00-700.00]

Scan #: 1-50

RT: 0.00-8.84

AV: 50

m/z Intensity Relative

|        |     |       |
|--------|-----|-------|
| 204.01 | 0.2 | 1.67  |
| 220.06 | 0.2 | 1.28  |
| 227.09 | 1.2 | 10.25 |
| 229.13 | 0.4 | 3.71  |
| 236.09 | 0.8 | 7.17  |
| 243.09 | 0.1 | 1.04  |
| 245.09 | 2.4 | 20.57 |
| 246.19 | 0.1 | 0.84  |
| 287.13 | 0.2 | 1.55  |
| 315.07 | 0.2 | 1.84  |
| 315.25 | 0.2 | 1.90  |
| 343.27 | 0.3 | 2.18  |
| 350.21 | 0.1 | 0.71  |
| 353.18 | 0.1 | 1.05  |
| 366.24 | 0.3 | 2.29  |
| 367.24 | 0.2 | 1.79  |



|        |      |        |
|--------|------|--------|
| 368.21 | 0.3  | 2.76   |
| 369.18 | 0.2  | 1.39   |
| 371.18 | 0.1  | 0.76   |
| 378.23 | 0.6  | 4.79   |
| 380.34 | 0.2  | 1.80   |
| 382.23 | 0.7  | 5.76   |
| 383.28 | 0.1  | 0.98   |
| 384.21 | 0.8  | 6.56   |
| 385.19 | 11.8 | 100.00 |
| 386.21 | 1.4  | 11.91  |
| 398.25 | 0.2  | 1.27   |
| 408.16 | 0.1  | 1.06   |
| 424.20 | 0.6  | 5.33   |
| 425.21 | 0.1  | 1.23   |
| 433.29 | 0.2  | 1.77   |
| 440.23 | 1.9  | 16.40  |
| 441.31 | 0.2  | 2.00   |
| 442.27 | 1.8  | 15.22  |
| 443.22 | 0.1  | 1.17   |
| 443.35 | 0.2  | 1.34   |
| 458.25 | 0.9  | 7.62   |
| 459.21 | 0.1  | 0.76   |
| 459.35 | 0.1  | 0.88   |
| 503.32 | 0.1  | 0.74   |
| 530.31 | 0.1  | 0.89   |
| 531.28 | 0.1  | 0.75   |
| 572.34 | 6.3  | 53.01  |
| 573.33 | 2.8  | 23.89  |
| 574.36 | 0.3  | 2.39   |
| 575.34 | 3.5  | 29.26  |
| 576.35 | 0.9  | 8.00   |
| 604.41 | 0.8  | 6.53   |
| 646.34 | 1.9  | 16.02  |
| 647.41 | 0.4  | 3.75   |

SPECTRUM - MS

7-23-13\_HMG76\_981\_MS3\_1109\_02.raw

ITMS + p ESI E Full ms3 981.80@cid35.00 1109.60@cid35.00 [305.00-1200.00]

Scan #: 1-50

RT: 0.00-9.71

AV: 50

m/z Intensity Relative

|        |     |      |
|--------|-----|------|
| 380.21 | 0.0 | 0.18 |
| 385.19 | 1.0 | 3.76 |
| 398.20 | 0.2 | 0.65 |
| 412.22 | 0.3 | 0.98 |
| 424.25 | 0.0 | 0.19 |
| 440.24 | 0.2 | 0.81 |
| 442.20 | 0.1 | 0.41 |
| 442.35 | 0.1 | 0.30 |

|         |      |        |
|---------|------|--------|
| 444.25  | 0.1  | 0.27   |
| 454.27  | 0.1  | 0.32   |
| 458.29  | 0.1  | 0.51   |
| 470.28  | 0.1  | 0.38   |
| 472.04  | 0.0  | 0.15   |
| 472.28  | 0.1  | 0.50   |
| 486.29  | 4.9  | 18.68  |
| 524.40  | 0.0  | 0.18   |
| 572.31  | 0.5  | 1.84   |
| 573.32  | 0.1  | 0.30   |
| 575.34  | 0.4  | 1.58   |
| 598.30  | 0.4  | 1.47   |
| 604.44  | 0.1  | 0.27   |
| 646.37  | 26.1 | 100.00 |
| 660.33  | 0.1  | 0.21   |
| 685.38  | 0.1  | 0.26   |
| 690.40  | 0.2  | 0.93   |
| 706.40  | 0.1  | 0.30   |
| 708.39  | 1.3  | 5.01   |
| 778.55  | 0.1  | 0.21   |
| 799.43  | 2.6  | 9.98   |
| 831.40  | 0.0  | 0.14   |
| 831.56  | 0.0  | 0.15   |
| 873.49  | 18.1 | 69.50  |
| 875.52  | 0.1  | 0.36   |
| 891.46  | 0.1  | 0.35   |
| 903.43  | 0.2  | 0.61   |
| 905.47  | 0.6  | 2.35   |
| 908.05  | 0.0  | 0.16   |
| 908.52  | 0.2  | 0.79   |
| 921.32  | 0.1  | 0.20   |
| 921.55  | 0.1  | 0.48   |
| 922.15  | 0.0  | 0.15   |
| 922.55  | 0.2  | 0.67   |
| 922.74  | 0.0  | 0.15   |
| 1003.55 | 0.0  | 0.17   |
| 1006.05 | 0.1  | 0.40   |
| 1035.59 | 0.2  | 0.64   |
| 1038.51 | 0.1  | 0.24   |
| 1067.59 | 0.3  | 1.30   |
| 1109.13 | 0.1  | 0.36   |
| 1109.62 | 3.7  | 14.24  |

SPECTRUM - MS

7-23-13\_HMG76\_981\_MS4\_1109\_646\_01.raw

ITMS + p ESI E Full ms4 981.80@cid35.00 1109.60@cid35.00 647.00@cid35.00 [175.00-700.00]

Scan #: 1-89

RT: 0.00-45.25

AV: 89

m/z      Intensity      Relative

|        |     |        |
|--------|-----|--------|
| 194.01 | 0.0 | 0.78   |
| 204.05 | 0.0 | 1.47   |
| 211.12 | 0.0 | 0.62   |
| 218.06 | 0.0 | 0.75   |
| 220.11 | 0.0 | 0.76   |
| 227.08 | 0.1 | 11.24  |
| 229.12 | 0.0 | 4.43   |
| 236.15 | 0.0 | 3.98   |
| 245.10 | 0.2 | 21.20  |
| 284.14 | 0.0 | 0.44   |
| 287.18 | 0.0 | 0.76   |
| 292.11 | 0.0 | 0.74   |
| 311.16 | 0.0 | 0.69   |
| 315.17 | 0.0 | 3.21   |
| 324.22 | 0.0 | 0.71   |
| 343.22 | 0.0 | 4.06   |
| 353.19 | 0.0 | 1.26   |
| 364.17 | 0.0 | 0.40   |
| 366.13 | 0.0 | 2.41   |
| 367.20 | 0.0 | 1.53   |
| 368.24 | 0.0 | 1.66   |
| 369.22 | 0.0 | 1.55   |
| 371.11 | 0.0 | 0.40   |
| 371.35 | 0.0 | 0.46   |
| 378.04 | 0.0 | 1.88   |
| 378.24 | 0.0 | 3.45   |
| 380.21 | 0.0 | 4.57   |
| 382.22 | 0.0 | 5.53   |
| 384.16 | 0.0 | 5.86   |
| 385.18 | 0.8 | 100.00 |
| 396.31 | 0.0 | 0.38   |
| 398.23 | 0.0 | 2.00   |
| 408.26 | 0.0 | 0.62   |
| 422.21 | 0.0 | 0.41   |
| 424.20 | 0.0 | 5.61   |
| 433.23 | 0.0 | 1.24   |
| 440.23 | 0.1 | 16.59  |
| 442.24 | 0.1 | 15.41  |
| 456.20 | 0.0 | 0.58   |
| 457.80 | 0.0 | 0.56   |
| 458.22 | 0.1 | 10.84  |
| 498.27 | 0.0 | 0.70   |
| 530.29 | 0.0 | 1.27   |
| 572.32 | 0.6 | 69.04  |
| 573.32 | 0.1 | 14.60  |
| 575.33 | 0.3 | 34.54  |
| 600.39 | 0.0 | 0.44   |
| 604.19 | 0.0 | 2.48   |
| 604.43 | 0.0 | 5.98   |
| 646.37 | 0.4 | 50.98  |

SPECTRUM - MS

10-4-13\_HMG76\_981\_MS4\_1109\_486\_01.raw

ITMS + p ESI Full ms4 981.80@cid35.00 1109.60@cid35.00 487.00@cid35.00 [130.00-500.00]

Scan #: 1-101

RT: 0.00-25.64

AV: 101

| m/z    | Intensity | Relative |
|--------|-----------|----------|
| 149.18 | 0.0       | 0.37     |
| 162.00 | 0.0       | 0.31     |
| 176.04 | 0.0       | 0.23     |
| 176.97 | 0.0       | 0.28     |
| 178.08 | 0.0       | 1.41     |
| 180.06 | 0.0       | 0.36     |
| 188.07 | 0.0       | 0.49     |
| 192.06 | 0.0       | 0.17     |
| 194.04 | 0.0       | 0.39     |
| 199.20 | 0.0       | 0.24     |
| 204.16 | 0.0       | 0.16     |
| 208.15 | 0.0       | 7.07     |
| 211.07 | 0.0       | 0.53     |
| 218.18 | 0.0       | 0.62     |
| 218.45 | 0.0       | 0.23     |
| 220.19 | 0.0       | 1.53     |
| 222.11 | 0.0       | 0.22     |
| 227.22 | 0.0       | 0.25     |
| 241.11 | 0.0       | 7.33     |
| 250.13 | 0.0       | 6.30     |
| 252.12 | 0.0       | 14.01    |
| 257.13 | 0.0       | 2.51     |
| 259.13 | 0.2       | 97.19    |
| 268.10 | 0.0       | 7.22     |
| 301.24 | 0.0       | 1.19     |
| 308.91 | 0.0       | 0.19     |
| 315.42 | 0.0       | 0.17     |
| 324.38 | 0.0       | 0.35     |
| 329.20 | 0.0       | 21.16    |
| 329.83 | 0.0       | 0.21     |
| 341.27 | 0.0       | 1.17     |
| 342.31 | 0.0       | 0.38     |
| 356.58 | 0.0       | 0.44     |
| 368.14 | 0.0       | 0.52     |
| 380.10 | 0.0       | 0.17     |
| 382.30 | 0.0       | 0.78     |
| 384.27 | 0.0       | 3.26     |
| 387.33 | 0.0       | 0.18     |
| 394.14 | 0.0       | 0.21     |
| 396.62 | 0.0       | 0.34     |
| 410.15 | 0.0       | 1.75     |
| 410.55 | 0.0       | 0.35     |
| 412.24 | 0.2       | 100.00   |

|        |     |       |
|--------|-----|-------|
| 413.25 | 0.0 | 0.31  |
| 415.29 | 0.0 | 0.79  |
| 444.25 | 0.2 | 67.27 |
| 454.29 | 0.0 | 0.60  |
| 456.18 | 0.0 | 3.02  |
| 458.28 | 0.0 | 0.30  |
| 486.17 | 0.0 | 1.35  |

SPECTRUM - MS

10-4-13\_HMG76\_981\_MS6\_827\_997\_894\_1348\_01.raw

ITMS + p ESI E Full ms6 981.80@cid35.00 827.40@cid35.00 997.60@cid35.00 895.00@cid35.00  
1348.20@cid35.00 [370.00-1400.00]

Scan #: 1-101

RT: 0.00-41.54

AV: 101

| m/z | Intensity | Relative |
|-----|-----------|----------|
|-----|-----------|----------|

|         |     |        |
|---------|-----|--------|
| 435.33  | 0.0 | 0.66   |
| 486.09  | 0.0 | 0.47   |
| 486.36  | 0.0 | 1.26   |
| 502.33  | 0.0 | 0.70   |
| 520.41  | 0.0 | 0.42   |
| 534.35  | 0.1 | 26.23  |
| 535.39  | 0.0 | 4.61   |
| 536.41  | 0.0 | 0.50   |
| 625.39  | 0.0 | 1.66   |
| 646.29  | 0.0 | 2.17   |
| 646.49  | 0.0 | 1.13   |
| 647.45  | 0.0 | 0.39   |
| 706.47  | 0.0 | 0.64   |
| 708.21  | 0.0 | 0.44   |
| 722.42  | 0.0 | 0.65   |
| 724.44  | 0.4 | 100.00 |
| 725.43  | 0.1 | 27.87  |
| 726.37  | 0.0 | 1.17   |
| 726.50  | 0.0 | 1.02   |
| 836.51  | 0.0 | 0.68   |
| 837.49  | 0.0 | 0.48   |
| 863.37  | 0.0 | 0.34   |
| 863.57  | 0.0 | 0.41   |
| 877.46  | 0.0 | 0.95   |
| 919.60  | 0.0 | 1.05   |
| 921.50  | 0.0 | 0.34   |
| 937.55  | 0.0 | 0.53   |
| 1045.76 | 0.0 | 0.37   |
| 1067.53 | 0.0 | 3.39   |
| 1067.74 | 0.0 | 0.98   |
| 1068.69 | 0.0 | 0.57   |
| 1141.17 | 0.0 | 0.60   |
| 1141.61 | 0.0 | 11.06  |
| 1142.58 | 0.0 | 4.05   |

|         |     |      |
|---------|-----|------|
| 1142.73 | 0.0 | 1.86 |
| 1142.92 | 0.0 | 0.47 |
| 1143.52 | 0.0 | 2.50 |
| 1143.70 | 0.0 | 3.33 |
| 1144.69 | 0.0 | 2.91 |
| 1159.61 | 0.0 | 1.79 |
| 1160.55 | 0.0 | 0.65 |
| 1160.79 | 0.0 | 0.41 |
| 1230.49 | 0.0 | 0.38 |
| 1248.75 | 0.0 | 1.88 |
| 1315.51 | 0.0 | 0.70 |
| 1315.75 | 0.0 | 0.77 |
| 1347.59 | 0.0 | 1.03 |
| 1347.79 | 0.0 | 2.83 |
| 1348.76 | 0.0 | 2.54 |
| 1349.77 | 0.0 | 0.87 |
